# Supplementary material for: Triadic communication with teenagers and young adults with cancer: a systematic literature review – ‘make me feel like I’m not the third person’
Source: PubMed Central journal article supplement (PMC10875529; doi:10.1136/bmjopen-2023-080024), 2024-02-17
Supplement: bmjopen-2023-080024.draft_revisions.pdf [file bmjopen-2023-080024.draft_revisions.pdf]

# BMJ Open

BMJ Open is committed to open peer review. As part of this commitment we make the peer review history of every article we publish publicly available.

When an article is published we post the peer reviewers' comments and the authors' responses online. We also post the versions of the paper that were used during peer review. These are the versions that the peer review comments apply to.

The versions of the paper that follow are the versions that were submitted during the peer review process. They are not the versions of record or the final published versions. They should not be cited or distributed as the published version of this manuscript.

BMJ Open is an open access journal and the full, final, typeset and author-corrected version of record of the manuscript is available on our site with no access controls, subscription charges or pay-per-view fees (<http://bmjopen.bmj.com>).

If you have any questions on BMJ Open's open peer review process please email [info.bmjopen@bmj.com](mailto:info.bmjopen@bmj.com)

# BMJ Open

## Triadic communication with teenagers and young adults with cancer: a systematic literature review: "Make me feel like I'm not the third person"

|                               |                                                                                                                                                                                                                                                                                                                                                                                                                                                       |
|-------------------------------|-------------------------------------------------------------------------------------------------------------------------------------------------------------------------------------------------------------------------------------------------------------------------------------------------------------------------------------------------------------------------------------------------------------------------------------------------------|
| Journal:                      | <i>BMJ Open</i>                                                                                                                                                                                                                                                                                                                                                                                                                                       |
| Manuscript ID                 | bmjopen-2023-080024                                                                                                                                                                                                                                                                                                                                                                                                                                   |
| Article Type:                 | Original research                                                                                                                                                                                                                                                                                                                                                                                                                                     |
| Date Submitted by the Author: | 18-Sep-2023                                                                                                                                                                                                                                                                                                                                                                                                                                           |
| Complete List of Authors:     | Critoph, Deborah; University of Cambridge, Department of Public Health & Primary Care<br>Taylor, Rachel; University College London Hospitals NHS Foundation Trust, CNMAR;<br>Spathis, Anna; University of Cambridge<br>Duschinsky, Robbie; University of Cambridge<br>Clyne, Ella; University of Cambridge<br>Hatcher, Helen; Cambridge University Hospitals NHS Foundation Trust<br>Smith, Luke; Cambridge University Hospitals NHS Foundation Trust |
| Keywords:                     | Adolescents < Adolescent, Decision Making, EDUCATION & TRAINING (see Medical Education & Training), ONCOLOGY                                                                                                                                                                                                                                                                                                                                          |
|                               |                                                                                                                                                                                                                                                                                                                                                                                                                                                       |

SCHOLARONE™  
Manuscripts

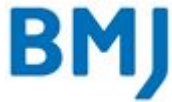

I, the Submitting Author has the right to grant and does grant on behalf of all authors of the Work (as defined in the below author licence), an exclusive licence and/or a non-exclusive licence for contributions from authors who are: i) UK Crown employees; ii) where BMJ has agreed a CC-BY licence shall apply, and/or iii) in accordance with the terms applicable for US Federal Government officers or employees acting as part of their official duties; on a worldwide, perpetual, irrevocable, royalty-free basis to BMJ Publishing Group Ltd ("BMJ") its licensees and where the relevant Journal is co-owned by BMJ to the co-owners of the Journal, to publish the Work in this journal and any other BMJ products and to exploit all rights, as set out in our [licence](#).

The Submitting Author accepts and understands that any supply made under these terms is made by BMJ to the Submitting Author unless you are acting as an employee on behalf of your employer or a postgraduate student of an affiliated institution which is paying any applicable article publishing charge ("APC") for Open Access articles. Where the Submitting Author wishes to make the Work available on an Open Access basis (and intends to pay the relevant APC), the terms of reuse of such Open Access shall be governed by a Creative Commons licence – details of these licences and which [Creative Commons](#) licence will apply to this Work are set out in our licence referred to above.

Other than as permitted in any relevant BMJ Author's Self Archiving Policies, I confirm this Work has not been accepted for publication elsewhere, is not being considered for publication elsewhere and does not duplicate material already published. I confirm all authors consent to publication of this Work and authorise the granting of this licence.

1  
2  
3 **Triadic communication with teenagers and young adults with cancer: a systematic literature**  
4 **review: “Make me feel like I’m not the third person”**  
5  
6

7 Deborah J Critoph MSc, Rachel M Taylor PhD, Anna Spathis MD, Robbie Duschinsky PhD,  
8 Helen Hatcher MD PhD, Ella Clyne, Isla Kuhn MSc, Luke AM Smith  
9  
10

11 Deborah Critoph, PhD student, Department of Public Health & Primary Care, University of  
12 Cambridge  
13  
14

15  
16 Rachel Taylor, Director of the CNMAR, Centre for Nurse, Midwife and Allied Health Profession  
17 Led Research, University College London Hospitals NHS Foundation Trust, London, NW1 2PG  
18  
19

20 Anna Spathis, Assistant Professor, Department of Public Health and Primary Care, University  
21 of Cambridge  
22  
23

24 Robbie Duschinsky, Professor of Social Science & Health, Department of Public Health &  
25 Primary Care, University of Cambridge  
26  
27

28 Helen Hatcher, Consultant in Medical and TYA Oncology, Clinical and Regional Lead for  
29 Sarcoma and Young People with Cancer, Clinical Director EoE TYAc ODN  
30  
31

32  
33 Ella Clyne, Medical Student, University of Cambridge  
34  
35

36 Isla Kuhn, Head of Medical Library Services, University of Cambridge Medical Library  
37  
38

39 Luke Smith, Junior Clinical Fellow in TYA Haematology and Oncology, Cambridge University  
40 Hospitals NHS Foundation Trust  
41  
42

43 Correspondence: Deborah Critoph, [dc625@medschl.cam.ac.uk](mailto:dc625@medschl.cam.ac.uk)  
44  
45

46 Keywords: Teenagers and young adults with cancer (TYAC), adolescents, triadic  
47 communication, communication, supporters, third person, parents, support network, health  
48 care, professionals, experiences, impact.  
49  
50

51 Abstract = 299/300

52 Word count = 3928

53 Number of tables = 4

54 Number of figures = 1  
55  
56  
57  
58  
59  
60

## Abstract

### Background

Although most young people have limited encounters with healthcare, around 2,500 young people in the United Kingdom (UK) are diagnosed with cancer each year. Clinical communication needs of teenagers and young adults with cancer (TYAC) are increasingly recognised to differ significantly from younger children and older adults. Triadic communication refers to the presence of a third party, such as a parent, carer, or companion in clinical encounters and is a key feature of TYAC care.

### Aim

We sought to understand who is present with TYACs, synthesise TYACs experiences of triadic communication with HCPs and supporter(s), and explore the impact of triadic communication for TYACs. We generated three research questions to focus this review:

### Review questions:

1. Who is present with TYACs in healthcare consultations/communication? For example, who are the supporters?
2. What are TYACs' experiences of communication with the supporter present?
3. What is the impact of a TYAC's supporter being present in the communication?

### Methods

We conducted a systematic review and narrative synthesis of empirical evidence published since 2005. An inductive thematic analysis was undertaken to identify the main, recurrent, and important data across the studies in answering each research question.

### Results

A total of 7,727 studies were identified in the search, of which 33 fulfilled the inclusion criteria. We found that mothers were the most common supporter in clinical communication encounters. The experience of communication in the presence of a third person is paradoxical in nature – the supporter can help or hinder the involvement of the young person in their care. Overall, young people are not included in communication and decisions about their care to the level they want.

### Conclusion

Triadic communication in TYAC is common, complex, and dynamic. Due to the degree of challenge and nuances raised, HCPs need further training on effective triadic communication.

PROSPERO registration CRD42022374528

### Strengths & limitations of this study

- We searched systematically and thoroughly for eligible studies, but this is not a well-indexed field of research, and therefore it is possible that some relevant studies were not included in the review.
- We limited the review to a UK TYAC age range and not the broader age used elsewhere, so the conclusions are applicable to younger adults, up to aged 24 only and not necessarily the age of young adulthood used in some countries (between 29 to 39).
- We only included papers published in English and the results may not be applicable to other countries especially where cultural differences affect parental-TYAC or other familial/romantic relational dynamics.
- International representation was seen in the eligible studies and TYAC ages were included across the entirety of the specified UK age range.
- Studies represented the journey throughout the cancer experience from diagnosis to survivorship and end of life care.

### Introduction

Adolescence is a time of transition where young people navigate monumental physical, cognitive, emotional, and behavioural milestones to develop a sense of self-identity and gain independence. Although most young people have limited encounters with healthcare, around 2,500 young people in the United Kingdom (UK) are diagnosed with cancer each year, which is the leading cause of non-traumatic death in young people in the United States (US) and Europe.<sup>(1)</sup> Teenagers and young adults with cancer (TYACs) have unique healthcare needs and there has been an international drive to develop developmentally appropriate evidence-based specialist care, provided by appropriately trained healthcare professionals (HCPs).<sup>(2)</sup>

Communication with TYACs can be particularly challenging: a life-limiting condition intersects an age associated with emotional reactivity and variable maturity. TYACs clinical communication needs are increasingly recognised to differ significantly from younger children and older adults. Research indicates TYACs can have little meaningful involvement in conversations with HCPs: almost half of children and young people reported not being involved in decisions about their care.<sup>(3)</sup> HCPs recognise this and consider young people amongst the hardest patients to communicate with.<sup>(4)</sup> However, HCPs receive little training about how best to manage these clinical encounters. TYACs who are not heard or understood can be labelled as 'challenging', 'hard to reach' and 'disengaged'. This may adversely impact care and contribute to poor physical and psychological outcomes. Despite these issues, there are limited opportunities for formal postgraduate education in communication with TYACs for HCPs, with most training being ad hoc and not interprofessional.<sup>(5,6)</sup> Effective communication with TYACs has been recognised as a key national research priority. In a UK-wide survey of young patients' own research priorities, communication was a striking cross-cutting theme.<sup>(7)</sup>

1  
2  
3  
4  
5  
6  
7  
8  
9  
10  
11  
12  
13  
14  
15  
16  
17  
18  
19  
20  
21  
22  
23  
24  
25  
26  
27  
28  
29  
30  
31  
32  
33  
34  
35  
36  
37  
38  
39  
40  
41  
42  
43  
44  
45  
46  
47  
48  
49  
50  
51  
52  
53  
54  
55  
56  
57  
58  
59  
60

Recent research into clinical communication with TYACs has offered some insight into the complexities of communication with this specialist patient group.(8–12) Yet one area that has received less attention is triadic communication. Triadic communication refers to the presence of a third party, such as a parent, carer, or companion in clinical encounters (13) and the presence of such a person was found to occur in 87% of TYAC consultations.(11) As a commonly occurring form of communication in TYAC care, there is a need to understand the theoretical basis and relevance of triadic communication to clinical practice. For the purposes of this review, we refer to this third person as a supporter. Triadic communication literature from children and older adults exists. (14–17) Notably this includes a meta-analytic review of provider-patient-companion of adults,(18) one large systematic review of physician-patient-companion communication and decision-making in adults (19) and one review of doctor-parent-child communication.(20) Whilst informative, these studies are with children and adults, not this unique age-group of emerging adulthood with a significant life threatening diagnosis such as cancer. Also, these studies focus on doctor-patient-third person communication, whereas TYAC care involves a range of interdisciplinary professionals. This review aims to understand what is known about triadic communication with TYACs in healthcare communication.

### **Aim**

We sought to understand who is present with TYACs, synthesise TYACs experiences of triadic communication with HCPs and supporter(s), and develop insights into the impact of triadic communication for TYACs.

### **Review questions:**

1. Who is the supporter present with TYACs in healthcare consultations and communication?
2. What are TYACs' experiences of communication with the supporter present?
3. What is the impact on a TYAC's supporter being present in the communication?

### **Methods**

We conducted a systematic review and narrative synthesis (21,22) of empirical evidence published since 2005, the year of publication of the National Institute for Care Excellence (NICE) Improving Outcomes Guidance, the guidance document underpinning TYAC services in England.(2) The review protocol was prospectively registered with PROSPERO (CRD42022374528). We designed the search to identify and map the available evidence using a broad scope to gain an overview of the pertinent literature, identify knowledge gaps and clarify concepts. The search strategy was developed and refined with an information scientist (I.K.). Keywords were generated across five strands detailed in Table 1, with strands combined with the Boolean operator 'AND'. The search was conducted across five databases: Medline, CINAHL, Embase, PsycINFO and AMED (supplemental file).

**Table 1. Search Terms**Strand 1 – TYAC

TYA cancer or TYA oncology or teenage and young adult adj5 cancer or teenage and young adult adj5 oncology or teenage\* adj5 cancer or teenage\* adj5 oncology or adolescen\* adj 5 cancer or adolescen\* adj 5 oncology or young people adj 5 cancer or young people adj 5 oncology

Strand 2 – communication

Cancer OR oncology OR malignancy OR leukaemia OR lymphoma

Strand 3 – supporters

Communication skills OR communicat\* OR discuss\* OR disclos\* OR inform\* OR interact OR relationship building OR decision making OR communication tools OR communication aids OR psychosocial assessment

Strand 4 - impact

affect OR effect OR influence OR result OR resultant OR impact

Strand 5 - experience

encounter OR involvement OR occurrence OR feel OR "go through" OR experience\*

TYAC: teenage and young adult with cancer

Database searches were compiled and de-duplicated in Mendeley, abstracts were screened in Rayyan by two researchers (D.J.C and L.A.M.S.), and 155 full articles were read by three researchers (L.A.M.S., D.J.C., and R.M.T) for eligibility of inclusion in the final analysis, with disagreements resolved by discussion. Papers were included if: they presented empirical research published after 2005; participants had malignant disease, diagnosed aged 13-24 years (for over 50% of participants); the research addressed any area of clinical communication; and the research included supporters (parents, partners, carers, friends etc). Papers were excluded if they were: conference abstracts, unpublished articles, systematic reviews, single case studies, validation research methodology, studies using retrospective documentation in clinical notes, articles focusing on information needs rather than communication skills, or were not in English.

A review-specific data extraction form was used to record participant characteristics and methods from each included paper and results relevant to the three review questions. The final number of included articles totalled 33, the remaining 122 were excluded based on the participants' ages, focus on HCPs or information giving. In tandem to the data extraction process, two members of the review team (E.C. and D.J.C.) independently assessed each paper in terms of its internal validity, appropriateness, and contribution to answering the review questions, using a review-specific version of Gough's Weight of Evidence criteria.(23) Discrepancies in assessment decisions were discussed between reviewers and final scores were agreed through consensus.

Extracted data were entered into Excel to aid the narrative synthesis of the included papers.(21,22) All articles, irrespective of relevance and quality, were included in the review. However, those rated 'medium' and 'high' were given greater weight in the synthesis. An inductive thematic analysis was undertaken to identify the main, recurrent, and important



1  
2  
3 data across the studies related to answering each research question. D.J.C. and E.C. explored  
4 heterogeneity across the studies. The integration of results from studies utilising different  
5 methods and epistemological positions was supported by L.A.M.S. and R.M.T., and consensus  
6 in synthesis was reached. The synthesis was further refined through discussion of the review  
7 of results and their implications with clinicians, interdisciplinary academic audiences, and all  
8 of the co-authors.  
9  
10

## 11 12 13 **Results**

14 A total of 7,727 studies were identified in the search, of which 33 fulfilled the inclusion criteria  
15 (Figure 1). The included articles are summarised in Table 2. (table 2 uploaded separately)  
16  
17

18 All points across the cancer trajectory were represented in the final papers: diagnosis (n=6);  
19 (12,24–28) on treatment (n=17); (29–45) end of treatment (completed within one year) (n=2);  
20 (46,47) survivorship (more than one-year post-treatment) (n=2); (5,48) and end of life care  
21 (n=5). (49–53) One study included patients at more than one point along the cancer care  
22 continuum. (54) Most studies (n=18) were conducted in the US (24,27,28,30,34–36,38–  
23 45,49,51,53) other countries included the UK, (25,31,32) Australia, (37,47,48) Norway, (12,52)  
24 Israel, (46) Iran, (29) Mexico, (50) France, (33) Denmark, (26) and Taiwan, (54) one study  
25 recruited from three European countries. (5) Studies used predominantly qualitative methods  
26 (n=29) but there were two mixed methods studies and two using quantitative methods.  
27 Weight of evidence criteria indicated four were high evidence, (24,30,34,44) twenty-two were  
28 medium (5,12,25,27–29,31–33,35,36,38–41,43,45,46,48–50,54) and seven were low  
29 evidence. (26,37,42,47,51–53)  
30  
31  
32  
33

34 The categories used to separate the age groups were lower adolescence (11-14 years), middle  
35 adolescence (15-17 years), upper adolescence (18-21 years) and emerging adulthood (22  
36 onwards). Of the papers where the age range at diagnosis could be deduced, the majority of  
37 these (19 out of 24) spanned three or more age categories (Table 3). All the papers spanned  
38 two or more age categories. In nine of the papers, the age ranges at diagnosis were not  
39 available (as age at diagnosis was expressed as a mean or median). Given these factors, it is  
40 difficult to ascertain whether any between age group differences exist.  
41  
42  
43

44 Table 3 – Age range of patients at diagnosis  
45

| 46 <b>Category</b>                                               | 47 <b>Number of papers</b> |
|------------------------------------------------------------------|----------------------------|
| 48 Lower and middle adolescence                                  | 4                          |
| 49 Lower, middle, and upper adolescence                          | 8                          |
| 50 Lower, middle, upper adolescence and<br>51 emerging adulthood | 6                          |
| 52 Middle and upper adolescence                                  | 1                          |
| 53 Middle, upper adolescence and emerging<br>54 adulthood        | 5                          |
| 55 Not specified                                                 | 9                          |

56  
57  
58  
59  
60

### Who is present with TYACs in healthcare consultations and communication?

The majority of supporters were mothers (63.5%). When combined, parents represented nearly all the supporters in the included studies (93.5%), see Table 4. Non-parental supporters (2.6%) included partners, sisters, aunts, and grandmothers. The remaining supporters were not categorised due to insufficient information in the article's demographics data (3.9%).(52,53)

Table 4 – Table of supporters

| Supporter type                        | Number of supporters | Percentage quoted to 1 decimal place (%) |
|---------------------------------------|----------------------|------------------------------------------|
| "Mother"                              | 342                  | 63.5                                     |
| "Father"                              | 122                  | 22.6                                     |
| "Both parents"                        | 20                   | 3.7                                      |
| "parents" no further specification    | 20                   | 3.7                                      |
| "Grandmother"                         | 2                    | 0.4                                      |
| "Sister"                              | 3                    | 0.6                                      |
| "Partner"                             | 3                    | 0.6                                      |
| "Aunt"                                | 3                    | 0.6                                      |
| "supporters" no further specification | 21                   | 3.9                                      |
| "other"                               | 3                    | 0.6                                      |
| <b>Total</b>                          | <b>539</b>           | <b>100.2</b>                             |

### What are TYACs' experiences of communication with the supporter present?

The presence of supporters was concurrently helpful and challenging for TYACs. Supporters undertook several helpful roles and responsibilities: they asked questions on behalf of the TYAC, retained information from HCPs, acted as a conduit of information between the TYAC and HCP, and acted as a "sounding board" for the young person.(25,30,44) Some supporters promoted self-advocacy and autonomy for the young person (27,38,40,45). Some reported symptoms on their behalf (44) and proactively negotiated changes to treatment schedules in the interest of the young person.(38)

Findings also suggested that young people could experience limited or ineffective communication in the presence of a supporter. Communication could be directed towards the supporter, not the young person.(27,30,35) Supporters could receive information in the absence of the TYAC and subsequently filter the content before delivering the information to TYACs.(29,32,33,54): *"The parents had hidden a truth that was not theirs to hide"*p533.(33) This reflected the broader predicament that supporters' priorities at times might have competed with those of young people. (25,33,49,50) Supporters could dominate the communication encounter, for instance, parents were seen to interrupt young people, especially when time was limited. (50) Frederick et al found the mean time for adolescent to

1  
2  
3 clinician communication was only 5.5% of the total consultation and parent conversation  
4 turns directed towards clinicians comprised a mean of 37.5% of all conversation turns.  
5 Clinicians directed most communication at the parent rather than the adolescent and none  
6 of the clinicians offered patients the opportunity to speak with them alone. (34)  
7  
8

9 Mutual protectionism appeared to occur, with TYACs and supporters seeking to protect each  
10 other from difficult information leading to non-disclosure when both were present. A  
11 diagnosis of cancer is devastating for the young person, supporter(s), family, and the wider  
12 social network. Repeatedly, there were references to reduced disclosure between the young  
13 person and their supporter, in an attempt to shield each other from emotional  
14 distress.(12,30,35,37,38,40,44,52) TYACs could experience discomfort and guilt in seeing  
15 parents tearful and worried, and felt a burden in response to observing the emotions of  
16 supporters.(37,38,51) Some TYACs sought to limit this by withholding concerns to protect  
17 their supporters: *"I couldn't talk to mum about my concerns because I didn't want to hurt her"*  
18 p 37.(37) In equal measure, supporters were characterised as working hard to stay in control  
19 of emotions, be strong and stay in the "now", and they channelled energy into helping.(12,30)  
20 Yet this could contribute to an environment of non-disclosure that had the potential to create  
21 future communication challenges, such as supporters not knowing the young person's wishes.  
22 Examples of this were evident within the end of life care studies.(51,52) Friebert et al found  
23 that 86% of young people wanted to receive prognostic information as soon as possible but  
24 only 39% of families knew that.(51) Similarly, Jacobs et al found that young people's end of  
25 life wishes were not known by their families.(52) In instances where the young person may  
26 not be able to communicate, it may help families relieve the impossible burden of making  
27 difficult decisions or feelings of regret, if the young person's perspective and wishes are  
28 known.(53)  
29  
30  
31  
32  
33  
34

### 35 **What is the impact of a TYAC's supporter being present in the communication?**

36  
37 Supporters have the potential to facilitate, complicate or obstruct the young person's  
38 involvement in decision-making. Involvement had a positive impact on recall,(41) and may  
39 improve autonomy, efficacy, adherence, and future self-management.(24) However, the  
40 participation of supporters may be experienced as stressful by TYAC as they may become side-  
41 lined. (25,39,54) The presence of supporters impacted the young person's level of  
42 involvement in decision-making in several ways. In some cases, supporters empowered TYACs  
43 to make decisions by withholding their opinion (27) and deferring the final decision to  
44 TYACs.(30) However, supporters and TYACs did not perceive decision-making in the same  
45 way.(46) Supporters believed that young people oversaw decisions about their care; however,  
46 this was not what young people recounted.(24) TYACs reported a lack of communication and  
47 limited involvement in decisions (24,29,45) associated later with decisional regret.(24,36)  
48  
49  
50

51  
52 Deferral of communication and decisions from the young person to supporters was  
53 commonplace.(27,30,35) When supporters responded to this pathway of communication,  
54 young people then did not see a need to participate in decisions, knowing that their supporter  
55 was taking the mantle.(35) In parallel, clinicians were found to direct communication towards  
56 supporters and in extreme cases young people were completely excluded from  
57 communication and decisions. (29,34,46) An atmosphere characterised by a lack of trust,  
58 unanswered questions and uncertainty contributed to the exclusion of young people who  
59  
60

1  
2  
3 then sought information from other sources.(29,35,38) Not allowing TYACs to choose their  
4 involvement in decision-making violated their autonomy, and increased distrust or  
5 resentment of providers and supporters and resulted in lower treatment  
6 adherence.(29,35,38)  
7  
8

9 The decisional involvement preferences of young people were not static: they were context  
10 and environment dependent. At diagnosis, heightened emotions and poor health rendered  
11 young people unable to engage in communication. (24,25,27,30,36,40) TYACs expressed a  
12 desire to be involved in decision making at different levels: some wanted limited involvement  
13 from their supporter(s) so they could take the leading role in consultations and their care;(55)  
14 several wanted collaboration with supporters and clinicians;(26,27,43) and some completely  
15 relied on supporters and HCP's to make decisions on their behalf.(44,45) Davies et al  
16 described this as agency, the ability to make free and independent choices. They highlighted  
17 the normality of this fluctuation between personal (acting independently), proxy (decisions  
18 made on behalf of someone) and collective (decisions are shared) decision making. Whilst this  
19 was not always linear, it was part of the cancer trajectory and demonstrated the fluctuating  
20 personal agency for TYACs.(31) Some young people reported that supporters and clinicians  
21 decided on the their level of involvement in communication and decision-making,(54) and  
22 TYACs commented that they did not feel the decision was theirs.(46) Decisional involvement  
23 was an interactive, complex, and multifaceted process within the context of the triad, and  
24 young people often wanted to be in control of their level of involvement.(28,30) The evidence  
25 highlighted that in the presence of a supporter, young people's choice in the their level of  
26 involvement in decisions was challenged and not routinely achieved.  
27  
28  
29  
30  
31

32 Most TYACs felt that it was important for the healthcare team to communicate with them  
33 directly and openly.(29,30,32,37,38,48,49) Time alone helped facilitate communication  
34 between TYAC and HCP, to ensure that the young person's needs were fully met.(30,35)  
35 However, time alone with HCPs was not routinely integrated as a part of consultations with  
36 TYACs. (34,47) In fact, clinicians were reported as frequently speaking more to parents and  
37 TYACs received limited communication from HCPs.(27,30,34,35) In the presence of  
38 supporters, as well as withholding concerning information, young people reported feeling  
39 discomfort when discussing sensitive topics such as sex or fertility preservation.(27,35)  
40  
41  
42

43 Young people wanted time alone to communicate with HCPs directly for a variety of reasons.  
44 This private line of communication offered a sense of personal agency and allowed them to  
45 feel "in the loop" and promoted a sense of autonomy that was threatened by the cancer  
46 diagnosis, particularly at the point of diagnosis.(31,49) Young people wanted space to think  
47 and privacy during the cancer journey; private lines of communication with HCPs actively  
48 promoted this.(30,38,44,45) It also enabled HCPs to get to know the young person and  
49 allowed them to ask questions that they may be reluctant to ask in the presence of their  
50 supporter, because of embarrassment or emotional shielding.(30) Darabos et al found that  
51 87.5% of oncology providers considered it important to talk to the TYAC without their parents  
52 present.(30) Whilst the importance has been highlighted within the data it is also evident that  
53 this does not happen as part of routine clinical practice. This could be for several reasons such  
54 as not wanting to challenge rules of authority, uncertainty around how best to ask a parent  
55 to leave and lack of confidence when communicating with a young person alone.  
56  
57  
58  
59  
60

## Discussion

### Principal Findings

#### **Who is present with TYACs in healthcare consultations and communication? For example, who are the supporters?**

The included papers in our review demonstrated that most supporters were parents, more commonly mothers. The frequent presence of mothers in consultations is consistent with previous findings. For example, in a UK study in which TYAC nominated a caregiver, 85% were parents, and of those 80% were female.<sup>(56)</sup> We note that there is a paucity of data for non-parental supporters, and this may represent a reality of clinical practice or a bias towards TYAC-parental dyads over other relational-dyads in this field of research to date.

#### **What are TYACs' experiences of communication with the supporter present?**

TYACs experienced supporters facilitating communication by obtaining information, asking questions, advocating, and supporting personal agency of the young person; conversely supporters could hinder communication by gatekeeping information, or dominating communication and thereby rendering young people as bystanders. Young people experienced negative emotions in response to witnessing their supporters in distress.

#### **What is the impact of a TYAC's supporter being present in the communication?**

Bidirectional non-disclosure was a coping strategy used by both TYACs and supporters to protect one another from concerns and emotional burden. This limited HCPs ability to effectively assess ideas, concerns, and expectations from both parties when together. In the presence of supporters some young people were less informed, which could impair their ability to engage in decision-making conversations.

### Meaning of the study

This is the first review to look specifically at triadic communication in teenagers and young adults with cancer and has demonstrated that there is a paucity of evidence focussed specifically on triadic communication with TYACs. Of the thirty-three studies in the review only one third included all three parties in the triadic communication encounter. However, the review has enabled us to provide answers to the review questions and identify knowledge gaps, including a lack of theory describing triadic communication. Some preliminary theoretical models, such as family involvement in interpersonal healthcare processes,<sup>(57)</sup> depict the interaction pathways between patients, families and HCP and hypothesise the influence of family on interpersonal processes and outcomes of medical consultations.

The data has clearly identified that parents are the predominating supporter for TYACs, which may be surprising given the inclusion of participants up to the age of 25. Parents can play a significant role when a young person is diagnosed with cancer. Developmentally, a major characteristic that differentiates TYACs from younger children or older adults is the

1  
2  
3 progressive increase in their desire and capacity for independence, personal agency, and  
4 autonomy. This process is disrupted by a cancer diagnosis: increased parental presence can  
5 be perceived as intrusive and reflect reversion to an earlier family dynamic, anchoring  
6 adolescents in dependency, restricting self-exploration, and limiting development of a TYACs  
7 internal value and belief system.(37,58–60) This has been phrased as “retreating to family”  
8 and can impede the maintenance of sustaining a network of peers and cancer negatively  
9 impacts peer relationships.(39,61,62) Young people may often be accepting of this,  
10 particularly in the early stages of the cancer diagnosis. However, the presence of parents  
11 alters the experience and impact of communication with HCPs. It is important to highlight  
12 that there is limited literature on TYAC communication encounters with supporters other than  
13 parents.(59,63,64) Partners felt relegated to a supporting role by a parent, and mothers  
14 struggled to relinquish their existing role as primary supporter.(59,64) It is relevant to note  
15 that the participants in these three studies were in their early 20’s.  
16  
17  
18  
19

20 A key impact of triadic communication is that young people may not be involved in decision  
21 making to the level they want. This is consistent with related paediatric oncology literature  
22 which consistently reports children’s limited participation in decision-making. (65–67)  
23 Clinicians attempted to protect children from ‘too much’ information because of the  
24 perception that children are not capable or too vulnerable.(17) The important difference  
25 between paediatric and TYAC populations are the legal and ethical obligations towards TYACs  
26 who are autonomous, capacitous patients rather than to parents with parental responsibility.  
27  
28  
29

30 The findings of this review demonstrate the presence of a supporter impacts the involvement  
31 of young people in healthcare decisions. Therefore, there are legal and ethical issues, which  
32 are critically important, both in research and clinically in TYAC care particularly related to  
33 informed consent, capacity, and autonomy. The law relating to children and young people is  
34 complex and differs across the UK and internationally. The General Medical Council guidelines  
35 in the UK state, “the patient must be the first concern”.(68) HCPs have ethical and legal  
36 obligations outlined in UK best practice guidance, statute, and case law.(69) In the UK, parents  
37 can legally make decisions for children under 16 years unless the child disagrees and is  
38 deemed ‘Gillick Competent’.(70) Moreover, studies have shown children aged 14 and older  
39 can approach the level of understanding of adults.(71,72) In contrast, people aged 16 and  
40 above are legally able to make decisions for themselves in the UK and are automatically  
41 assumed to have capacity (73) and therefore, HCPs must communicate with them in  
42 developmentally appropriate ways. Clinicians face a challenge in identifying the best way to  
43 communicate with TYACs and their supporter (s). TYACs need parental involvement whilst  
44 simultaneously desiring autonomy (35) necessitating careful balancing of the needs of both  
45 parties to ensure that the young person is not relegated to a non-participant status.  
46  
47  
48  
49  
50

### 51 **Strengths and weaknesses**

52  
53  
54 Our review had a number of limitations. We searched systematically and thoroughly for  
55 eligible studies, but this is not a well-indexed field of research, and therefore it is possible that  
56 some relevant studies were not included in the review. We limited the review to a UK TYAC  
57 age range and not the broader age used elsewhere, so the conclusions are applicable to  
58 younger adults, up to aged 24 only and not necessarily the age of young adulthood used in  
59  
60

1  
2  
3 some countries (between 29 to 39). We also only included papers published in English and  
4 therefore papers reflect practices in primarily North America, Australia and Europe, the  
5 results may not be applicable to other countries especially where cultural differences affect  
6 parental-TYAC or other familial/romantic relational dynamics and where the healthcare  
7 culture may be different, e.g., more paternalistic. Despite these limitations, international  
8 representation was seen in the eligible studies, TYAC ages were included across the entirety  
9 of the specified UK age range and studies represented the journey throughout the cancer  
10 experience.  
11  
12

### 13 14 **Implications for clinicians and policy makers**

15  
16  
17 Given the degree of challenge and nuance raised, HCPs need training on effective triadic  
18 communication. Fourneret concluded that the relationship between TYACs, their parents and  
19 HCPs “as being the most difficult one in oncology”.(33) Professionals described challenges  
20 communicating with both TYACs and parents, especially when loyalties were torn between  
21 the two.(5) However, training is currently ad hoc and not interdisciplinary.(74–77)  
22 Furthermore, HCPs can find it difficult to apply teaching in this area in clinical practice.(52,78)  
23 HCPs need education and training to navigate triadic communication to optimise involvement  
24 of the young person whilst attending to a supporter’s needs. Experiential learning is the gold  
25 standard in teaching methods for clinical communication and is designed to bring about  
26 changes in learners’ skills. These evidence-based methods are through small group, problem-  
27 based simulation in a classroom, with repeated practise and rehearsal of skills under  
28 observation with detailed and descriptive feedback. This is arguably warranted here.(79,80)  
29  
30  
31

32  
33 Triadic communication is a key feature of TYAC care but requires further attention and  
34 inclusion in future iterations of key policy documents and guidelines such as the Blueprint of  
35 Care (BoC).(81) The BoC is a UK document that helps shape and deliver developmentally  
36 appropriate care to TYAC. However, it is recognised that age is poorly correlated with  
37 developmental maturity and therefore any communication framework needs to be specific  
38 to TYACs, recognising the transitional nature of adolescence meaning a one size fits all  
39 approach is likely inadequate.  
40  
41

### 42 43 **Unanswered questions and future research**

44  
45  
46 Future research is warranted to triangulate triadic perspectives and understand more about  
47 the interactional dynamics of these complex communication encounters. A key research need  
48 is investigating how best to support decision-making whilst engaging supporters,  
49 understanding their priorities and information needs may conflict.(30,35,36,39) Conflict  
50 management must also be understood in the emotional context of young adult oncology. How  
51 to effectively educate HCPs to communicate within the triad, to ensure the young person and  
52 the supporters needs are met is a priority. This needs to include how best we facilitate time  
53 alone between young patients and HCPs. Continued development and utilisation of  
54 comprehensive triadic theoretical frameworks may provide guidance and direction for future  
55 research, allowing for greater integration and progress with this diverse research area and  
56 commonly occurring form of healthcare communication.  
57  
58  
59  
60

## Conclusion

Triadic communication is a pivotal component of communicating with TYACs and the presence of supporters impacts clinical communication both positively and negatively. Young people desire a sense of personal agency, autonomy and control related to information flow and decision making. This includes private lines of communication with HCPs without the presence of supporters. HCPs recognise the importance of time alone with young people; however this does not translate to clinical practice. Therefore, further research on communication dynamics is needed to allow for the development of bespoke, TYAC focussed clinical communication training for HCPs to allow them to effectively facilitate and navigate triadic communication. This then needs to be formally embedded in national guidance and postgraduate training for HCPs working in TYAC care to allow equitable access for TYACs.

### Author Contributions:

DC, LS and RT were involved in developing the protocol; DC, IK and LS coordinated the running of the study and were responsible for data acquisition; DC, LS, RT and EC contributed to the analysis; DC drafted the manuscript. All authors have critically reviewed the manuscript for important intellectual content and have read and agreed to the published version of the manuscript. All authors agree to be accountable for all aspects of the work in ensuring that questions related to the accuracy or integrity of any part of the work are appropriately investigated and resolved.

### Conflicts of Interest:

The authors declare no conflict of interest.

### Ethics Approval:

This was a systematic review and therefore ethics approval was not required.

### Funding:

This paper presents work supported by the Wellcome Trust, (grant number G115288) under its Programme PhD for healthcare professionals course awarded to the first author Deborah Critoph, University of Cambridge. The views expressed are those of the author (s) and not necessarily those of the Wellcome Trust.

### Data availability statement:

All data relevant to the study are included in the article or uploaded as supplementary information. No previously unpublished primary data are included in the paper. All data relevant to the systematic review are included in the paper or uploaded as supplementary information.



## References:

1. Cancer Research UK. Young peoples' cancers incidence statistics [Internet]. 2016 [cited 2019 Jul 10]. Available from: <https://www.cancerresearchuk.org/health-professional/cancer-statistics/young-people-cancers/incidence>
2. National Institute of Health and Clinical Excellence. Guidance on Cancer Services Improving Outcomes in Children and Young People with Cancer National Institute for Health and Clinical Excellence [Internet]. Nice. 2005. 198 p. Available from: <https://www.nice.org.uk/guidance/csg7/resources/improving-outcomes-in-children-and-young-people-with-cancer-update-pdf-773378893>
3. Care Quality Commission., NHS Patient Survey Programme. 2018 Children and Young People's patient experience survey. Statistical Release. 2019;(November).
4. White B, Viner RM. Improving communication with adolescents. Arch Dis Child Educ Pract Ed. 2012;97(3):93–7.
5. Essig S, Steiner C, Kuehni CE, Weber H, Kiss A. Improving Communication in Adolescent Cancer Care: A Multiperspective Study. Pediatr Blood Cancer [Internet]. 2016;63(8):1423–30. Available from: [http://onlinelibrary.wiley.com/journal/10.1002/\(ISSN\)1545-5017](http://onlinelibrary.wiley.com/journal/10.1002/(ISSN)1545-5017)
6. Lea S, Gibson F, Taylor RM. Holistic Competence": How Is it Developed, Shared, and Shaped by Health Care Professionals Caring for Adolescents and Young Adults with Cancer? J Adolesc Young Adult Oncol. 2021;10(5):503–11.
7. Gibson F, Aldiss S, Fern LA, Phillips B, Gravestock H, Malik S, et al. Reporting the whole story: Analysis of the "out-of-scope" questions from the James Lind Alliance Teenage and Young Adult Cancer Priority Setting Partnership Survey. Health Expect. 2021;
8. Smith LAM, Critoph DJ, Hatcher HM. How Can Health Care Professionals Communicate Effectively with Adolescent and Young Adults Who Have Completed Cancer Treatment? A Systematic Review. J Adolesc Young Adult Oncol [Internet]. 2020 Jan 14; Available from: <https://doi.org/10.1089/jayao.2019.0133>

- 1
  - 2
  - 3
  - 4
  - 5
  - 6
  - 7
  - 8
  - 9
  - 10
  - 11
  - 12
  - 13
  - 14
  - 15
  - 16
  - 17
  - 18
  - 19
  - 20
  - 21
  - 22
  - 23
  - 24
  - 25
  - 26
  - 27
  - 28
  - 29
  - 30
  - 31
  - 32
  - 33
  - 34
  - 35
  - 36
  - 37
  - 38
  - 39
  - 40
  - 41
  - 42
  - 43
  - 44
  - 45
  - 46
  - 47
  - 48
  - 49
  - 50
  - 51
  - 52
  - 53
  - 54
  - 55
  - 56
  - 57
  - 58
  - 59
  - 60
9. Reid J, McKeaveney C, Martin P. Communicating with Adolescents and Young Adults about Cancer-Associated Weight Loss. *Curr Oncol Rep*. 2019;21(2):6.
10. Phillips CR, Haase JE. A Connectedness Primer for Healthcare Providers: Adolescents/Young Adult Cancer Survivors' Perspectives on Behaviors That Foster Connectedness during Cancer Treatment and the Resulting Positive Outcomes. *J Adolesc Young Adult Oncol* [Internet]. 2018;7(2):174–80. Available from: <http://www.liebertpub.com/products/product.aspx?pid=387>
11. Mellblom A V, Finset A, Korsvold L, Loge JH, Ruud E, Lie HC. Emotional concerns in follow-up consultations between paediatric oncologists and adolescent survivors: a video-based observational study. *Psychooncology* [Internet]. 2014 Dec;23(12):1365–72. Available from: <https://search.ebscohost.com/login.aspx?direct=true&AuthType=athens&db=cin20&AN=109768272&site=ehost-live>
12. Korsvold L, Mellblom AV, Finset A, Ruud E, Lie HC. A content analysis of emotional concerns expressed at the time of receiving a cancer diagnosis: An observational study of consultations with adolescent and young adult patients and their family members. *European Journal of Oncology Nursing* [Internet]. 2017;26:1–8. Available from: <https://search.ebscohost.com/login.aspx?direct=true&AuthType=sso&db=cin20&AN=120589318&site=ehost-live&custid=ns123475>
13. Ward A, Critoph D, Westacott R, Williams R, Dogra N. A collaboration on teaching and assessing triadic consultation skills. *PEC Innovation* [Internet]. 2022;1(October):100091. Available from: <https://doi.org/10.1016/j.pecinn.2022.100091>
14. van Staa AL. Unraveling triadic communication in hospital consultations with adolescents with chronic conditions: The added value of mixed methods research. *Patient Educ Couns*. 2011;82(3):455–64.
15. Cahill P, Papageorgiou A. Triadic communication in the primary care paediatric consultation: A review of the literature. *British Journal of General Practice*. 2007;57(544):904–11.
16. Maras M. Hidden in plain sight. *Int J Psychiatry Med*. 2022;57(6):481–5.
17. Young B, Dixon-woods M, Windridge KC, Heney D. Study of Patients and Parents. *Br Med J*. 2003;326(7384):305.
18. Wolff JL, Roter DL. Family presence in routine medical visits: A meta-analytical review. *Soc Sci Med* [Internet]. 2011;72(6):823–31. Available from: <http://dx.doi.org/10.1016/j.socscimed.2011.01.015>
19. Laidsaar-Powell RC, Butow PN, Bu S, Charles C, Gafni A, Lam WWT, et al. Physician-patient-companion communication and decision-making: A systematic review of triadic medical consultations. *Patient Educ Couns*. 2013;91(1):3–13.
20. Tates K, Meeuwesen L. Doctor-parent-child communication. A (re)view of the literature. *Soc Sci Med*. 2001;52(6):839–51.
21. Popay J, Roberts, H SA et al. Guidance on the Conduct of Narrative Synthesis in Systematic Reviews.
22. Petticrew M RH. Systematic Reviews in the social sciences. In: *Systematic reviews in the social sciences* [Internet]. Available from: <https://onlinelibrary.wiley.com/doi/book/10.1002/9780470754887>

- 1
- 2
- 3
- 4 23. Gough D. Weight of Evidence: a framework for the appraisal of the quality and
- 5 relevance of evidence. 2007 [cited 2023 Jul 2]; Available from:
- 6 <https://www.tandfonline.com/action/journalInformation?journalCode=rred20>
- 7 24. Barakat LP, Schwartz LA, Reilly A, Deatrick JA, Balis F. A Qualitative Study of Phase III
- 8 Cancer Clinical Trial Enrollment Decision-Making: Perspectives from Adolescents,
- 9 Young Adults, Caregivers, and Providers. *J Adolesc Young Adult Oncol*. 2014;3(1):3–
- 10 11.
- 11 25. Hart RI, Cameron DA, Cowie FJ, Harden J, Heaney NB, Rankin D, et al. The challenges
- 12 of making informed decisions about treatment and trial participation following a
- 13 cancer diagnosis: a qualitative study involving adolescents and young adults with
- 14 cancer and their caregivers. *BMC Health Serv Res*. 2020;20(1).
- 15 26. Ingersgaard MV, Tulstrup M, Larsen HB, Schmiegelow Kjeld AO - Ingersgaard MVO
- 16 <http://orcid.org/0000-0002-7037-2104>. A qualitative study of decision-making on
- 17 Phase III randomized clinical trial participation in paediatric oncology: Adolescents'
- 18 and parents' perspectives and preferences. *J Adv Nurs*. 2018;74(1):110–8.
- 19 27. Olsavsky AL, Theroux CI, Dattilo TM, Klosky JL, O'Brien SH, Quinn GP, et al. Family
- 20 communication about fertility preservation in adolescent males newly diagnosed with
- 21 cancer. *Pediatr Blood Cancer*. 2021;68(7).
- 22 28. Weaver MS, Baker JN, Gibson D V, Gattuso JS, Hinds PS, Gibson D V, et al. "Being a
- 23 good patient" during times of illness as defined by adolescent patients with cancer.
- 24 *Cancer* [Internet]. 2016 Jul 15;122(14):2224–33. Available from:
- 25 [http://onlinelibrary.wiley.com/journal/10.1002/\(ISSN\)1097-0142](http://onlinelibrary.wiley.com/journal/10.1002/(ISSN)1097-0142)
- 26 29. Bahrami M, Namnabati M, Mokarian F, Oujian P, Arbon P. Information-sharing
- 27 challenges between adolescents with cancer, their parents and health care providers:
- 28 a qualitative study. *Supportive Care in Cancer* [Internet]. 2017;25(5):1587–96.
- 29 Available from:
- 30 [https://search.ebscohost.com/login.aspx?direct=true&AuthType=athens&db=cin20&](https://search.ebscohost.com/login.aspx?direct=true&AuthType=athens&db=cin20&AN=122279626&site=ehost-live)
- 31 [AN=122279626&site=ehost-live](https://search.ebscohost.com/login.aspx?direct=true&AuthType=athens&db=cin20&AN=122279626&site=ehost-live)
- 32 30. Darabos K, Berger AJ, Barakat LP, Schwartz LA. Cancer-Related Decision-Making
- 33 Among Adolescents, Young Adults, Caregivers, and Oncology Providers. *Qual Health*
- 34 *Res*. 2021 Nov 1;31(13):2355–63.
- 35 31. Davies J, Kelly D, Hannigan B. "Life then", "life interrupted", "life reclaimed": The
- 36 fluctuation of agency in teenagers and young adults with cancer. *Eur J Oncol Nurs*.
- 37 2018;36(100885136):48–55.
- 38 32. Fern LA, Taylor RM, Whelan J, Pearce S, Grew T, Brooman K, et al. The Art of Age-
- 39 Appropriate Care. *Cancer Nurs* [Internet]. 2013;36(5):E27–38. Available from:
- 40 [https://search.ebscohost.com/login.aspx?direct=true&AuthType=athens&db=cin20&](https://search.ebscohost.com/login.aspx?direct=true&AuthType=athens&db=cin20&AN=110243702&site=ehost-live)
- 41 [AN=110243702&site=ehost-live](https://search.ebscohost.com/login.aspx?direct=true&AuthType=athens&db=cin20&AN=110243702&site=ehost-live)
- 42 33. Fourneret E. Breaking Bad News about Cancer to Adolescents and Young Adults: The
- 43 French Experience. *J Law Med* [Internet]. 2018 [cited 2021 Nov 22];25(2):530–7.
- 44 Available from: <https://pubmed.ncbi.nlm.nih.gov/29978652/>
- 45 34. Frederick NN, Mack JW. Adolescent patient involvement in discussions about
- 46 relapsed or refractory cancer with oncology clinicians. *Pediatr Blood Cancer*
- 47 [Internet]. 2018;65(4):1. Available from:
- 48 [https://search.ebscohost.com/login.aspx?direct=true&AuthType=athens&db=cin20&](https://search.ebscohost.com/login.aspx?direct=true&AuthType=athens&db=cin20&AN=128132562&site=ehost-live)
- 49 [AN=128132562&site=ehost-live](https://search.ebscohost.com/login.aspx?direct=true&AuthType=athens&db=cin20&AN=128132562&site=ehost-live)
- 50
- 51
- 52
- 53
- 54
- 55
- 56
- 57
- 58
- 59
- 60

- 1
- 2
- 3
- 4 35. Hong MK, Wilcox L, Machado D, Olson TA, Simoneaux SF. Care Partnerships: Toward
- 5 Technology to Support Teens' Participation in Their Health Care. *Proc SIGCHI Conf*
- 6 *Hum Factor Comput Syst* [Internet]. 2016 May 7 [cited 2018 Jun 2];2016:5337–49.
- 7 Available from: <http://www.ncbi.nlm.nih.gov/pubmed/28164178>
- 8
- 9 36. Mack JW, Fasciano KM, Block SD. Adolescent and Young Adult Cancer Patients'
- 10 Experiences With Treatment Decision-making. *Pediatrics*. 2019;143(5).
- 11
- 12 37. Patterson P, Millar B, Desille N, McDonald F. The Unmet Needs of Emerging Adults
- 13 With a Cancer Diagnosis A Qualitative Study. *Cancer Nurs*. 2012;35(3):E32–40.
- 14
- 15 38. Pennant S, Lee SC, Holm S, Triplett KN, Howe-Martin L, Campbell R, et al. The Role of
- 16 Social Support in Adolescent/Young Adults Coping with Cancer Treatment. *Children*
- 17 [Internet]. 2020;7(1):1–25. Available from:
- 18 [https://search.ebscohost.com/login.aspx?direct=true&AuthType=athens&db=cin20&](https://search.ebscohost.com/login.aspx?direct=true&AuthType=athens&db=cin20&AN=142468088&site=ehost-live)
- 19 [AN=142468088&site=ehost-live](https://search.ebscohost.com/login.aspx?direct=true&AuthType=athens&db=cin20&AN=142468088&site=ehost-live)
- 20
- 21 39. Pyke-Grimm KA, Franck LS, Halpern-Felsher B, Goldsby RE, Rehm RS. 3 Dimensions of
- 22 Treatment Decision Making in Adolescents and Young Adults With Cancer. *Cancer*
- 23 *Nurs* [Internet]. 2020 Nov;43(6):436–45. Available from:
- 24 [https://search.ebscohost.com/login.aspx?direct=true&AuthType=athens&db=cin20&](https://search.ebscohost.com/login.aspx?direct=true&AuthType=athens&db=cin20&AN=146822019&site=ehost-live)
- 25 [AN=146822019&site=ehost-live](https://search.ebscohost.com/login.aspx?direct=true&AuthType=athens&db=cin20&AN=146822019&site=ehost-live)
- 26
- 27 40. Pyke-Grimm KA, Franck LS, Halpern-Felsher B, Goldsby RE, Rehm RS. Day-to-Day
- 28 Decision Making by Adolescents and Young Adults with Cancer. *Journal of Pediatric*
- 29 *Hematology/Oncology Nursing* [Internet]. 2022;39(5):290–303. Available from:
- 30 [https://ovidsp.ovid.com/athens/ovidweb.cgi?T=JS&CSC=Y&NEWS=N&PAGE=fulltext&](https://ovidsp.ovid.com/athens/ovidweb.cgi?T=JS&CSC=Y&NEWS=N&PAGE=fulltext&D=medl&AN=35538622)
- 31 [D=medl&AN=35538622](https://ovidsp.ovid.com/athens/ovidweb.cgi?T=JS&CSC=Y&NEWS=N&PAGE=fulltext&D=medl&AN=35538622) <https://cambridge->
- 32 [primo.hosted.exlibrisgroup.com/openurl/44CAM/44CAM\\_services\\_page?sid=OVID:m](https://cambridge-)
- 33 [edline&id=pmid:35538622&id=doi:10.1177%2F27527530211068718&issn=](https://cambridge-)
- 34
- 35 41. Zarnegar S, Gosiengfiao Y, Rademaker A, Casey R, Albritton KH. Recall of Fertility
- 36 Discussion by Adolescent Female Cancer Patients: A Survey-Based Pilot Study. *J*
- 37 *Adolesc Young Adult Oncol* [Internet]. 2018 Apr;7(2):249–53. Available from:
- 38 <http://www.liebertpub.com/products/product.aspx?pid=387>
- 39
- 40 42. Viola A, Taggi-Pinto A, Sahler OJZ, Alderfer MA, Devine KA, Ed M, et al. Problem-
- 41 solving skills, parent-adolescent communication, dyadic functioning, and distress
- 42 among adolescents with cancer. *Pediatr Blood Cancer*. 2018;65(5).
- 43
- 44 43. Weaver MS, Baker JN, Gibson D V, Gattuso JS, Sykes AD, Hinds PS. Adolescents'
- 45 preferences for treatment decisional involvement during their cancer. *Cancer*
- 46 [Internet]. 2015;121(24):4416–24. Available from:
- 47 [http://onlinelibrary.wiley.com/journal/10.1002/\(ISSN\)1097-0142](http://onlinelibrary.wiley.com/journal/10.1002/(ISSN)1097-0142)
- 48
- 49 44. Sisk BA, Keenan M, Kaye EC, Baker JN, Mack JW, DuBois JM. Co-management of
- 50 communication and care in adolescent and young adult oncology. *Pediatr Blood*
- 51 *Cancer* [Internet]. 2022;69(10):e29813. Available from:
- 52 [https://ovidsp.ovid.com/athens/ovidweb.cgi?T=JS&CSC=Y&NEWS=N&PAGE=fulltext&](https://ovidsp.ovid.com/athens/ovidweb.cgi?T=JS&CSC=Y&NEWS=N&PAGE=fulltext&D=mexx&AN=35719025)
- 53 [D=mexx&AN=35719025](https://ovidsp.ovid.com/athens/ovidweb.cgi?T=JS&CSC=Y&NEWS=N&PAGE=fulltext&D=mexx&AN=35719025) <https://cambridge->
- 54 [primo.hosted.exlibrisgroup.com/openurl/44CAM/44CAM\\_services\\_page?sid=OVID:m](https://cambridge-)
- 55 [edline&id=pmid:35719025&id=doi:10.1002%2Fpbc.29813&issn=1545-500](https://cambridge-)
- 56
- 57 45. Sisk BA, Keenan M, Schulz GL, Kaye E, Baker JN, Mack JW, et al. Interdependent
- 58 functions of communication with adolescents and young adults in oncology. *Pediatr*
- 59 *Blood Cancer* [Internet]. 2022; Available from:
- 60 [http://onlinelibrary.wiley.com/journal/10.1002/\(ISSN\)1545-5017](http://onlinelibrary.wiley.com/journal/10.1002/(ISSN)1545-5017)

- 1
  - 2
  - 3
  - 4
  - 5
  - 6
  - 7
  - 8
  - 9
  - 10
  - 11
  - 12
  - 13
  - 14
  - 15
  - 16
  - 17
  - 18
  - 19
  - 20
  - 21
  - 22
  - 23
  - 24
  - 25
  - 26
  - 27
  - 28
  - 29
  - 30
  - 31
  - 32
  - 33
  - 34
  - 35
  - 36
  - 37
  - 38
  - 39
  - 40
  - 41
  - 42
  - 43
  - 44
  - 45
  - 46
  - 47
  - 48
  - 49
  - 50
  - 51
  - 52
  - 53
  - 54
  - 55
  - 56
  - 57
  - 58
  - 59
  - 60
46. Barlevy D, Wangmo T, Ash S, Elger BS, Ravitsky V. Oncofertility decision making: Findings from Israeli adolescents and parents. *J Adolesc Young Adult Oncol* [Internet]. 2019;8(1):74–83. Available from: <https://www.proquest.com/scholarly-journals/oncofertility-decision-making-findings-israeli/docview/2426222863/se-2?accountid=47868>
47. Sawyer SM, McNeil R, Thompson K, Orme LM, McCarthy MAOSSM; O <http://orcid.org/0000-0002-9095-358X>, Sawyer SM, et al. Developmentally appropriate care for adolescents and young adults with cancer: how well is Australia doing? *Supportive Care in Cancer* [Internet]. 2019;27(5):1783–92. Available from: <http://link.springer.de/link/service/journals/00520/index.htm>
48. Ellis SJ, Wakefield CE, McLoone JK, Robertson EG, Cohn RJ. Fertility concerns among child and adolescent cancer survivors and their parents: A qualitative analysis. *J Psychosoc Oncol*. 2016;34(5):347–62.
49. Ananth P, Mun S, Reffat N, Li R, Sedghi T, Avery M, et al. A Stakeholder-Driven Qualitative Study to Define High Quality End-of-Life Care for Children With Cancer. *J Pain Symptom Manage* [Internet]. 2021;62(3):492–502. Available from: <https://ovidsp.ovid.com/athens/ovidweb.cgi?T=JS&CSC=Y&NEWS=N&PAGE=fulltext&D=med19&AN=33556497> [https://cambridge-primo.hosted.exlibrisgroup.com/openurl/44CAM/44CAM\\_services\\_page?sid=OVID:medline&id=pmid:33556497&id=doi:10.1016%2Fj.jpainsymman.2021.01](https://cambridge-primo.hosted.exlibrisgroup.com/openurl/44CAM/44CAM_services_page?sid=OVID:medline&id=pmid:33556497&id=doi:10.1016%2Fj.jpainsymman.2021.01).
50. Cicero-Oneto CE, Valdez-Martinez E, Bedolla M. Decision-making on therapeutic futility in Mexican adolescents with cancer: a qualitative study. *BMC Med Ethics* [Internet]. 2017;18:74. Available from: <https://search.ebscohost.com/login.aspx?direct=true&AuthType=athens&db=cin20&AN=127010047&site=ehost-live>
51. Friebert S, Grosseohme DH, Baker JN, Needle J, Thompkins JD, Cheng YI, et al. Congruence Gaps Between Adolescents With Cancer and Their Families Regarding Values, Goals, and Beliefs About End-of-Life Care. *JAMA Netw Open* [Internet]. 2020 May 19;e205424–e205424. Available from: <https://search.ebscohost.com/login.aspx?direct=true&AuthType=athens&db=cin20&AN=143389091&site=ehost-live>
52. Jacobs S, Perez J, Cheng YI, Sill A, Wang J, Lyon ME. Adolescent end of life preferences and congruence with their parents' preferences: Results of a survey of adolescents with cancer. *Pediatr Blood Cancer* [Internet]. 2015;62(4):710–4. Available from: <https://search.ebscohost.com/login.aspx?direct=true&AuthType=athens&db=cin20&AN=109777063&site=ehost-live>
53. Lyon ME, Jacobs S, Briggs L, Cheng YI, Wang J. Family-centered advance care planning for teens with cancer. *JAMA Pediatr*. 2013;167(5):460–7.
54. Wu LM, Chiou SS, Lin PC, Liao YM, Su HL. Decisional conflicts, anxiety, and perceptions of shared decision-making in cancer treatment trajectory among adolescents with cancer: A longitudinal study. *Journal of Nursing Scholarship*. 2022;54(5):589–97.
55. Mack JW, Fasciano KM, Block SD. Adolescent and Young Adult Cancer Patients' Experiences With Treatment Decision-making. *Pediatrics*. 2019;143(5).
56. Martins A, Alvarez-Galvez J, Fern LA, Vindrola-Padros C, Barber JA, Gibson F, et al. The BRIGHTLIGHT National Survey of the Impact of Specialist Teenage and Young Adult

- Cancer Care on Caregivers' Information and Support Needs. *Cancer Nurs*. 2021;44(3):235–43.
57. Dalton JM. Development and testing of the theory of collaborative decision-making in nursing practice for triads. *J Adv Nurs*. 2003;41(1):22–33.
58. Grinyer A. Young people living with cancer: implications for policy and practice. Open University Press; 2007. 182 p.
59. Moules NJ, Laing CM, Estefan A, Schulte F, Guilcher GMT. "Family Is Who They Say They Are"(a): Examining the Effects of Cancer on the Romantic Partners of Adolescents and Young Adults. *J Fam Nurs*. 2018;24(3):374–404.
60. Silva M, Barretta F, Luksch R, Terenziani M, Casanova M, Spreafico F, et al. Adolescents with cancer on privacy: Fact-finding survey on the need for confidentiality and space. *Tumori*. 2021 Oct 1;107(5):452–7.
61. KM B, Smith A, Schmidt S, TH K, Zebrack B, CF L, et al. Positive and negative psychosocial impact of being diagnosed with cancer as an adolescent or young adult. *Cancer (0008543X)* [Internet]. 2012 Oct 15;118(20):5155–62. Available from: <https://search.ebscohost.com/login.aspx?direct=true&AuthType=athens&db=cin20&AN=104372613&site=ehost-live>
62. Pyke-Grimm KA, Franck LS, Patterson Kelly K, Halpern-Felsher B, Goldsby RE, Kleiman A, et al. Treatment Decision-Making Involvement in Adolescents and Young Adults With Cancer. *Oncol Nurs Forum* [Internet]. 2019;46(1):E22–37. Available from: <https://search.ebscohost.com/login.aspx?direct=true&AuthType=athens&db=cin20&AN=133553348&site=ehost-live>
63. Davies J. The experience and role of partners in helping to meet the support needs of adolescents and young adults with cancer. *Journal of Advanced Nursing (John Wiley & Sons, Inc)* [Internet]. 2019 May;75(5):1119–25. Available from: <https://search.ebscohost.com/login.aspx?direct=true&AuthType=athens&db=cin20&AN=135934208&site=ehost-live>
64. Iannarino NT. "It's My Job Now, I Guess": Biographical disruption and communication work in supporters of young adult cancer survivors. *Commun Monogr* [Internet]. 2018;85(4):491–514. Available from: <https://doi.org/10.1080/03637751.2018.1468916>
65. Coyne I, Amory A, Gibson F, Kiernan G. Information-sharing between healthcare professionals, parents and children with cancer: More than a matter of information exchange. *Eur J Cancer Care (Engl)*. 2016;25(1):141–56.
66. de Vries MC, Wit JM, Engberts DP, Kaspers GJL, van Leeuwen E. Pediatric Oncologists' Attitudes Towards Involving Adolescents in Decision-Making Concerning Research Participation. *Pediatr Blood Cancer*. 2010;55(1):123–8.
67. Frederick NN, Bingen K, Bober SL, Cherven B, Xu X, Quinn GP, et al. Pediatric oncology clinician communication about sexual health with adolescents and young adults: A report from the children's oncology group. *Cancer Med* [Internet]. 2021;10(15):5110–9. Available from: <https://ovidsp.ovid.com/athens/ovidweb.cgi?T=JS&CSC=Y&NEWS=N&PAGE=fulltext&D=med20&AN=34128352> [https://cambridge-primo.hosted.exlibrisgroup.com/openurl/44CAM/44CAM\\_services\\_page?sid=OVID:medline&id=pmid:34128352&id=doi:10.1002%2Fcam4.4077&issn=2045-76](https://cambridge-primo.hosted.exlibrisgroup.com/openurl/44CAM/44CAM_services_page?sid=OVID:medline&id=pmid:34128352&id=doi:10.1002%2Fcam4.4077&issn=2045-76)

- 1
- 2
- 3
- 4 68. General Medical Council. Guidance for All Doctors. 0-18 Years: Guidance for All
- 5 Doctors [Internet]. 2018;11. Available from: [https://www.gmc-uk.org/ethical-](https://www.gmc-uk.org/ethical-guidance/ethical-guidance-for-doctors/0-18-years/making-decisions#paragraph-29)
- 6 [guidance/ethical-guidance-for-doctors/0-18-years/making-decisions#paragraph-29](https://www.gmc-uk.org/ethical-guidance/ethical-guidance-for-doctors/0-18-years/making-decisions#paragraph-29)
- 7 69. British Medical Association. Children and young people toolkit A toolkit for doctors.
- 8 BMA.org.uk [Internet]. 2021; Available from: <https://www.bma.org.uk>
- 9 70. Gillick T. Gillick competence What is Gillick Here ' s what you need to know about
- 10 capacity and The Gillick case. 2022;
- 11 71. Joffe S, Fernandez C V., Pentz RD, Ungar DR, Mathew NA, Turner CW, et al. Involving
- 12 children with cancer in decision-making about research participation. *Journal of*
- 13 *Pediatrics*. 2006;149(6).
- 14 72. Mårtenson EK, Fågerskiöld AM. A review of children's decision-making competence in
- 15 health care. *J Clin Nurs*. 2008;17(23):3131–41.
- 16 73. Department for Constitutional Affairs. Mental Capacity Act 2005: Code of Practice.
- 17 *Mental Capacity Act 2005: Code of Practice*. 2007;1–301.
- 18 74. Lea S, Gibson F, Taylor RM. Holistic Competence": How Is it Developed, Shared, and
- 19 Shaped by Health Care Professionals Caring for Adolescents and Young Adults with
- 20 Cancer? *J Adolesc Young Adult Oncol*. 2021;10(5):503–11.
- 21 75. Essig S, Steiner C, Kuehni CE, Weber H, Kiss A. Improving Communication in
- 22 Adolescent Cancer Care: A Multiperspective Study. *Pediatr Blood Cancer*.
- 23 2016;63(8):1423–30.
- 24 76. Essig S, Steiner C, Kühne T, Kremens B, Langewitz W, Kiss A. Communication Skills
- 25 Training for Professionals Working with Adolescent Patients with Cancer Based on
- 26 Participants' Needs: A Pilot. <https://home.liebertpub.com/jayao>. 2019 Jun
- 27 4;8(3):354–62.
- 28 77. Coad J, Smith J, Pontin D, Gibson F. Consult, Negotiate, and Involve: Evaluation of an
- 29 Advanced Communication Skills Program for Health Care Professionals. *Journal of*
- 30 *Pediatric Oncology Nursing*. 2018 Jul 1;35(4):296–307.
- 31 78. Ruhe KM, Badarau DO, Brazzola P, Hengartner H, Elger BS, Wangmo T, et al.
- 32 Participation in pediatric oncology: views of child and adolescent patients.
- 33 *Psychooncology*. 2016;25(9):1036–42.
- 34 79. Blackmore A, Kasfiki EV, Purva M. Simulation-based education to improve
- 35 communication skills: A systematic review and identification of current best practice.
- 36 *BMJ Simul Technol Enhanc Learn*. 2018;4(4):159–64.
- 37 80. Mahoney P, Macfarlane S, Ajjawi R. A qualitative synthesis of video feedback in higher
- 38 education. *Teaching in Higher Education* [Internet]. 2019;24(2):157–79. Available
- 39 from: <https://doi.org/10.1080/13562517.2018.1471457>
- 40 81. Smith S, Mooney S, Cable M, Taylor RM. THE BLUEPRINT OF CARE for teenagers and
- 41 young adults with cancer Second edition. 2016; Available from:
- 42 [https://www.teenagecancertrust.org/sites/default/files/BlueprintOfCare\\_2ndEdition.](https://www.teenagecancertrust.org/sites/default/files/BlueprintOfCare_2ndEdition.pdf)
- 43 pdf
- 44
- 45
- 46
- 47
- 48
- 49
- 50
- 51
- 52
- 53
- 54
- 55
- 56
- 57
- 58
- 59
- 60

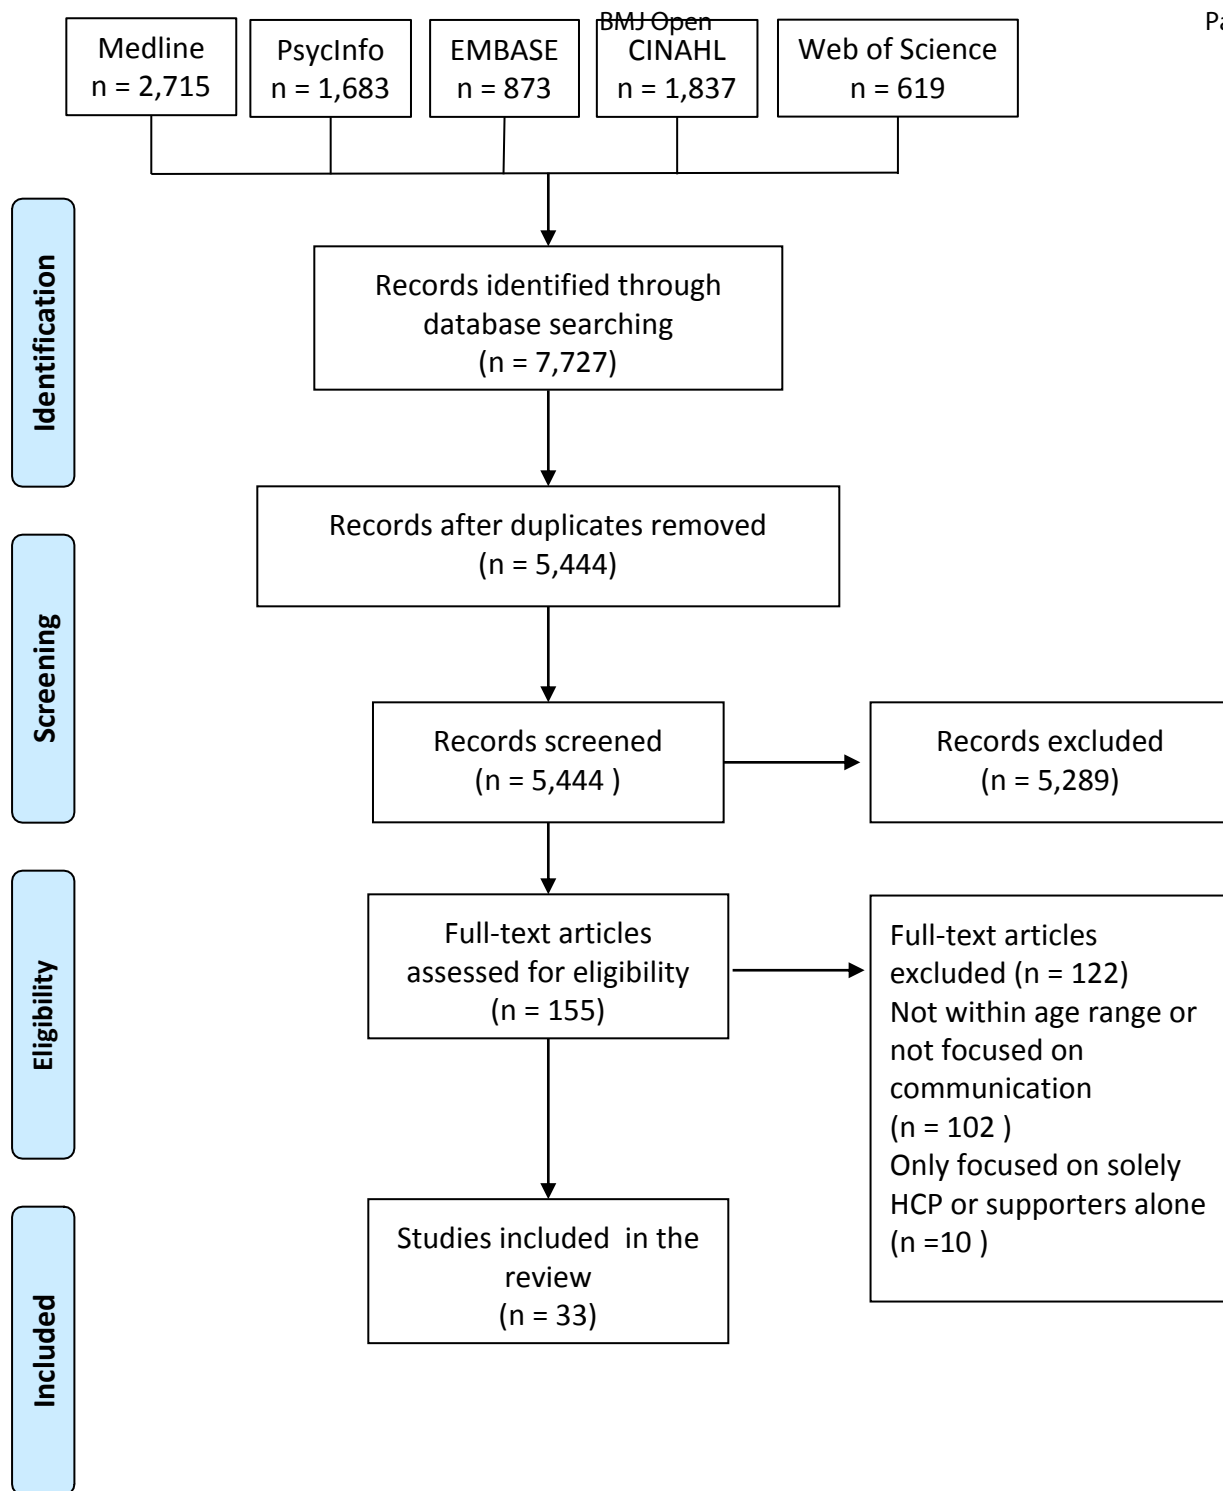



Table 2. Summary of Articles

| <i>First author (year)</i> | <i>Title</i>                                                                                                                       | <i>Setting</i>     | <i>Study Type - analysis method<br/>Data collection</i>                                                               | <i>Focus</i>                                                                               | <i>Participant Characteristics<sup>‡</sup></i>                                                                                                             | <i>Key findings</i>                                                                                                                                                                                                                                                                                                                                                                                                                                                                                                                                          |
|----------------------------|------------------------------------------------------------------------------------------------------------------------------------|--------------------|-----------------------------------------------------------------------------------------------------------------------|--------------------------------------------------------------------------------------------|------------------------------------------------------------------------------------------------------------------------------------------------------------|--------------------------------------------------------------------------------------------------------------------------------------------------------------------------------------------------------------------------------------------------------------------------------------------------------------------------------------------------------------------------------------------------------------------------------------------------------------------------------------------------------------------------------------------------------------|
| Ananth (2021)              | A Stakeholder-Driven Qualitative Study to Define High Quality End-Of-Life Care for Children with Cancer                            | USA Multicentre    | Qualitative - <u>thematic analysis</u><br><br><i>Semi-structured interviews and focus groups.</i>                     | To explore end of life care (EOLC) priorities for children with cancer and their families. | <u>54 participants:</u><br><b>10 AYACs (age range: 17-23 years)</b><br>25 parents (including 12 bereaved parents)<br>19 healthcare professionals           | Important to have direct communication with the child or young person regarding decision-making.<br>Interdisciplinary care with integrated teams is vital for high quality end of life care. Continuity of healthcare professionals was positive.<br>AYACs would prefer to die at home but family and healthcare professionals may be hesitant.                                                                                                                                                                                                              |
| Bahrami (2017)             | Information Sharing Challenges Between Adolescents with Cancer, their Parents and Health Care Providers: A Qualitative Study       | Iran Single centre | Qualitative descriptive-exploratory study - <u>grounded theory analysis</u><br><br><i>Semi-structured interviews.</i> | Information sharing between AYACs, parents and health professionals.                       | <u>33 participants:</u><br><b>12 AYACs (age range at interview: 15-20 years, within 1 year of diagnosis)</b><br>6 supporters<br>6 healthcare professionals | AYACs feel they are excluded from information-sharing sessions between parents and healthcare professionals. This leads to disaffiliation, confusion and AYACs seek information from ‘inferior’ sources.<br>Parents were often the first receivers of information allowing them to act as gatekeepers controlling information to flow to AYACs. Parents may want to shield AYACs from bad news.<br>Trust and honesty are the foundations of effective communication between AYACs and healthcare professionals. AYACs reacted negatively towards dishonesty. |
| Barakat (2014)             | A Qualitative Study of Phase III Cancer Clinical Trial Enrollment Decision Making Perspectives from AYAC, Caregivers and Providers | USA Single centre  | Qualitative - <u>thematic analysis</u><br><br><i>Semi-structured interviews.</i>                                      | Clinical trial enrollment.                                                                 | <u>40 participants:</u><br><b>13 AYACs (age range: 15-21 years)</b><br>16 supporters<br>11 healthcare professionals                                        | Four patterns of decision-making patterns identified:<br>1. AYAC abdicates to caregiver,<br>2. Caregiver based and AYAC approved,<br>3. Collaborative,<br>4. AYAC in charge of decision-making.<br>Caregivers perceived AYAC to be in charge of decision making most of the time whereas the AYACs felt that “AYAC abdicates to carer” was the most common form of decision making.<br>Distress and poor health limited AYAC involvement in the decision.<br>Developmental and emotional maturity facilitated involvement.                                   |

|                                                                                                                                                                                              |                            |                                                                                                                |                         |                                                                                        |                                                                                                                                     |                                                                                                                                   |                                                                                                                                                                                                                                                                                                                                                                                                                                                                                                                                                                                                                                                                                                                               |
|----------------------------------------------------------------------------------------------------------------------------------------------------------------------------------------------|----------------------------|----------------------------------------------------------------------------------------------------------------|-------------------------|----------------------------------------------------------------------------------------|-------------------------------------------------------------------------------------------------------------------------------------|-----------------------------------------------------------------------------------------------------------------------------------|-------------------------------------------------------------------------------------------------------------------------------------------------------------------------------------------------------------------------------------------------------------------------------------------------------------------------------------------------------------------------------------------------------------------------------------------------------------------------------------------------------------------------------------------------------------------------------------------------------------------------------------------------------------------------------------------------------------------------------|
| 1<br>2<br>3<br>4<br>5<br>6<br>7<br>8<br>9<br>10<br>11<br>12<br>13<br>14<br>15                                                                                                                | Barlevy<br>(2019)          | Oncofertility<br>decision making:<br>findings from<br>Israeli adolescents<br>and parents                       | Israel<br>Single centre | Qualitative-<br>thematic analysis<br><br><i>semi-structured<br/>interviews</i>         | To understand<br>adolescent<br>oncofertility<br>decision making<br>in Israel, from<br>perspectives of<br>parents and<br>adolescents | <u>35 participants</u><br><b>16 AYACs (age range 12-<br/>16 years)</b><br>19 parents                                              | As in other cultural contexts, Israeli adolescents<br>and parents demonstrate multifaceted<br>decision making with respect to oncofertility.<br>A significant finding from this study<br>suggests that health professional shy from<br>discussing posthumous planning of<br>cryopreserved materials with adolescent<br>cancer patients and their parents. 5 out of 16<br>AYAs felt that the decision was not theirs and<br>that it was instead the parents' or the physicians'<br>to make. Some parents felt that the decision was<br>made by the clinician - explicit or implicit<br>recommendations from the clinician strongly<br>influence decision making. No decisional regret<br>expressed by any members of the dyad. |
| 16<br>17<br>18<br>19<br>20<br>21<br>22<br>23<br>24<br>25<br>26<br>27<br>28<br>29<br>30<br>31<br>32<br>33<br>34<br>35<br>36<br>37<br>38<br>39<br>40<br>41<br>42<br>43<br>44<br>45<br>46<br>47 | Cicero-<br>Oneto<br>(2017) | Decision-making<br>on therapeutic<br>futility in Mexican<br>adolescents with<br>cancer: a<br>qualitative study | Mexico<br>Multicentre   | Qualitative -<br><u>thematic analysis</u><br><br><i>Semi-structured<br/>interviews</i> | Decision making<br>on therapeutic<br>futility                                                                                       | <u>32 Participants</u><br>13 paediatric oncologists<br>13 parents or primary carers<br><b>6 AYACs (age range 13-18<br/>years)</b> | Four themes were identified<br>1. flow of information to inform decision<br>making<br>2. disclosure of prognosis<br>3. decision maker and stakeholder involved<br>in decision making<br>4. barriers and facilitators to decision<br>making<br><br>Differing values and agendas. The parents valued<br>messages to “life the spirits” whereas the AYACs<br>values honesty from the healthcare professionals<br>Gatekeeping of information.<br>Theme of “deference to authority”                                                                                                                                                                                                                                                |

1  
2  
3  
4  
5  
6  
7  
8  
9  
10  
11  
12  
13  
14  
15  
16  
17  
18  
19  
20  
21  
22  
23  
24  
25  
26  
27  
28  
29  
30  
31  
32  
33  
34  
35  
36  
37  
38  
39  
40  
41  
42  
43  
44  
45  
46  
47

|                |                                                                                                                        |                            |                                                                                                        |                                                                                           |                                                                                                                                                                                                                                                             |                                                                                                                                                                                                                                                                                                                                                                                                                                                                                                                                                                                                                                                                                                                                                               |
|----------------|------------------------------------------------------------------------------------------------------------------------|----------------------------|--------------------------------------------------------------------------------------------------------|-------------------------------------------------------------------------------------------|-------------------------------------------------------------------------------------------------------------------------------------------------------------------------------------------------------------------------------------------------------------|---------------------------------------------------------------------------------------------------------------------------------------------------------------------------------------------------------------------------------------------------------------------------------------------------------------------------------------------------------------------------------------------------------------------------------------------------------------------------------------------------------------------------------------------------------------------------------------------------------------------------------------------------------------------------------------------------------------------------------------------------------------|
| Darabos (2021) | Cancer Related Decision Making Among AYAC, Care Givers and Oncology Providers                                          | USA<br>Single centre       | Qualitative – <u>content analysis with hypothesis coding</u><br><br><i>Semi-structured interviews.</i> | Decision-making and triadic communication                                                 | <u>30 Participants:</u><br><b>11 AYACs (age range: 15-24 years)</b><br>11 supporters<br>8 healthcare professionals                                                                                                                                          | Four decision-making patterns were identified:<br>1. AYAC driven,<br>2. Collaborative,<br>3. Deferral to parents,<br>4. Provider-based, AYA/Caregiver-approved.<br>Collaborative decision-making and AYAC-driven decisions were most commonly described. There was recognition that some decision-making was day/context dependent. AYACs were more likely to drive decisions regarding supportive care than treatment related decisions. AYACs and caregivers explained how cognitive and emotional processes influenced cancer related decisions. Emotional coping was more common than problem-based coping. Direct and honest communication contributes to a stronger relationship. Individuality is key along with flexibility. Time alone is important. |
| Davies (2019)  | ‘Life then’, ‘life interrupted’, ‘life reclaimed’: the fluctuation of agency in teenagers and young adults with cancer | UK<br>single centre        | qualitative - thematic analysis<br><br><i>case studies - multiple interviews</i>                       | Fluctuation of agency across time and between cases                                       | <u>22 participants</u><br><b>5 AYACs (16-24 years)</b><br><b>5 parents carers</b> (2 fathers, 3 mothers, 1 couple),<br>5 healthcare professionals (4 nurses and 1 oncology consultant)<br>5 other supporters (1 boyfriend, 1 girlfriend, 1 aunt, 2 friends) | Agency fluctuates over time within cases and between cases. Agency can fluctuate between personal, proxy and collective perspectives. Personal agency is high prior to diagnosis, decreases after diagnosis and is reclaimed after treatment.                                                                                                                                                                                                                                                                                                                                                                                                                                                                                                                 |
| Ellis (2016)   | Fertility concerns among child and adolescent survivors and parents: a qualitative study                               | Australia<br>single centre | Qualitative semi-structured telephone interviews                                                       | Fertility related themes with AYACs who are recently off treatment and with their parents | <u>97 participants from 45 families</u><br><b>19 AYACs (age range 7-17 at diagnosis, mean age 13.3)</b><br>44 mothers and 34 fathers                                                                                                                        | Both parents and AYACs are concerned about the potential impacts on fertility of treatment. Poor doctor-patient communication was reported and conversations about fertility were frequently interrupted to discuss illness and treatment. These fertility discussions were not then continues once the AYAC was off treatment                                                                                                                                                                                                                                                                                                                                                                                                                                |

|                                                                                                                                                                      |              |                                                                             |                                                                   |                                                                                                                                  |                                                                               |                                                                                                                 |                                                                                                                                                                                                                                                                                                                                                                                                                                                                                                                                                                                                                                                                                                                                          |
|----------------------------------------------------------------------------------------------------------------------------------------------------------------------|--------------|-----------------------------------------------------------------------------|-------------------------------------------------------------------|----------------------------------------------------------------------------------------------------------------------------------|-------------------------------------------------------------------------------|-----------------------------------------------------------------------------------------------------------------|------------------------------------------------------------------------------------------------------------------------------------------------------------------------------------------------------------------------------------------------------------------------------------------------------------------------------------------------------------------------------------------------------------------------------------------------------------------------------------------------------------------------------------------------------------------------------------------------------------------------------------------------------------------------------------------------------------------------------------------|
| 1<br>2<br>3<br>4<br>5<br>6<br>7<br>8<br>9<br>10<br>11<br>12<br>13<br>14<br>15<br>16<br>17<br>18<br>19                                                                | Essig (2016) | Improving Communication in Adolescent Cancer Care: A Multiperspective Study | Germany, Austria, Switzerland<br><br>Number of centres not stated | Qualitative – <u>inductive thematic analysis</u><br><br><i>Focus groups.</i>                                                     | Explore effective communication with AYACs for communication skills training. | <u>54 participants:</u><br><b>16 AYACs (age range: 13-19 years)</b><br>8 parents<br>30 healthcare professionals | Decision-making can cause conflict when adolescents are cognitively mature but legally lack the ability to make decisions.<br>AYACs feel a loss of autonomy.<br>Age-appropriate environments are important.<br>Effective communication differs depending on the type of professional (i.e., doctor vs nurse)<br>Adolescents negatively affect communication when:<br>1. They are indifferent.<br>2. Their priorities conflict with treatment<br>3. They conflict with parents.<br>Healthcare professionals negatively affect communication when:<br>1. They don't treat the adolescent in an age-appropriate way.<br>2. They don't take the adolescent seriously.<br>3. They give too much information or withhold important information |
| 20<br>21<br>22<br>23<br>24<br>25<br>26<br>27<br>28<br>29<br>30<br>31<br>32<br>33<br>34<br>35<br>36<br>37<br>38<br>39<br>40<br>41<br>42<br>43<br>44<br>45<br>46<br>47 | Fern (2013)  | The Art of Age-Appropriate Care                                             | UK<br>Number of centres not stated                                | Qualitative – <u>thematic analysis</u><br><br><i>Peer-to-peer interviews, field notes and spider diagrams from focus groups.</i> | Review a conceptual model of AYACs' cancer care experiences.                  | <u>11 participants:</u><br><b>11 AYACs (age range: 13-25 years)</b>                                             | Young people must be kept at the centre of interactions in recognition of their stated needs:<br>1. Engagement.<br>2. Individually tailored information.<br>3. Support unproxied by parents/family.<br>AYACs did not want information to be directed at parents but at them.<br>AYACs found it embarrassing when sensitive information was revealed in the presence of their parents.<br>Lack of continuity of healthcare professionals leads to AYACs dissatisfaction and irritation having to repeat their cancer story.                                                                                                                                                                                                               |

1  
2  
3  
4  
5  
6  
7  
8  
9  
10  
11  
12  
13  
14  
15  
16  
17  
18  
19  
20  
21  
22  
23  
24  
25  
26  
27  
28  
29  
30  
31  
32  
33  
34  
35  
36  
37  
38  
39  
40  
41  
42  
43  
44  
45  
46  
47

|                   |                                                                                                                               |                       |                                                                        |                                                                                                                          |                                                                                                                                                                                        |                                                                                                                                                                                                                                                                                                                                                                                                                                                                                                                                                                                                                                                                                                                                                                                                                                                                           |
|-------------------|-------------------------------------------------------------------------------------------------------------------------------|-----------------------|------------------------------------------------------------------------|--------------------------------------------------------------------------------------------------------------------------|----------------------------------------------------------------------------------------------------------------------------------------------------------------------------------------|---------------------------------------------------------------------------------------------------------------------------------------------------------------------------------------------------------------------------------------------------------------------------------------------------------------------------------------------------------------------------------------------------------------------------------------------------------------------------------------------------------------------------------------------------------------------------------------------------------------------------------------------------------------------------------------------------------------------------------------------------------------------------------------------------------------------------------------------------------------------------|
| Fournieret (2018) | Breaking bad news about cancer to adolescents and young adults: the french experience                                         | France<br>Multicentre | qualitative semi-structured interviews                                 | Explore the effectiveness and implementation of the French announcement protocol in 7 french paediatric oncology centres | <u>90 participants</u><br><b>27 AYACs (21 were 14-17 and 6 were 18-22)</b><br>30 parents (16 mothers, 5 fathers, 9 parents together at the appointment)<br>33 healthcare professionals | Parents and AYACs have different needs - both of which need to be accounted for when breaking bad news. Awkward and premature announcements were noted<br>The announcement consultation – young patients were never alone when informed of their disease; either with parents (n=31) (parents were informed before their child 10 out of 31 times - this was motivated by a compassionate goal of preparing the parents so they can better support the child when the bad news is broken) or close family member/sibling or boyfriend or girlfriend (n=2).<br>Some parents withheld info and some AYACs preferred parents not to know their diagnosis<br>Asymmetry in the triad discussed - but the key quality needed in the triad is mutual trust<br>HCP found parental presence helpful in the study. HCPs should show empathy (no neutrality) and attention to detail |
| Frederick (2018)  | Adolescent Patient Involvement in Discussions About Relapsed or Refractory Cancer with Oncology Clinicians.                   | USA<br>Single centre  | Qualitative – content analysis<br><br><i>Audiotaped conversations.</i> | Breaking bad news of relapsed or refractory cancer.                                                                      | <u>75 participants:</u><br><b>11 AYACs (age range: 12.6-17.5 years)</b><br>44 supporters<br>20 healthcare professionals                                                                | Adolescent patients’ involvement in conversations about relapsed or refractory cancer is limited. Adolescents were accompanied by one (27%) two (64%) or more than two (18%) family members in the discussion.<br>Adolescents spoke 3.5% of words compared to 66.9% clinicians and 30% parents.<br>No conversations included instances in which the clinicians’ asked adolescents for their communication preferences or desired role in decision-making.                                                                                                                                                                                                                                                                                                                                                                                                                 |
| Friebert (2020)   | Congruence gaps between adolescents with cancer and their families regarding values, goals and beliefs about end-of-life care | USA<br>multicentre    | <i>Qualitative cross-sectional study</i>                               | End of life care                                                                                                         | 126 parent-AYAC dyads<br>AYACs (14-20 years, mean age 16.9)                                                                                                                            | Young people wanted early information (86%) but only 39% families knew this. Families understanding of what was important to their adolescents when dealing with their own dying was excellent for wanting honest answers from their physician and understanding treatment choices but poor for dying a natural death and being off machines that extend life, if dying.<br>Parents do not know what AYACs want at the end of life                                                                                                                                                                                                                                                                                                                                                                                                                                        |

|                                                                         |                    |                                                                                                                                                                                        |                   |                                                                                            |                                                                                                                                                        |                                                                                                                                                                                                   |                                                                                                                                                                                                                                                                                                                                                                                                                                                                                                                                                                         |
|-------------------------------------------------------------------------|--------------------|----------------------------------------------------------------------------------------------------------------------------------------------------------------------------------------|-------------------|--------------------------------------------------------------------------------------------|--------------------------------------------------------------------------------------------------------------------------------------------------------|---------------------------------------------------------------------------------------------------------------------------------------------------------------------------------------------------|-------------------------------------------------------------------------------------------------------------------------------------------------------------------------------------------------------------------------------------------------------------------------------------------------------------------------------------------------------------------------------------------------------------------------------------------------------------------------------------------------------------------------------------------------------------------------|
| 1<br>2<br>3<br>4<br>5<br>6<br>7<br>8<br>9<br>10<br>11<br>12<br>13<br>14 | Hart (2020)        | The Challenges of Making Informed Decisions About Treatment and Trial Participation Following Cancer: A Qualitative Study with Adolescent and Young Adults with Cancer and Care Givers | UK<br>Multicentre | Qualitative – thematic analysis<br><br><i>Semi-structured interviews.</i>                  | Shared decision-making – primary treatment and trial participation – at diagnosis.                                                                     | <u>33 participants:</u><br><b>18 AYACs (age range: 16-24 years)</b><br>15 supporters                                                                                                              | AYACs struggled to process information around diagnosis, exacerbated by symptom burden, emotions, and the fast pace of clinical activity. Some AYACs disengaged from conversation topics which were distressing. There are limited options for ‘real’ decision-making at diagnosis. However, many preferred this when they were already overwhelmed by emotions/symptoms. For trial enrollment, many AYACs allowed themselves to be steered by the recommendation of the healthcare professional who recruited them, thinking they were acting in their best interests. |
| 15<br>16<br>17<br>18<br>19<br>20<br>21<br>22<br>23<br>24<br>25          | Hong (2016)        | Care Partnerships: toward technology to support teen’s participation in their health care                                                                                              | US<br>multicentre | Qualitative semi-structured interviews and observations                                    | To investigate how technology can support the partnerships between AYACs, parents and clinicians when the AYAC is experiencing complex chronic illness | <u>33 interviews.</u><br><b>15 with AYACs (13 of whom had cancer. age range 13-17)</b><br>15 parents (10 mothers, 1 fathers, 1 aunt and 2 fathers and mothers together)<br>8 clinician caregivers | Participants faced challenges concerning:<br>1) Teens’ limited participation in their care<br>2) communicating emotionally sensitive information<br>3) managing physical and emotional responses<br>Time alone with clinicians was important. Mutual protectionism or the need to “emotionally protect each other” was prevalent.                                                                                                                                                                                                                                       |
| 26<br>27<br>28<br>29<br>30<br>31<br>32<br>33<br>34<br>35<br>36          | Ingersgaard (2018) | A qualitative study on decision-making on Phase III randomized clinical trial participation in paediatric oncology: adolescents’ and parents’ perspectives and preferences             | Denmark           | qualitative exploratory study - in-depth semi-structured interviews with thematic analysis | To explore patients’ and AYACs’ motifs for accepting/ declining participation in the AL2008 trial and adolescents’ involvement in decision making      | <u>16 participants</u><br><b>5 AYACs (age range 12-16)</b><br>6 parents of AYACs<br>5 parents of children aged 3-10 years with cancer                                                             | Key themes<br>1) altruism - wanting to help future AYACs<br>2) trust in the clinicians<br>3) individuals perceptions of cure contra toxicity<br>4) adolescents as active participants in the decision making process<br>5) parental responsibility and authority<br>6) the difficulty of uncertainty                                                                                                                                                                                                                                                                    |

|    |                 |                                                                                                                                                                                                           |                      |                                                                 |                                                                                                                                  |                                                                                                                                                                                     |                                                                                                                                                                                                                                                                                                                                                                                                                                                                                                                                                                                                                                                                                                                                      |
|----|-----------------|-----------------------------------------------------------------------------------------------------------------------------------------------------------------------------------------------------------|----------------------|-----------------------------------------------------------------|----------------------------------------------------------------------------------------------------------------------------------|-------------------------------------------------------------------------------------------------------------------------------------------------------------------------------------|--------------------------------------------------------------------------------------------------------------------------------------------------------------------------------------------------------------------------------------------------------------------------------------------------------------------------------------------------------------------------------------------------------------------------------------------------------------------------------------------------------------------------------------------------------------------------------------------------------------------------------------------------------------------------------------------------------------------------------------|
| 1  | Jacobs          | Adolescent end of life preferences and congruence with their parents' preferences: results of a survey of adolescents with cancer                                                                         | Norway               | Qualitative<br>three sessions of dyadic interviews              | To explore AYACs' end of life preferences and to assess the congruence of these preferences with the parents' beliefs            | <u>17 adolescent/ family dyads</u><br><b>17 AYACs (age range 14-21, 71% under 18)</b>                                                                                               | Adolescents with cancer were comfortable discussing EOL, and the majority preferred to talk about EOL issues before they are facing EOL. There were substantive areas of agreement between adolescents and their surrogates, but important facets of adolescents' EOL wishes were not known by their families, reinforcing the importance of eliciting individual preferences and engaging dyads so parents can understand their children's wishes. 53% of AYACs had never spoken about their end of life preferences but 82% considered it important to let their loved ones know their wishes.                                                                                                                                     |
| 14 | Korsvold (2017) | A content analysis of emotional concerns expressed at the time of receiving a cancer diagnosis: An observational study of consultations with adolescent and young adult patients and their family members | Norway               | exploratory mixed methods study<br>audio recorded consultations | To investigate the emotional concerns of AYACs at the time of diagnosis and how to quantify how healthcare professionals respond | <u>18 participants</u><br><b>9 AYACs (age range 13-23)</b><br>Present with mother (n=9), father (n=1), sister (n=1) or mother and father (n=2)                                      | Four major themes of emotional concerns expressed by AYA patients and their family members during consultations for a cancer diagnosis:<br>1) side effects/late effects or infertility,<br>2) "what happens in the near future/practical aspects",<br>3) fear<br>4) sadness<br>AYA patients and family members expressed emotional concerns. HCPs typically responded by providing information, rather than affective aspects of the concerns In the sadness theme however, an explicit provide space affective response was the most common response (n=8) followed by an explicit provide space content response (n=7)<br>To make patients 'feel known' HCP should pay attention to the affective aspect of the expressed concern. |
| 34 | Lyon (2013)     | Family-Centered Advance Care Planning for Teens With Cancer                                                                                                                                               | USA<br>single centre | Qualitative<br>a randomised control pilot study                 | To examine the efficacy of family-centres ACP                                                                                    | <u>30 dyads</u><br><b>mean age of AYACs 16</b><br>17 were randomised to intervention and 13 were randomised to control<br>87% of surrogates were biological parents and were female | The model (ACP) increased congruence in the triad compared to the control standard of care group—so it is key. The family centres ACP AYACs reported feeling more informed than the control group                                                                                                                                                                                                                                                                                                                                                                                                                                                                                                                                    |

|                                                                                                                                                          |                    |                                                                                                                     |                      |                                                                                                                                          |                                                                                                                                                        |                                                                                                                               |                                                                                                                                                                                                                                                                                                                                                                                                                                                                                                                                                                                                                                                                                                                                                                                                                                                                                                                                                                                    |
|----------------------------------------------------------------------------------------------------------------------------------------------------------|--------------------|---------------------------------------------------------------------------------------------------------------------|----------------------|------------------------------------------------------------------------------------------------------------------------------------------|--------------------------------------------------------------------------------------------------------------------------------------------------------|-------------------------------------------------------------------------------------------------------------------------------|------------------------------------------------------------------------------------------------------------------------------------------------------------------------------------------------------------------------------------------------------------------------------------------------------------------------------------------------------------------------------------------------------------------------------------------------------------------------------------------------------------------------------------------------------------------------------------------------------------------------------------------------------------------------------------------------------------------------------------------------------------------------------------------------------------------------------------------------------------------------------------------------------------------------------------------------------------------------------------|
| 1<br>2<br>3<br>4<br>5<br>6<br>7<br>8<br>9<br>10<br>11<br>12<br>13<br>14<br>15<br>16<br>17<br>18<br>19<br>20<br>21                                        | Mack<br>(2019)     | Adolescent and<br>Young Adult<br>Cancer Patients'<br>Experiences with<br>Treatment<br>Decision-Making               | USA<br>Single Centre | Quantitative –<br><u>multivariate<br/>analysis, logistic<br/>regression</u><br><br><i>Surveys at<br/>diagnosis, 4 and<br/>12 months.</i> | Treatment<br>decision-making                                                                                                                           | <u>203 participants:</u><br><b>203 AYACs (age range: 15-<br/>29 years)</b>                                                    | A majority of AYACs (58%) want to share<br>decision-making with oncologists. The<br>remainder were split between the AYAC<br>wanting primary responsibility in decision-<br>making (20%) or wanting their oncologist to<br>have primary responsibility (22%).<br>A lower proportion of younger AYACs wanted<br>sole responsibility but this did not achieve<br>statistical significance (P = 0.07).<br>The majority (90%) of AYACs who lived with a<br>parent/guardian wanted some form of input from<br>their parents (either collaborative or considering<br>their opinion).<br>Younger AYACs (15-17 years) were more likely<br>to want greater involvement by their parents but<br>were also more likely to be less involved than<br>they wanted to be relative to their parents.<br>Decisional regret was less likely among AYACs<br>who trusted oncologists completely, and who<br>reported that oncologists understood what was<br>important to them when treatment started. |
| 22<br>23<br>24<br>25<br>26<br>27<br>28<br>29<br>30<br>31<br>32<br>33<br>34<br>35<br>36<br>37<br>38<br>39<br>40<br>41<br>42<br>43<br>44<br>45<br>46<br>47 | Olsavsky<br>(2021) | Family<br>communication<br>about fertility<br>preservation in<br>adolescent males<br>newly diagnosed<br>with cancer | USA                  | Qualitative                                                                                                                              | To explore<br>fertility<br>preservation<br>communication<br>among mothers,<br>fathers and their<br>male adolescents<br>newly diagnosed<br>with cancer. | <u>87 participants:</u><br><b>33 AYAC aged 12-25</b><br>32 mothers<br>22 fathers<br><br>Representing 37 families in<br>total. | Five process themes:<br>(1) Reliance on health care team and social<br>support networks to facilitate FP decisions<br>(noted just by parents),<br>(2) withholding parental opinion and deferring<br>the decision to the adolescent,<br>(3) ease of communication,<br>(4) communication barriers and facilitators,<br>(5) not being present or not remembering details<br>of FP conversations.<br>Four content themes:<br>(1) preference for biological parenthood (or<br>grandparenthood),<br>(2) consideration of future partner of AYAC's<br>desire for biological parenthood,<br>(3) sperm banking whilst it is a viable option,<br>(4) openness to alternative parenthood options                                                                                                                                                                                                                                                                                              |



1  
2  
3  
4  
5  
6  
7  
8  
9  
10  
11  
12  
13  
14  
15  
16  
17  
18  
19  
20  
21  
22  
23  
24  
25  
26  
27  
28  
29  
30  
31  
32  
33  
34  
35  
36  
37  
38  
39  
40  
41  
42  
43  
44  
45  
46  
47

Patterson  
(2012)

The Unmet Needs  
of Emerging Adults  
With a Cancer  
Diagnosis

Australia

Qualitative

Aim to contribute  
to the limited  
research base and  
inform our  
understanding of  
the needs of  
emerging adults  
with a diagnosis  
of cancer from a  
developmental  
perspective that  
appreciates the  
key transitional  
tasks of emerging  
adulthood  
identified by  
Arnett

14 Participants:  
14 AYAC aged 20-25,  
average age of 22

A cancer experience poses the potential for  
significant impact on the four requirements for  
achievement of adulthood.

The needs of these emerging adults were grouped  
into six themes; information, healthcare provision,  
daily living, interpersonal support, identity  
renegotiation and emotional distress.

These themes relate directly to the four  
requirements of adulthood.

1. The task of accepting responsibility for oneself emphasises the importance of empowering AYAC in their communication with HCP.
2. The task of deciding on personal beliefs and values highlights the importance of keeping the AYAC informed and encouraging them in decisions giving maximum opportunity to explore beliefs.
3. Establishing a relationship with parents as equals highlights the importance of maximising AYAC autonomy in relation to supporters.
4. The task of becoming financially independent highlights the importance of minimising disruption to daily life.

For peer review only

|                                                                                                                                              |                      |                                                                                        |                    |                                                                                          |                                                                                                     |                                                                                  |                                                                                                                                                                                                                                                                                                                                                                                                                                                                                                                                                                                                                                                                                                                                                                                                                                                                                                                                      |
|----------------------------------------------------------------------------------------------------------------------------------------------|----------------------|----------------------------------------------------------------------------------------|--------------------|------------------------------------------------------------------------------------------|-----------------------------------------------------------------------------------------------------|----------------------------------------------------------------------------------|--------------------------------------------------------------------------------------------------------------------------------------------------------------------------------------------------------------------------------------------------------------------------------------------------------------------------------------------------------------------------------------------------------------------------------------------------------------------------------------------------------------------------------------------------------------------------------------------------------------------------------------------------------------------------------------------------------------------------------------------------------------------------------------------------------------------------------------------------------------------------------------------------------------------------------------|
| 1<br>2<br>3<br>4<br>5<br>6<br>7<br>8<br>9<br>10<br>11<br>12<br>13<br>14<br>15<br>16<br>17<br>18<br>19<br>20<br>21<br>22<br>23                | Pennant<br>(2020)    | The Role of Social Support in Adolescent/Young Adults Coping with Cancer Treatment     | USA                | Qualitative                                                                              | To explore specific actions that help AYAC and what behaviours they want from their social supports | <u>20 Participants:</u><br>10 AYAC ages 15-26, mean age 18.9 years<br>10 parents | Themes of support included; presence, distraction, positive attitude, maintaining AYAC autonomy, communication and advocacy.<br>Mothers were the most noted family support. AYAC patients can differ in their preferences throughout treatment and this can, at times, appear contradictory.<br>AYACs appear to want autonomy and independence, but appreciate help with daily tasks from their parents.<br>They express the desire for privacy, but also value physical presence and communication<br>Parents must oscillate between being involved in and catering to their AYAC child's needs during treatment while allowing space for independence and autonomy.<br>The findings underscore the importance of maintaining open communication with AYAC patients about their preferences and needs throughout the course of treatment and asking them about both individual and social preferences, which may change frequently. |
| 24<br>25<br>26<br>27<br>28<br>29<br>30<br>31<br>32<br>33<br>34<br>35<br>36<br>37<br>38<br>39<br>40<br>41<br>42<br>43<br>44<br>45<br>46<br>47 | Pyke-Grimm<br>(2020) | 3 Dimensions of Treatment Decision Making in Adolescents and Young Adults with Cancer. | USA<br>Multicentre | Qualitative – <u>ethnographic</u><br><br><i>Semi-structured interviews, field notes.</i> | Explore the preferences of AYACs for involvement in healthcare decisions                            | <u>16 participants:</u><br><b>16 AYACs (age range: 14.7-20 years)</b>            | Emotions around diagnosis inhibit information receptiveness and ability to engage in treatment decisions (especially important decisions).<br>Initially AYACs struggle with the jargon and plethora of medical terms which are being used. They have limited knowledge which limits their questions, this increases over time.<br>The importance of decisions differs from one AYACs to the next. Also, some decisions are seen as having only one 'real' option.<br>AYACs engaged in minor decisions much earlier in their treatment, and some began engaging in more important decisions later in treatment.<br>AYACs could adopt an active (sole decision maker), collaborative (with healthcare professionals/supporters) or passive (healthcare professionals/supporters as decision makers) role.                                                                                                                              |

1  
2  
3  
4  
5  
6  
7  
8  
9  
10  
11  
12  
13  
14  
15  
16  
17  
18  
19  
20  
21  
22  
23  
24  
25  
26  
27  
28  
29  
30  
31  
32  
33  
34  
35  
36  
37  
38  
39  
40  
41  
42  
43  
44  
45  
46  
47

|                   |                                                                                                             |                         |                                                                                                                    |                                                                                                            |                                                                                                                   |                                                                                                                                                                                                                                                                                                                                                                                                                                                                                                                                                                                                                                                                                                                               |
|-------------------|-------------------------------------------------------------------------------------------------------------|-------------------------|--------------------------------------------------------------------------------------------------------------------|------------------------------------------------------------------------------------------------------------|-------------------------------------------------------------------------------------------------------------------|-------------------------------------------------------------------------------------------------------------------------------------------------------------------------------------------------------------------------------------------------------------------------------------------------------------------------------------------------------------------------------------------------------------------------------------------------------------------------------------------------------------------------------------------------------------------------------------------------------------------------------------------------------------------------------------------------------------------------------|
| Pyke-Grimm (2022) | Day-to-Day Decision Making by Adolescents and Young Adults with Cancer                                      | USA                     | Qualitative Interpretive focused ethnography within the socio-logic tradition, informed by symbolic interactionism | To explore involvement of AYAs with cancer in day-to-day decisions affected by their cancer and treatment. | <u>16 Participants:</u><br>16 AYAC aged 15-20 (at time of interview - with an average of one year from diagnosis) | Factors influence the involvement of AYAC in decision making such as the type of decision, the point in the cancer journey. They want to be involved.<br>Four day to day decision making categories were identified: mental mindset, self care practices, self-advocacy and negotiating relationships.<br>Parents were often present and staying strong was a recurring theme across mental mindset and negotiating relationships.<br>HCP are critical to facilitate AYAC participation in day to day decision making by encouraging autonomy and with effective communication.                                                                                                                                               |
| Sawyer (2019)     | Developmentally Appropriate Care for Adolescents and Young Adults with Cancer: How Well is Australia Doing? | Australasia Multicentre | <u>Quantitative – Chi-squared and Fisher’s exact test</u><br><br><i>Single time point survey.</i>                  | Explore quality of AYAC care in Australia.                                                                 | <u>196 participants:</u><br><b>196 AYACs (age range: 15-25 years)</b>                                             | >90% of AYACs reported positive responses for 11 of the 14 experience of care items which related to the quality of communication and general interactions with the cancer care team.<br>The most highly endorsed of these experiences of care items related to staff being friendly and respectful, communicating in ways that the AYAC understood, being supportive of AYACs asking questions and engaging families in discussion and decisions as the AYAC wished.<br>Older AYAC (20-25 years) report more empowerment to make decisions than younger AYACs and were more likely to report that healthcare professionals included their family in discussions and decision-making the way they wanted them to be included. |

For peer review only

|    |             |                  |             |                         |                |                                  |                                                     |
|----|-------------|------------------|-------------|-------------------------|----------------|----------------------------------|-----------------------------------------------------|
| 1  | Sisk (2022) | Interdependent   | USA         | Qualitative –           | Define         | 37 participants:                 | Building relationships: demonstrating clinical      |
| 2  |             | Functions of     | Multicentre | <u>content analysis</u> | communication  | <b>37 AYACs (age range: 12-</b>  |                                                     |
| 3  |             | Communication    |             | <i>Semi-structured</i>  | functions from | <b>20 years; mean: 16 years)</b> | competence, reliability, empathy, and showing       |
| 4  |             | with Adolescents |             | <i>interviews.</i>      | perspective of |                                  | care and concern. When clinicians demonstrated      |
| 5  |             | and Young Adults |             |                         | AYACs.         |                                  | these attributes, AYACs described feelings of       |
| 6  |             | in Oncology      |             |                         |                |                                  | trust in the clinicians' ability and intent to care |
| 7  |             |                  |             |                         |                |                                  | for them.                                           |
| 8  |             |                  |             |                         |                |                                  | Exchanging information: providing accurate and      |
| 9  |             |                  |             |                         |                |                                  | transparent information that was adapted to         |
| 10 |             |                  |             |                         |                |                                  | AYACs' needs. These needs related to the            |
| 11 |             |                  |             |                         |                |                                  | amount, complexity, timing, and pacing of           |
| 12 |             |                  |             |                         |                |                                  | information, and balancing communication            |
| 13 |             |                  |             |                         |                |                                  | between parents and AYACs.                          |
| 14 |             |                  |             |                         |                |                                  | AYACs think honesty and transparency is             |
| 15 |             |                  |             |                         |                |                                  | important. However, transparency could be           |
| 16 |             |                  |             |                         |                |                                  | burdensome.                                         |
| 17 |             |                  |             |                         |                |                                  | Exploring uncertainties and fears of the future mad |
| 18 |             |                  |             |                         |                |                                  | AYACs feel better prepared and decreasing           |
| 19 |             |                  |             |                         |                |                                  | anxiety. There was variation between AYACs          |
| 20 |             |                  |             |                         |                |                                  | for exploring these unknowns.                       |
| 21 |             |                  |             |                         |                |                                  | AYACs varied in their preferences in sharing        |
| 22 |             |                  |             |                         |                |                                  | distressing information and whether healthcare      |
| 23 |             |                  |             |                         |                |                                  | professionals should remain present and or give     |
| 24 |             |                  |             |                         |                |                                  | AYACs their privacy.                                |
| 25 |             |                  |             |                         |                |                                  | AYACs often feel that treatment related decisions   |
| 26 |             |                  |             |                         |                |                                  | realistically only have one choice giving a sense   |
| 27 |             |                  |             |                         |                |                                  | of powerlessness. They played a greater role in     |
| 28 |             |                  |             |                         |                |                                  | decisions outside of treatment related areas.       |
| 29 |             |                  |             |                         |                |                                  | While some AYACs preferred very passive or          |
| 30 |             |                  |             |                         |                |                                  | active roles most described an interdependent       |
| 31 |             |                  |             |                         |                |                                  | process of communication involving them, their      |
| 32 |             |                  |             |                         |                |                                  | parents, and their clinicians.                      |
| 33 |             |                  |             |                         |                |                                  | Parents often served as a conduit and buffer of     |
| 34 |             |                  |             |                         |                |                                  | communication between the AYAC and                  |
| 35 |             |                  |             |                         |                |                                  | healthcare professional. Many described the         |
| 36 |             |                  |             |                         |                |                                  | integral role of parents in communication           |
| 37 |             |                  |             |                         |                |                                  | regardless of their age.                            |

1  
2  
3  
4  
5  
6  
7  
8  
9  
10  
11  
12  
13  
14  
15  
16  
17  
18  
19  
20  
21  
22  
23  
24  
25  
26  
27  
28  
29  
30  
31  
32  
33  
34  
35  
36  
37  
38  
39  
40  
41  
42  
43  
44  
45  
46  
47

|               |                                                                                                                         |     |                                                                                  |                                                                                                                                                                                                                                                                                    |                                                                                                                   |                                                                                                                                                                                                                                                                                                                                                                                                                                                                                     |
|---------------|-------------------------------------------------------------------------------------------------------------------------|-----|----------------------------------------------------------------------------------|------------------------------------------------------------------------------------------------------------------------------------------------------------------------------------------------------------------------------------------------------------------------------------|-------------------------------------------------------------------------------------------------------------------|-------------------------------------------------------------------------------------------------------------------------------------------------------------------------------------------------------------------------------------------------------------------------------------------------------------------------------------------------------------------------------------------------------------------------------------------------------------------------------------|
| Sisk (2022)   | Co-management of communication and care in adolescent and young adult oncology                                          | USA | Qualitative<br>Semi-structured interviews                                        | Study aimed to learn how AYAs and parents shared and delegated roles in communication and care during and after treatment for cancer                                                                                                                                               | <u>37 Participants:</u><br>37 AYAC aged 12-24<br>Mean age 16 years                                                | There are 6 roles that AYAC co-manage with parents; managing information, managing social and emotional needs, managing health, advocacy and empowerment, making decisions and managing logistics.<br>Five factors that influence AYAC roles in communication were:<br>AYAC agency<br>Clinical encouragement<br>Emotional and physical well-being<br>Personality, preferences and values<br>Insights and skills<br><br>There are multiple benefits of engagement of the adolescent. |
| Viola (2018)  | Problem-solving skills, parent-adolescent communication, dyadic functioning, and distress among adolescents with cancer | USA | Mixed methods study                                                              | The aim was to describe and assess how intrapersonal (i.e., problem-solving ability) and social-ecological factors (i.e., cancer-related communication with parents and parent-adolescent dyadic relationship quality) are associated with adolescent adjustment (i.e., distress). | <u>78 participants:</u><br>39 AYAC and 39 parent pairs<br>AYAC 14-20 mean age 16.1<br>39 Parents - 79.5 % mothers | Better adolescent problem solving skills and better parent problem solving skills were associated with lower adolescent distress.<br>Parents and adolescents reported similar moderate levels of cancer related communication problems.<br>The most commonly endorsed cancer-related problem was “not talking about what to do if the AYAC got significantly worse”.<br>Parents reported better problem solving ability and better dyadic functioning than their adolescent.        |
| Weaver (2016) | “Being a Good Patient” During Times of Illness as Defined by Adolescent Patients With Cancer                            | USA | Qualitative - <u>semantic content analysis</u><br><br>Semi-structured interviews |                                                                                                                                                                                                                                                                                    | <u>40 participants</u><br>AYAC ages 12-19<br>Mean age of 15.5 years                                               | The concepts of adherence and compliance were the primary phrases used to describe the good patient role, but always within the context of a relationship. Of note: A total of 23 adolescents requested to be interviewed alone with the interviewer (57.5%)                                                                                                                                                                                                                        |

|                                                                               |                       |                                                                                                                                                             |                 |                                                                                                            |                                                                                                                                                                     |                                                                                                                                                                                        |                                                                                                                                                                                                                                                                                                                                                                                                                                                                                                                                                                                                                                                         |
|-------------------------------------------------------------------------------|-----------------------|-------------------------------------------------------------------------------------------------------------------------------------------------------------|-----------------|------------------------------------------------------------------------------------------------------------|---------------------------------------------------------------------------------------------------------------------------------------------------------------------|----------------------------------------------------------------------------------------------------------------------------------------------------------------------------------------|---------------------------------------------------------------------------------------------------------------------------------------------------------------------------------------------------------------------------------------------------------------------------------------------------------------------------------------------------------------------------------------------------------------------------------------------------------------------------------------------------------------------------------------------------------------------------------------------------------------------------------------------------------|
| 1<br>2<br>3<br>4<br>5<br>6<br>7<br>8<br>9<br>10<br>11<br>12<br>13<br>14<br>15 | Weaver (2015)         | Adolescents' Preferences for Treatment Decisional Involvement During Their Cancer                                                                           | USA Multicentre | Qualitative – <u>semantic content analysis</u><br><br><i>Semi-structured interviews.</i>                   | Investigate AYACs' decision-making preferences and how supports and healthcare professionals can support involvement.                                               | <u>40 participants:</u><br><b>40 AYACs (age range at interview: 12-18.9 years; 0.5-6 months from diagnosis/relapse)</b><br><br><i>NB: 34 AYACs primary diagnosis, 6 AYACs relapse.</i> | AYACs indicated a spectrum of preferred decisional roles, with the most common being an actively involved role (65%), although a shared decision-making approach was still valued. AYACs recognized that situational and social contexts might shift their preferred level of involvement in medical decisions. Although adolescents wanted to be involved in decisions, they also expressed an appreciation of family insight, parental presence, and clinician guidance. AYACs can retrospectively identify their preferences for inclusion in medical decision-making, and even when preferring involvement, they value the input of trusted others. |
| 16<br>17<br>18<br>19<br>20<br>21<br>22<br>23<br>24<br>25<br>26<br>27          | Wu (2021)             | Decisional conflicts, anxiety, and perceptions of shared decision-making in cancer treatment trajectory among adolescents with cancer: A longitudinal study | Taiwan          | Qualitative. An explanatory mixed method was used, incorporating questionnaires and individual interviews. | To describe the perception on levels of decision-making during cancer treatment for adolescents with cancer and examine the trajectory of their decisional conflict | <u>44 participants:</u><br><b>22 AYAC</b> 11 male and 11 female<br>mean age 15.39<br><b>22 Supporters:</b><br>father n=1<br>mothers n=12<br>both n=6<br>other n=3                      | Different levels of participation in shared decision making (SDM) during the treatment trajectory were found. Participants experienced the highest decisional conflict during diagnosis. Roles in healthcare communication varied from direct participation to indirect involvement. Overall, participants reported that doctors and parents decided their level of involvement, communication and or decision making.                                                                                                                                                                                                                                  |
| 28<br>29<br>30<br>31<br>32<br>33<br>34<br>35<br>36<br>37<br>38                | Zarnegar et al (2018) | Recall of Fertility Discussion by Adolescent Female Cancer Patients: A Survey-Based Pilot Study                                                             | USA             | Qualitative                                                                                                | To assess: recall of a fertility discussion, satisfaction with fertility knowledge, and identify factors that may influence recall.                                 | <u>19 participants:</u><br><b>19 AYAC aged</b> 13-18 years and a mean age of 15.6                                                                                                      | 42% and 52% of AYAC did not recall discussion regarding treatment related infertility or fertility preservation during initial treatment planning. 63% of AYAC reported that parents made all or most of the decisions whereas 30.8% reported making decisions with parents. Key Finding - A greater percentage of AYAC who reported making a joint decision with parents recalled 71% of fertility discussions than those who reported parents made most or all of medical decisions.                                                                                                                                                                  |

‡Age range at diagnosis is given except where this was not provided in the article in which alternative metrics are presented and this is highlighted.

AYA(C) = adolescent and young adult (with cancer); NOS = not otherwise specified; RM-ANOVA = repeated measures analysis of variance.

## Supplementary File – Search strategy and history

### Searches run November 2022

Limited to 2005 onwards, and to English language only.

For peer review only

## Medline (via Ovid)

Ovid MEDLINE(R) and Epub Ahead of Print, In-Process, In-Data-Review & Other Non-Indexed Citations, Daily and Versions <1946 to November 23, 2022>

1 (Parent\* or guardian\* or mother\* or father\* or partner or wife or wives or husband\* or boyfriend\* or girlfriend\* or sibling\* or friend\* or carer\* or "third person" or caregiver\* or "care-giver\*" or spouse\* or supporter\* or support network\*).ti,ab. or parents/ or fathers/ or mothers/ or spouses/ or caregivers/ or siblings/ or friends/ or legal guardians/ 1074121

2 (TYA cancer or TYA oncology or AYA cancer or AYA oncology or (young adult adj3 (cancer or oncology or leuk?em\* or lymphom\* or h?ematol\*)) or ("teenage and young adult" adj3 cancer) or ("teenage and young adult" adj3 oncology) or (teenage\* adj3 cancer) or (teenage\* adj3 oncology) or (adolescen\* adj3 cancer) or (adolescen\* adj3 oncology) or (young people adj3 cancer) or (young people adj3 oncology) or ("teenage and young adult" adj3 leuk?emia\*) or (teenage\* adj3 leuk?emia\*) or (adolescen\* adj3 leuk?emia\*) or (young people adj3 leuk?emia\*) or (young adult adj3 leuk?emia\*) or ("teenage and young adult" adj3 h?ematol\*) or (teenage\* adj3 h?ematol\*) or (adolescen\* adj3 h?ematol\*) or (young people adj3 h?ematol\*) or (young adult adj3 h?ematol\*) or ("teenage and young adult" adj3 lymphom\*) or (teenage\* adj3 lymphom\*) or (adolescen\* adj3 lymphom\*) or (young people adj3 lymphom\*) or (young adult adj3 lymphom\*).ti,ab. or ((exp adolescent/ or exp young adult/) and exp neoplasms/) 333070

3 (Communicat\* or Disclos\* or inform\* or Interact\* or relationship\* or Conversation\* or Dialogue\* or triad\* or Interview\* or consult\* or decision making).ti,ab. or exp communication/ or exp disclosure/ or exp information dissemination/ or exp physician-patient relations/ 5715959

4 (affect\* or effect\* or influenc\* or resultant or impact\* or perception\* or perspective\* or encounter\* or preference or opinion or involvement or occurrence\* or feel or "go through" or experienc\*).ti,ab. 12406352

5 1 and 2 and 3 and 4 3380

6 limit 5 to (english language and yr="2005 -Current") 2715



## Embase (via Ovid)

Embase <1974 to 2022 November 23>

1 (TYA cancer or TYA oncology or AYA cancer or AYA oncology or (young adult adj3  
 2 (cancer or oncology or leuk?em\* or lymphom\* or h?ematol\*)) or ("teenage and young  
 3 adult" adj3 cancer) or ("teenage and young adult" adj3 oncology) or (teenage\* adj3 cancer)  
 4 or (teenage\* adj3 oncology) or (adolescen\* adj3 cancer) or (adolescen\* adj3 oncology) or  
 5 (young people adj3 cancer) or (young people adj3 oncology) or ("teenage and young adult"  
 6 adj3 leuk?emia\*) or (teenage\* adj3 leuk?emia\*) or (adolescen\* adj3 leuk?emia\*) or (young  
 7 people adj3 leuk?emia\*) or (young adult adj3 leuk?emia\*) or ("teenage and young adult"  
 8 adj3 h?ematol\*) or (teenage\* adj3 h?ematol\*) or (adolescen\* adj3 h?ematol\*) or (young  
 9 people adj3 h?ematol\*) or (young adult adj3 h?ematol\*) or ("teenage and young adult" adj3  
 10 lymphom\*) or (teenage\* adj3 lymphom\*) or (adolescen\* adj3 lymphom\*) or (young people  
 11 adj3 lymphom\*) or (young adult adj3 lymphom\*)).ti,ab. or ((exp \*adolescent/ or exp \*young  
 12 adult/) and exp \*neoplasm/) 9638

2 (Communicat\* or Disclos\* or inform\* or Interact\* or relationship\* or Conversation\*  
 3 or Dialogue\* or triad\* or Interview\* or consult\* or decision making).ti,ab. or exp  
 4 \*interpersonal communication/ or exp \*professional-patient relationship/ or exp  
 5 \*information dissemination/ or exp \*conversation/ 6997005

3 (Parent\* or guardian\* or mother\* or father\* or partner or wife or wives or husband\*  
 4 or boyfriend\* or girlfriend\* or sibling\* or friend\* or carer\* or "third person" or caregiver\* or  
 5 "care-giver\*" or spouse\* or supporter\* or support network\*).ti,ab. or \*parent/ or \*father/  
 6 or \*mother/ or \*spouse/ or \*caregiver/ or \*social worker/ or \*sibling/ or \*friend/ or \*legal  
 7 guardian/ 1339977

4 (affect\* or effect\* or influenc\* or resultant or impact\* or perception\* or  
 5 perspective\* or encounter\* or preference or opinion or involvement or occurrence\* or feel  
 6 or "go through" or experienc\*).ti,ab. 15453173

5 1 and 2 and 3 and 4 939

6 limit 5 to (english language and yr="2005 -Current") 873

## PsycInfo (via Ebscohost)

| #   | Query                                                                                                                                                                                                           | Limiters/Expanders                                                                                                                                               | Last Run Via                                                                                                 | Results   |
|-----|-----------------------------------------------------------------------------------------------------------------------------------------------------------------------------------------------------------------|------------------------------------------------------------------------------------------------------------------------------------------------------------------|--------------------------------------------------------------------------------------------------------------|-----------|
| S11 | S1 AND S2 AND S7 AND S8                                                                                                                                                                                         | Limiters -<br>Publication Year:<br>2005-2022<br>Expanders - Apply<br>equivalent subjects<br>Narrow by<br>Language: - english<br>Search modes -<br>Boolean/Phrase | Interface - EBSCOhost<br>Research Databases<br>Search Screen - Basic<br>Search<br>Database - APA<br>PsycInfo | 1,683     |
| S10 | S1 AND S2 AND S7 AND S8                                                                                                                                                                                         | Expanders - Apply<br>equivalent subjects<br>Narrow by<br>Language: - english<br>Search modes -<br>Boolean/Phrase                                                 | Interface - EBSCOhost<br>Research Databases<br>Search Screen - Basic<br>Search<br>Database - APA<br>PsycInfo | 1,981     |
| S9  | S1 AND S2 AND S7 AND S8                                                                                                                                                                                         | Expanders - Apply<br>equivalent subjects<br>Search modes -<br>Boolean/Phrase                                                                                     | Interface - EBSCOhost<br>Research Databases<br>Search Screen - Basic<br>Search<br>Database - APA<br>PsycInfo | 2,017     |
| S8  | (affect* or effect* or influenc* or resultant or<br>impact* or perception* or perspective* or<br>encounter* or preference or opinion or<br>involvement or occurrence* or feel or "go through"<br>or experienc*) | Expanders - Apply<br>equivalent subjects<br>Search modes -<br>Boolean/Phrase                                                                                     | Interface - EBSCOhost<br>Research Databases<br>Search Screen - Basic<br>Search<br>Database - APA<br>PsycInfo | 3,366,619 |
| S7  | (S5) or (S3 )                                                                                                                                                                                                   | Expanders - Apply<br>equivalent subjects<br>Search modes -<br>Boolean/Phrase                                                                                     | Interface - EBSCOhost<br>Research Databases<br>Search Screen - Basic<br>Search<br>Database - APA<br>PsycInfo | 13,719    |
| S6  | S4 AND S5                                                                                                                                                                                                       | Expanders - Apply<br>equivalent subjects                                                                                                                         | Interface - EBSCOhost<br>Research Databases                                                                  | 13,275    |

1  
2  
3  
4  
5  
6  
7  
8  
9  
10  
11  
12  
13  
14  
15  
16  
17  
18  
19  
20  
21  
22  
23  
24  
25  
26  
27  
28  
29  
30  
31  
32  
33  
34  
35  
36  
37  
38  
39  
40  
41  
42  
43  
44  
45  
46  
47  
48  
49  
50  
51  
52  
53  
54  
55  
56  
57  
58  
59  
60

|    |                                                                                                                                                                                                                                                                                                                                                                                                                                                                                                                                                                                                                                                                                                                                                                                                                                                                                                                             |                                                                                                                                                                      |                                                                                                              |           |
|----|-----------------------------------------------------------------------------------------------------------------------------------------------------------------------------------------------------------------------------------------------------------------------------------------------------------------------------------------------------------------------------------------------------------------------------------------------------------------------------------------------------------------------------------------------------------------------------------------------------------------------------------------------------------------------------------------------------------------------------------------------------------------------------------------------------------------------------------------------------------------------------------------------------------------------------|----------------------------------------------------------------------------------------------------------------------------------------------------------------------|--------------------------------------------------------------------------------------------------------------|-----------|
|    |                                                                                                                                                                                                                                                                                                                                                                                                                                                                                                                                                                                                                                                                                                                                                                                                                                                                                                                             | Search modes -<br>Boolean/Phrase                                                                                                                                     | Search Screen - Basic<br>Search<br>Database - APA<br>PsycInfo                                                |           |
|    |                                                                                                                                                                                                                                                                                                                                                                                                                                                                                                                                                                                                                                                                                                                                                                                                                                                                                                                             | Expanders - Apply<br>equivalent subjects<br>Narrow by<br>SubjectAge: -<br>adolescence (13-17<br>yrs)<br>Narrow by<br>SubjectAge: - young<br>adulthood (18-29<br>yrs) | Interface - EBSCOhost<br>Research Databases<br>Search Screen - Basic<br>Search<br>Database - APA<br>PsycInfo |           |
| S5 | ((DE "neoplasms" OR DE "Benign Neoplasms" OR DE "Breast Neoplasms" OR DE "Endocrine Neoplasms" OR DE "Leukemias" OR DE "Melanoma" OR DE "Metastasis" OR DE "Nervous System Neoplasms" OR DE "Terminal Cancer"))                                                                                                                                                                                                                                                                                                                                                                                                                                                                                                                                                                                                                                                                                                             | Search modes -<br>Boolean/Phrase                                                                                                                                     | Interface - EBSCOhost<br>Research Databases<br>Search Screen - Basic<br>Search<br>Database - APA<br>PsycInfo | 13,275    |
| S4 | ((DE "neoplasms" OR DE "Benign Neoplasms" OR DE "Breast Neoplasms" OR DE "Endocrine Neoplasms" OR DE "Leukemias" OR DE "Melanoma" OR DE "Metastasis" OR DE "Nervous System Neoplasms" OR DE "Terminal Cancer"))                                                                                                                                                                                                                                                                                                                                                                                                                                                                                                                                                                                                                                                                                                             | Expanders - Apply<br>equivalent subjects<br>Search modes -<br>Boolean/Phrase                                                                                         | Interface - EBSCOhost<br>Research Databases<br>Search Screen - Basic<br>Search<br>Database - APA<br>PsycInfo | 58,767    |
| S3 | ("TYA cancer" or "TYA oncology" or "AYA cancer" or "AYA oncology" or ("young adult" n3 (cancer or oncology or leuk?em* or lymphom* or h?ematol*)) or ("teenage and young adult" n3 cancer) or ("teenage and young adult" n3 oncology) or (teenage* n3 cancer) or (teenage* n3 oncology) or (adolescen* n3 cancer) or (adolescen* n3 oncology) or ("young people" n3 cancer) or ("young people" n3 oncology) or ("teenage and young adult" n3 leuk?emia*) or (teenage* n3 leuk?emia*) or (adolescen* n3 leuk?emia*) or ("young people" n3 leuk?emia*) or ("young adult" n3 leuk?emia*) or ("teenage and young adult" n3 h?ematol*) or (teenage* n3 h?ematol*) or (adolescen* n3 h?ematol*) or ("young people" n3 h?ematol*) or ("young adult" n3 h?ematol*) or ("teenage and young adult" n3 lymphom*) or (teenage* n3 lymphom*) or (adolescen* n3 lymphom*) or ("young people" n3 lymphom*) or ("young adult" n3 lymphom*)) | Expanders - Apply<br>equivalent subjects<br>Search modes -<br>Boolean/Phrase                                                                                         | Interface - EBSCOhost<br>Research Databases<br>Search Screen - Basic<br>Search<br>Database - APA<br>PsycInfo | 1,864     |
| S2 | (Communicat* or Disclos* or inform* or Interact* or relationship* or Conversation* or Dialogue* or triad* or Interview* or consult* or "decision making") or DE "communication" OR DE "information dissemination" OR DE "conversation"                                                                                                                                                                                                                                                                                                                                                                                                                                                                                                                                                                                                                                                                                      | Expanders - Apply<br>equivalent subjects<br>Search modes -<br>Boolean/Phrase                                                                                         | Interface - EBSCOhost<br>Research Databases<br>Search Screen - Basic<br>Search<br>Database - APA<br>PsycInfo | 2,423,980 |
| S1 | (Parent* or guardian* or mother* or father* or partner or wife or wives or husband* or boyfriend* or girlfriend* or sibling* or friend* or teacher* or social worker* or carer* or "third                                                                                                                                                                                                                                                                                                                                                                                                                                                                                                                                                                                                                                                                                                                                   | Expanders - Apply<br>equivalent subjects<br>Search modes -<br>Boolean/Phrase                                                                                         | Interface - EBSCOhost<br>Research Databases<br>Search Screen - Basic<br>Search                               | 894,375   |

person" or caregiver\* or "care-giver\*" or spouse\*  
 or chaperone\*) OR DE "parents" OR DE "mothers"  
 OR DE "fathers" OR DE "spouses" OR DE "wives"  
 OR DE "husbands" OR DE "siblings" OR DE  
 "significant others" OR DE "social workers" OR DE  
 "guardianship" OR DE "caregivers"

Database - APA  
 PsycInfo

## CINAHL (via Ebscohost)

Thursday, November 24, 2022 6:21:27 PM

| #  | Query                   | Limiters/Expanders                                                                                                                                                      | Last Run Via                                                                                                          | Results |
|----|-------------------------|-------------------------------------------------------------------------------------------------------------------------------------------------------------------------|-----------------------------------------------------------------------------------------------------------------------|---------|
| S7 | S1 AND S2 AND S3 AND S4 | Limiters - Published<br>Date: 20050101-<br>20221231<br>Expanders - Apply<br>equivalent subjects<br>Narrow by Language:<br>- english<br>Search modes -<br>Boolean/Phrase | Interface -<br>EBSCOhost<br>Research<br>Databases<br>Search<br>Screen -<br>Advanced<br>Search<br>Database -<br>CINAHL | 1,837   |
| S6 | S1 AND S2 AND S3 AND S4 | Limiters - Published<br>Date: 20050101-<br>20221231<br>Expanders - Apply<br>equivalent subjects<br>Search modes -<br>Boolean/Phrase                                     | Interface -<br>EBSCOhost<br>Research<br>Databases<br>Search<br>Screen -<br>Advanced<br>Search<br>Database -<br>CINAHL | 1,866   |
| S5 | S1 AND S2 AND S3 AND S4 | Expanders - Apply<br>equivalent subjects<br>Search modes -<br>Boolean/Phrase                                                                                            | Interface -<br>EBSCOhost<br>Research<br>Databases<br>Search<br>Screen -<br>Advanced<br>Search<br>Database -<br>CINAHL | 2,106   |

|    |                                                                                                                                                                                                                                                                                                                                                                                                                                                                                                                                                                                                                                                                                                                                                                                                                                                                                                                                                                                                 |                                                                        |                                                                                                     |           |
|----|-------------------------------------------------------------------------------------------------------------------------------------------------------------------------------------------------------------------------------------------------------------------------------------------------------------------------------------------------------------------------------------------------------------------------------------------------------------------------------------------------------------------------------------------------------------------------------------------------------------------------------------------------------------------------------------------------------------------------------------------------------------------------------------------------------------------------------------------------------------------------------------------------------------------------------------------------------------------------------------------------|------------------------------------------------------------------------|-----------------------------------------------------------------------------------------------------|-----------|
| S4 | (affect* or effect* or influenc* or resultant or impact* or perception* or perspective* or encounter* or preference or opinion or involvement or occurance* or feel or "go through" or experienc*)                                                                                                                                                                                                                                                                                                                                                                                                                                                                                                                                                                                                                                                                                                                                                                                              | Expanders - Apply equivalent subjects<br>Search modes - Boolean/Phrase | Interface - EBSCOhost<br>Research Databases<br>Search Screen - Advanced Search<br>Database - CINAHL | 3,016,184 |
| S3 | ("TYA cancer" or "TYA oncology" or "AYA cancer" or "AYA oncology" or ("young adult" n3 (cancer or oncology or leuk?em* or lymphom* or h?ematol*)) or ("teenage and young adult" n3 cancer) or ("teenage and young adult" n3 oncology) or (teenage* n3 cancer) or (teenage* n3 oncology) or (adolescen* n3 cancer) or (adolescen* n3 oncology) or ("young people" n3 cancer) or ("young people" n3 oncology) or ("teenage and young adult" n3 leuk?emia*) or (teenage* n3 leuk?emia*) or (adolescen* n3 leuk?emia*) or ("young people" n3 leuk?emia*) or ("young adult" n3 leuk?emia*) or ("teenage and young adult" n3 h?ematol*) or (teenage* n3 h?ematol*) or (adolescen* n3 h?ematol*) or ("young people" n3 h?ematol*) or ("young adult" n3 h?ematol*) or ("teenage and young adult" n3 lymphom*) or (teenage* n3 lymphom*) or (adolescen* n3 lymphom*) or ("young people" n3 lymphom*) or ("young adult" n3 lymphom*)) OR ((MH "adolescence+" OR MH "young adult+") AND (MH "neoplasms+")) | Expanders - Apply equivalent subjects<br>Search modes - Boolean/Phrase | Interface - EBSCOhost<br>Research Databases<br>Search Screen - Advanced Search<br>Database - CINAHL | 59,927    |
| S2 | (Communicat* or Disclos* or inform* or Interact* or relationship* or Conversation* or Dialogue* or triad* or Interview* or consult* or "decision making") or MH "communication+" OR MH "discussion" OR MH                                                                                                                                                                                                                                                                                                                                                                                                                                                                                                                                                                                                                                                                                                                                                                                       | Expanders - Apply equivalent subjects<br>Search modes - Boolean/Phrase | Interface - EBSCOhost<br>Research Databases<br>Search Screen - Advanced                             | 2,016,086 |

|    |                                                                                                                                                                                                                                                                                                                                                                                                        |                                                                        |                                                                                               |         |
|----|--------------------------------------------------------------------------------------------------------------------------------------------------------------------------------------------------------------------------------------------------------------------------------------------------------------------------------------------------------------------------------------------------------|------------------------------------------------------------------------|-----------------------------------------------------------------------------------------------|---------|
|    | "conversation" OR (MH "Professional-Patient Relations+")                                                                                                                                                                                                                                                                                                                                               |                                                                        | Search Database - CINAHL                                                                      |         |
| S1 | (Parent* or guardian* or mother* or father* or partner or wife or wives or husband* or boyfriend* or girlfriend* or sibling* or friend* or teacher* or social worker* or carer* or "third person" or caregiver* or "care-giver*" or spouse* or chaperone*) OR MH "parents" OR MH "mothers" OR MH "fathers" OR MH "spouses" OR MH "siblings" OR MH "teachers" OR MH "social workers" OR MH "caregivers" | Expanders - Apply equivalent subjects<br>Search modes - Boolean/Phrase | Interface - EBSCOhost<br>Research Databases Search Screen - Advanced Search Database - CINAHL | 544,991 |

## Web of Science Core Collection

# Web of Science Search Strategy (v0.1)

# Database: Web of Science Core Collection

# Entitlements:

- WOS.IC: 1993 to 2022
- WOS.CCR: 1985 to 2022
- WOS.SCI: 1900 to 2022
- WOS.AHCI: 1975 to 2022
- WOS.BHCI: 2008 to 2022
- WOS.BSCI: 2008 to 2022
- WOS.ESCI: 2017 to 2022
- WOS.ISTP: 1990 to 2022
- WOS.SSCI: 1956 to 2022
- WOS.ISSHP: 1990 to 2022

# Searches:

1: TS=(Parent\* or guardian\* or mother\* or father\* or partner or wife or wives or husband\* or boyfriend\* or girlfriend\* or sibling\* or friend\* or teacher\* or social worker\* or carer\* or "third person" or caregiver\* or "care-giver\*" or spouse\* or chaperone\*)

Results: 2129759

2: TS=("TYA cancer" or "TYA oncology" or "AYA cancer" or "AYA oncology" or ("young adult" near/3 (cancer or oncology or leuk?em\* or lymphom\* or h?ematol\*)) or ("teenage and young adult" near/3 cancer) or ("teenage and young adult" near/3 oncology) or (teenage\* near/3 cancer) or (teenage\* near/3 oncology) or (adolescen\* near/3 cancer) or (adolescen\*

1  
2  
3 near/3 oncology) or ("young people" near/3 cancer) or ("young people" near/3 oncology) or  
4 ("teenage and young adult" near/3 leuk?emia\*) or (teenage\* near/3 leuk?emia\*) or  
5 (adolescen\* near/3 leuk?emia\*) or ("young people" near/3 leuk?emia\*) or ("young adult"  
6 near/3 leuk?emia\*) or ("teenage and young adult" near/3 h?ematol\*) or (teenage\* near/3  
7 h?ematol\*) or (adolescen\* near/3 h?ematol\*) or ("young people" near/3 h?ematol\*) or  
8 ("young adult" near/3 h?ematol\*) or ("teenage and young adult" near/3 lymphom\*) or  
9 (teenage\* near/3 lymphom\*) or (adolescen\* near/3 lymphom\*) or ("young people" near/3  
10 lymphom\*) or ("young adult" near/3 lymphom\*) Results: 7793  
11  
12  
13

14 3: TS=( Communicat\* or Disclos\* or inform\* or Interact\* or relationship\* or Conversation\*  
15 or Dialogue\* or triad\* or Interview\* or consult\* or "decision making")  
16 Results: 11889093  
17  
18

19 4: TS= (affect\* or effect\* or influenc\* or resultant or impact\* or perception\* or perspective\*  
20 or encounter\* or preference or opinion or involvement or occurrence\* or feel or "go  
21 through" or experienc\*) Results: 24306121  
22  
23

24 5: #4 AND #3 AND #2 AND #1 Results: 684  
25

26 6: #4 AND #3 AND #2 AND #1 Results: 684  
27  
28

29 7: #4 AND #3 AND #2 AND #1 and 2005 or 2006 or 2007 or 2008 or 2009 or 2010 or 2011 or  
30 2012 or 2013 or 2014 or 2015 or 2016 or 2017 or 2018 or 2019 or 2020 or 2021 or 2022  
31 (Publication Years) Results: 644  
32  
33

34 8: #4 AND #3 AND #2 AND #1 and 2005 or 2006 or 2007 or 2008 or 2009 or 2010 or 2011 or  
35 2012 or 2013 or 2014 or 2015 or 2016 or 2017 or 2018 or 2019 or 2020 or 2021 or 2022  
36 (Publication Years) and English (Languages) Results: 619  
37  
38  
39  
40  
41  
42  
43  
44  
45  
46  
47  
48  
49  
50  
51  
52  
53  
54  
55  
56  
57  
58  
59  
60

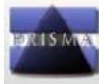

## PRISMA 2020 Checklist

| Section and Topic             | Item # | Checklist item                                                                                                                                                                                                                                                                                       | Location where item is reported         |
|-------------------------------|--------|------------------------------------------------------------------------------------------------------------------------------------------------------------------------------------------------------------------------------------------------------------------------------------------------------|-----------------------------------------|
| <b>TITLE</b>                  |        |                                                                                                                                                                                                                                                                                                      |                                         |
| Title                         | 1      | Identify the report as a systematic review.                                                                                                                                                                                                                                                          | Page 1                                  |
| <b>ABSTRACT</b>               |        |                                                                                                                                                                                                                                                                                                      |                                         |
| Abstract                      | 2      | See the PRISMA 2020 for Abstracts checklist.                                                                                                                                                                                                                                                         | Page 2                                  |
| <b>INTRODUCTION</b>           |        |                                                                                                                                                                                                                                                                                                      |                                         |
| Rationale                     | 3      | Describe the rationale for the review in the context of existing knowledge.                                                                                                                                                                                                                          | Pages 3 and 4                           |
| Objectives                    | 4      | Provide an explicit statement of the objective(s) or question(s) the review addresses.                                                                                                                                                                                                               | Page 4                                  |
| <b>METHODS</b>                |        |                                                                                                                                                                                                                                                                                                      |                                         |
| Eligibility criteria          | 5      | Specify the inclusion and exclusion criteria for the review and how studies were grouped for the syntheses.                                                                                                                                                                                          | Page 5                                  |
| Information sources           | 6      | Specify all databases, registers, websites, organisations, reference lists and other sources searched or consulted to identify studies. Specify the date when each source was last searched or consulted.                                                                                            | Page 4 and supplemental file            |
| Search strategy               | 7      | Present the full search strategies for all databases, registers and websites, including any filters and limits used.                                                                                                                                                                                 | Page 4, Table 1 and supplemental file 1 |
| Selection process             | 8      | Specify the methods used to decide whether a study met the inclusion criteria of the review, including how many reviewers screened each record and each report retrieved, whether they worked independently, and if applicable, details of automation tools used in the process.                     | Page 5                                  |
| Data collection process       | 9      | Specify the methods used to collect data from reports, including how many reviewers collected data from each report, whether they worked independently, any processes for obtaining or confirming data from study investigators, and if applicable, details of automation tools used in the process. | Pages 4 and 5                           |
| Data items                    | 10a    | List and define all outcomes for which data were sought. Specify whether all results that were compatible with each outcome domain in each study were sought (e.g. for all measures, time points, analyses), and if not, the methods used to decide which results to collect.                        | Page 5                                  |
|                               | 10b    | List and define all other variables for which data were sought (e.g. participant and intervention characteristics, funding sources). Describe any assumptions made about any missing or unclear information.                                                                                         | Page 5                                  |
| Study risk of bias assessment | 11     | Specify the methods used to assess risk of bias in the included studies, including details of the tool(s) used, how many reviewers assessed each study and whether they worked independently, and if applicable, details of automation tools used in the process.                                    | Page 5                                  |
| Effect measures               | 12     | Specify for each outcome the effect measure(s) (e.g. risk ratio, mean difference) used in the synthesis or presentation of results.                                                                                                                                                                  | Page 5                                  |
| Synthesis methods             | 13a    | Describe the processes used to decide which studies were eligible for each synthesis (e.g. tabulating the study intervention characteristics and comparing against the planned groups for each synthesis (item #5)).                                                                                 | Page 5                                  |
|                               | 13b    | Describe any methods required to prepare the data for presentation or synthesis, such as handling of missing summary statistics, or data conversions.                                                                                                                                                | Page 5                                  |
|                               | 13c    | Describe any methods used to tabulate or visually display results of individual studies and syntheses.                                                                                                                                                                                               | Page 5                                  |
|                               | 13d    | Describe any methods used to synthesize results and provide a rationale for the choice(s). If meta-analysis was performed, describe the model(s), method(s) to identify the presence and extent of statistical heterogeneity, and software package(s) used.                                          | Page 5                                  |



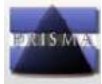

## PRISMA 2020 Checklist

| Section and Topic             | Item # | Checklist item                                                                                                                                                                                                                                                                       | Location where item is reported     |
|-------------------------------|--------|--------------------------------------------------------------------------------------------------------------------------------------------------------------------------------------------------------------------------------------------------------------------------------------|-------------------------------------|
|                               | 13e    | Describe any methods used to explore possible causes of heterogeneity among study results (e.g. subgroup analysis, meta-regression).                                                                                                                                                 | Pages 5 and 6                       |
|                               | 13f    | Describe any sensitivity analyses conducted to assess robustness of the synthesized results.                                                                                                                                                                                         | Not applicable                      |
| Reporting bias assessment     | 14     | Describe any methods used to assess risk of bias due to missing results in a synthesis (arising from reporting biases).                                                                                                                                                              | Not applicable                      |
| Certainty assessment          | 15     | Describe any methods used to assess certainty (or confidence) in the body of evidence for an outcome.                                                                                                                                                                                | Not applicable                      |
| <b>RESULTS</b>                |        |                                                                                                                                                                                                                                                                                      |                                     |
| Study selection               | 16a    | Describe the results of the search and selection process, from the number of records identified in the search to the number of studies included in the review, ideally using a flow diagram.                                                                                         | Figure 1 page 6                     |
|                               | 16b    | Cite studies that might appear to meet the inclusion criteria, but which were excluded, and explain why they were excluded.                                                                                                                                                          | Figure 1 page 6                     |
| Study characteristics         | 17     | Cite each included study and present its characteristics.                                                                                                                                                                                                                            | Table 2 – summary of articles pages |
| Risk of bias in studies       | 18     | Present assessments of risk of bias for each included study.                                                                                                                                                                                                                         | Not reported                        |
| Results of individual studies | 19     | For all outcomes, present, for each study: (a) summary statistics for each group (where appropriate) and (b) an effect estimate and its precision (e.g. confidence/credible interval), ideally using structured tables or plots.                                                     | Not applicable                      |
| Results of syntheses          | 20a    | For each synthesis, briefly summarise the characteristics and risk of bias among contributing studies.                                                                                                                                                                               | Not applicable                      |
|                               | 20b    | Present results of all statistical syntheses conducted. If meta-analysis was done, present for each the summary estimate and its precision (e.g. confidence/credible interval) and measures of statistical heterogeneity. If comparing groups, describe the direction of the effect. | Not applicable                      |
|                               | 20c    | Present results of all investigations of possible causes of heterogeneity among study results.                                                                                                                                                                                       | Not applicable                      |
|                               | 20d    | Present results of all sensitivity analyses conducted to assess the robustness of the synthesized results.                                                                                                                                                                           | Not applicable                      |
| Reporting biases              | 21     | Present assessments of risk of bias due to missing results (arising from reporting biases) for each synthesis assessed.                                                                                                                                                              | Not applicable                      |
| Certainty of evidence         | 22     | Present assessments of certainty (or confidence) in the body of evidence for each outcome assessed.                                                                                                                                                                                  | Not applicable                      |
| <b>DISCUSSION</b>             |        |                                                                                                                                                                                                                                                                                      |                                     |
| Discussion                    | 23a    | Provide a general interpretation of the results in the context of other evidence.                                                                                                                                                                                                    | Pages 10 and 11                     |
|                               | 23b    | Discuss any limitations of the evidence included in the review.                                                                                                                                                                                                                      | Pages 11 and 12                     |

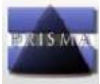

## PRISMA 2020 Checklist

| Section and Topic                              | Item # | Checklist item                                                                                                                                                                                                                             | Location where item is reported |
|------------------------------------------------|--------|--------------------------------------------------------------------------------------------------------------------------------------------------------------------------------------------------------------------------------------------|---------------------------------|
|                                                | 23c    | Discuss any limitations of the review processes used.                                                                                                                                                                                      | Pages 11 and 12                 |
|                                                | 23d    | Discuss implications of the results for practice, policy, and future research.                                                                                                                                                             | Page 12                         |
| <b>OTHER INFORMATION</b>                       |        |                                                                                                                                                                                                                                            |                                 |
| Registration and protocol                      | 24a    | Provide registration information for the review, including register name and registration number, or state that the review was not registered.                                                                                             | Page 3                          |
|                                                | 24b    | Indicate where the review protocol can be accessed, or state that a protocol was not prepared.                                                                                                                                             | Supplemental file               |
|                                                | 24c    | Describe and explain any amendments to information provided at registration or in the protocol.                                                                                                                                            | Not applicable                  |
| Support                                        | 25     | Describe sources of financial or non-financial support for the review, and the role of the funders or sponsors in the review.                                                                                                              | Page 13                         |
| Competing interests                            | 26     | Declare any competing interests of review authors.                                                                                                                                                                                         | Page 13                         |
| Availability of data, code and other materials | 27     | Report which of the following are publicly available and where they can be found: template data collection forms; data extracted from included studies; data used for all analyses; analytic code; any other materials used in the review. | Page 13                         |

From: Page MJ, McKenzie JE, Bossuyt PM, Boutron I, Hoffmann TC, Mulrow CD, et al. The PRISMA 2020 statement: an updated guideline for reporting systematic reviews. *BMJ* 2021;372:n71. doi: 10.1136/bmj.n71  
 For more information, visit: <http://www.prisma-statement.org/>

# BMJ Open

## Triadic communication with teenagers and young adults with cancer: a systematic literature review: "Make me feel like I'm not the third person"

|                                 |                                                                                                                                                                                                                                                                                                                                                                                                                                                                                                                                            |
|---------------------------------|--------------------------------------------------------------------------------------------------------------------------------------------------------------------------------------------------------------------------------------------------------------------------------------------------------------------------------------------------------------------------------------------------------------------------------------------------------------------------------------------------------------------------------------------|
| Journal:                        | <i>BMJ Open</i>                                                                                                                                                                                                                                                                                                                                                                                                                                                                                                                            |
| Manuscript ID                   | bmjopen-2023-080024.R1                                                                                                                                                                                                                                                                                                                                                                                                                                                                                                                     |
| Article Type:                   | Original research                                                                                                                                                                                                                                                                                                                                                                                                                                                                                                                          |
| Date Submitted by the Author:   | 10-Jan-2024                                                                                                                                                                                                                                                                                                                                                                                                                                                                                                                                |
| Complete List of Authors:       | Critoph, Deborah; University of Cambridge, Department of Public Health & Primary Care<br>Taylor, Rachel; University College London Hospitals NHS Foundation Trust, CNMAR;<br>Spathis, Anna; University of Cambridge<br>Duschinsky, Robbie; University of Cambridge<br>Hatcher, Helen; Cambridge University Hospitals NHS Foundation Trust<br>Clyne, Ella; University of Cambridge<br>Kuhn, Isla; University of Cambridge, Medical Library, School of Clinical Medicine<br>Smith, Luke; Cambridge University Hospitals NHS Foundation Trust |
| <b>Primary Subject Heading</b>: | Communication                                                                                                                                                                                                                                                                                                                                                                                                                                                                                                                              |
| Secondary Subject Heading:      | Communication, Oncology, Patient-centred medicine, Paediatrics, Medical education and training                                                                                                                                                                                                                                                                                                                                                                                                                                             |
| Keywords:                       | Adolescents < Adolescent, Decision Making, EDUCATION & TRAINING (see Medical Education & Training), ONCOLOGY                                                                                                                                                                                                                                                                                                                                                                                                                               |
|                                 |                                                                                                                                                                                                                                                                                                                                                                                                                                                                                                                                            |

SCHOLARONE™  
Manuscripts



I, the Submitting Author has the right to grant and does grant on behalf of all authors of the Work (as defined in the below author licence), an exclusive licence and/or a non-exclusive licence for contributions from authors who are: i) UK Crown employees; ii) where BMJ has agreed a CC-BY licence shall apply, and/or iii) in accordance with the terms applicable for US Federal Government officers or employees acting as part of their official duties; on a worldwide, perpetual, irrevocable, royalty-free basis to BMJ Publishing Group Ltd ("BMJ") its licensees and where the relevant Journal is co-owned by BMJ to the co-owners of the Journal, to publish the Work in this journal and any other BMJ products and to exploit all rights, as set out in our [licence](#).

The Submitting Author accepts and understands that any supply made under these terms is made by BMJ to the Submitting Author unless you are acting as an employee on behalf of your employer or a postgraduate student of an affiliated institution which is paying any applicable article publishing charge ("APC") for Open Access articles. Where the Submitting Author wishes to make the Work available on an Open Access basis (and intends to pay the relevant APC), the terms of reuse of such Open Access shall be governed by a Creative Commons licence – details of these licences and which [Creative Commons](#) licence will apply to this Work are set out in our licence referred to above.

Other than as permitted in any relevant BMJ Author's Self Archiving Policies, I confirm this Work has not been accepted for publication elsewhere, is not being considered for publication elsewhere and does not duplicate material already published. I confirm all authors consent to publication of this Work and authorise the granting of this licence.

1  
2  
3 **Triadic communication with teenagers and young adults with cancer: a systematic literature**  
4 **review: “Make me feel like I’m not the third person”**  
5  
6

7 Deborah J Critoph MSc, Rachel M Taylor PhD, Anna Spathis MD, Robbie Duschinsky PhD,  
8 Helen Hatcher MD PhD, Ella Clyne, Isla Kuhn MSc, Luke AM Smith  
9  
10

11 Deborah Critoph, PhD student, Department of Public Health & Primary Care, University of  
12 Cambridge  
13  
14

15  
16 Rachel Taylor, Director of the CNMAR, Centre for Nurse, Midwife and Allied Health Profession  
17 Led Research, University College London Hospitals NHS Foundation Trust, London, NW1 2PG  
18  
19

20 Anna Spathis, Assistant Professor, Department of Public Health and Primary Care, University  
21 of Cambridge  
22  
23

24 Robbie Duschinsky, Professor of Social Science & Health, Department of Public Health &  
25 Primary Care, University of Cambridge  
26  
27

28 Helen Hatcher, Consultant in Medical and TYA Oncology, Clinical and Regional Lead for  
29 Sarcoma and Young People with Cancer, Clinical Director EoE TYAc ODN  
30  
31

32  
33 Ella Clyne, Medical Student, University of Cambridge  
34  
35

36 Isla Kuhn, Head of Medical Library Services, University of Cambridge Medical Library  
37  
38

39 Luke Smith, Junior Clinical Fellow in TYA Haematology and Oncology, Cambridge University  
40 Hospitals NHS Foundation Trust  
41  
42

43 Corresponding author: Deborah Critoph, [dc625@cam.ac.uk](mailto:dc625@cam.ac.uk)  
44  
45

46  
47 Keywords: Teenagers and young adults with cancer (TYAC), adolescents, triadic  
48 communication, communication, supporters, third person, parents, support network, health  
49 care, professionals, experiences, impact.  
50  
51

52 Abstract = 290/300

53 Word count = 4,468

54 Number of tables = 4

55 Number of figures = 1  
56  
57  
58  
59  
60

## Abstract

### Objectives

Clinical communication needs of teenagers and young adults with cancer (TYAC) are increasingly recognised to differ significantly from younger children and older adults. We sought to understand who is present with TYACs, TYACs experiences of triadic communication and its impact. We generated three research questions to focus this review:

1. Who is present with TYACs in healthcare consultations/communication?
2. What are TYACs' experiences of communication with the supporter present?
3. What is the impact of a TYAC's supporter being present in the communication?

### Design

Systematic review with narrative synthesis.

### Data sources

The search was conducted across six databases: Medline, CINAHL, Embase, PsycINFO, Web of Science and AMED for all publications up to December 2023.

### Eligibility criteria for selecting studies

Included papers were empirical research published after 2005; participants had malignant disease, diagnosed aged 13-24 years (for over 50% of participants); the research addressed any area of clinical communication.

### Data extraction and synthesis

Three independent reviewers undertook full text screening. A review-specific data extraction form was used to record participant characteristics and methods from each included paper and results relevant to the three review questions.

### Results

A total of 8,480 studies were identified in the search, of which 36 fulfilled the inclusion criteria. We found that mothers were the most common supporter present in clinical communication encounters. TYACs experiences of triadic communication are paradoxical in nature – the supporter can help or hinder the involvement of the young person in care related communication. Overall, young people are not included in clinical communication and decisions at their preferred level.

### Conclusion

Triadic communication in TYAC care is common, complex, and dynamic. Due to the degree of challenge and nuances raised, HCPs need further training on effective triadic communication.

PROSPERO registration number CRD42022374528

## Strengths & limitations of this study

- We searched systematically and thoroughly for eligible studies, but this is not a well-indexed field of research, and therefore it is possible that some relevant studies were not included in the review.
- We limited the review to a UK TYAC age range and not the broader age used elsewhere, so the conclusions are applicable to younger adults, up to aged 24 only and not necessarily the age of young adulthood used in some countries (between 29 to 39).
- We only included papers published in English and the results may not be applicable to other countries especially where cultural differences affect parental-TYAC or other familial/romantic relational dynamics.
- International representation was seen in the eligible studies and TYAC ages were included across the entirety of the specified UK age range.
- Studies represented the journey throughout the cancer experience from diagnosis to survivorship and end of life care.

## Introduction

Adolescence is a time of transition where young people navigate monumental physical, cognitive, emotional, and behavioural milestones to develop a sense of self-identity and gain independence. Although most young people have limited encounters with healthcare, around 2,500 young people in the United Kingdom (UK) are diagnosed with cancer each year, which is the leading cause of non-traumatic death in young people in the United States (US) and Europe.(1) Teenagers and young adults with cancer (TYACs) have unique healthcare needs and there has been an international drive to develop developmentally appropriate evidence-based specialist care, provided by appropriately trained healthcare professionals (HCPs).(2)

Communication with TYACs can be particularly challenging: a life-limiting condition intersects an age associated with emotional reactivity and variable maturity. TYACs clinical communication needs are increasingly recognised to differ significantly from younger children and older adults. Research indicates TYACs can have little meaningful involvement in conversations with HCPs: almost half of children and young people reported not being involved in decisions about their care.(3) HCPs recognise this and consider young people amongst the hardest patients to communicate with.(4) However, HCPs receive little training about how best to manage these clinical encounters. TYACs perceive that HCPs do not make efforts to understand how their cancer impacts their life outside of the healthcare setting. As a result, they may withdraw and subsequently be labelled as 'challenging', 'hard to reach' and 'disengaged'. This may adversely impact care and contribute to poor physical and psychological outcomes. Despite these issues, there are limited opportunities for formal postgraduate education in communication with TYACs for HCPs, with most training being ad hoc and not interprofessional.(5,6) Effective communication with TYACs has been recognised as a key national research priority. In a UK-wide survey of young patients' own research priorities, communication was a striking cross-cutting theme.(7)

Recent research into clinical communication with TYACs has offered some insight into the complexities of communication with this specialist patient group.(8–12) Yet one area that has

1  
2  
3 received less attention is triadic communication. Triadic communication refers to the  
4 presence of a third party, such as a parent, carer, or companion in clinical encounters (13)  
5 and the presence of such a person was found to occur in 87% of TYAC consultations.(11) As a  
6 commonly occurring form of communication in TYAC care, there is a need to understand the  
7 theoretical basis and relevance of triadic communication to clinical practice. For the purposes  
8 of this review, we refer to this third person as a supporter. Triadic communication literature  
9 from children and older adults exists. (14–17) Notably this includes a meta-analytic review of  
10 provider-patient-companion of adults,(18) one large systematic review of physician-patient-  
11 companion communication and decision-making in adults (19) and one review of doctor-  
12 parent-child communication.(20) Whilst informative, these studies are with children and  
13 adults, not this unique age-group of emerging adulthood with a significant life threatening  
14 diagnosis such as cancer. Also, these studies focus on doctor-patient-third person  
15 communication, whereas TYAC care involves a range of interdisciplinary professionals. This  
16 review aims to understand what is known about triadic communication with TYACs in  
17 healthcare communication.  
18  
19  
20  
21  
22

### 23 **Aim**

24 We sought to understand who is present with TYACs, synthesise TYACs experiences of triadic  
25 communication with HCPs and supporter(s), and develop insights into the impact of triadic  
26 communication for TYACs.  
27  
28  
29

### 30 **Review questions:**

- 31 1. Who is the supporter present with TYACs in healthcare consultations and  
32 communication?
- 33 2. What are TYACs' experiences of communication with the supporter present?
- 34 3. What is the impact on a TYAC's supporter being present in the communication?  
35  
36

### 37 **Methods**

38 We conducted a systematic review and narrative synthesis (21,22) of empirical evidence  
39 published since 2005, the year of publication of the National Institute for Care Excellence  
40 (NICE) Improving Outcomes Guidance, the guidance document underpinning TYAC services in  
41 England.(2) The review protocol was prospectively registered with PROSPERO  
42 (CRD42022374528). We designed the search to identify and map the available evidence using  
43 a broad scope to gain an overview of the pertinent literature, identify knowledge gaps and  
44 clarify concepts. The search strategy was developed and refined with an information scientist  
45 (I.K.). Keywords were generated across five strands detailed in Table 1, with strands combined  
46 with the Boolean operator 'AND'. The search was conducted across six databases: Medline,  
47 CINAHL, Embase, PsycINFO, Web of Science and AMED (supplemental file).  
48  
49  
50  
51  
52  
53  
54  
55  
56  
57  
58  
59  
60



**Table 1. Search Terms**Strand 1 – TYAC

TYA cancer or TYA oncology or teenage and young adult adj5 cancer or teenage and young adult adj5 oncology or teenage\* adj5 cancer or teenage\* adj5 oncology or adolescen\* adj 5 cancer or adolescen\* adj 5 oncology or young people adj 5 cancer or young people adj 5 oncology

Strand 2 – communication

Communication skills OR communicat\* OR discuss\* OR disclos\* OR inform\* OR interact OR relationship building OR decision making OR communication tools OR communication aids OR psychosocial assessment

Strand 3 – supporters

Parent\* or guardian\* or mother\* or father\* or partner or wife or wives or husband\* or boyfriend\* or girlfriend\* or sibling\* or friend\* or carer\* or "third person" or caregiver\* or "care-giver\*" or spouse\* or supporter\* or support network\*.

Strand 4 - impact

affect OR effect OR influence OR result OR resultant OR impact

Strand 5 - experience

encounter OR involvement OR occurrence OR feel OR "go through" OR experience\*

TYAC: teenage and young adult with cancer

Database searches were compiled and de-duplicated in Mendeley, abstracts were screened in Rayyan by two researchers (D.J.C and L.A.M.S.), and 172 full articles were read by three researchers (L.A.M.S., D.J.C., and R.M.T) for eligibility of inclusion in the final analysis, with disagreements resolved by discussion. Papers were included if: they presented empirical research published after 2005; participants had malignant disease, diagnosed aged 13-24 years (for over 50% of participants); the research addressed any area of clinical communication; and the research included supporters (parents, partners, carers, friends etc). Papers were excluded if they were: conference abstracts, unpublished articles, systematic reviews, single case studies, validation research methodology, studies using retrospective documentation in clinical notes, articles focusing on information needs rather than communication skills, or were not in English.

A review-specific data extraction form was used to record participant characteristics and methods from each included paper and results relevant to the three review questions. The final number of included articles totalled 36, the remaining 136 were excluded based on the participants' ages, focus on HCPs or information giving. In tandem to the data extraction process, two members of the review team (E.C. and D.J.C.) independently assessed each paper in terms of its internal validity, appropriateness, and contribution to answering the review questions, using a review-specific version of Gough's Weight of Evidence criteria.(23) Discrepancies in assessment decisions were discussed between reviewers and final scores were agreed through consensus.

Extracted data were entered into Excel to aid the narrative synthesis of the included papers.(21,22) All articles, irrespective of relevance and quality, were included in the review.

1  
2  
3 However, those rated 'medium' and 'high' were given greater weight in the synthesis. An  
4 inductive thematic analysis was undertaken to identify the main, recurrent, and important  
5 data across the studies related to answering each research question. D.J.C. and E.C. explored  
6 heterogeneity across the studies. The integration of results from studies utilising different  
7 methods and epistemological positions was supported by L.A.M.S. and R.M.T., and consensus  
8 in synthesis was reached. The synthesis was further refined through discussion of the review  
9 of results and their implications with clinicians, interdisciplinary academic audiences, and all  
10 of the co-authors.  
11  
12

## 13 Patient and Public Involvement Statement

14  
15  
16  
17 **None**  
18  
19

## 20 Results

21 A total of 8,480 studies were identified in the search, of which 36 fulfilled the inclusion criteria  
22 (Figure 1). The included articles are summarised in Table 2. (table 2 uploaded separately)  
23  
24

25 All points across the cancer trajectory were represented in the final papers: diagnosis (n=7);  
26 (12,24–29) on treatment (n=17); (30–46) end of treatment (completed within one year) (n=2);  
27 (47,48) survivorship (more than one-year post-treatment) (n=2); (5,49) and end of life care  
28 (n=5). (50–54) Three studies included patients at more than one point along the cancer care  
29 continuum. (55–57) Most studies (n=19) were conducted in the US (24,27–29,31,35–37,39–  
30 46,50,52,54) other countries included the UK, (25,32,33) Australia, (38,48,49,57) Norway,  
31 (12,53) Israel, (47) Iran, (30) Mexico, (51) France, (34) Denmark, (26) Korea (56) and Taiwan,  
32 (55) one study recruited from three European countries. (5) Studies used predominantly  
33 qualitative methods (n=32) but there were two mixed methods studies and two using  
34 quantitative methods. Weight of evidence (WoE) criteria indicated five were high evidence,  
35 (24,31,35,45,56) twenty-four were medium (5,12,25,27–30,32–34,36,37,39–42,44,46,47,49–  
36 51,55,57) and seven were low evidence. (26,38,43,48,52–54) We used Gough's review  
37 specific criteria to weight the quality of each paper. (23) To do this, we used three parameters:  
38  
39

- 40 A) The integrity of the evidence on its own terms
  - 41 B) The appropriateness of the method for answering the review questions
  - 42 C) The appropriateness of the focus or relevance for answering the review questions
- 43  
44  
45

46 Each of the above was either rated as low, medium, or high. These 3 parameters were  
47 combined to create WoE D which was the overall rating seen above and is the extent to which  
48 a study contributes evidence to answering the review questions. Factors that made the  
49 method highly appropriate included the use of semi-structured interviews to understand  
50 TYAC experiences and speaking to the TYAC and supporter separately. The high scoring papers  
51 included papers that focussed on communication in the triad, but this only occurred in 10  
52 papers. In 9 papers the age at diagnosis was not specified and this decreased the weighting  
53 of these papers. (5,34–36,50–54)  
54  
55

56 Of the included studies just less than one third researched the triad (n=10) of TYAC,  
57 supporters and HCP (5,24,30–32,34–36,50,51), one third TYAC only (n=12)  
58  
59  
60

(28,29,33,37,38,40–42,44–46,48) and just over a third TYAC and supporters (n=14). (12,25–27,39,43,47,49,52–57)

Table 3 Study population

*Participants included in the study and numbers of papers included for each of the three participant groups*

| Triad? Dyad? Single? | Who is studied in the paper? | Number of papers |
|----------------------|------------------------------|------------------|
| Triad                | TYAC, supporter, HCA         | 10               |
| Dyad                 | TYAC and supporter           | 14               |
| Single               | TYAC only                    | 12               |

The categories used to separate the age groups were lower adolescence (11-14 years), middle adolescence (15-17 years), upper adolescence (18-21 years) and emerging adulthood (22 onwards). Of the papers where the age range at diagnosis could be deduced, the majority of these (21 out of 24) spanned three or more age categories. All the papers spanned two or more age categories. In nine of the papers, the age ranges at diagnosis were not available (as age at diagnosis was expressed as a mean or median). Given these factors, it is difficult to ascertain whether any between age group differences exist.

#### Who is present with TYACs in healthcare consultations and communication?

The majority of supporters were mothers (68.9%). When combined, parents represented nearly all the supporters in the included studies (94.6%), see Table 4. Non-parental supporters (1.8%) included partners, sisters, aunts, and grandmothers. The remaining supporters were not categorised due to insufficient information in the article's demographics data (3.9%).(53,54)

Table 4 Supporter Demographics

*Details of the supporter demographics and percentages of within the included publications*

| Supporter type                     | Number of supporters | Percentage quoted to 1 decimal place (%) |
|------------------------------------|----------------------|------------------------------------------|
| "Mother"                           | 453                  | 68.9                                     |
| "Father"                           | 128                  | 19.5                                     |
| "Both parents"                     | 20                   | 3.0                                      |
| "Parents" no further specification | 20                   | 3.0                                      |
| "Stepmother"                       | 1                    | 0.2                                      |
| "Grandmother"                      | 2                    | 0.3                                      |
| "Sister"                           | 3                    | 0.5                                      |
| "Partner"                          | 3                    | 0.5                                      |

|                                       |     |       |
|---------------------------------------|-----|-------|
| "Aunt"                                | 3   | 0.5   |
| "Supporters" no further specification | 21  | 3.2   |
| "Other"                               | 3   | 0.5   |
| Total                                 | 657 | 100.1 |

### What are TYACs' experiences of communication with the supporter present?

The presence of supporters was concurrently helpful and challenging for TYACs. Supporters undertook several helpful roles and responsibilities: they asked questions on behalf of the TYAC, retained information from HCPs, acted as a conduit of information between the TYAC and HCP, and acted as a "sounding board" for the young person.(25,31,45) Some supporters promoted self-advocacy and autonomy for the young person.(27,39,41,46,57) Some reported symptoms on their behalf (45) and proactively negotiated changes to treatment schedules in the interest of the young person.(39)

Findings also suggested that young people could experience limited or ineffective communication in the presence of a supporter. Communication could be directed towards the supporter, not the young person.(27,29,31,36) Supporters could receive information in the absence of the TYAC and subsequently filter the content before delivering the information to TYACs.(30,33,34,55,56): *"The parents had hidden a truth that was not theirs to hide"*p533.(34) This reflected the broader predicament that supporters' priorities at times might have competed with those of young people. (25,34,50,51) Supporters could dominate the communication encounter, for instance, parents were seen to interrupt young people, especially when time was limited. (51) Frederick et al found the mean time for adolescent to clinician communication was only 5.5% of the total consultation and parent conversation turns directed towards clinicians comprised a mean of 37.5% of all conversation turns. Clinicians directed most communication at the parent rather than the adolescent and spoke for 66.9% of the conversation and none of the clinicians offered patients the opportunity to speak with them alone. (35)

Mutual protectionism appeared to occur, with TYACs and supporters seeking to protect each other from difficult information leading to non-disclosure when both were present. A diagnosis of cancer is devastating for the young person, supporter(s), family, and the wider social network. Repeatedly, there were references to reduced disclosure between the young person and their supporter, in an attempt to shield each other from emotional distress.(12,31,36,38,39,41,45,53,56) TYACs could experience discomfort and guilt in seeing parents tearful and worried, and felt a burden in response to observing the emotions of supporters.(38,39,52) Some TYACs sought to limit this by withholding concerns to protect their supporters: *"I couldn't talk to mum about my concerns because I didn't want to hurt her"* p 37.(38) In equal measure, supporters were characterised as working hard to stay in control of emotions, be strong and stay in the "now", and they channelled energy into helping.(12,31,56) Yet this could contribute to an environment of non-disclosure that had the potential to create future communication challenges, such as supporters not knowing the young person's wishes. Examples of this were evident within the end of life care

1  
2  
3 studies.(52,53) Friebert et al found that 86% of young people wanted to receive prognostic  
4 information as soon as possible but only 39% of families knew that.(52) Similarly, Jacobs et al  
5 found that young people's end of life wishes were not known by their families.(53) In  
6 instances where the young person may not be able to communicate, it may help families  
7 relieve the impossible burden of making difficult decisions or feelings of regret, if the young  
8 person's perspective and wishes are known.(54)  
9  
10

### 11 **What is the impact of a TYAC's supporter being present in the communication?**

12  
13  
14 Supporters have the potential to facilitate, complicate or obstruct the young person's  
15 involvement in decision-making. Involvement had a positive impact on recall,(42) and may  
16 improve autonomy, efficacy, adherence, and future self-management.(24,57) However, the  
17 participation of supporters may be experienced as stressful by TYAC as they may become side-  
18 lined. (25,40,55) The presence of supporters impacted the young person's level of  
19 involvement in decision-making in several ways. In some cases, supporters empowered TYACs  
20 to make decisions by withholding their opinion (27) and deferring the final decision to  
21 TYACs.(31) However, supporters and TYACs did not perceive decision-making in the same  
22 way.(47,56) Supporters believed that young people oversaw decisions about their care;  
23 however, this was not what young people recounted.(24) TYACs reported a lack of  
24 communication and limited involvement in decisions (24,29,30,46) associated later with  
25 decisional regret.(24,37)  
26  
27  
28  
29

30 Deferral of communication and decisions from the young person to supporters was  
31 commonplace.(27,31,36) When supporters responded to this pathway of communication,  
32 young people then did not see a need to participate in decisions, knowing that their supporter  
33 was taking the mantle.(36) In parallel, clinicians were found to direct communication towards  
34 supporters and in extreme cases young people were completely excluded from  
35 communication and decisions. (29,30,35,47) An atmosphere characterised by a lack of trust,  
36 unanswered questions and uncertainty contributed to the exclusion of young people who  
37 then sought information from other sources.(30,36,39,56) Not allowing TYACs to choose their  
38 involvement in decision-making violated their autonomy, and increased distrust or  
39 resentment of providers and supporters and resulted in lower treatment  
40 adherence.(30,36,39)  
41  
42  
43  
44

45 The decisional involvement preferences of young people were not static: they were context  
46 and environment dependent. At diagnosis, heightened emotions and poor health rendered  
47 young people unable to engage in communication. (24,25,27,29,31,37,41) TYACs expressed a  
48 desire to be involved in decision making at different levels: some wanted limited involvement  
49 from their supporter(s) so they could take the leading role in consultations and their care;(58)  
50 several wanted collaboration with supporters and clinicians;(26,27,44,57) and some  
51 completely relied on supporters and HCP's to make decisions on their behalf.(45,46) Davies  
52 et al described this as agency, the ability to make free and independent choices. They  
53 highlighted the normality of this fluctuation between personal (acting independently), proxy  
54 (decisions made on behalf of someone) and collective (decisions are shared) decision making.  
55 Whilst this was not always linear, it was part of the cancer trajectory and demonstrated the  
56 fluctuating personal agency for TYACs.(32) Some young people reported that supporters and  
57 clinicians decided on the their level of involvement in communication and decision-  
58  
59  
60

1  
2  
3 making,(55) and TYACs commented that they did not feel the decision was theirs.(47)  
4 Decisional involvement was an interactive, complex, and multifaceted process within the  
5 context of the triad, and young people often wanted to be in control of their level of  
6 involvement.(28,31) The evidence highlighted that in the presence of a supporter, young  
7 people's choice in the their level of involvement in decisions was challenged and not routinely  
8 achieved.  
9  
10

11  
12 Most TYACs felt that it was important for the healthcare team to communicate with them  
13 directly and openly.(30,31,33,38,39,49,50) Time alone helped facilitate communication  
14 between TYAC and HCP, to ensure that the young person's needs were fully met.(31,36)  
15 However, time alone with HCPs was not routinely integrated as a part of consultations with  
16 TYACs. (35,48) In fact, clinicians were reported as frequently speaking more to parents and  
17 TYACs received limited communication from HCPs.(27,31,35,36) In the presence of  
18 supporters, as well as withholding concerning information, young people reported feeling  
19 discomfort when discussing sensitive topics such as sex or fertility preservation.(27,36)  
20  
21

22  
23 Young people wanted time alone to communicate with HCPs directly for a variety of reasons.  
24 This private line of communication offered a sense of personal agency and allowed them to  
25 feel "in the loop" and promoted a sense of autonomy that was threatened by the cancer  
26 diagnosis, particularly at the point of diagnosis.(32,50) Young people wanted space to think  
27 and privacy during the cancer journey; private lines of communication with HCPs actively  
28 promoted this.(31,39,45,46) It also enabled HCPs to get to know the young person and  
29 allowed them to ask questions that they may be reluctant to ask in the presence of their  
30 supporter, because of embarrassment or emotional shielding.(31) Darabos et al found that  
31 87.5% of oncology providers considered it important to talk to the TYAC without their parents  
32 present.(31) Whilst the importance has been highlighted within the data it is also evident that  
33 this does not happen as part of routine clinical practice. This could be for several reasons such  
34 as not wanting to challenge rules of authority, uncertainty around how best to ask a parent  
35 to leave and lack of confidence when communicating with a young person alone.  
36  
37  
38  
39  
40  
41  
42

## 43 Discussion

### 44 Principal Findings

#### 45 Who is present with TYACs in healthcare consultations and communication? For example, who are 46 the supporters?

47  
48 The included papers in our review demonstrated that most supporters were parents, more  
49 commonly mothers. The frequent presence of mothers in consultations is consistent with  
50 previous findings. For example, in a UK study in which TYAC nominated a caregiver, 85% were  
51 parents, and of those 80% were female.(59) We note that there is a paucity of data for non-  
52 parental supporters, and this may represent a reality of clinical practice or a bias towards  
53 TYAC-parental dyads over other relational-dyads in this field of research to date.  
54  
55  
56  
57  
58  
59

#### 60 What are TYACs' s present?

1  
2  
3 TYACs experienced supporters facilitating communication by obtaining information, asking  
4 questions, advocating, and supporting personal agency of the young person; conversely  
5 supporters could hinder communication by gatekeeping information, or dominating  
6 communication and thereby rendering young people as bystanders. Young people  
7 experienced negative emotions in response to witnessing their supporters in distress.  
8  
9

### 11 **What is the impact of a TYAC's supporter being present in the communication?**

12 Bidirectional non-disclosure was a coping strategy used by both TYACs and supporters to  
13 protect one another from concerns and emotional burden. This limited HCPs ability to  
14 effectively assess ideas, concerns, and expectations from both parties when together. In the  
15 presence of supporters some young people were less informed, which could impair their  
16 ability to engage in decision-making conversations.  
17  
18  
19

### 20 **Meaning of the study**

21  
22  
23 This is the first review to look specifically at triadic communication in teenagers and young  
24 adults with cancer and has demonstrated that there is a paucity of evidence focussed  
25 specifically on triadic communication with TYACs. Of the thirty-six studies in the review less  
26 than one third included all three parties in the triadic communication encounter. However,  
27 the review has enabled us to provide answers to the review questions and identify knowledge  
28 gaps, including a lack of theory describing triadic communication. Some preliminary  
29 theoretical models, such as family involvement in interpersonal healthcare processes,(60)  
30 depict the interaction pathways between patients, families and HCP and hypothesise the  
31 influence of family on interpersonal processes and outcomes of medical consultations.  
32  
33  
34

35  
36 The data has clearly identified that parents are the predominating supporter for TYACs, which  
37 may be surprising given the inclusion of participants up to the age of 25. Parents can play a  
38 significant role when a young person is diagnosed with cancer. Developmentally, a major  
39 characteristic that differentiates TYACs from younger children or older adults is the  
40 progressive increase in their desire and capacity for independence, personal agency, and  
41 autonomy. This process is disrupted by a cancer diagnosis: increased parental presence can  
42 be perceived as intrusive and reflect reversion to an earlier family dynamic, anchoring TYACs  
43 in dependency, restricting self-exploration, and limiting their developing of an internal value  
44 and belief system.(38,61–63) This has been phrased as 'retreating to family' and can  
45 negatively impact peer relationships by impeding development and maintenance of a peer  
46 network.(40,64,65) Young people may often be accepting of this, particularly in the early  
47 stages of the cancer diagnosis. However, as this review demonstrates, the presence of parents  
48 alters the experience and impact of communication with HCPs. It is important to highlight  
49 that there is limited literature on TYAC communication encounters with supporters other than  
50 parents.(62,66,67) Partners felt relegated to a non-participatory role by a parent, and  
51 mothers struggled to relinquish their existing role as primary supporter.(62,67) It is relevant  
52 to note that the participants in these three studies were in their early 20's.  
53  
54  
55  
56  
57

58 A key impact of triadic communication is that young people may not be involved in decision  
59 making to the level they want. This is consistent with related paediatric oncology literature  
60

1  
2  
3 which consistently reports children's limited participation in decision-making. (68–70)  
4 Clinicians attempted to protect children from 'too much' information because of the  
5 perception that children are not capable or too vulnerable.(17) The important difference  
6 between paediatric and TYAC populations are the legal and ethical obligations towards TYACs  
7 who are autonomous, capacitous patients rather than to parents with parental responsibility.  
8  
9

10  
11 The findings of this review demonstrate the presence of a supporter impacts the involvement  
12 of young people in healthcare decisions. Therefore, there are legal and ethical issues, which  
13 are critically important, both in research and clinically in TYAC care particularly related to  
14 informed consent, capacity, and autonomy. The law relating to children and young people is  
15 complex and differs across the UK and internationally. The General Medical Council guidelines  
16 in the UK state, "the patient must be the first concern".(71) HCPs have ethical and legal  
17 obligations outlined in UK best practice guidance, statute, and case law.(72) In the UK, parents  
18 can legally make decisions for children under 16 years unless the child disagrees and is  
19 deemed 'Gillick Competent'.(73) Moreover, studies have shown children aged 14 and older  
20 can approach the level of understanding of adults.(74,75) In contrast, people aged 16 and  
21 above are legally able to make decisions for themselves in the UK and are automatically  
22 assumed to have capacity (76) and therefore, HCPs must communicate with them in  
23 developmentally appropriate ways. Clinicians face a challenge in identifying the best way to  
24 communicate with TYACs and their supporter (s). TYACs need parental involvement whilst  
25 simultaneously desiring autonomy (36) necessitating careful balancing of the needs of both  
26 parties to ensure that the young person is not relegated to a non-participant status.  
27  
28  
29  
30

### 31 **Strengths and weaknesses**

32  
33  
34 Our review had a number of limitations. We searched systematically and thoroughly for  
35 eligible studies, but this is not a well-indexed field of research, and therefore it is possible that  
36 some relevant studies were not included in the review. We limited the review to a UK TYAC  
37 age range and not the broader age used elsewhere, so the conclusions are applicable to  
38 younger adults, up to aged 24 only and not necessarily the age of young adulthood used in  
39 some countries (between 29 to 39). We also only included papers published in English and  
40 therefore papers reflect practices in primarily North America, Australia and Europe, the  
41 results may not be applicable to other countries especially where cultural differences affect  
42 parental-TYAC or other familial/romantic relational dynamics and where the healthcare  
43 culture may be different, e.g., more paternalistic. Despite these limitations, international  
44 representation was seen in the eligible studies, TYAC ages were included across the entirety  
45 of the specified UK age range and studies represented the journey throughout the cancer  
46 experience.  
47  
48  
49  
50

### 51 **Implications for clinicians and policy makers**

52  
53  
54 Given the degree of challenge and nuance raised, HCPs need training on effective triadic  
55 communication. Fourneret concluded that the relationship between TYACs, their parents and  
56 HCPs "as being the most difficult one in oncology".(34) Professionals described challenges  
57 communicating with both TYACs and parents, especially when loyalties were torn between  
58 the two.(5) However, training is currently ad hoc and not interdisciplinary.(77–80)  
59  
60



1  
2  
3 Furthermore, HCPs can find it difficult to apply teaching in this area in clinical practice.(53,81)  
4 HCPs need education and training to navigate triadic communication to optimise involvement  
5 of the young person whilst attending to a supporter's needs. Experiential learning is the gold  
6 standard in teaching methods for clinical communication and is designed to bring about  
7 changes in learners' skills. These evidence-based methods are through small group, problem-  
8 based simulation in a classroom, with repeated practise and rehearsal of skills under  
9 observation with detailed and descriptive feedback. This is arguably warranted here.(82,83)  
10  
11

12  
13 Triadic communication is a key feature of TYAC care but requires further attention and  
14 inclusion in future iterations of key policy documents and guidelines such as the Blueprint of  
15 Care (BoC).(84) The BoC is a UK document that helps shape and deliver developmentally  
16 appropriate care to TYAC. However, it is recognised that age is poorly correlated with  
17 developmental maturity and therefore any communication framework needs to be specific  
18 to TYACs, recognising the transitional nature of adolescence meaning a one size fits all  
19 approach is likely inadequate.  
20  
21

### 22 23 **Unanswered questions and future research**

24  
25  
26 Future research is warranted to triangulate triadic perspectives and understand more about  
27 the interactional dynamics of these complex communication encounters. A key research need  
28 is investigating how best to support decision-making whilst engaging supporters,  
29 understanding their priorities and information needs may conflict.(31,36,37,40) Conflict  
30 management must also be understood in the emotional context of young adult oncology. How  
31 to effectively educate HCPs to communicate within the triad, to ensure the young person and  
32 the supporters needs are met is a priority. This needs to include how best we facilitate time  
33 alone between young patients and HCPs. Continued development and utilisation of  
34 comprehensive triadic theoretical frameworks may provide guidance and direction for future  
35 research, allowing for greater integration and progress with this diverse research area and  
36 commonly occurring form of healthcare communication.  
37  
38  
39

### 40 41 **Conclusion**

42  
43 Triadic communication is a pivotal component of communicating with TYACs and the  
44 presence of supporters impacts clinical communication both positively and negatively. Young  
45 people desire a sense of personal agency, autonomy and control related to information flow  
46 and decision making. This includes private lines of communication with HCPs without the  
47 presence of supporters. HCPs recognise the importance of time alone with young people;  
48 however this does not translate to clinical practice. Therefore, further research on  
49 communication dynamics is needed to allow for the development of bespoke, TYAC focussed  
50 clinical communication training for HCPs to allow them to effectively facilitate and navigate  
51 triadic communication. This then needs to be formally embedded in national guidance and  
52 postgraduate training for HCPs working in TYAC care to allow equitable access for TYACs.  
53  
54  
55  
56  
57  
58  
59  
60

1  
2  
3  
4  
5 Author Contributions:

6 DC, LS and RT were involved in developing the protocol; DC, IK and LS coordinated the running  
7 of the study and were responsible for data acquisition; DC, LS, RT and EC contributed to the  
8 analysis; DC drafted the manuscript. All authors have critically reviewed the manuscript for  
9 important intellectual content and have read and agreed to the published version of the  
10 manuscript. All authors agree to be accountable for all aspects of the work in ensuring that  
11 questions related to the accuracy or integrity of any part of the work are appropriately  
12 investigated and resolved.  
13  
14

15 Conflicts of Interest:

16 The authors declare no conflict of interest.  
17  
18

19 Ethics Approval:

20 This was a systematic review and therefore ethics approval was not required.  
21  
22

23 Funding:

24 This paper presents work supported by the Wellcome Trust, (grant number G115288) under  
25 its Programme PhD for healthcare professionals course awarded to the first author Deborah  
26 Critoph, University of Cambridge. R.M.T. is partially funded through UCLH Charity. The views  
27 expressed are those of the author (s) and not necessarily those of the Wellcome Trust or UCLH  
28 Charity.  
29  
30

31 Data availability statement:

32 All data relevant to the study are included in the article or uploaded as supplementary  
33 information. No previously unpublished primary data are included in the paper. All data  
34 relevant to the systematic review are included in the paper or uploaded as supplementary  
35 information.  
36  
37  
38  
39

40 Figure Legends:

41  
42 Figure 1: PRISMA Flow diagram  
43  
44

45 Table 1: Search terms  
46  
47

48 Table 2: Summary of articles  
49  
50

51 Table 3: Study Population

52 *Participants included in the study and numbers of papers included for each of the three*  
53 *participant groups*  
54

55 Table 4: Supporter Demographics

56 *Details of the supporter demographics and percentages of within the included publications*  
57  
58  
59  
60

## References:

1. Cancer Research UK. Young peoples' cancers incidence statistics [Internet]. 2016 [cited 2019 Jul 10]. Available from: <https://www.cancerresearchuk.org/health-professional/cancer-statistics/young-people-cancers/incidence>
2. National Institute of Health and Clinical Excellence. Guidance on Cancer Services Improving Outcomes in Children and Young People with Cancer National Institute for Health and Clinical Excellence [Internet]. Nice. 2005. 198 p. Available from: <https://www.nice.org.uk/guidance/csg7/resources/improving-outcomes-in-children-and-young-people-with-cancer-update-pdf-773378893>
3. Care Quality Commission., NHS Patient Survey Programme. 2018 Children and Young People's patient experience survey. Statistical Release. 2019;(November).
4. White B, Viner RM. Improving communication with adolescents. *Arch Dis Child Educ Pract Ed*. 2012;97(3):93–7.
5. Essig S, Steiner C, Kuehni CE, Weber H, Kiss A. Improving Communication in Adolescent Cancer Care: A Multiperspective Study. *Pediatr Blood Cancer* [Internet]. 2016;63(8):1423–30. Available from: [http://onlinelibrary.wiley.com/journal/10.1002/\(ISSN\)1545-5017](http://onlinelibrary.wiley.com/journal/10.1002/(ISSN)1545-5017)
6. Lea S, Gibson F, Taylor RM. Holistic Competence": How Is it Developed, Shared, and Shaped by Health Care Professionals Caring for Adolescents and Young Adults with Cancer? *J Adolesc Young Adult Oncol*. 2021;10(5):503–11.
7. Gibson F, Aldiss S, Fern LA, Phillips B, Gravestock H, Malik S, et al. Reporting the whole story: Analysis of the "out-of-scope" questions from the James Lind Alliance Teenage and Young Adult Cancer Priority Setting Partnership Survey. *Health Expect*. 2021;
8. Smith LAM, Critoph DJ, Hatcher HM. How Can Health Care Professionals Communicate Effectively with Adolescent and Young Adults Who Have Completed Cancer Treatment? A Systematic Review. *J Adolesc Young Adult Oncol* [Internet]. 2020 Jan 14; Available from: <https://doi.org/10.1089/jayao.2019.0133>
9. Reid J, McKeaveney C, Martin P. Communicating with Adolescents and Young Adults about Cancer-Associated Weight Loss. *Curr Oncol Rep*. 2019;21(2):6.
10. Phillips CR, Haase JE. A Connectedness Primer for Healthcare Providers: Adolescents/Young Adult Cancer Survivors' Perspectives on Behaviors That Foster Connectedness during Cancer Treatment and the Resulting Positive Outcomes. *J Adolesc Young Adult Oncol* [Internet]. 2018;7(2):174–80. Available from: <http://www.liebertpub.com/products/product.aspx?pid=387>
11. Mellblom A V, Finset A, Korsvold L, Loge JH, Ruud E, Lie HC. Emotional concerns in follow-up consultations between paediatric oncologists and adolescent survivors: a video-based observational study. *Psychooncology* [Internet]. 2014 Dec;23(12):1365–72. Available from: <https://search.ebscohost.com/login.aspx?direct=true&AuthType=athens&db=cin20&AN=109768272&site=ehost-live>
12. Korsvold L, Mellblom AV, Finset A, Ruud E, Lie HC. A content analysis of emotional concerns expressed at the time of receiving a cancer diagnosis: An observational study of consultations with adolescent and young adult patients and their family members. *European Journal of Oncology Nursing* [Internet]. 2017;26:1–8. Available

- 1  
2  
3 from:  
4 [https://search.ebscohost.com/login.aspx?direct=true&AuthType=sso&db=cin20&AN=](https://search.ebscohost.com/login.aspx?direct=true&AuthType=sso&db=cin20&AN=120589318&site=ehost-live&custid=ns123475)  
5 [120589318&site=ehost-live&custid=ns123475](https://search.ebscohost.com/login.aspx?direct=true&AuthType=sso&db=cin20&AN=120589318&site=ehost-live&custid=ns123475)  
6  
7 13. Ward A, Critoph D, Westacott R, Williams R, Dogra N. A collaboration on teaching and  
8 assessing triadic consultation skills. *PEC Innovation* [Internet].  
9 2022;1(October):100091. Available from:  
10 <https://doi.org/10.1016/j.pecinn.2022.100091>  
11  
12 14. van Staa AL. Unraveling triadic communication in hospital consultations with  
13 adolescents with chronic conditions: The added value of mixed methods research.  
14 *Patient Educ Couns*. 2011;82(3):455–64.  
15  
16 15. Cahill P, Papageorgiou A. Triadic communication in the primary care paediatric  
17 consultation: A review of the literature. *British Journal of General Practice*.  
18 2007;57(544):904–11.  
19  
20 16. Maras M. Hidden in plain sight. *Int J Psychiatry Med*. 2022;57(6):481–5.  
21  
22 17. Young B, Dixon-woods M, Windridge KC, Heney D. Study of Patients and Parents. *Br*  
23 *Med J*. 2003;326(7384):305.  
24  
25 18. Wolff JL, Roter DL. Family presence in routine medical visits: A meta-analytical review.  
26 *Soc Sci Med* [Internet]. 2011;72(6):823–31. Available from:  
27 <http://dx.doi.org/10.1016/j.socscimed.2011.01.015>  
28  
29 19. Laidsaar-Powell RC, Butow PN, Bu S, Charles C, Gafni A, Lam WWT, et al. Physician-  
30 patient-companion communication and decision-making: A systematic review of  
31 triadic medical consultations. *Patient Educ Couns*. 2013;91(1):3–13.  
32  
33 20. Tates K, Meeuwesen L. Doctor-parent-child communication. A (re)view of the  
34 literature. *Soc Sci Med*. 2001;52(6):839–51.  
35  
36 21. Popay J, Roberts, H SA et al. Guidance on the Conduct of Narrative Synthesis in  
37 Systematic Reviews.  
38  
39 22. Petticrew M RH. Systematic Reviews in the social sciences. In: *Systematic reviews in*  
40 *the social sciences* [Internet]. Available from:  
41 <https://onlinelibrary.wiley.com/doi/book/10.1002/9780470754887>  
42  
43 23. Gough D. *Weight of Evidence: a framework for the appraisal of the quality and*  
44 *relevance of evidence*. 2007 [cited 2023 Jul 2]; Available from:  
45 <https://www.tandfonline.com/action/journalInformation?journalCode=rred20>  
46  
47 24. Barakat LP, Schwartz LA, Reilly A, Deatrick JA, Balis F. A Qualitative Study of Phase III  
48 Cancer Clinical Trial Enrollment Decision-Making: Perspectives from Adolescents,  
49 Young Adults, Caregivers, and Providers. *J Adolesc Young Adult Oncol*. 2014;3(1):3–  
50 11.  
51  
52 25. Hart RI, Cameron DA, Cowie FJ, Harden J, Heaney NB, Rankin D, et al. The challenges  
53 of making informed decisions about treatment and trial participation following a  
54 cancer diagnosis: a qualitative study involving adolescents and young adults with  
55 cancer and their caregivers. *BMC Health Serv Res*. 2020;20(1).  
56  
57 26. Ingersgaard MV, Tulstrup M, Larsen HB, Schmiegelow Kjeld AO - Ingersgaard MVO  
58 <http://orcid.org/0000000270372104>. A qualitative study of decision-making on  
59 Phase III randomized clinical trial participation in paediatric oncology: Adolescents'  
60 and parents' perspectives and preferences. *J Adv Nurs*. 2018;74(1):110–8.  
27. Olsavsky AL, Theroux CI, Dattilo TM, Klosky JL, O'Brien SH, Quinn GP, et al. Family  
communication about fertility preservation in adolescent males newly diagnosed with  
cancer. *Pediatr Blood Cancer*. 2021;68(7).

- 1
  - 2
  - 3
  - 4
  - 5
  - 6
  - 7
  - 8
  - 9
  - 10
  - 11
  - 12
  - 13
  - 14
  - 15
  - 16
  - 17
  - 18
  - 19
  - 20
  - 21
  - 22
  - 23
  - 24
  - 25
  - 26
  - 27
  - 28
  - 29
  - 30
  - 31
  - 32
  - 33
  - 34
  - 35
  - 36
  - 37
  - 38
  - 39
  - 40
  - 41
  - 42
  - 43
  - 44
  - 45
  - 46
  - 47
  - 48
  - 49
  - 50
  - 51
  - 52
  - 53
  - 54
  - 55
  - 56
  - 57
  - 58
  - 59
  - 60
28. Weaver MS, Baker JN, Gibson D V, Gattuso JS, Hinds PS, Gibson D V, et al. “Being a good patient” during times of illness as defined by adolescent patients with cancer. *Cancer* [Internet]. 2016 Jul 15;122(14):2224–33. Available from: [http://onlinelibrary.wiley.com/journal/10.1002/\(ISSN\)1097-0142](http://onlinelibrary.wiley.com/journal/10.1002/(ISSN)1097-0142)
29. Mobley EM, Thomas SM, Brailsford J, Ochoa CY, Miller K, Applebaum A, et al. Clinical Trial Participation: A Qualitative Study of Adolescents and Younger Adults Recently Diagnosed with Cancer. *J Adolesc Young Adult Oncol*. 2023 Jun 1;12(3):303–13.
30. Bahrami M, Namnabati M, Mokarian F, Oujian P, Arbon P. Information-sharing challenges between adolescents with cancer, their parents and health care providers: a qualitative study. *Supportive Care in Cancer* [Internet]. 2017;25(5):1587–96. Available from: <https://search.ebscohost.com/login.aspx?direct=true&AuthType=athens&db=cin20&AN=122279626&site=ehost-live>
31. Darabos K, Berger AJ, Barakat LP, Schwartz LA. Cancer-Related Decision-Making Among Adolescents, Young Adults, Caregivers, and Oncology Providers. *Qual Health Res*. 2021 Nov 1;31(13):2355–63.
32. Davies J, Kelly D, Hannigan B. “Life then”, “life interrupted”, “life reclaimed”: The fluctuation of agency in teenagers and young adults with cancer. *Eur J Oncol Nurs*. 2018;36(100885136):48–55.
33. Fern LA, Taylor RM, Whelan J, Pearce S, Grew T, Brooman K, et al. The Art of Age-Appropriate Care. *Cancer Nurs* [Internet]. 2013;36(5):E27–38. Available from: <https://search.ebscohost.com/login.aspx?direct=true&AuthType=athens&db=cin20&AN=110243702&site=ehost-live>
34. Fournoret E. Breaking Bad News about Cancer to Adolescents and Young Adults: The French Experience. *J Law Med* [Internet]. 2018 [cited 2021 Nov 22];25(2):530–7. Available from: <https://pubmed.ncbi.nlm.nih.gov/29978652/>
35. Frederick NN, Mack JW. Adolescent patient involvement in discussions about relapsed or refractory cancer with oncology clinicians. *Pediatr Blood Cancer* [Internet]. 2018;65(4):1. Available from: <https://search.ebscohost.com/login.aspx?direct=true&AuthType=athens&db=cin20&AN=128132562&site=ehost-live>
36. Hong MK, Wilcox L, Machado D, Olson TA, Simoneaux SF. Care Partnerships: Toward Technology to Support Teens’ Participation in Their Health Care. *Proc SIGCHI Conf Hum Factor Comput Syst* [Internet]. 2016 May 7 [cited 2018 Jun 2];2016:5337–49. Available from: <http://www.ncbi.nlm.nih.gov/pubmed/28164178>
37. Mack JW, Fasciano KM, Block SD. Adolescent and Young Adult Cancer Patients’ Experiences With Treatment Decision-making. *Pediatrics*. 2019;143(5).
38. Patterson P, Millar B, Desille N, McDonald F. The Unmet Needs of Emerging Adults With a Cancer Diagnosis A Qualitative Study. *Cancer Nurs*. 2012;35(3):E32–40.
39. Pennant S, Lee SC, Holm S, Triplett KN, Howe-Martin L, Campbell R, et al. The Role of Social Support in Adolescent/Young Adults Coping with Cancer Treatment. *Children* [Internet]. 2020;7(1):1–25. Available from: <https://search.ebscohost.com/login.aspx?direct=true&AuthType=athens&db=cin20&AN=142468088&site=ehost-live>
40. Pyke-Grimm KA, Franck LS, Halpern-Felsher B, Goldsby RE, Rehm RS. 3 Dimensions of Treatment Decision Making in Adolescents and Young Adults With Cancer. *Cancer Nurs* [Internet]. 2020 Nov;43(6):436–45. Available from:

- 1  
2  
3  
4 <https://search.ebscohost.com/login.aspx?direct=true&AuthType=athens&db=cin20&AN=146822019&site=ehost-live>
- 5  
6 41. Pyke-Grimm KA, Franck LS, Halpern-Felsher B, Goldsby RE, Rehm RS. Day-to-Day  
7 Decision Making by Adolescents and Young Adults with Cancer. *Journal of Pediatric*  
8 *Hematology/Oncology Nursing* [Internet]. 2022;39(5):290–303. Available from:  
9 [https://ovidsp.ovid.com/athens/ovidweb.cgi?T=JS&CSC=Y&NEWS=N&PAGE=fulltext&](https://ovidsp.ovid.com/athens/ovidweb.cgi?T=JS&CSC=Y&NEWS=N&PAGE=fulltext&D=medl&AN=35538622)  
10 [https://cambridge-](https://cambridge-primo.hosted.exlibrisgroup.com/openurl/44CAM/44CAM_services_page?sid=OVID:medline&id=pmid:35538622&id=doi:10.1177%2F27527530211068718&issn=)  
11 [primo.hosted.exlibrisgroup.com/openurl/44CAM/44CAM\\_services\\_page?sid=OVID:m](https://cambridge-primo.hosted.exlibrisgroup.com/openurl/44CAM/44CAM_services_page?sid=OVID:medline&id=pmid:35538622&id=doi:10.1177%2F27527530211068718&issn=)  
12 [edline&id=pmid:35538622&id=doi:10.1177%2F27527530211068718&issn=](https://cambridge-primo.hosted.exlibrisgroup.com/openurl/44CAM/44CAM_services_page?sid=OVID:medline&id=pmid:35538622&id=doi:10.1177%2F27527530211068718&issn=)
- 13  
14 42. Zarnegar S, Gosiengfiao Y, Rademaker A, Casey R, Albritton KH. Recall of Fertility  
15 Discussion by Adolescent Female Cancer Patients: A Survey-Based Pilot Study. *J*  
16 *Adolesc Young Adult Oncol* [Internet]. 2018 Apr;7(2):249–53. Available from:  
17 <http://www.liebertpub.com/products/product.aspx?pid=387>
- 18  
19 43. Viola A, Taggi-Pinto A, Sahler OJZ, Alderfer MA, Devine KA, Ed M, et al. Problem-  
20 solving skills, parent-adolescent communication, dyadic functioning, and distress  
21 among adolescents with cancer. *Pediatr Blood Cancer*. 2018;65(5).
- 22  
23 44. Weaver MS, Baker JN, Gibson D V, Gattuso JS, Sykes AD, Hinds PS. Adolescents'  
24 preferences for treatment decisional involvement during their cancer. *Cancer*  
25 [Internet]. 2015;121(24):4416–24. Available from:  
26 [http://onlinelibrary.wiley.com/journal/10.1002/\(ISSN\)1097-0142](http://onlinelibrary.wiley.com/journal/10.1002/(ISSN)1097-0142)
- 27  
28 45. Sisk BA, Keenan M, Kaye EC, Baker JN, Mack JW, DuBois JM. Co-management of  
29 communication and care in adolescent and young adult oncology. *Pediatr Blood*  
30 *Cancer* [Internet]. 2022;69(10):e29813. Available from:  
31 [https://ovidsp.ovid.com/athens/ovidweb.cgi?T=JS&CSC=Y&NEWS=N&PAGE=fulltext&](https://ovidsp.ovid.com/athens/ovidweb.cgi?T=JS&CSC=Y&NEWS=N&PAGE=fulltext&D=mexx&AN=35719025)  
32 [https://cambridge-](https://cambridge-primo.hosted.exlibrisgroup.com/openurl/44CAM/44CAM_services_page?sid=OVID:medline&id=pmid:35719025&id=doi:10.1002%2Fpbc.29813&issn=1545-500)  
33 [primo.hosted.exlibrisgroup.com/openurl/44CAM/44CAM\\_services\\_page?sid=OVID:m](https://cambridge-primo.hosted.exlibrisgroup.com/openurl/44CAM/44CAM_services_page?sid=OVID:medline&id=pmid:35719025&id=doi:10.1002%2Fpbc.29813&issn=1545-500)  
34 [edline&id=pmid:35719025&id=doi:10.1002%2Fpbc.29813&issn=1545-500](https://cambridge-primo.hosted.exlibrisgroup.com/openurl/44CAM/44CAM_services_page?sid=OVID:medline&id=pmid:35719025&id=doi:10.1002%2Fpbc.29813&issn=1545-500)
- 35  
36 46. Sisk BA, Keenan M, Schulz GL, Kaye E, Baker JN, Mack JW, et al. Interdependent  
37 functions of communication with adolescents and young adults in oncology. *Pediatr*  
38 *Blood Cancer* [Internet]. 2022; Available from:  
39 [http://onlinelibrary.wiley.com/journal/10.1002/\(ISSN\)1545-5017](http://onlinelibrary.wiley.com/journal/10.1002/(ISSN)1545-5017)
- 40  
41 47. Barlevy D, Wangmo T, Ash S, Elger BS, Ravitsky V. Oncofertility decision making:  
42 Findings from Israeli adolescents and parents. *J Adolesc Young Adult Oncol* [Internet].  
43 2019;8(1):74–83. Available from: [https://www.proquest.com/scholarly-](https://www.proquest.com/scholarly-journals/oncofertility-decision-making-findings-israeli/docview/2426222863/se-2?accountid=47868)  
44 [journals/oncofertility-decision-making-findings-israeli/docview/2426222863/se-](https://www.proquest.com/scholarly-journals/oncofertility-decision-making-findings-israeli/docview/2426222863/se-2?accountid=47868)  
45 [2?accountid=47868](https://www.proquest.com/scholarly-journals/oncofertility-decision-making-findings-israeli/docview/2426222863/se-2?accountid=47868)
- 46  
47 48. Sawyer SM, McNeil R, Thompson K, Orme LM, McCarthy MAOSSM; O [http://orcid.](http://orcid.org/0000-0002-9095-358X)  
48 [org/0000 0002 9095 358X](http://orcid.org/0000-0002-9095-358X), Sawyer SM, et al. Developmentally appropriate care for  
49 adolescents and young adults with cancer: how well is Australia doing? *Supportive*  
50 *Care in Cancer* [Internet]. 2019;27(5):1783–92. Available from:  
51 <http://link.springer.de/link/service/journals/00520/index.htm>
- 52  
53 49. Ellis SJ, Wakefield CE, McLoone JK, Robertson EG, Cohn RJ. Fertility concerns among  
54 child and adolescent cancer survivors and their parents: A qualitative analysis. *J*  
55 *Psychosoc Oncol*. 2016;34(5):347–62.
- 56  
57 50. Ananth P, Mun S, Reffat N, Li R, Sedghi T, Avery M, et al. A Stakeholder-Driven  
58 Qualitative Study to Define High Quality End-of-Life Care for Children With Cancer. *J*  
59 *Pain Symptom Manage* [Internet]. 2021;62(3):492–502. Available from:  
60

- 1  
2  
3  
4  
5  
6  
7  
8  
9  
10  
11  
12  
13  
14  
15  
16  
17  
18  
19  
20  
21  
22  
23  
24  
25  
26  
27  
28  
29  
30  
31  
32  
33  
34  
35  
36  
37  
38  
39  
40  
41  
42  
43  
44  
45  
46  
47  
48  
49  
50  
51  
52  
53  
54  
55  
56  
57  
58  
59  
60
- <https://ovidsp.ovid.com/athens/ovidweb.cgi?T=JS&CSC=Y&NEWS=N&PAGE=fulltext&D=med19&AN=33556497> [https://cambridge-primo.hosted.exlibrisgroup.com/openurl/44CAM/44CAM\\_services\\_page?sid=OVID:medline&id=pmid:33556497&id=doi:10.1016%2Fj.jpainsymman.2021.01](https://cambridge-primo.hosted.exlibrisgroup.com/openurl/44CAM/44CAM_services_page?sid=OVID:medline&id=pmid:33556497&id=doi:10.1016%2Fj.jpainsymman.2021.01).
51. Cicero-Oneto CE, Valdez-Martinez E, Bedolla M. Decision-making on therapeutic futility in Mexican adolescents with cancer: a qualitative study. *BMC Med Ethics* [Internet]. 2017;18:74. Available from: <https://search.ebscohost.com/login.aspx?direct=true&AuthType=athens&db=cin20&AN=127010047&site=ehost-live>
52. Friebert S, Grosseohme DH, Baker JN, Needle J, Thompkins JD, Cheng YI, et al. Congruence Gaps Between Adolescents With Cancer and Their Families Regarding Values, Goals, and Beliefs About End-of-Life Care. *JAMA Netw Open* [Internet]. 2020 May 19;e205424–e205424. Available from: <https://search.ebscohost.com/login.aspx?direct=true&AuthType=athens&db=cin20&AN=143389091&site=ehost-live>
53. Jacobs S, Perez J, Cheng YI, Sill A, Wang J, Lyon ME. Adolescent end of life preferences and congruence with their parents' preferences: Results of a survey of adolescents with cancer. *Pediatr Blood Cancer* [Internet]. 2015;62(4):710–4. Available from: <https://search.ebscohost.com/login.aspx?direct=true&AuthType=athens&db=cin20&AN=109777063&site=ehost-live>
54. Lyon ME, Jacobs S, Briggs L, Cheng YI, Wang J. Family-centered advance care planning for teens with cancer. *JAMA Pediatr*. 2013;167(5):460–7.
55. Wu LM, Chiou SS, Lin PC, Liao YM, Su HL. Decisional conflicts, anxiety, and perceptions of shared decision-making in cancer treatment trajectory among adolescents with cancer: A longitudinal study. *Journal of Nursing Scholarship*. 2022;54(5):589–97.
56. Son H, Miller LE. Family Communication About Cancer in Korea: A Dyadic Analysis of Parent-Adolescent Conversation. *Glob Qual Nurs Res*. 2023 Jan 1;10.
57. Glackin A, Marino JL, Peate M, McNeil R, Orme LM, McCarthy MC, et al. Experiences of Oncofertility Decision-Making and Care in a National Sample of Adolescent and Young Adult Cancer Patients and Parents. *J Adolesc Young Adult Oncol*. 2023;
58. Mack JW, Fasciano KM, Block SD. Adolescent and Young Adult Cancer Patients' Experiences With Treatment Decision-making. *Pediatrics*. 2019;143(5).
59. Martins A, Alvarez-Galvez J, Fern LA, Vindrola-Padros C, Barber JA, Gibson F, et al. The BRIGHTLIGHT National Survey of the Impact of Specialist Teenage and Young Adult Cancer Care on Caregivers' Information and Support Needs. *Cancer Nurs*. 2021;44(3):235–43.
60. Dalton JM. Development and testing of the theory of collaborative decision-making in nursing practice for triads. *J Adv Nurs*. 2003;41(1):22–33.
61. Grinyer A. *Young people living with cancer: implications for policy and practice*. Open University Press; 2007. 182 p.
62. Moules NJ, Laing CM, Estefan A, Schulte F, Guilcher GMT. "Family Is Who They Say They Are"(a): Examining the Effects of Cancer on the Romantic Partners of Adolescents and Young Adults. *J Fam Nurs*. 2018;24(3):374–404.
63. Silva M, Barretta F, Luksch R, Terenziani M, Casanova M, Spreafico F, et al. Adolescents with cancer on privacy: Fact-finding survey on the need for confidentiality and space. *Tumori*. 2021 Oct 1;107(5):452–7.

- 1  
2  
3  
4  
5  
6  
7  
8  
9  
10  
11  
12  
13  
14  
15  
16  
17  
18  
19  
20  
21  
22  
23  
24  
25  
26  
27  
28  
29  
30  
31  
32  
33  
34  
35  
36  
37  
38  
39  
40  
41  
42  
43  
44  
45  
46  
47  
48  
49  
50  
51  
52  
53  
54  
55  
56  
57  
58  
59  
60
64. KM B, Smith A, Schmidt S, TH K, Zebrack B, CF L, et al. Positive and negative psychosocial impact of being diagnosed with cancer as an adolescent or young adult. *Cancer* (0008543X) [Internet]. 2012 Oct 15;118(20):5155–62. Available from: <https://search.ebscohost.com/login.aspx?direct=true&AuthType=athens&db=cin20&AN=104372613&site=ehost-live>
  65. Pyke-Grimm KA, Franck LS, Patterson Kelly K, Halpern-Felsher B, Goldsby RE, Kleiman A, et al. Treatment Decision-Making Involvement in Adolescents and Young Adults With Cancer. *Oncol Nurs Forum* [Internet]. 2019;46(1):E22–37. Available from: <https://search.ebscohost.com/login.aspx?direct=true&AuthType=athens&db=cin20&AN=133553348&site=ehost-live>
  66. Davies J. The experience and role of partners in helping to meet the support needs of adolescents and young adults with cancer. *Journal of Advanced Nursing* (John Wiley & Sons, Inc) [Internet]. 2019 May;75(5):1119–25. Available from: <https://search.ebscohost.com/login.aspx?direct=true&AuthType=athens&db=cin20&AN=135934208&site=ehost-live>
  67. Iannarino NT. “It’s My Job Now, I Guess”: Biographical disruption and communication work in supporters of young adult cancer survivors. *Commun Monogr* [Internet]. 2018;85(4):491–514. Available from: <https://doi.org/10.1080/03637751.2018.1468916>
  68. Coyne I, Amory A, Gibson F, Kiernan G. Information-sharing between healthcare professionals, parents and children with cancer: More than a matter of information exchange. *Eur J Cancer Care* (Engl). 2016;25(1):141–56.
  69. de Vries MC, Wit JM, Engberts DP, Kaspers GJL, van Leeuwen E. Pediatric Oncologists’ Attitudes Towards Involving Adolescents in Decision-Making Concerning Research Participation. *Pediatr Blood Cancer*. 2010;55(1):123–8.
  70. Frederick NN, Bingen K, Bober SL, Cherven B, Xu X, Quinn GP, et al. Pediatric oncology clinician communication about sexual health with adolescents and young adults: A report from the children’s oncology group. *Cancer Med* [Internet]. 2021;10(15):5110–9. Available from: <https://ovidsp.ovid.com/athens/ovidweb.cgi?T=JS&CSC=Y&NEWS=N&PAGE=fulltext&D=med20&AN=34128352> [https://cambridge-primo.hosted.exlibrisgroup.com/openurl/44CAM/44CAM\\_services\\_page?sid=OVID:medline&id=pmid:34128352&id=doi:10.1002%2Fcam4.4077&issn=2045-76](https://cambridge-primo.hosted.exlibrisgroup.com/openurl/44CAM/44CAM_services_page?sid=OVID:medline&id=pmid:34128352&id=doi:10.1002%2Fcam4.4077&issn=2045-76)
  71. General Medical Council. Guidance for All Doctors. 0-18 Years: Guidance for All Doctors [Internet]. 2018;11. Available from: <https://www.gmc-uk.org/ethical-guidance/ethical-guidance-for-doctors/0-18-years/making-decisions#paragraph-29>
  72. British Medical Association. Children and young people toolkit A toolkit for doctors. *BMA.org.uk* [Internet]. 2021; Available from: <https://www.bma.org.uk>
  73. Gillick T. Gillick competence What is Gillick Here ’ s what you need to know about capacity and The Gillick case. 2022;
  74. Joffe S, Fernandez C V., Pentz RD, Ungar DR, Mathew NA, Turner CW, et al. Involving children with cancer in decision-making about research participation. *Journal of Pediatrics*. 2006;149(6).
  75. Mårtenson EK, Fägerskiöld AM. A review of children’s decision-making competence in health care. *J Clin Nurs*. 2008;17(23):3131–41.
  76. Department for Constitutional Affairs. Mental Capacity Act 2005: Code of Practice. *Mental Capacity Act 2005: Code of Practice*. 2007;1–301.



- 1
- 2
- 3
- 4 77. Lea S, Gibson F, Taylor RM. Holistic Competence": How Is it Developed, Shared, and
- 5 Shaped by Health Care Professionals Caring for Adolescents and Young Adults with
- 6 Cancer? *J Adolesc Young Adult Oncol*. 2021;10(5):503–11.
- 7 78. Essig S, Steiner C, Kuehni CE, Weber H, Kiss A. Improving Communication in
- 8 Adolescent Cancer Care: A Multiperspective Study. *Pediatr Blood Cancer*.
- 9 2016;63(8):1423–30.
- 10 79. Essig S, Steiner C, Kühne T, Kremens B, Langewitz W, Kiss A. Communication Skills
- 11 Training for Professionals Working with Adolescent Patients with Cancer Based on
- 12 Participants' Needs: A Pilot. <https://home.liebertpub.com/jayao>. 2019 Jun
- 13 4;8(3):354–62.
- 14 80. Coad J, Smith J, Pontin D, Gibson F. Consult, Negotiate, and Involve: Evaluation of an
- 15 Advanced Communication Skills Program for Health Care Professionals. *Journal of*
- 16 *Pediatric Oncology Nursing*. 2018 Jul 1;35(4):296–307.
- 17 81. Ruhe KM, Badarau DO, Brazzola P, Hengartner H, Elger BS, Wangmo T, et al.
- 18 Participation in pediatric oncology: views of child and adolescent patients.
- 19 *Psychooncology*. 2016;25(9):1036–42.
- 20 82. Blackmore A, Kasfiki EV, Purva M. Simulation-based education to improve
- 21 communication skills: A systematic review and identification of current best practice.
- 22 *BMJ Simul Technol Enhanc Learn*. 2018;4(4):159–64.
- 23 83. Mahoney P, Macfarlane S, Ajjawi R. A qualitative synthesis of video feedback in higher
- 24 education. *Teaching in Higher Education* [Internet]. 2019;24(2):157–79. Available
- 25 from: <https://doi.org/10.1080/13562517.2018.1471457>
- 26 84. Smith S, Mooney S, Cable M, Taylor RM. THE BLUEPRINT OF CARE for teenagers and
- 27 young adults with cancer Second edition. 2016; Available from:
- 28 [https://www.teenagecancertrust.org/sites/default/files/BlueprintOfCare\\_2ndEdition.](https://www.teenagecancertrust.org/sites/default/files/BlueprintOfCare_2ndEdition.pdf)
- 29 pdf
- 30
- 31
- 32
- 33
- 34
- 35
- 36
- 37
- 38
- 39
- 40
- 41
- 42
- 43
- 44
- 45
- 46
- 47
- 48
- 49
- 50
- 51
- 52
- 53
- 54
- 55
- 56
- 57
- 58
- 59
- 60

1 **PROSPERO**  
2 **International prospective register of systematic reviews**

3  
4 **UNIVERSITY of York**  
5 **Centre for Reviews and Dissemination**

6  
7  
8 **Systematic review**  
9

10  
11 A list of fields that can be edited in an update can be found [here](#)

12  
13  
14 **1. \* Review title.**

15  
16 Give the title of the review in English

17 What is the impact and experience on communication for teenagers and young adults with cancer when  
18 supporters are present during healthcare consultations?  
19

20  
21  
22 **2. Original language title.**

23 For reviews in languages other than English, give the title in the original language. This will be displayed with  
24 the English language title.  
25

26  
27  
28 **3. \* Anticipated or actual start date.**

29 Give the date the systematic review started or is expected to start.

30 05/12/2022  
31

32  
33  
34 **4. \* Anticipated completion date.**

35 Give the date by which the review is expected to be completed.

36 07/08/2023  
37

38  
39  
40 **5. \* Stage of review at time of this submission.**

41  
42  
43 **This field uses answers to initial screening questions. It cannot be edited until after registration.**

44  
45  
46 Tick the boxes to show which review tasks have been started and which have been completed.

47  
48  
49 Update this field each time any amendments are made to a published record.  
50

51  
52  
53  
54  
55 The review has not yet started: Yes  
56  
57  
58  
59  
60

## PROSPERO

### International prospective register of systematic reviews

| Review stage                                                    | Started | Completed |
|-----------------------------------------------------------------|---------|-----------|
| Preliminary searches                                            | No      | No        |
| Piloting of the study selection process                         | No      | No        |
| Formal screening of search results against eligibility criteria | No      | No        |
| Data extraction                                                 | No      | No        |
| Risk of bias (quality) assessment                               | No      | No        |
| Data analysis                                                   | No      | No        |

Provide any other relevant information about the stage of the review here.

#### 6. \* Named contact.

The named contact is the guarantor for the accuracy of the information in the register record. This may be any member of the review team.

Deborah Critoph

Email salutation (e.g. "Dr Smith" or "Joanne") for correspondence:

Mrs Critoph

#### 7. \* Named contact email.

Give the electronic email address of the named contact.

dc625@medschl.cam.ac.uk

#### 8. Named contact address

Give the full institutional/organisational postal address for the named contact.

Forvie Site

Addenbrookes Hospital

Department of Public Health and Primary Care

University of Cambridge

Cambridge

CB2 0PY

## PROSPERO

### International prospective register of systematic reviews

#### 9. Named contact phone number.

Give the telephone number for the named contact, including international dialling code.

+44 (0)1223 330300

#### 10. \* Organisational affiliation of the review.

Full title of the organisational affiliations for this review and website address if available. This field may be completed as 'None' if the review is not affiliated to any organisation.

University of Cambridge

#### Organisation web address:

#### 11. \* Review team members and their organisational affiliations.

Give the personal details and the organisational affiliations of each member of the review team. Affiliation refers to groups or organisations to which review team members belong. **NOTE: email and country now MUST be entered for each person, unless you are amending a published record.**

Mrs Deborah Critoph. University of Cambridge  
Dr Luke Smith. Cambridge University NHS Hospital Trust  
Assistant/Associate Professor Rachel Taylor. University College London  
Assistant/Associate Professor Anna Spathis. University of Cambridge  
Assistant/Associate Professor Robbie Duschinsky. University of Cambridge  
Dr Helen Hatcher. Cambridge University NHS Hospital Trust  
Mrs Isla Kuhn. Cambridge University

#### 12. \* Funding sources/sponsors.

Details of the individuals, organizations, groups, companies or other legal entities who have funded or sponsored the review.

Wellcome Trust

#### Grant number(s)

State the funder, grant or award number and the date of award

Wellcome Trust 220197Z/2015  
2019/2026

#### 13. \* Conflicts of interest.

List actual or perceived conflicts of interest (financial or academic).

None

#### 14. Collaborators.

Give the name and affiliation of any individuals or organisations who are working on the review but who are

## PROSPERO

### International prospective register of systematic reviews

not listed as review team members. **NOTE: email and country must be completed for each person, unless you are amending a published record.**

#### 15. \* Review question.

State the review question(s) clearly and precisely. It may be appropriate to break very broad questions down into a series of related more specific questions. Questions may be framed or refined using PI(E)COS or similar where relevant.

**When supporters are present with teenagers and young adults with cancer what is the impact on the communication dynamics and the experiences of care for the young person?**

Research Questions:

1. Who is present with teenagers and young adults with cancer in healthcare communication? For example, who are the supporters, how often do they attend and in what context?
2. What are the teenagers and young adults experiences of care with the supporter being present?
3. What is the impact of a supporter being present in the communication?

#### 16. \* Searches.

State the sources that will be searched (e.g. Medline). Give the search dates, and any restrictions (e.g. language or publication date). Do NOT enter the full search strategy (it may be provided as a link or attachment below.)

Searches will be conducted in:

- Embase via Ovid
- CINAHL via EBSCO
- PsycINFO via EBSCO
- Web of Science Core Collection.

Searches will be limited by date, English language and human studies.

Participants had malignant disease (or BMT for non-malignant disease)

Diagnosis aged 13-24 at the time of the study (for over 50% participants)

Articles focussing on any area of clinical communication

Supporters - parents, romantic partners, friends, informal carers etc.

## PROSPERO

### International prospective register of systematic reviews

Papers published after 2005.

Exclusion criteria:

Non-English language

Systematic reviews

Conference abstracts

Articles focusing on information needs rather than communication skills.

Unpublished articles

Validation research methodology

Single case studies

Studies using retrospective documentation in clinical notes.

Additional search strategy information can be found in the attached PDF document (link provided below).

#### 17. URL to search strategy.

Upload a file with your search strategy, or an example of a search strategy for a specific database, (including the keywords) in pdf or word format. In doing so you are consenting to the file being made publicly accessible. Or provide a URL or link to the strategy. Do NOT provide links to your search **results**.

[https://www.crd.york.ac.uk/PROSPEROFILES/374528\\_STRATEGY\\_20221205.pdf](https://www.crd.york.ac.uk/PROSPEROFILES/374528_STRATEGY_20221205.pdf)

Alternatively, upload your search strategy to CRD in pdf format. Please note that by doing so you are consenting to the file being made publicly accessible.

Yes I give permission for this file to be made publicly available

#### 18. \* Condition or domain being studied.

Give a short description of the disease, condition or healthcare domain being studied in your systematic review.

The disease is a cancer diagnosis, this includes all oncological and haematological malignant diagnoses.

## PROSPERO

### International prospective register of systematic reviews

This is in the teenage and young adult cancer (TYAC) population, ages 13-24 birthday as per UK age ranges for the TYAC speciality.

#### 19. \* Participants/population.

Specify the participants or populations being studied in the review. The preferred format includes details of both inclusion and exclusion criteria.

**Participants:** malignant disease (or BMT for non-malignant disease)

Diagnosis aged 13-24 at the time of the study (for over 50% participants)

Articles focussing on any area of clinical communication

Supporters - parents, romantic partners, friends, informal carers etc.

Papers published after 2005.

Exclusion criteria:

Non-English language

Systematic reviews

Conference abstracts

Articles focusing on information needs rather than communication skills.

Unpublished articles

Validation research methodology

Single case studies

Studies using retrospective documentation in clinical notes.

#### 20. \* Intervention(s), exposure(s).

Give full and clear descriptions or definitions of the interventions or the exposures to be reviewed. The preferred format includes details of both inclusion and exclusion criteria.

All interventions, any frameworks or assessment tools related to communication would be included in the review.

#### 21. \* Comparator(s)/control.

Where relevant, give details of the alternatives against which the intervention/exposure will be compared

## PROSPERO

### International prospective register of systematic reviews

(e.g. another intervention or a non-exposed control group). The preferred format includes details of both inclusion and exclusion criteria.

Any relevant comparator.

#### 22. \* Types of study to be included.

Give details of the study designs (e.g. RCT) that are eligible for inclusion in the review. The preferred format includes both inclusion and exclusion criteria. If there are no restrictions on the types of study, this should be stated.

We expect data returned will largely be qualitative, however will support the use of quantitative data where available.

The study designs that are not eligible for inclusion in the review include:

Systematic reviews, validation research methodology, single case studies and studies using retrospective documentation in clinical notes.

#### 23. Context.

Give summary details of the setting or other relevant characteristics, which help define the inclusion or exclusion criteria.

Teenagers and young adults with cancer can be treated as in-patients and as outpatients and hospices, all settings will be included in the literature review. The cancer journey is complex including significant time points and transitions; at diagnosis, on treatment, relapse, completed treatment, survivorship and end of life care. All parts of the cancer journey if relevant will be included in the systematic review.

#### 24. \* Main outcome(s).

Give the pre-specified main (most important) outcomes of the review, including details of how the outcome is defined and measured and when these measurement are made, if these are part of the review inclusion criteria.

To gain a greater understanding of who the supporters may be when present with a TYAC. What context are they with the TYAC - when an inpatient, at outpatient appointments and what sort of roles do they play -

to gain a greater understanding of how the interaction between TYAC, supporters and HCP communicating with them. What impact does this then have for the TYAC.

#### Measures of effect

Please specify the effect measure(s) for you main outcome(s) e.g. relative risks, odds ratios, risk difference, and/or 'number needed to treat'.

Not applicable.

#### 25. \* Additional outcome(s).

List the pre-specified additional outcomes of the review, with a similar level of detail to that required for main outcomes. Where there are no additional outcomes please state 'None' or 'Not applicable' as appropriate to the review



## PROSPERO

### International prospective register of systematic reviews

None.

### Measures of effect

Please specify the effect measure(s) for you additional outcome(s) e.g. relative risks, odds ratios, risk difference, and/or 'number needed to treat.

Not applicable.

### 16. ~~16. Data~~ Data extraction (selection and coding).

Describe how studies will be selected for inclusion. State what data will be extracted or obtained. State how this will be done and recorded.

All paper titles and abstracts will be assessed for eligibility by one independent reviewer, DC, and at least 25% of the papers (a random sample) assessed by a second independent reviewer, LS. The systematic literature review software Rayyan will be used to support this. Any papers where inclusion eligibility is unclear will be reviewed by a second independent reviewer with any disagreements on eligibility resolved by achieving consensus; a third independent reviewer will assess the eligibility of papers if needed. Full text review will be completed by the same three blinded reviewers and disagreements resolved by discussion.

Data extraction will be undertaken by one independent reviewer, DC using an Excel spreadsheet and reviewed by all paper authors. The data to be extracted will be:

1. Authors
2. Year of publication
3. Study location
4. Title
5. Study aims
6. Who were the supporters: a.) informal carers/support network b.) parents, romantic partners, friends, siblings.
7. Setting (treatment setting)
8. Point in the cancer journey: a.) pre diagnosis b.) diagnosis (up to 2 months) c.) treatment d.) survivorship (up to 2 years) e.) survivorship (up to 5 years) f.) survivorship (longer than 5 years)
9. Study type: a.) qualitative b.) quantitative c.) multi-method

## PROSPERO

### International prospective register of systematic reviews

10. Participant characteristics: a.) TYAC b.) HCP c.) supporters

11. Ages of patients at diagnosis – extract what information they give

12. Ages of patients at the time of the research – extract what information they give

13. Key findings

#### 27. \* Risk of bias (quality) assessment.

State which characteristics of the studies will be assessed and/or any formal risk of bias/quality assessment tools that will be used.

Quantitative articles will be assessed using the RATS guide [http://www.bmj.com/content/suppl/2012/01/12/bmjopen-2011-000138.DC1/BMJ\\_Open\\_IMG\\_Physician\\_Migration\\_RATS\\_Checklist.pdf](http://www.bmj.com/content/suppl/2012/01/12/bmjopen-2011-000138.DC1/BMJ_Open_IMG_Physician_Migration_RATS_Checklist.pdf).

Studies will be assessed using the Mixed Methods Appraisal Tool (MMAT).

Quality assessment will be completed by three reviewers. Disagreements will be discussed for consensus.

Article quality and risk of bias will be included in the review publication.

#### 28. Strategy for data synthesis.

Describe the methods you plan to use to synthesise data. This **must not be generic text** but should be **specific to your review** and describe how the proposed approach will be applied to your data. If meta-analysis is planned, describe the models to be used, methods to explore statistical heterogeneity, and software package to be used.

We have planned a narrative synthesis. Study findings will be synthesised based on the reoccurring themes identified within included publications. This method will aid our inductive research synthesis and seek to generate new insights and recommendations in this previously unexplored area. Our approach will follow the 4 steps as outlined by Popay data (2006):

- Developing a preliminary synthesis of findings of included studies
- Assessing the robustness of the synthesis
- Developing a theory of how the intervention works, why and for whom

Three researchers, DC, LS and RT, will analyse the extracted data from included papers. Data will be fully extracted into an Excel spreadsheet by DC as detailed in Q26, tabulating the study findings as the first step in the narrative synthesis of qualitative and quantitative data. This will allow us to answer research question one: Who are the supporters and in what context. By extracting data related to patient ages, we will also be

## PROSPERO

### International prospective register of systematic reviews

able to narratively synthesise data for commonalities and differences by age categorised as per lower adolescence, middle adolescence, and upper adolescence. We hypothesise that as the age of the TYAC increases, the person in the role of a supporter may change from a parent to another important person. We will also be able to identify and describe if there is a difference in supporter, and role of supporter, at different time points in the cancer trajectory. We hypothesise that TYAC may need more from a supporter in the earlier stages of the cancer experience.

We are anticipating a reasonable number of publications in this review. It is likely that triadic communication is not the primary focus of most of the research studies, but may form part of the findings presented. We are also anticipating mainly qualitative research to detail experiences of communication, and our aim will be to draw the findings from a wide range of individual studies, with diverse methods, together to answer the research questions. We hypothesise that communication experiences for TYAC when a supporter is present are both helpful and unhelpful.

These steps detailed above will be used iteratively. The three researchers will all seek to undertake these steps and come together at regular intervals to review and debate insights, refine the narrative synthesis and reach conclusions by consensus. Researcher triangulation, of three unique backgrounds – doctor, nurse researcher in TYAC, and PhD student, will reduce researcher bias.

#### 29. \* Analysis of subgroups or subsets.

State any planned investigation of 'subgroups'. Be clear and specific about which type of study or participant will be included in each group or covariate investigated. State the planned analytic approach.

It is likely that the final publications that meet the inclusion criteria will be including patients across a wider age range than this review is specifically looking at (13-24). It will therefore be critical to establish the focus with likely study have this age subgroups of patient:

Lower adolescence - 13-16

Middle adolescence - 16-19

Upper adolescent - 19-24

There may be similarities in themes across the subgroups and differences and this will need to form part of the analysis and be presented clearly.

**PROSPERO**  
**International prospective register of systematic reviews**

A supplementary table will be created to identify which age range each publication focussed on to aid accessibility for the reader.

**30. \* Type and method of review.**

Select the type of review, review method and health area from the lists below.

**Type of review**

Cost effectiveness

No

Diagnostic

No

Epidemiologic

No

Individual patient data (IPD) meta-analysis

No

Intervention

No

Living systematic review

No

Meta-analysis

No

Methodology

No

Narrative synthesis

Yes

Network meta-analysis

No

Pre-clinical

No

Prevention

No

Prognostic

No

Prospective meta-analysis (PMA)

No

Review of reviews

No

**PROSPERO****International prospective register of systematic reviews**1  
2  
3 Service delivery

4 No

5  
6 Synthesis of qualitative studies

7 No

8  
9 Systematic review

10 Yes

11  
12 Other

13 No

14  
15  
16  
17  
18 **Health area of the review**

19 Alcohol/substance misuse/abuse

20 No

21  
22 Blood and immune system

23 No

24  
25 Cancer

26 Yes

27  
28 Cardiovascular

29 No

30  
31 Care of the elderly

32 No

33  
34 Child health

35 Yes

36  
37 Complementary therapies

38 No

39  
40 COVID-19

41 No

42  
43 Crime and justice

44 No

45  
46 Dental

47 No

48  
49 Digestive system

50 No

51  
52 Ear, nose and throat

53 No

54  
55 Education

56 No

57  
58  
59  
60

**PROSPERO****International prospective register of systematic reviews**

1  
2  
3 Endocrine and metabolic disorders

4 No

5  
6 Eye disorders

7 No

8  
9 General interest

10 Yes

11  
12 Genetics

13 No

14  
15 Health inequalities/health equity

16 No

17  
18 Infections and infestations

19 No

20  
21 International development

22 No

23  
24 Mental health and behavioural conditions

25 No

26  
27 Musculoskeletal

28 No

29  
30 Neurological

31 No

32  
33 Nursing

34 No

35  
36 Obstetrics and gynaecology

37 No

38  
39 Oral health

40 No

41  
42 Palliative care

43 No

44  
45 Perioperative care

46 No

47  
48 Physiotherapy

49 No

50  
51 Pregnancy and childbirth

52 No

53  
54 Public health (including social determinants of health)

55 Yes

56  
57  
58  
59  
60 Rehabilitation

## PROSPERO

### International prospective register of systematic reviews

No

Respiratory disorders

No

Service delivery

Yes

Skin disorders

No

Social care

No

Surgery

No

Tropical Medicine

No

Urological

No

Wounds, injuries and accidents

No

Violence and abuse

No

### 31. Language.

Select each language individually to add it to the list below, use the bin icon to remove any added in error.

English

There is not an English language summary

### 32. \* Country.

Select the country in which the review is being carried out. For multi-national collaborations select all the countries involved.

England

### 33. Other registration details.

Name any other organisation where the systematic review title or protocol is registered (e.g. Campbell, or The Joanna Briggs Institute) together with any unique identification number assigned by them. If extracted data will be stored and made available through a repository such as the Systematic Review Data Repository (SRDR), details and a link should be included here. If none, leave blank.

### 34. Reference and/or URL for published protocol.

If the protocol for this review is published provide details (authors, title and journal details, preferably in

## PROSPERO International prospective register of systematic reviews

Vancouver format)

Add web link to the published protocol.

Or, upload your published protocol here in pdf format. Note that the upload will be publicly accessible.

Yes I give permission for this file to be made publicly available

Please note that the information required in the PROSPERO registration form must be completed in full even if access to a protocol is given.

### 35. Dissemination plans.

Do you intend to publish the review on completion?

Yes

Give brief details of plans for communicating review findings.?

This will be published in the peer reviewed journal, European Journal of Cancer Care with open access. The results of the literature review will also be shared at national level via the professional organisation - TYAC. It will be shared at international, national and local conferences and shared via OrcID, Research gate and professional twitter accounts to share this publication and findings widely.

### 36. Keywords.

Give words or phrases that best describe the review. Separate keywords with a semicolon or new line. Keywords help PROSPERO users find your review (keywords do not appear in the public record but are included in searches). Be as specific and precise as possible. Avoid acronyms and abbreviations unless these are in wide use.

Teenagers and young adults with cancer; TYAC; Adolescents; Triadic communication; Communication; Supporters; Third person; Parents; Support network; Health care professionals; Experiences; Impact

### 37. Details of any existing review of the same topic by the same authors.

If you are registering an update of an existing review give details of the earlier versions and include a full bibliographic reference, if available.

The systematic review that underpins this line of enquiry by three of the same authors can be found here:

DOI: 10.1089/jayao.2019.0133

This is not an update of an existing review but adding to the growing knowledge base related to



**PROSPERO****International prospective register of systematic reviews**

communicating with teenagers and young adults with cancer.

**38. \* Current review status.**

Update review status when the review is completed and when it is published. New registrations must be ongoing so this field is not editable for initial submission.

Please provide anticipated publication date

Review\_Ongoing

**39. Any additional information.**

Provide any other information relevant to the registration of this review.

Please note this is a re-submission with revisions made to questions 26 and 28.

**40. Details of final report/publication(s) or preprints if available.**

Leave empty until publication details are available OR you have a link to a preprint (NOTE: this field is not editable for initial submission). List authors, title and journal details preferably in Vancouver format.

Give the link to the published review or preprint.

1  
2  
3  
4  
5  
6  
7  
8  
9  
10  
11  
12  
13  
14  
15  
16  
17  
18  
19  
20  
21  
22  
23  
24  
25  
26  
27  
28  
29  
30  
31  
32  
33  
34  
35  
36  
37  
38  
39  
40  
41  
42  
43  
44  
45  
46  
47  
48  
49  
50  
51  
52  
53  
54  
55  
56

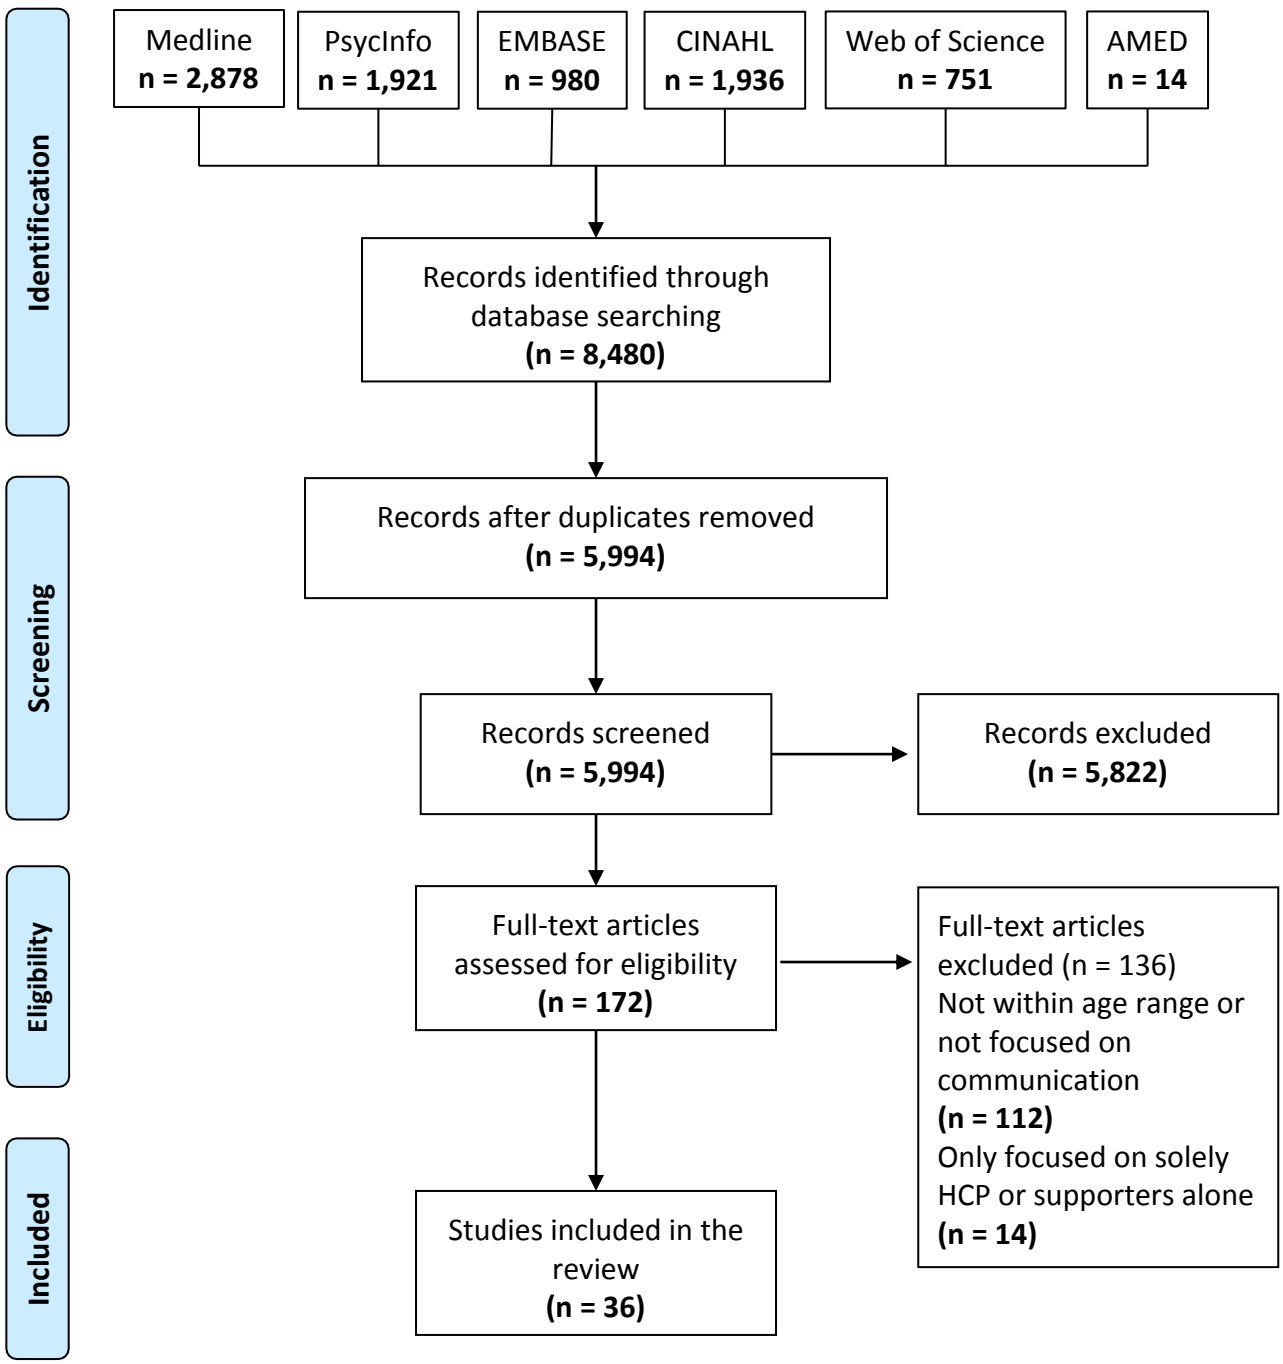

Table 2. Summary of Articles

| <i>First author</i><br>(year) | Title                                                                                                                              | Setting               | Study Type -<br><u>analysis method</u><br><i>Data collection</i>                                                      | Focus                                                                                      | Participant Characteristics                                                                                                                                | Key findings                                                                                                                                                                                                                                                                                                                                                                                                                                                                                                                                                 | WoE Score |
|-------------------------------|------------------------------------------------------------------------------------------------------------------------------------|-----------------------|-----------------------------------------------------------------------------------------------------------------------|--------------------------------------------------------------------------------------------|------------------------------------------------------------------------------------------------------------------------------------------------------------|--------------------------------------------------------------------------------------------------------------------------------------------------------------------------------------------------------------------------------------------------------------------------------------------------------------------------------------------------------------------------------------------------------------------------------------------------------------------------------------------------------------------------------------------------------------|-----------|
| Ananth<br>(2021)              | A Stakeholder-Driven Qualitative Study to Define High Quality End-Of-Life Care for Children with Cancer                            | USA<br>Multicentre    | Qualitative -<br><u>thematic analysis</u><br><br><i>Semi-structured interviews and focus groups.</i>                  | To explore end of life care (EOLC) priorities for children with cancer and their families. | <u>54 participants:</u><br><b>10 AYACs (age range: 17-23 years)</b><br>25 parents (including 12 bereaved parents)<br>19 healthcare professionals           | Important to have direct communication with the child or young person regarding decision-making.<br>Interdisciplinary care with integrated teams is vital for high quality end of life care. Continuity of healthcare professionals was positive.<br>AYACs would prefer to die at home but family and healthcare professionals may be hesitant.                                                                                                                                                                                                              | Medium    |
| Bahrami<br>(2017)             | Information Sharing Challenges Between Adolescents with Cancer, their Parents and Health Care Providers: A Qualitative Study       | Iran<br>Single centre | Qualitative descriptive-exploratory study - <u>grounded theory analysis</u><br><br><i>Semi-structured interviews.</i> | Information sharing between AYACs, parents and health professionals.                       | <u>33 participants:</u><br><b>12 AYACs (age range at interview: 15-20 years, within 1 year of diagnosis)</b><br>6 supporters<br>6 healthcare professionals | AYACs feel they are excluded from information-sharing sessions between parents and healthcare professionals. This leads to disaffiliation, confusion and AYACs seek information from 'inferior' sources.<br>Parents were often the first receivers of information allowing them to act as gatekeepers controlling information to flow to AYACs. Parents may want to shield AYACs from bad news.<br>Trust and honesty are the foundations of effective communication between AYACs and healthcare professionals. AYACs reacted negatively towards dishonesty. | Medium    |
| Barakat<br>(2014)             | A Qualitative Study of Phase III Cancer Clinical Trial Enrollment Decision Making Perspectives from AYAC, Caregivers and Providers | USA<br>Single centre  | Qualitative -<br><u>thematic analysis</u><br><br><i>Semi-structured interviews.</i>                                   | Clinical trial enrollment.                                                                 | <u>40 participants:</u><br><b>13 AYACs (age range: 15-21 years)</b><br>16 supporters<br>11 healthcare professionals                                        | Four patterns of decision-making patterns identified:<br>1. AYAC abdicates to caregiver,<br>2. Caregiver based and AYAC approved,<br>3. Collaborative,<br>4. AYAC in charge of decision-making.<br>Caregivers perceived AYAC to be in charge of decision making most of the time whereas the AYACs felt that "AYAC abdicates to carer" was the most common form of decision making.<br>Distress and poor health limited AYAC involvement in the decision.<br>Developmental and emotional maturity facilitated involvement.                                   | High      |

|    |                     |                                                                                                 |                         |                                                                             |                                                                                                                |                                                                                                                               |                                                                                                                                                                                                                                                                                                                                                                                                                                                                                                                                                                                                                                                                                     |        |
|----|---------------------|-------------------------------------------------------------------------------------------------|-------------------------|-----------------------------------------------------------------------------|----------------------------------------------------------------------------------------------------------------|-------------------------------------------------------------------------------------------------------------------------------|-------------------------------------------------------------------------------------------------------------------------------------------------------------------------------------------------------------------------------------------------------------------------------------------------------------------------------------------------------------------------------------------------------------------------------------------------------------------------------------------------------------------------------------------------------------------------------------------------------------------------------------------------------------------------------------|--------|
| 1  | Barlevy             | Oncofertility decision making: findings from Israeli adolescents and parents                    | Israel<br>Single centre | Qualitative- thematic analysis<br><i>semi-structured interviews</i>         | To understand adolescent oncofertility decision making in Israel, from perspectives of parents and adolescents | <u>35 participants</u><br><b>16 AYACs (age range 12-16 years)</b><br>19 parents                                               | As in other cultural contexts, Israeli adolescents and parents demonstrate multifaceted decision making with respect to oncofertility. A significant finding from this study suggests that health professional shy from discussing posthumous planning of cryopreserved materials with adolescent cancer patients and their parents. 5 out of 16 AYAs felt that the decision was not theirs and that it was instead the parents' or the physicians' to make. Some parents felt that the decision was made by the clinician - explicit or implicit recommendations from the clinician strongly influence decision making. No decisional regret expressed by any members of the dyad. | Medium |
| 16 | Cicero-Oneto (2017) | Decision-making on therapeutic futility in Mexican adolescents with cancer: a qualitative study | Mexico<br>Multicentre   | Qualitative - <u>thematic analysis</u><br><i>Semi-structured interviews</i> | Decision making on therapeutic futility                                                                        | <u>32 Participants</u><br>13 paediatric oncologists<br>13 parents or primary carers<br><b>6 AYACs (age range 13-18 years)</b> | Four themes were identified<br>1. flow of information to inform decision making<br>2. disclosure of prognosis<br>3. decision maker and stakeholder involved in decision making<br>4. barriers and facilitators to decision making<br>Differing values and agendas. The parents valued messages to “life the spirits” whereas the AYACs values honesty from the healthcare professionals Gatekeeping of information.<br>Theme of “deference to authority”                                                                                                                                                                                                                            | Medium |

For peer review only

|                                                                                                                   |                |                                                                                                                        |                            |                                                                                                        |                                                                                           |                                                                                                                                                                                                                                                             |                                                                                                                                                                                                                                                                                                                                                                                                                                                                                                                                                                                                                                                                                                                                                               |        |
|-------------------------------------------------------------------------------------------------------------------|----------------|------------------------------------------------------------------------------------------------------------------------|----------------------------|--------------------------------------------------------------------------------------------------------|-------------------------------------------------------------------------------------------|-------------------------------------------------------------------------------------------------------------------------------------------------------------------------------------------------------------------------------------------------------------|---------------------------------------------------------------------------------------------------------------------------------------------------------------------------------------------------------------------------------------------------------------------------------------------------------------------------------------------------------------------------------------------------------------------------------------------------------------------------------------------------------------------------------------------------------------------------------------------------------------------------------------------------------------------------------------------------------------------------------------------------------------|--------|
| 1<br>2<br>3<br>4<br>5<br>6<br>7<br>8<br>9<br>10<br>11<br>12<br>13<br>14<br>15<br>16<br>17<br>18<br>19<br>20<br>21 | Darabos (2021) | Cancer Related Decision Making Among AYAC, Care Givers and Oncology Providers                                          | USA<br>Single centre       | Qualitative – <u>content analysis with hypothesis coding</u><br><br><i>Semi-structured interviews.</i> | Decision-making and triadic communication                                                 | <u>30 Participants:</u><br><b>11 AYACs (age range: 15-24 years)</b><br>11 supporters<br>8 healthcare professionals                                                                                                                                          | Four decision-making patterns were identified:<br>1. AYAC driven,<br>2. Collaborative,<br>3. Deferral to parents,<br>4. Provider-based, AYA/Caregiver-approved.<br>Collaborative decision-making and AYAC-driven decisions were most commonly described. There was recognition that some decision-making was day/context dependent. AYACs were more likely to drive decisions regarding supportive care than treatment related decisions. AYACs and caregivers explained how cognitive and emotional processes influenced cancer related decisions. Emotional coping was more common than problem-based coping. Direct and honest communication contributes to a stronger relationship. Individuality is key along with flexibility. Time alone is important. | High   |
| 22<br>23<br>24<br>25<br>26<br>27<br>28<br>29<br>30<br>31                                                          | Davies (2019)  | ‘Life then’, ‘life interrupted’, ‘life reclaimed’: the fluctuation of agency in teenagers and young adults with cancer | UK<br>single centre        | qualitative - thematic analysis<br><br><i>case studies - multiple interviews</i>                       | Fluctuation of agency across time and between cases                                       | <u>22 participants</u><br><b>5 AYACs (16-24 years)</b><br><b>5 parents carers</b> (2 fathers, 3 mothers, 1 couple),<br>5 healthcare professionals (4 nurses and 1 oncology consultant)<br>5 other supporters (1 boyfriend, 1 girlfriend, 1 aunt, 2 friends) | Agency fluctuates over time within cases and between cases. Agency can fluctuate between personal, proxy and collective perspectives. Personal agency is high prior to diagnosis, decreases after diagnosis and is reclaimed after treatment.                                                                                                                                                                                                                                                                                                                                                                                                                                                                                                                 | Medium |
| 32<br>33<br>34<br>35<br>36<br>37<br>38<br>39<br>40<br>41<br>42<br>43<br>44<br>45<br>46<br>47                      | Ellis (2016)   | Fertility concerns among child and adolescent survivors and parents: a qualitative study                               | Australia<br>single centre | Qualitative semi-structured telephone interviews                                                       | Fertility related themes with AYACs who are recently off treatment and with their parents | <u>97 participants from 45 families</u><br><b>19 AYACs (age range 7-17 at diagnosis, mean age 13.3)</b><br>44 mothers and 34 fathers                                                                                                                        | Both parents and AYACs are concerned about the potential impacts on fertility of treatment. Poor doctor-patient communication was reported and conversations about fertility were frequently interrupted to discuss illness and treatment. These fertility discussions were not then continues once the AYAC was off treatment                                                                                                                                                                                                                                                                                                                                                                                                                                | Medium |

|    |             |                   |             |                          |                   |                                 |                                                    |        |
|----|-------------|-------------------|-------------|--------------------------|-------------------|---------------------------------|----------------------------------------------------|--------|
| 1  | Essig       | Improving         | Germany,    | Qualitative –            | Explore effective | 54 participants:                | Decision-making can cause conflict when            | Medium |
| 2  | (2016)      | Communication in  | Austria,    | <u>inductive</u>         | communication     | <b>16 AYACs (age range: 13-</b> | adolescents are cognitively mature but legally     |        |
| 3  |             | Adolescent Cancer | Switzerland | <u>thematic analysis</u> | with AYACs for    | <b>19 years)</b>                | lack the ability to make decisions.                |        |
| 4  |             | Care: A           |             |                          | communication     | 8 parents                       | AYACs feel a loss of autonomy.                     |        |
| 5  |             | Multiperspective  | Number of   | <i>Focus groups.</i>     | skills training.  | 30 healthcare professionals     | Age-appropriate environments are important.        |        |
| 6  |             | Study             | centres not |                          |                   |                                 | Effective communication differs depending on the   |        |
| 7  |             |                   | stated      |                          |                   |                                 | type of professional (i.e., doctor vs nurse)       |        |
| 8  |             |                   |             |                          |                   |                                 | Adolescents negatively affect communication        |        |
| 9  |             |                   |             |                          |                   |                                 | when:                                              |        |
| 10 |             |                   |             |                          |                   |                                 | 1. They are indifferent.                           |        |
| 11 |             |                   |             |                          |                   |                                 | 2. Their priorities conflict with treatment        |        |
| 12 |             |                   |             |                          |                   |                                 | 3. They conflict with parents.                     |        |
| 13 |             |                   |             |                          |                   |                                 | Healthcare professionals negatively affect         |        |
| 14 |             |                   |             |                          |                   |                                 | communication when:                                |        |
| 15 |             |                   |             |                          |                   |                                 | 1. They don't treat the adolescent in an age-      |        |
| 16 |             |                   |             |                          |                   |                                 | appropriate way.                                   |        |
| 17 |             |                   |             |                          |                   |                                 | 2. They don't take the adolescent seriously.       |        |
| 18 |             |                   |             |                          |                   |                                 | 3. They give too much information or withhold      |        |
| 19 |             |                   |             |                          |                   |                                 | important information                              |        |
| 20 | Fern (2013) | The Art of Age-   | UK          | Qualitative –            | Review a          | 11 participants:                | Young people must be kept at the centre of         | Medium |
| 21 |             | Appropriate Care  | Number of   | <u>thematic analysis</u> | conceptual model  | <b>11 AYACs (age range: 13-</b> | interactions in recognition of their stated needs: |        |
| 22 |             |                   | centres not |                          | of AYACs'         | <b>25 years)</b>                | 1. Engagement.                                     |        |
| 23 |             |                   | stated      | <i>Peer-to-peer</i>      | cancer care       |                                 | 2. Individually tailored information.              |        |
| 24 |             |                   |             | <i>interviews, field</i> | experiences.      |                                 | 3. Support unproxied by parents/family.            |        |
| 25 |             |                   |             | <i>notes and spider</i>  |                   |                                 | AYACs did not want information to be directed at   |        |
| 26 |             |                   |             | <i>diagrams from</i>     |                   |                                 | parents but at them.                               |        |
| 27 |             |                   |             | <i>focus groups.</i>     |                   |                                 | AYACs found it embarrassing when sensitive         |        |
| 28 |             |                   |             |                          |                   |                                 | information was revealed in the presence of their  |        |
| 29 |             |                   |             |                          |                   |                                 | parents.                                           |        |
| 30 |             |                   |             |                          |                   |                                 | Lack of continuity of healthcare professionals     |        |
| 31 |             |                   |             |                          |                   |                                 | leads to AYACs dissatisfaction and irritation      |        |
| 32 |             |                   |             |                          |                   |                                 | having to repeat their cancer story.               |        |

For peer review only

|                                                                                                             |                  |                                                                                                                               |                       |                                                                        |                                                                                                                          |                                                                                                                                                                                        |                                                                                                                                                                                                                                                                                                                                                                                                                                                                                                                                                                                                                                                                                                                                                                                                                                                                           |        |
|-------------------------------------------------------------------------------------------------------------|------------------|-------------------------------------------------------------------------------------------------------------------------------|-----------------------|------------------------------------------------------------------------|--------------------------------------------------------------------------------------------------------------------------|----------------------------------------------------------------------------------------------------------------------------------------------------------------------------------------|---------------------------------------------------------------------------------------------------------------------------------------------------------------------------------------------------------------------------------------------------------------------------------------------------------------------------------------------------------------------------------------------------------------------------------------------------------------------------------------------------------------------------------------------------------------------------------------------------------------------------------------------------------------------------------------------------------------------------------------------------------------------------------------------------------------------------------------------------------------------------|--------|
| 1<br>2<br>3<br>4<br>5<br>6<br>7<br>8<br>9<br>10<br>11<br>12<br>13<br>14<br>15<br>16<br>17<br>18<br>19<br>20 | Fourneret (2018) | Breaking bad news about cancer to adolescents and young adults: the french experience                                         | France<br>Multicentre | qualitative semi-structured interviews                                 | Explore the effectiveness and implementation of the French announcement protocol in 7 french paediatric oncology centres | <u>90 participants</u><br><b>27 AYACs (21 were 14-17 and 6 were 18-22)</b><br>30 parents (16 mothers, 5 fathers, 9 parents together at the appointment)<br>33 healthcare professionals | Parents and AYACs have different needs - both of which need to be accounted for when breaking bad news. Awkward and premature announcements were noted<br>The announcement consultation – young patients were never alone when informed of their disease; either with parents (n=31) (parents were informed before their child 10 out of 31 times - this was motivated by a compassionate goal of preparing the parents so they can better support the child when the bad news is broken) or close family member/sibling or boyfriend or girlfriend (n=2).<br>Some parents withheld info and some AYACs preferred parents not to know their diagnosis<br>Asymmetry in the triad discussed - but the key quality needed in the triad is mutual trust<br>HCP found parental presence helpful in the study. HCPs should show empathy (no neutrality) and attention to detail | Medium |
| 21<br>22<br>23<br>24<br>25<br>26<br>27<br>28<br>29<br>30<br>31                                              | Frederick (2018) | Adolescent Patient Involvement in Discussions About Relapsed or Refractory Cancer with Oncology Clinicians.                   | USA<br>Single centre  | Qualitative – content analysis<br><br><i>Audiotaped conversations.</i> | Breaking bad news of relapsed or refractory cancer.                                                                      | <u>75 participants:</u><br><b>11 AYACs (age range: 12.6-17.5 years)</b><br>44 supporters<br>20 healthcare professionals                                                                | Adolescent patients' involvement in conversations about relapsed or refractory cancer is limited. Adolescents were accompanied by one (27%) two (64%) or more than two (18%) family members in the discussion.<br>Adolescents spoke 3.5% of words compared to 66.9% clinicians and 30% parents.<br>No conversations included instances in which the clinicians' asked adolescents for their communication preferences or desired role in decision-making.                                                                                                                                                                                                                                                                                                                                                                                                                 | High   |
| 32<br>33<br>34<br>35<br>36<br>37<br>38<br>39<br>40<br>41                                                    | Friebert (2020)  | Congruence gaps between adolescents with cancer and their families regarding values, goals and beliefs about end-of-life care | USA<br>multicentre    | <i>Qualitative cross-sectional study</i>                               | End of life care                                                                                                         | <u>126 participants:</u><br><b>126 parent-AYAC dyads</b><br><b>AYACs (14-20 years, mean age 16.9)</b>                                                                                  | Young people wanted early information (86%) but only 39% families knew this. Families understanding of what was important to their adolescents when dealing with their own dying was excellent for wanting honest answers from their physician and understanding treatment choices but poor for dying a natural death and being off machines that extend life, if dying.<br>Parents do not know what AYACs want at the end of life                                                                                                                                                                                                                                                                                                                                                                                                                                        | Low    |

|                                                                                  |                |                                                                                                                                                                                        |                         |                                                                                  |                                                                                                                                                        |                                                                                                                                                                                                   |                                                                                                                                                                                                                                                                                                                                                                                                                                                                                                                                                                                                              |        |
|----------------------------------------------------------------------------------|----------------|----------------------------------------------------------------------------------------------------------------------------------------------------------------------------------------|-------------------------|----------------------------------------------------------------------------------|--------------------------------------------------------------------------------------------------------------------------------------------------------|---------------------------------------------------------------------------------------------------------------------------------------------------------------------------------------------------|--------------------------------------------------------------------------------------------------------------------------------------------------------------------------------------------------------------------------------------------------------------------------------------------------------------------------------------------------------------------------------------------------------------------------------------------------------------------------------------------------------------------------------------------------------------------------------------------------------------|--------|
| 1<br>2<br>3<br>4<br>5<br>6<br>7<br>8<br>9<br>10<br>11<br>12<br>13<br>14          | Glackin (2023) | Experiences of Oncofertility Decision-Making and Care in a National Sample of Adolescent and Young Adult Cancer Patients and Parents                                                   | Australasia multicentre | Qualitative – cross sectional survey. Reflexive thematic analysis                | Oncofertility decision making                                                                                                                          | <u>210 participants:</u><br><b>99 AYACs (age range 15-25 years)</b><br>111 parents<br>41 AYAC parent dyads from the same family                                                                   | Four themes were identified: emotional care needs; parent-AYA dynamics including autonomy and agency; decision-making considerations including values and practicalities; and reflections on oncofertility and follow-up. Both AYAC and parents placed importance on AYA autonomy in fertility decision-making but, but many AYAs appreciated the role of parents in providing support and guidance throughout the process. Healthcare professionals are encouraged to autonomously engage AYA's around fertility decision making, while concurrently offering opportunities that promotes parental support. | Low    |
| 15<br>16<br>17<br>18<br>19<br>20<br>21<br>22<br>23<br>24<br>25<br>26<br>27<br>28 | Hart (2020)    | The Challenges of Making Informed Decisions About Treatment and Trial Participation Following Cancer: A Qualitative Study with Adolescent and Young Adults with Cancer and Care Givers | UK Multicentre          | Qualitative – <u>thematic analysis</u><br><br><i>Semi-structured interviews.</i> | Shared decision-making – primary treatment and trial participation – at diagnosis.                                                                     | <u>33 participants:</u><br><b>18 AYACs (age range: 16-24 years)</b><br>15 supporters                                                                                                              | AYACs struggled to process information around diagnosis, exacerbated by symptom burden, emotions, and the fast pace of clinical activity. Some AYACs disengaged from conversation topics which were distressing. There are limited options for 'real' decision-making at diagnosis. However, many preferred this when they were already overwhelmed by emotions/symptoms. For trial enrollment, many AYACs allowed themselves to be steered by the recommendation of the healthcare professional who recruited them, thinking they were acting in their best interests.                                      | Medium |
| 29<br>30<br>31<br>32<br>33<br>34<br>35<br>36<br>37<br>38<br>39                   | Hong (2016)    | Care Partnerships: toward technology to support teen's participation in their health care                                                                                              | US multicentre          | Qualitative semi-structured interviews and observations                          | To investigate how technology can support the partnerships between AYACs, parents and clinicians when the AYAC is experiencing complex chronic illness | <u>33 interviews.</u><br><b>15 with AYACs (13 of whom had cancer. age range 13-17)</b><br>15 parents (10 mothers, 1 fathers, 1 aunt and 2 fathers and mothers together)<br>8 clinician caregivers | Participants faced challenges concerning:<br>1) Teens' limited participation in their care<br>2) communicating emotionally sensitive information<br>3) managing physical and emotional responses<br>Time alone with clinicians was important. Mutual protectionism or the need to "emotionally protect each other" was prevalent.                                                                                                                                                                                                                                                                            | Medium |



|    |                    |                                                                                                                                                                            |         |                                                                                            |                                                                                                                                                   |                                                                                                                                       |                                                                                                                                                                                                                                                                                                                                                                                                                                                                                                                                                                                                  |     |
|----|--------------------|----------------------------------------------------------------------------------------------------------------------------------------------------------------------------|---------|--------------------------------------------------------------------------------------------|---------------------------------------------------------------------------------------------------------------------------------------------------|---------------------------------------------------------------------------------------------------------------------------------------|--------------------------------------------------------------------------------------------------------------------------------------------------------------------------------------------------------------------------------------------------------------------------------------------------------------------------------------------------------------------------------------------------------------------------------------------------------------------------------------------------------------------------------------------------------------------------------------------------|-----|
| 1  | Ingersgaard (2018) | A qualitative study on decision-making on Phase III randomized clinical trial participation in paediatric oncology: adolescents' and parents' perspectives and preferences | Denmark | qualitative exploratory study - in-depth semi-structured interviews with thematic analysis | To explore patients' and AYACs' motivs for accepting/ declining participation in the AL2008 trial and adolescents' involvement in decision making | <u>16 participants</u><br><b>5 AYACs (age range 12-16)</b><br>6 parents of AYACs<br>5 parents of children aged 3-10 years with cancer | Key themes<br>1) altruism - wanting to help future AYACs<br>2) trust in the clinicians<br>3) individuals perceptions of cure contra toxicity<br>4) adolescents as active participants in the decision making process<br>5) parental responsibility and authority<br>6) the difficulty of uncertainty                                                                                                                                                                                                                                                                                             | Low |
| 12 | Jacobs (2015)      | Adolescent end of life preferences and congruence with their parents' preferences: results of a survey of adolescents with cancer                                          | Norway  | Qualitative three sessions of dyadic interviews                                            | To explore AYACs' end of life preferences and to assess the congruence of these preferences with the parents' beliefs                             | <u>17 adolescent/ family dyads</u><br><b>17 AYACs (age range 14-21, 71% under 18)</b>                                                 | Adolescents with cancer were comfortable discussing EOL, and the majority preferred to talk about EOL issues before they are facing EOL. There were substantive areas of agreement between adolescents and their surrogates, but important facets of adolescents' EOL wishes were not known by their families, reinforcing the importance of eliciting individual preferences and engaging dyads so parents can understand their children's wishes. 53% of AYACs had never spoken about their end of life preferences but 82% considered it important to let their loved ones know their wishes. | Low |

|    |             |                                                                                                                                                                                                           |                   |                                                                     |                                                                                                                                  |                                                                                                                                                                                     |                                                                                                                                                                                                                                                                                                                                                                                                                                                                                                                                                                                                                                                                                                                                              |        |
|----|-------------|-----------------------------------------------------------------------------------------------------------------------------------------------------------------------------------------------------------|-------------------|---------------------------------------------------------------------|----------------------------------------------------------------------------------------------------------------------------------|-------------------------------------------------------------------------------------------------------------------------------------------------------------------------------------|----------------------------------------------------------------------------------------------------------------------------------------------------------------------------------------------------------------------------------------------------------------------------------------------------------------------------------------------------------------------------------------------------------------------------------------------------------------------------------------------------------------------------------------------------------------------------------------------------------------------------------------------------------------------------------------------------------------------------------------------|--------|
| 1  | Korsvold    | A content analysis of emotional concerns expressed at the time of receiving a cancer diagnosis: An observational study of consultations with adolescent and young adult patients and their family members | Norway            | exploratory mixed methods study<br><br>audio recorded consultations | To investigate the emotional concerns of AYACs at the time of diagnosis and how to quantify how healthcare professionals respond | <u>18 participants</u><br><b>9 AYACs (age range 13-23)</b><br>Present with mother (n=9), father (n=1), sister (n=1) or mother and father (n=2)                                      | Four major themes of emotional concerns expressed by AYA patients and their family members during consultations for a cancer diagnosis:<br>1) side effects/late effects or infertility,<br>2) “what happens in the near future/practical aspects”,<br>3) fear<br>4) sadness<br><br>AYA patients and family members expressed emotional concerns. HCPs typically responded by providing information, rather than affective aspects of the concerns In the sadness theme however, an explicit provide space affective response was the most common response (n=8) followed by an explicit provide space content response (n=7)<br><br>To make patients ‘feel known’ HCP should pay attention to the affective aspect of the expressed concern. | Medium |
| 21 | Lyon (2013) | Family-Centered Advance Care Planning for Teens With Cancer                                                                                                                                               | USA single centre | Qualitative a randomised control pilot study                        | To examine the efficacy of family-centres ACP                                                                                    | <u>30 dyads</u><br><b>mean age of AYACs 16</b><br>17 were randomised to intervention and 13 were randomised to control<br>87% of surrogates were biological parents and were female | The model (ACP) increased congruence in the triad compared to the control standard of care group—so it is key. The family centres ACP AYACs reported feeling more informed that the control group                                                                                                                                                                                                                                                                                                                                                                                                                                                                                                                                            | Low    |

For peer review only

|                                                                                                                   |                  |                                                                                                                                         |                      |                                                                                                                                          |                                 |                                                                            |                                                                                                                                                                                                                                                                                                                                                                                                                                                                                                                                                                                                                                                                                                                                                                                                                                                                                                                                   |        |
|-------------------------------------------------------------------------------------------------------------------|------------------|-----------------------------------------------------------------------------------------------------------------------------------------|----------------------|------------------------------------------------------------------------------------------------------------------------------------------|---------------------------------|----------------------------------------------------------------------------|-----------------------------------------------------------------------------------------------------------------------------------------------------------------------------------------------------------------------------------------------------------------------------------------------------------------------------------------------------------------------------------------------------------------------------------------------------------------------------------------------------------------------------------------------------------------------------------------------------------------------------------------------------------------------------------------------------------------------------------------------------------------------------------------------------------------------------------------------------------------------------------------------------------------------------------|--------|
| 1<br>2<br>3<br>4<br>5<br>6<br>7<br>8<br>9<br>10<br>11<br>12<br>13<br>14<br>15<br>16<br>17<br>18<br>19<br>20<br>21 | Mack<br>(2019)   | Adolescent and<br>Young Adult<br>Cancer Patients'<br>Experiences with<br>Treatment<br>Decision-Making                                   | USA<br>Single Centre | Quantitative –<br><u>multivariate<br/>analysis, logistic<br/>regression</u><br><br><i>Surveys at<br/>diagnosis, 4 and<br/>12 months.</i> | Treatment<br>decision-making    | <u>203 participants:</u><br><b>203 AYACs (age range: 15-<br/>29 years)</b> | A majority of AYACs (58%) want to share decision-making with oncologists. The remainder were split between the AYAC wanting primary responsibility in decision-making (20%) or wanting their oncologist to have primary responsibility (22%).<br>A lower proportion of younger AYACs wanted sole responsibility but this did not achieve statistical significance (P = 0.07).<br>The majority (90%) of AYACs who lived with a parent/guardian wanted some form of input from their parents (either collaborative or considering their opinion).<br>Younger AYACs (15-17 years) were more likely to want greater involvement by their parents but were also more likely to be less involved than they wanted to be relative to their parents.<br>Decisional regret was less likely among AYACs who trusted oncologists completely, and who reported that oncologists understood what was important to them when treatment started. | Medium |
| 22<br>23<br>24<br>25<br>26<br>27<br>28<br>29<br>30<br>31<br>32<br>33                                              | Mobley<br>(2023) | Clinical Trial<br>Participation: A<br>qualitative study of<br>Adolescents and<br>Younger Adults<br>Recently<br>Diagnosed with<br>Cancer | USA                  | <u>Qualitative</u><br>Grounded theory<br>analysis of semi-<br>structured<br>interviews                                                   | Clinical trial<br>participation | <u>9 participants:</u><br><b>9 AYACs (age range 16-20)</b>                 | Consent encompassed the first discussion of CCT. Patients reflected positive and negative effects of timing, decisional role, and emotional impact. Informing participation involved decision-making processes, specific knowledge, understanding and external influence.<br>Participant relationships emphasized the importance of communication and relationships with providers and parents. Patient determinants centered on motives from different perspectives, pre-conceived attitudes, and understanding of CCTs.                                                                                                                                                                                                                                                                                                                                                                                                         | Medium |

|    |          |                  |     |             |                   |                             |                                                  |        |
|----|----------|------------------|-----|-------------|-------------------|-----------------------------|--------------------------------------------------|--------|
| 1  | Olsavsky | Family           | USA | Qualitative | To explore        | 87 participants:            | Five process themes:                             | Medium |
| 2  | (2021)   | communication    |     |             | fertility         | <b>33 AYAC aged 12-25</b>   | (1) Reliance on health care team and social      |        |
| 3  |          | about fertility  |     |             | preservation      | 32 mothers                  | support networks to facilitate FP decisions      |        |
| 4  |          | preservation in  |     |             | communication     | 22 fathers                  | (noted just by parents),                         |        |
| 5  |          | adolescent males |     |             | among mothers,    | Representing 37 families in | (2) withholding parental opinion and deferring   |        |
| 6  |          | newly diagnosed  |     |             | fathers and their | total.                      | the decision to the adolescent,                  |        |
| 7  |          | with cancer      |     |             | male adolescents  |                             | (3) ease of communication,                       |        |
| 8  |          |                  |     |             | newly diagnosed   |                             | (4) communication barriers and facilitators,     |        |
| 9  |          |                  |     |             | with cancer.      |                             | (5) not being present or not remembering details |        |
| 10 |          |                  |     |             |                   |                             | of FP conversations.                             |        |
| 11 |          |                  |     |             |                   |                             | Four content themes:                             |        |
| 12 |          |                  |     |             |                   |                             | (1) preference for biological parenthood (or     |        |
| 13 |          |                  |     |             |                   |                             | grandparenthood),                                |        |
| 14 |          |                  |     |             |                   |                             | (2) consideration of future partner of AYAC's    |        |
| 15 |          |                  |     |             |                   |                             | desire for biological parenthood,                |        |
| 16 |          |                  |     |             |                   |                             | (3) sperm banking whilst it is a viable option,  |        |
| 17 |          |                  |     |             |                   |                             | (4) openness to alternative parenthood options   |        |

For peer review only

---

|    |  |  |  |  |  |  |  |  |
|----|--|--|--|--|--|--|--|--|
| 18 |  |  |  |  |  |  |  |  |
| 19 |  |  |  |  |  |  |  |  |
| 20 |  |  |  |  |  |  |  |  |
| 21 |  |  |  |  |  |  |  |  |
| 22 |  |  |  |  |  |  |  |  |
| 23 |  |  |  |  |  |  |  |  |
| 24 |  |  |  |  |  |  |  |  |
| 25 |  |  |  |  |  |  |  |  |
| 26 |  |  |  |  |  |  |  |  |
| 27 |  |  |  |  |  |  |  |  |
| 28 |  |  |  |  |  |  |  |  |
| 29 |  |  |  |  |  |  |  |  |
| 30 |  |  |  |  |  |  |  |  |
| 31 |  |  |  |  |  |  |  |  |
| 32 |  |  |  |  |  |  |  |  |
| 33 |  |  |  |  |  |  |  |  |
| 34 |  |  |  |  |  |  |  |  |
| 35 |  |  |  |  |  |  |  |  |
| 36 |  |  |  |  |  |  |  |  |
| 37 |  |  |  |  |  |  |  |  |
| 38 |  |  |  |  |  |  |  |  |
| 39 |  |  |  |  |  |  |  |  |
| 40 |  |  |  |  |  |  |  |  |
| 41 |  |  |  |  |  |  |  |  |
| 42 |  |  |  |  |  |  |  |  |
| 43 |  |  |  |  |  |  |  |  |
| 44 |  |  |  |  |  |  |  |  |
| 45 |  |  |  |  |  |  |  |  |
| 46 |  |  |  |  |  |  |  |  |
| 47 |  |  |  |  |  |  |  |  |

|    |           |                    |             |             |                   |                            |                                                     |                              |
|----|-----------|--------------------|-------------|-------------|-------------------|----------------------------|-----------------------------------------------------|------------------------------|
| 1  | Patterson | The Unmet Needs    | Australasia | Qualitative | Aim to contribute | <u>14 Participants:</u>    | A cancer experience poses the potential for         | Low                          |
| 2  | (2012)    | of Emerging Adults |             |             | to the limited    | <b>14 AYAC aged 20-25,</b> | significant impact                                  | on the four requirements for |
| 3  |           | With a Cancer      |             |             | research base and | average age of 22          | achievement of adulthood.                           |                              |
| 4  |           | Diagnosis          |             |             | inform our        |                            |                                                     |                              |
| 5  |           |                    |             |             | understanding of  |                            | The needs of these emerging adults were grouped     |                              |
| 6  |           |                    |             |             | the needs of      |                            | into six themes; information, healthcare provision, |                              |
| 7  |           |                    |             |             | emerging adults   |                            | daily living, interpersonal support, identity       |                              |
| 8  |           |                    |             |             | with a diagnosis  |                            | renegotiation and emotional distress.               |                              |
| 9  |           |                    |             |             | of cancer from a  |                            |                                                     |                              |
| 10 |           |                    |             |             | developmental     |                            | These themes relate directly to the four            |                              |
| 11 |           |                    |             |             | perspective that  |                            | requirements of adulthood.                          |                              |
| 12 |           |                    |             |             | appreciates the   |                            | 1. The task of accepting responsibility for         |                              |
| 13 |           |                    |             |             | key transitional  |                            | oneself emphasises the importance of                |                              |
| 14 |           |                    |             |             | tasks of emerging |                            | empowering AYAC in their                            |                              |
| 15 |           |                    |             |             | adulthood         |                            | communication with HCP.                             |                              |
| 16 |           |                    |             |             | identified by     |                            | 2. The task of deciding on personal beliefs         |                              |
| 17 |           |                    |             |             | Arnett            |                            | and values highlights the importance of             |                              |
| 18 |           |                    |             |             |                   |                            | keeping the AYAC informed and                       |                              |
| 19 |           |                    |             |             |                   |                            | encouraging them in decisions giving                |                              |
| 20 |           |                    |             |             |                   |                            | maximum opportunity to explore beliefs.             |                              |
| 21 |           |                    |             |             |                   |                            | 3. Establishing a relationship with parents as      |                              |
| 22 |           |                    |             |             |                   |                            | equals highlights the importance of                 |                              |
| 23 |           |                    |             |             |                   |                            | maximising AYAC autonomy in relation                |                              |
| 24 |           |                    |             |             |                   |                            | to supporters.                                      |                              |
| 25 |           |                    |             |             |                   |                            | 4. The task of becoming financially                 |                              |
| 26 |           |                    |             |             |                   |                            | independent highlights the importance of            |                              |
| 27 |           |                    |             |             |                   |                            | minimising disruption to daily life.                |                              |

|    |            |                                                                                        |                 |                                                                                          |                                                                                                     |                                                                                          |                                                                                                                                                                                                                                                                                                                                                                                                                                                                                                                                                                                                                                                                                                                                                                                                                                                                                                                                      |        |
|----|------------|----------------------------------------------------------------------------------------|-----------------|------------------------------------------------------------------------------------------|-----------------------------------------------------------------------------------------------------|------------------------------------------------------------------------------------------|--------------------------------------------------------------------------------------------------------------------------------------------------------------------------------------------------------------------------------------------------------------------------------------------------------------------------------------------------------------------------------------------------------------------------------------------------------------------------------------------------------------------------------------------------------------------------------------------------------------------------------------------------------------------------------------------------------------------------------------------------------------------------------------------------------------------------------------------------------------------------------------------------------------------------------------|--------|
| 1  | Pennant    | The Role of Social Support in Adolescent/Young Adults Coping with Cancer Treatment     | USA             | Qualitative                                                                              | To explore specific actions that help AYAC and what behaviours they want from their social supports | <u>20 Participants:</u><br><b>10 AYAC ages 15-26</b> , mean age 18.9 years<br>10 parents | Themes of support included; presence, distraction, positive attitude, maintaining AYAC autonomy, communication and advocacy.<br>Mothers were the most noted family support. AYAC patients can differ in their preferences throughout treatment and this can, at times, appear contradictory.<br>AYACs appear to want autonomy and independence, but appreciate help with daily tasks from their parents.<br>They express the desire for privacy, but also value physical presence and communication<br>Parents must oscillate between being involved in and catering to their AYAC child's needs during treatment while allowing space for independence and autonomy.<br>The findings underscore the importance of maintaining open communication with AYAC patients about their preferences and needs throughout the course of treatment and asking them about both individual and social preferences, which may change frequently. | Medium |
| 24 | Pyke-Grimm | 3 Dimensions of Treatment Decision Making in Adolescents and Young Adults with Cancer. | USA Multicentre | Qualitative – <u>ethnographic</u><br><br><i>Semi-structured interviews, field notes.</i> | Explore the preferences of AYACs for involvement in healthcare decisions                            | <u>16 participants:</u><br><b>16 AYACs (age range: 14.7-20 years)</b>                    | Emotions around diagnosis inhibit information receptiveness and ability to engage in treatment decisions (especially important decisions).<br>Initially AYACs struggle with the jargon and plethora of medical terms which are being used. They have limited knowledge which limits their questions, this increases over time.<br>The importance of decisions differs from one AYACs to the next. Also, some decisions are seen as having only one 'real' option.<br>AYACs engaged in minor decisions much earlier in their treatment, and some began engaging in more important decisions later in treatment.<br>AYACs could adopt an active (sole decision maker), collaborative (with healthcare professionals/supporters) or passive (healthcare professionals/supporters as decision makers) role.                                                                                                                              | Medium |

For peer review only

|                                                                                              |                   |                                                                                                             |                         |                                                                                                                   |                                                                                                            |                                                                                                                          |                                                                                                                                                                                                                                                                                                                                                                                                                                                                                                                                                                                                                                                                                                                               |        |
|----------------------------------------------------------------------------------------------|-------------------|-------------------------------------------------------------------------------------------------------------|-------------------------|-------------------------------------------------------------------------------------------------------------------|------------------------------------------------------------------------------------------------------------|--------------------------------------------------------------------------------------------------------------------------|-------------------------------------------------------------------------------------------------------------------------------------------------------------------------------------------------------------------------------------------------------------------------------------------------------------------------------------------------------------------------------------------------------------------------------------------------------------------------------------------------------------------------------------------------------------------------------------------------------------------------------------------------------------------------------------------------------------------------------|--------|
| 1<br>2<br>3<br>4<br>5<br>6<br>7<br>8<br>9<br>10<br>11<br>12<br>13<br>14                      | Pyke-Grimm (2022) | Day-to-Day Decision Making by Adolescents and Young Adults with Cancer                                      | USA                     | Qualitative Interpretive focused ethnography within the sociologic tradition, informed by symbolic interactionism | To explore involvement of AYAs with cancer in day-to-day decisions affected by their cancer and treatment. | <u>16 Participants:</u><br><b>16 AYAC aged 15-20 (at time of interview - with an average of one year from diagnosis)</b> | Factors influence the involvement of AYAC in decision making such as the type of decision, the point in the cancer journey. They want to be involved.<br>Four day to day decision making categories were identified: mental mindset, self care practices, self-advocacy and negotiating relationships.<br>Parents were often present and staying strong was a recurring theme across mental mindset and negotiating relationships.<br>HCP are critical to facilitate AYAC participation in day to day decision making by encouraging autonomy and with effective communication.                                                                                                                                               | Medium |
| 15<br>16<br>17<br>18<br>19<br>20<br>21<br>22<br>23<br>24<br>25<br>26<br>27<br>28<br>29<br>30 | Sawyer (2019)     | Developmentally Appropriate Care for Adolescents and Young Adults with Cancer: How Well is Australia Doing? | Australasia Multicentre | Quantitative – <u>Chi-squared and Fisher’s exact test</u><br><br><i>Single time point survey.</i>                 | Explore quality of AYAC care in Australia.                                                                 | <u>196 participants:</u><br><b>196 AYACs (age range: 15-25 years)</b>                                                    | >90% of AYACs reported positive responses for 11 of the 14 experience of care items which related to the quality of communication and general interactions with the cancer care team.<br>The most highly endorsed of these experiences of care items related to staff being friendly and respectful, communicating in ways that the AYAC understood, being supportive of AYACs asking questions and engaging families in discussion and decisions as the AYAC wished.<br>Older AYAC (20-25 years) report more empowerment to make decisions than younger AYACs and were more likely to report that healthcare professionals included their family in discussions and decision-making the way they wanted them to be included. | Low    |

|   |             |                                                                                                        |                    |                                                                                    |                                                                       |                                                                                          |                                                                                                                                                                                                                                                                                                                                                                                                                                                                                                                                                                                                                                                                                                                                                                                                                                                                                                                                                                                                                                                                                                                                                                                                                                                                                                                                                                                                                                                                                                                                                                                                                                     |      |
|---|-------------|--------------------------------------------------------------------------------------------------------|--------------------|------------------------------------------------------------------------------------|-----------------------------------------------------------------------|------------------------------------------------------------------------------------------|-------------------------------------------------------------------------------------------------------------------------------------------------------------------------------------------------------------------------------------------------------------------------------------------------------------------------------------------------------------------------------------------------------------------------------------------------------------------------------------------------------------------------------------------------------------------------------------------------------------------------------------------------------------------------------------------------------------------------------------------------------------------------------------------------------------------------------------------------------------------------------------------------------------------------------------------------------------------------------------------------------------------------------------------------------------------------------------------------------------------------------------------------------------------------------------------------------------------------------------------------------------------------------------------------------------------------------------------------------------------------------------------------------------------------------------------------------------------------------------------------------------------------------------------------------------------------------------------------------------------------------------|------|
| 1 | Sisk (2022) | Interdependent<br>Functions of<br>Communication<br>with Adolescents<br>and Young Adults<br>in Oncology | USA<br>Multicentre | Qualitative –<br><u>content analysis</u><br><i>Semi-structured<br/>interviews.</i> | Define<br>communication<br>functions from<br>perspective of<br>AYACs. | <u>37 participants:</u><br><b>37 AYACs (age range: 12-<br/>20 years; mean: 16 years)</b> | Building relationships: demonstrating clinical<br>competence, reliability, empathy, and showing<br>care and concern. When clinicians demonstrated<br>these attributes, AYACs described feelings of<br>trust in the clinicians' ability and intent to care<br>for them.<br>Exchanging information: providing accurate and<br>transparent information that was adapted to<br>AYACs' needs. These needs related to the<br>amount, complexity, timing, and pacing of<br>information, and balancing communication<br>between parents and AYACs.<br>AYACs think honesty and transparency is<br>important. However, transparency could be<br>burdensome.<br>Exploring uncertainties and fears of the future mad<br>AYACs feel better prepared and decreasing<br>anxiety. There was variation between AYACs<br>for exploring these unknowns.<br>AYACs varied in their preferences in sharing<br>distressing information and whether healthcare<br>professionals should remain present and or give<br>AYACs their privacy.<br>AYACs often feel that treatment related decisions<br>realistically only have one choice giving a sense<br>of powerlessness. They played a greater role in<br>decisions outside of treatment related areas.<br>While some AYACs preferred very passive or<br>active roles most described an interdependent<br>process of communication involving them, their<br>parents, and their clinicians.<br>Parents often served as a conduit and buffer of<br>communication between the AYAC and<br>healthcare professional. Many described the<br>integral role of parents in communication<br>regardless of their age. | High |
|---|-------------|--------------------------------------------------------------------------------------------------------|--------------------|------------------------------------------------------------------------------------|-----------------------------------------------------------------------|------------------------------------------------------------------------------------------|-------------------------------------------------------------------------------------------------------------------------------------------------------------------------------------------------------------------------------------------------------------------------------------------------------------------------------------------------------------------------------------------------------------------------------------------------------------------------------------------------------------------------------------------------------------------------------------------------------------------------------------------------------------------------------------------------------------------------------------------------------------------------------------------------------------------------------------------------------------------------------------------------------------------------------------------------------------------------------------------------------------------------------------------------------------------------------------------------------------------------------------------------------------------------------------------------------------------------------------------------------------------------------------------------------------------------------------------------------------------------------------------------------------------------------------------------------------------------------------------------------------------------------------------------------------------------------------------------------------------------------------|------|



|    |             |                                                                                                 |       |                                           |                                                                                                                                      |                                                                                   |                                                                                                                                                                                                                                                                                                                                                                                                                                                                                                                                               |        |
|----|-------------|-------------------------------------------------------------------------------------------------|-------|-------------------------------------------|--------------------------------------------------------------------------------------------------------------------------------------|-----------------------------------------------------------------------------------|-----------------------------------------------------------------------------------------------------------------------------------------------------------------------------------------------------------------------------------------------------------------------------------------------------------------------------------------------------------------------------------------------------------------------------------------------------------------------------------------------------------------------------------------------|--------|
| 1  | Sisk (2022) | Co-management of communication and care in adolescent and young adult oncology                  | USA   | Qualitative<br>Semi-structured interviews | Study aimed to learn how AYAs and parents shared and delegated roles in communication and care during and after treatment for cancer | <u>37 Participants:</u><br><b>37 AYAC aged 12-24</b><br><b>Mean age 16 years</b>  | There are 6 roles that AYAC co-manage with parents; managing information, managing social and emotional needs, managing health, advocacy and empowerment, making decisions and managing logistics.<br>Five factors that influence AYAC roles in communication were:<br>AYAC agency<br>Clinical encouragement<br>Emotional and physical well-being<br>Personality, preferences and values<br>Insights and skills<br><br>There are multiple benefits of engagement of the adolescent.                                                           | Medium |
| 16 | Son (2023)  | Family Communication About Cancer in Korea: A Dyadic Analysis of Parent-Adolescent Conversation | Korea | Qualitative descriptive study             | The aim was to understand communication experiences of Korean AYAC and their parents in the context of young adult cancer.           | <u>14 participants:</u><br><b>7 AYAC (ages 14-19 years)</b><br>and 7 parent pairs | The main theme was “experience the same thing but see it differently” along with three subthemes.<br>Different expectations for parent-adolescent communication, different views on communication challenges and limited sharing and progress in the conversation.<br>This study offers insights into different communication expectations and preferences between Korean adolescents and parents, and reasons for communication challenges, while emphasizing the individualized assessment of parent-adolescent communication between them. | Medium |

For peer review only

|                                                                                                       |               |                                                                                                                         |                 |                                         |                                                                                                                                                                                                                                                                                    |                                                                                                                                                                             |                                                                                                                                                                                                                                                                                                                                                                                                                                                                                                                                                                                                                                                                  |        |
|-------------------------------------------------------------------------------------------------------|---------------|-------------------------------------------------------------------------------------------------------------------------|-----------------|-----------------------------------------|------------------------------------------------------------------------------------------------------------------------------------------------------------------------------------------------------------------------------------------------------------------------------------|-----------------------------------------------------------------------------------------------------------------------------------------------------------------------------|------------------------------------------------------------------------------------------------------------------------------------------------------------------------------------------------------------------------------------------------------------------------------------------------------------------------------------------------------------------------------------------------------------------------------------------------------------------------------------------------------------------------------------------------------------------------------------------------------------------------------------------------------------------|--------|
| 1<br>2<br>3<br>4<br>5<br>6<br>7<br>8<br>9<br>10<br>11<br>12<br>13<br>14<br>15<br>16<br>17<br>18<br>19 | Viola (2018)  | Problem-solving skills, parent-adolescent communication, dyadic functioning, and distress among adolescents with cancer | USA             | Mixed methods study                     | The aim was to describe and assess how intrapersonal (i.e., problem-solving ability) and social-ecological factors (i.e., cancer-related communication with parents and parent-adolescent dyadic relationship quality) are associated with adolescent adjustment (i.e., distress). | 78 participants:<br>39 AYAC and 39 parent pairs<br><b>AYAC 14-20 mean age 16.1</b><br>39 Parents - 79.5 % mothers                                                           | Better adolescent problem solving skills and better parent problem solving skills were associated with lower adolescent distress.<br>Parents and adolescents reported similar moderate levels of cancer related communication problems.<br>The most commonly endorsed cancer-related problem was “not talking about what to do if the AYAC got significantly worse”.<br>Parents reported better problem solving ability and better dyadic functioning than their adolescent.                                                                                                                                                                                     | Low    |
| 20<br>21<br>22<br>23<br>24<br>25                                                                      | Weaver (2016) | “Being a Good Patient” During Times of Illness as Defined by Adolescent Patients With Cancer                            | USA             | Qualitative - semantic content analysis |                                                                                                                                                                                                                                                                                    | 40 participants<br><b>AYAC ages 12-19</b><br>Mean age of 15.5 years                                                                                                         | The concepts of adherence and compliance were the primary phrases used to describe the good patient role, but always within the context of a relationship. Of note: A total of 23 adolescents requested to be interviewed alone with the interviewer (57.5%)                                                                                                                                                                                                                                                                                                                                                                                                     | Medium |
| 26<br>27<br>28<br>29<br>30<br>31<br>32<br>33<br>34<br>35<br>36<br>37<br>38<br>39<br>40                | Weaver (2015) | Adolescents’ Preferences for Treatment Decisional Involvement During Their Cancer                                       | USA Multicentre | Qualitative – semantic content analysis | Investigate AYACs’ decision-making preferences and how supports and healthcare professionals can support involvement.                                                                                                                                                              | 40 participants:<br><b>40 AYACs (age range at interview: 12-18.9 years; 0.5-6 months from diagnosis/relapse)</b><br><i>NB: 34 AYACs primary diagnosis, 6 AYACs relapse.</i> | AYACs indicated a spectrum of preferred decisional roles, with the most common being an actively involved role (65%), although a shared decision-making approach was still valued.<br>AYACs recognized that situational and social contexts might shift their preferred level of involvement in medical decisions.<br>Although adolescents wanted to be involved in decisions, they also expressed an appreciation of family insight, parental presence, and clinician guidance.<br>AYACs can retrospectively identify their preferences for inclusion in medical decision-making, and even when preferring involvement, they value the input of trusted others. | Medium |

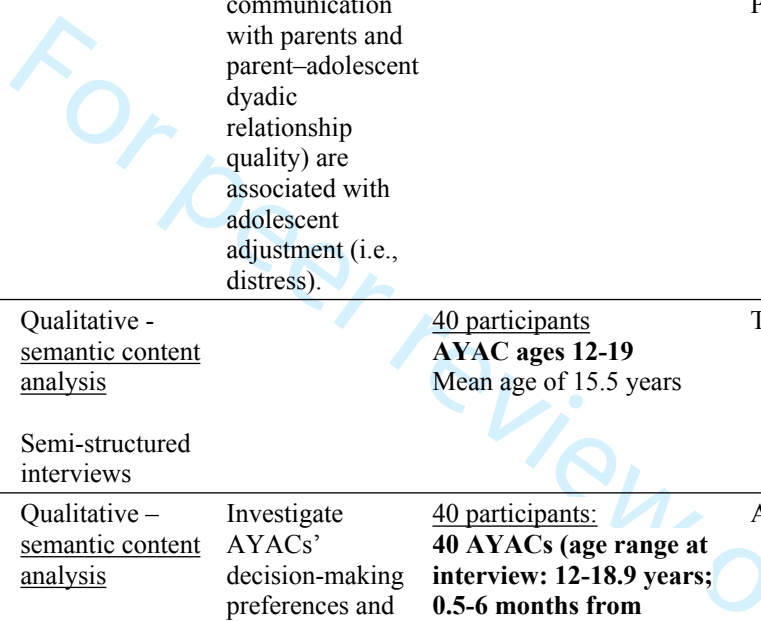

|    |                       |                                                                                                                                                             |        |                                                                                                            |                                                                                                                                                                     |                                                                                                                                                                   |                                                                                                                                                                                                                                                                                                                                                                                                                                                                                              |        |
|----|-----------------------|-------------------------------------------------------------------------------------------------------------------------------------------------------------|--------|------------------------------------------------------------------------------------------------------------|---------------------------------------------------------------------------------------------------------------------------------------------------------------------|-------------------------------------------------------------------------------------------------------------------------------------------------------------------|----------------------------------------------------------------------------------------------------------------------------------------------------------------------------------------------------------------------------------------------------------------------------------------------------------------------------------------------------------------------------------------------------------------------------------------------------------------------------------------------|--------|
| 1  | Wu (2021)             | Decisional conflicts, anxiety, and perceptions of shared decision-making in cancer treatment trajectory among adolescents with cancer: A longitudinal study | Taiwan | Qualitative. An explanatory mixed method was used, incorporating questionnaires and individual interviews. | To describe the perception on levels of decision-making during cancer treatment for adolescents with cancer and examine the trajectory of their decisional conflict | <u>44 participants:</u><br><b>22 AYAC</b> 11 male and 11 female<br>mean age 15.39<br><b>22 Supporters:</b><br>father n=1<br>mothers n=12<br>both n=6<br>other n=3 | Different levels of participation in shared decision making (SDM) during the treatment trajectory were found.<br>Participants experienced the highest decisional conflict during diagnosis.<br>Roles in healthcare communication varied from direct participation to indirect involvement.<br>Overall, participants reported that doctors and parents decided their level of involvement, communication and or decision making.                                                              | Medium |
| 13 | Zarnegar et al (2018) | Recall of Fertility Discussion by Adolescent Female Cancer Patients: A Survey-Based Pilot Study                                                             | USA    | Qualitative                                                                                                | To assess: recall of a fertility discussion, satisfaction with fertility knowledge, and identify factors that may influence recall.                                 | <u>19 participants:</u><br><b>19 AYAC</b> aged 13-18 years and a mean age of 15.6                                                                                 | 42% and 52% of AYAC did not recall discussion regarding treatment related infertility or fertility preservation during initial treatment planning.<br>63% of AYAC reported that parents made all or most of the decisions whereas 30.8% reported making decisions with parents.<br>Key Finding - A greater percentage of AYAC who reported making a joint decision with parents recalled 71% of fertility discussions than those who reported parents made most or all of medical decisions. | Medium |

‡Age range at diagnosis is given except where this was not provided in the article in which alternative metrics are presented and this is highlighted.

AYA(C) = adolescent and young adult (with cancer); NOS = not otherwise specified; RM-ANOVA = repeated measures analysis of variance.

## Update – December 2023

### Medline

Ovid MEDLINE(R) and Epub Ahead of Print, In-Process, In-Data-Review & Other Non-Indexed Citations, Daily and Versions <1946 to December 19, 2023>

1 (Parent\* or guardian\* or mother\* or father\* or partner or wife or wives or husband\* or boyfriend\* or girlfriend\* or sibling\* or friend\* or carer\* or "third person" or caregiver\* or "care-giver\*" or spouse\* or supporter\* or support network\*).ti,ab. or parents/ or fathers/ or mothers/ or spouses/ or caregivers/ or siblings/ or friends/ or legal guardians/ 1148168

2 (TYA cancer or TYA oncology or AYA cancer or AYA oncology or (young adult adj3 (cancer or oncology or leuk?em\* or lymphom\* or h?ematol\*)) or ("teenage and young adult" adj3 cancer) or ("teenage and young adult" adj3 oncology) or (teenage\* adj3 cancer) or (teenage\* adj3 oncology) or (adolescen\* adj3 cancer) or (adolescen\* adj3 oncology) or (young people adj3 cancer) or (young people adj3 oncology) or ("teenage and young adult" adj3 leuk?emia\*) or (teenage\* adj3 leuk?emia\*) or (adolescen\* adj3 leuk?emia\*) or (young people adj3 leuk?emia\*) or (young adult adj3 leuk?emia\*) or ("teenage and young adult" adj3 h?ematol\*) or (teenage\* adj3 h?ematol\*) or (adolescen\* adj3 h?ematol\*) or (young people adj3 h?ematol\*) or (young adult adj3 h?ematol\*) or ("teenage and young adult" adj3 lymphom\*) or (teenage\* adj3 lymphom\*) or (adolescen\* adj3 lymphom\*) or (young people adj3 lymphom\*) or (young adult adj3 lymphom\*)).ti,ab. or ((exp adolescent/ or exp young adult/) and exp neoplasms/) 337284

3 (Communicat\* or Disclos\* or inform\* or Interact\* or relationship\* or Conversation\* or Dialogue\* or triad\* or Interview\* or consult\* or decision making).ti,ab. or exp communication/ or exp disclosure/ or exp information dissemination/ or exp physician-patient relations/ 6147070

4 (affect\* or effect\* or influenc\* or resultant or impact\* or perception\* or perspective\* or encounter\* or preference or opinion or involvement or occurrence\* or feel or "go through" or experienc\*).ti,ab. 13278879

5 1 and 2 and 3 and 4 3519

6 limit 5 to english language 3399

7 (202211\* or 202212\* or 2023\* or 2024\*).dp. or (202211\* or 202212\* or 2023\* or 2024\*).ez. or (202211\* or 202212\* or 2023\* or 2024\*).ed. or (202211\* or 202212\* or 2023\* or 2024\*).ep. 1958643

8 6 and 7 163

### Embase

Embase <1974 to 2023 December 19>

1 (TYA cancer or TYA oncology or AYA cancer or AYA oncology or (young adult adj3  
 2 (cancer or oncology or leuk?em\* or lymphom\* or h?ematol\*)) or ("teenage and young  
 3 adult" adj3 cancer) or ("teenage and young adult" adj3 oncology) or (teenage\* adj3 cancer)  
 4 or (teenage\* adj3 oncology) or (adolescen\* adj3 cancer) or (adolescen\* adj3 oncology) or  
 5 (young people adj3 cancer) or (young people adj3 oncology) or ("teenage and young adult"  
 6 adj3 leuk?emia\*) or (teenage\* adj3 leuk?emia\*) or (adolescen\* adj3 leuk?emia\*) or (young  
 7 people adj3 leuk?emia\*) or (young adult adj3 leuk?emia\*) or ("teenage and young adult"  
 8 adj3 h?ematol\*) or (teenage\* adj3 h?ematol\*) or (adolescen\* adj3 h?ematol\*) or (young  
 9 people adj3 h?ematol\*) or (young adult adj3 h?ematol\*) or ("teenage and young adult" adj3  
 10 lymphom\*) or (teenage\* adj3 lymphom\*) or (adolescen\* adj3 lymphom\*) or (young people  
 11 adj3 lymphom\*) or (young adult adj3 lymphom\*).ti,ab. or ((exp \*adolescent/ or exp \*young  
 12 adult/) and exp \*neoplasm/) 10359

13 2 (Communicat\* or Disclos\* or inform\* or Interact\* or relationship\* or Conversation\*  
 14 or Dialogue\* or triad\* or Interview\* or consult\* or decision making).ti,ab. or exp  
 15 \*interpersonal communication/ or exp \*professional-patient relationship/ or exp  
 16 \*information dissemination/ or exp \*conversation/ 7565603

17 3 (Parent\* or guardian\* or mother\* or father\* or partner or wife or wives or husband\*  
 18 or boyfriend\* or girlfriend\* or sibling\* or friend\* or carer\* or "third person" or caregiver\* or  
 19 "care-giver\*" or spouse\* or supporter\* or support network\*).ti,ab. or \*parent/ or \*father/  
 20 or \*mother/ or \*spouse/ or \*caregiver/ or \*social worker/ or \*sibling/ or \*friend/ or \*legal  
 21 guardian/ 1440315

22 4 (affect\* or effect\* or influenc\* or resultant or impact\* or perception\* or  
 23 perspective\* or encounter\* or preference or opinion or involvement or occurrence\* or feel  
 24 or "go through" or experienc\*).ti,ab. 16593794

25 5 1 and 2 and 3 and 4 1032

26 6 limit 5 to english language 1010

27 7 (202211\* or 202212\* or 2023\* or 2024\*).dc. or (202211\* or 202212\* or 2023\* or  
 28 2024\*).dd. or (202211\* or 202212\* or 2023\* or 2024\*).dp.2647560

29 8 6 and 7 107

30  
31  
32  
33  
34  
35  
36  
37  
38  
39  
40  
41  
42  
43  
44  
45  
46  
47  
48  
49  
50  
51  
52  
53  
54  
55  
56  
57  
58  
59  
60

PsycINFO (via Ebsco)

| #   | Query                   | Limiters/Expanders                                                                                                                       | Last Run Via                                                                                                                | Results |
|-----|-------------------------|------------------------------------------------------------------------------------------------------------------------------------------|-----------------------------------------------------------------------------------------------------------------------------|---------|
| S11 | S1 AND S2 AND S7 AND S8 | Limiters -<br>Publication Date:<br>20221101-<br>20241231<br>Expanders - Apply<br>equivalent subjects<br>Search modes -<br>Boolean/Phrase | Interface -<br>EBSCOhost<br>Research<br>Databases<br>Search<br>Screen -<br>Basic<br>Search<br>Database -<br>APA<br>PsycInfo | 238     |
| S10 | S1 AND S2 AND S7 AND S8 | Expanders - Apply<br>equivalent subjects<br>Narrow by                                                                                    | Interface -<br>EBSCOhost<br>Research                                                                                        | 6,315   |

|    |    |                                                  |                     |             |           |
|----|----|--------------------------------------------------|---------------------|-------------|-----------|
| 1  |    |                                                  |                     |             |           |
| 2  |    |                                                  |                     |             |           |
| 3  |    |                                                  |                     |             |           |
| 4  |    |                                                  | Language: - english | Databases   |           |
| 5  |    |                                                  | Search modes -      | Search      |           |
| 6  |    |                                                  | Boolean/Phrase      | Screen -    |           |
| 7  |    |                                                  |                     | Basic       |           |
| 8  |    |                                                  |                     | Search      |           |
| 9  |    |                                                  |                     | Database -  |           |
| 10 |    |                                                  |                     | APA         |           |
| 11 |    |                                                  |                     | PsycInfo    |           |
| 12 |    |                                                  |                     | Interface - |           |
| 13 |    |                                                  |                     | EBSCOhost   |           |
| 14 |    |                                                  |                     | Research    |           |
| 15 |    |                                                  |                     | Databases   |           |
| 16 |    |                                                  |                     | Search      |           |
| 17 |    |                                                  |                     | Screen -    |           |
| 18 |    |                                                  |                     | Basic       |           |
| 19 |    |                                                  | Expanders - Apply   | Search      |           |
| 20 |    |                                                  | equivalent subjects | Database -  |           |
| 21 |    |                                                  | Search modes -      | APA         |           |
| 22 |    |                                                  | Boolean/Phrase      | PsycInfo    | 6,549     |
| 23 | S9 | S1 AND S2 AND S7 AND S8                          |                     |             |           |
| 24 |    |                                                  |                     | Interface - |           |
| 25 |    |                                                  |                     | EBSCOhost   |           |
| 26 |    |                                                  |                     | Research    |           |
| 27 |    |                                                  |                     | Databases   |           |
| 28 |    |                                                  |                     | Search      |           |
| 29 |    |                                                  |                     | Screen -    |           |
| 30 |    |                                                  |                     | Basic       |           |
| 31 |    | (affect* or effect* or influenc* or resultant or | Expanders - Apply   | Search      |           |
| 32 |    | impact* or perception* or perspective* or        | equivalent subjects | Database -  |           |
| 33 |    | encounter* or preference or opinion or           | Search modes -      | APA         |           |
| 34 |    | involvement or occurrence* or feel or "go        | Boolean/Phrase      | PsycInfo    | 3,524,144 |
| 35 | S8 | through" or experienc*)                          |                     |             |           |
| 36 |    |                                                  |                     | Interface - |           |
| 37 |    |                                                  |                     | EBSCOhost   |           |
| 38 |    |                                                  |                     | Research    |           |
| 39 |    |                                                  |                     | Databases   |           |
| 40 |    |                                                  |                     | Search      |           |
| 41 |    |                                                  |                     | Screen -    |           |
| 42 |    |                                                  |                     | Basic       |           |
| 43 |    |                                                  | Expanders - Apply   | Search      |           |
| 44 |    |                                                  | equivalent subjects | Database -  |           |
| 45 |    |                                                  | Search modes -      | APA         |           |
| 46 |    |                                                  | Boolean/Phrase      | PsycInfo    | 62,557    |
| 47 | S7 | (S5) or (S3 )                                    |                     |             |           |
| 48 |    |                                                  |                     | Interface - |           |
| 49 |    |                                                  |                     | EBSCOhost   |           |
| 50 |    |                                                  |                     | Research    |           |
| 51 |    |                                                  |                     | Databases   |           |
| 52 |    |                                                  |                     | Search      |           |
| 53 |    |                                                  |                     | Screen -    |           |
| 54 |    |                                                  |                     | Basic       |           |
| 55 |    |                                                  | Expanders - Apply   | Search      |           |
| 56 |    |                                                  | equivalent subjects | Database -  |           |
| 57 |    |                                                  | Search modes -      | APA         |           |
| 58 |    |                                                  | Boolean/Phrase      | PsycInfo    | 62,384    |
| 59 | S6 | S4 AND S5                                        |                     |             |           |
| 60 |    |                                                  |                     |             |           |

1  
2  
3  
4  
5  
6  
7  
8  
9  
10  
11  
12  
13  
14  
15  
16  
17  
18  
19  
20  
21  
22  
23  
24  
25  
26  
27  
28  
29  
30  
31  
32  
33  
34  
35  
36  
37  
38  
39  
40  
41  
42  
43  
44  
45  
46  
47  
48  
49  
50  
51  
52  
53  
54  
55  
56  
57  
58  
59  
60

|    |                                                                                                                                                                                                                                                                                                                                                                                                                                                                                                                                                                                                                                                                                                                                                                                                                                                                                                                             |                                                                              |                                                                                                                             |           |
|----|-----------------------------------------------------------------------------------------------------------------------------------------------------------------------------------------------------------------------------------------------------------------------------------------------------------------------------------------------------------------------------------------------------------------------------------------------------------------------------------------------------------------------------------------------------------------------------------------------------------------------------------------------------------------------------------------------------------------------------------------------------------------------------------------------------------------------------------------------------------------------------------------------------------------------------|------------------------------------------------------------------------------|-----------------------------------------------------------------------------------------------------------------------------|-----------|
|    |                                                                                                                                                                                                                                                                                                                                                                                                                                                                                                                                                                                                                                                                                                                                                                                                                                                                                                                             |                                                                              | Interface -<br>EBSCOhost<br>Research<br>Databases<br>Search                                                                 |           |
| S5 | ( (DE "neoplasms" OR DE "Benign Neoplasms" OR DE "Breast Neoplasms" OR DE "Endocrine Neoplasms" OR DE "Leukemias" OR DE "Melanoma" OR DE "Metastasis" OR DE "Nervous System Neoplasms" OR DE "Terminal Cancer"))                                                                                                                                                                                                                                                                                                                                                                                                                                                                                                                                                                                                                                                                                                            | Expanders - Apply<br>equivalent subjects<br>Search modes -<br>Boolean/Phrase | Screen -<br>Basic<br>Search<br>Database -<br>APA<br>PsycInfo                                                                | 62,384    |
| S4 | ( (DE "neoplasms" OR DE "Benign Neoplasms" OR DE "Breast Neoplasms" OR DE "Endocrine Neoplasms" OR DE "Leukemias" OR DE "Melanoma" OR DE "Metastasis" OR DE "Nervous System Neoplasms" OR DE "Terminal Cancer"))                                                                                                                                                                                                                                                                                                                                                                                                                                                                                                                                                                                                                                                                                                            | Expanders - Apply<br>equivalent subjects<br>Search modes -<br>Boolean/Phrase | Interface -<br>EBSCOhost<br>Research<br>Databases<br>Search<br>Screen -<br>Basic<br>Search<br>Database -<br>APA<br>PsycInfo | 62,384    |
| S3 | ("TYA cancer" or "TYA oncology" or "AYA cancer" or "AYA oncology" or ("young adult" n3 (cancer or oncology or leuk?em* or lymphom* or h?ematol*)) or ("teenage and young adult" n3 cancer) or ("teenage and young adult" n3 oncology) or (teenage* n3 cancer) or (teenage* n3 oncology) or (adolescen* n3 cancer) or (adolescen* n3 oncology) or ("young people" n3 cancer) or ("young people" n3 oncology) or ("teenage and young adult" n3 leuk?emia*) or (teenage* n3 leuk?emia*) or (adolescen* n3 leuk?emia*) or ("young people" n3 leuk?emia*) or ("young adult" n3 leuk?emia*) or ("teenage and young adult" n3 h?ematol*) or (teenage* n3 h?ematol*) or (adolescen* n3 h?ematol*) or ("young people" n3 h?ematol*) or ("young adult" n3 h?ematol*) or ("teenage and young adult" n3 lymphom*) or (teenage* n3 lymphom*) or (adolescen* n3 lymphom*) or ("young people" n3 lymphom*) or ("young adult" n3 lymphom*)) | Expanders - Apply<br>equivalent subjects<br>Search modes -<br>Boolean/Phrase | Interface -<br>EBSCOhost<br>Research<br>Databases<br>Search<br>Screen -<br>Basic<br>Search<br>Database -<br>APA<br>PsycInfo | 2,072     |
| S2 | (Communicat* or Disclos* or inform* or Interact* or relationship* or Conversation* or Dialogue* or triad* or Interview* or consult* or "decision making") or DE "communication" OR DE "information dissemination" OR DE "conversation"                                                                                                                                                                                                                                                                                                                                                                                                                                                                                                                                                                                                                                                                                      | Expanders - Apply<br>equivalent subjects<br>Search modes -<br>Boolean/Phrase | Interface -<br>EBSCOhost<br>Research<br>Databases<br>Search<br>Screen -<br>Basic<br>Search<br>Database -<br>APA<br>PsycInfo | 2,545,968 |

|                                                                                                                                                                                                                                                                                                                                                             |                                                                                                                                                                                                                                                                                                                                                                                                                                                                             |                                                                                |                                                                                                                              |
|-------------------------------------------------------------------------------------------------------------------------------------------------------------------------------------------------------------------------------------------------------------------------------------------------------------------------------------------------------------|-----------------------------------------------------------------------------------------------------------------------------------------------------------------------------------------------------------------------------------------------------------------------------------------------------------------------------------------------------------------------------------------------------------------------------------------------------------------------------|--------------------------------------------------------------------------------|------------------------------------------------------------------------------------------------------------------------------|
| 1<br>2<br>3<br>4<br>5<br>6<br>7<br>8<br>9<br>10<br>11<br>12<br>13<br>14<br>15<br>16<br>17<br>18<br>19<br>20<br>21<br>22<br>23<br>24<br>25<br>26<br>27<br>28<br>29<br>30<br>31<br>32<br>33<br>34<br>35<br>36<br>37<br>38<br>39<br>40<br>41<br>42<br>43<br>44<br>45<br>46<br>47<br>48<br>49<br>50<br>51<br>52<br>53<br>54<br>55<br>56<br>57<br>58<br>59<br>60 | <p>(Parent* or guardian* or mother* or father* or partner or wife or wives or husband* or boyfriend* or girlfriend* or sibling* or friend* or teacher* or social worker* or carer* or "third person" or caregiver* or "care-giver*" or spouse* or chaperone*) OR DE "parents" OR DE "mothers" OR DE "fathers" OR DE "spouses" OR DE "wives" OR DE "husbands" OR DE "siblings" OR DE "significant others" OR DE "social workers" OR DE "guardianship" OR DE "caregivers"</p> | <p>Expanders - Apply equivalent subjects<br/>Search modes - Boolean/Phrase</p> | <p>Interface - EBSCOhost<br/>Research Databases<br/>Search Screen - Basic<br/>Search Database - APA<br/>PsycInfo 937,154</p> |
| S1                                                                                                                                                                                                                                                                                                                                                          |                                                                                                                                                                                                                                                                                                                                                                                                                                                                             |                                                                                |                                                                                                                              |

## CINAHL (via Ebsco)

Wednesday, December 20, 2023 4:07:56 PM

| #  | Query                   | Limiters/Expanders                                                                                                       | Last Run Via                                                                                     | Results |
|----|-------------------------|--------------------------------------------------------------------------------------------------------------------------|--------------------------------------------------------------------------------------------------|---------|
| S7 | S1 AND S2 AND S3 AND S4 | Limiters - Publication Date: 20221101-20241231<br>Expanders - Apply equivalent subjects<br>Search modes - Boolean/Phrase | Interface - EBSCOhost<br>Research Databases<br>Search Screen - Advanced Search Database - CINAHL | 99      |
| S6 | S1 AND S2 AND S3 AND S4 | Expanders - Apply equivalent subjects<br>Narrow by Language: - english<br>Search modes - Boolean/Phrase                  | Interface - EBSCOhost<br>Research Databases<br>Search Screen - Advanced Search Database - CINAHL | 2,152   |
| S5 | S1 AND S2 AND S3 AND S4 | Expanders - Apply equivalent subjects<br>Search modes - Boolean/Phrase                                                   | Interface - EBSCOhost<br>Research Databases<br>Search Screen - Advanced Search Database - CINAHL | 2,189   |



|    |                                                                                                                                                                                                                                                                                                                                                                                                                                                                                                                                                                                                                                                                                                                                                                                                                                                                                                                                                                                                 |                                                                        |                                                                                                  |           |
|----|-------------------------------------------------------------------------------------------------------------------------------------------------------------------------------------------------------------------------------------------------------------------------------------------------------------------------------------------------------------------------------------------------------------------------------------------------------------------------------------------------------------------------------------------------------------------------------------------------------------------------------------------------------------------------------------------------------------------------------------------------------------------------------------------------------------------------------------------------------------------------------------------------------------------------------------------------------------------------------------------------|------------------------------------------------------------------------|--------------------------------------------------------------------------------------------------|-----------|
| S4 | (affect* or effect* or influenc* or resultant or impact* or perception* or perspective* or encounter* or preference or opinion or involvement or occurrence* or feel or "go through" or experienc*)                                                                                                                                                                                                                                                                                                                                                                                                                                                                                                                                                                                                                                                                                                                                                                                             | Expanders - Apply equivalent subjects<br>Search modes - Boolean/Phrase | Interface - EBSCOhost<br>Research Databases<br>Search Screen - Advanced Search Database - CINAHL | 3,149,468 |
| S3 | ("TYA cancer" or "TYA oncology" or "AYA cancer" or "AYA oncology" or ("young adult" n3 (cancer or oncology or leuk?em* or lymphom* or h?ematol*)) or ("teenage and young adult" n3 cancer) or ("teenage and young adult" n3 oncology) or (teenage* n3 cancer) or (teenage* n3 oncology) or (adolescen* n3 cancer) or (adolescen* n3 oncology) or ("young people" n3 cancer) or ("young people" n3 oncology) or ("teenage and young adult" n3 leuk?emia*) or (teenage* n3 leuk?emia*) or (adolescen* n3 leuk?emia*) or ("young people" n3 leuk?emia*) or ("young adult" n3 leuk?emia*) or ("teenage and young adult" n3 h?ematol*) or (teenage* n3 h?ematol*) or (adolescen* n3 h?ematol*) or ("young people" n3 h?ematol*) or ("young adult" n3 h?ematol*) or ("teenage and young adult" n3 lymphom*) or (teenage* n3 lymphom*) or (adolescen* n3 lymphom*) or ("young people" n3 lymphom*) or ("young adult" n3 lymphom*)) OR ((MH "adolescence+" OR MH "young adult+") AND (MH "neoplasms+")) | Expanders - Apply equivalent subjects<br>Search modes - Boolean/Phrase | Interface - EBSCOhost<br>Research Databases<br>Search Screen - Advanced Search Database - CINAHL | 61,263    |
| S2 | (Communicat* or Disclos* or inform* or Interact* or relationship* or Conversation* or Dialogue* or triad* or Interview* or consult* or "decision making") or MH "communication+" OR MH "discussion" OR MH "conversation"                                                                                                                                                                                                                                                                                                                                                                                                                                                                                                                                                                                                                                                                                                                                                                        | Expanders - Apply equivalent subjects<br>Search modes - Boolean/Phrase | Interface - EBSCOhost<br>Research Databases<br>Search Screen - Advanced                          | 2,080,061 |

|    |                                                                                                                                                                                                                                                                                                                                                                                                        |                                                                        |                                                                                               |         |
|----|--------------------------------------------------------------------------------------------------------------------------------------------------------------------------------------------------------------------------------------------------------------------------------------------------------------------------------------------------------------------------------------------------------|------------------------------------------------------------------------|-----------------------------------------------------------------------------------------------|---------|
|    | OR (MH "Professional-Patient Relations+")                                                                                                                                                                                                                                                                                                                                                              |                                                                        | Search Database - CINAHL                                                                      |         |
| S1 | (Parent* or guardian* or mother* or father* or partner or wife or wives or husband* or boyfriend* or girlfriend* or sibling* or friend* or teacher* or social worker* or carer* or "third person" or caregiver* or "care-giver*" or spouse* or chaperone*) OR MH "parents" OR MH "mothers" OR MH "fathers" OR MH "spouses" OR MH "siblings" OR MH "teachers" OR MH "social workers" OR MH "caregivers" | Expanders - Apply equivalent subjects<br>Search modes - Boolean/Phrase | Interface - EBSCOhost<br>Research Databases Search Screen - Advanced Search Database - CINAHL | 567,768 |

### Web of Science Core Collection

# Web of Science Search Strategy (v0.1)

# Database: Web of Science Core Collection

# Entitlements:

- WOS.IC: 1993 to 2023
- WOS.CCR: 1985 to 2023
- WOS.SCI: 1900 to 2023
- WOS.AHCI: 1975 to 2023
- WOS.BHCI: 2008 to 2023
- WOS.BSCI: 2008 to 2023
- WOS.ESCI: 2018 to 2023
- WOS.ISTP: 1990 to 2023
- WOS.SSCI: 1956 to 2023
- WOS.ISSHP: 1990 to 2023

# Searches:

1: TS=(Parent\* or guardian\* or mother\* or father\* or partner or wife or wives or husband\* or boyfriend\* or girlfriend\* or sibling\* or friend\* or teacher\* or social worker\* or carer\* or "third person" or caregiver\* or "care-giver\*" or spouse\* or chaperone\*)

Date Run: Wed Dec 20 2023 16:03:59 GMT+0000 (Greenwich Mean Time)

Results: 2283955

2: TS=("TYA cancer" or "TYA oncology" or "AYA cancer" or "AYA oncology" or ("young adult" near/3 (cancer or oncology or leuk?em\* or lymphom\* or h?ematol\*)) or ("teenage and young adult" near/3 cancer) or ("teenage and young adult" near/3 oncology) or (teenage\*

near/3 cancer) or (teenage\* near/3 oncology) or (adolescen\* near/3 cancer) or (adolescen\* near/3 oncology) or ("young people" near/3 cancer) or ("young people" near/3 oncology) or ("teenage and young adult" near/3 leuk?emia\*) or (teenage\* near/3 leuk?emia\*) or (adolescen\* near/3 leuk?emia\*) or ("young people" near/3 leuk?emia\*) or ("young adult" near/3 leuk?emia\*) or ("teenage and young adult" near/3 h?ematol\*) or (teenage\* near/3 h?ematol\*) or (adolescen\* near/3 h?ematol\*) or ("young people" near/3 h?ematol\*) or ("young adult" near/3 h?ematol\*) or ("teenage and young adult" near/3 lymphom\*) or (teenage\* near/3 lymphom\*) or (adolescen\* near/3 lymphom\*) or ("young people" near/3 lymphom\*) or ("young adult" near/3 lymphom\*)  
Date Run: Wed Dec 20 2023 16:04:06 GMT+0000 (Greenwich Mean Time) Results: 8540

3: TS=( Communicat\* or Disclos\* or inform\* or Interact\* or relationship\* or Conversation\* or Dialogue\* or triad\* or Interview\* or consult\* or "decision making")  
Date Run: Wed Dec 20 2023 16:04:13 GMT+0000 (Greenwich Mean Time)  
Results: 12748181

4: TS= (affect\* or effect\* or influenc\* or resultant or impact\* or perception\* or perspective\* or encounter\* or preference or opinion or involvement or occurrence\* or feel or "go through" or experienc\*)  
Date Run: Wed Dec 20 2023 16:04:19 GMT+0000 (Greenwich Mean Time) Results: 26006930

5: #4 AND #3 AND #2 AND #1  
Date Run: Wed Dec 20 2023 16:04:26 GMT+0000 (Greenwich Mean Time) Results: 764

6: #4 AND #3 AND #2 AND #1 and English (Languages)  
Date Run: Wed Dec 20 2023 16:04:35 GMT+0000 (Greenwich Mean Time) Results: 737

7: #4 AND #3 AND #2 AND #1 and English (Languages) and 2022 or 2023 (Publication Years)  
Date Run: Wed Dec 20 2023 16:04:39 GMT+0000 (Greenwich Mean Time) Results: 132

### AMED via Ovid

AMED (Allied and Complementary Medicine) <1985 to October 2023>

1 (Parent\* or guardian\* or mother\* or father\* or partner or wife or wives or husband\* or boyfriend\* or girlfriend\* or sibling\* or friend\* or carer\* or "third person" or caregiver\* or "care-giver\*" or spouse\* or supporter\* or support network\*).ti,ab. 14291

2 (TYA cancer or TYA oncology or AYA cancer or AYA oncology or (young adult adj3 (cancer or oncology or leuk?em\* or lymphom\* or h?ematol\*)) or ("teenage and young adult" adj3 cancer) or ("teenage and young adult" adj3 oncology) or (teenage\* adj3 cancer) or (teenage\* adj3 oncology) or (adolescen\* adj3 cancer) or (adolescen\* adj3 oncology) or (young people adj3 cancer) or (young people adj3 oncology) or ("teenage and young adult" adj3 leuk?emia\*) or (teenage\* adj3 leuk?emia\*) or (adolescen\* adj3 leuk?emia\*) or (young people adj3 leuk?emia\*) or (young adult adj3 leuk?emia\*) or ("teenage and young adult" adj3 h?ematol\*) or (teenage\* adj3 h?ematol\*) or (adolescen\* adj3 h?ematol\*) or (young people adj3 h?ematol\*) or (young adult adj3 h?ematol\*) or ("teenage and young adult" adj3

1  
2  
3 lymphom\*) or (teenage\* adj3 lymphom\*) or (adolescen\* adj3 lymphom\*) or (young people  
4 adj3 lymphom\*) or (young adult adj3 lymphom\*)).ti,ab. 120

5  
6 3 (Communicat\* or Disclos\* or inform\* or Interact\* or relationship\* or Conversation\*  
7 or Dialogue\* or triad\* or Interview\* or consult\* or decision making).ti,ab. 60609

8 4 (affect\* or effect\* or influenc\* or resultant or impact\* or perception\* or  
9 perspective\* or encounter\* or preference or opinion or involvement or occurrence\* or feel  
10 or "go through" or experienc\*).ti,ab. 143225

11  
12 5 1 and 2 and 3 and 4 19

13 6 limit 5 to yr="2005 -Current" 14  
14  
15  
16  
17  
18  
19  
20  
21  
22  
23  
24  
25  
26  
27  
28  
29  
30  
31  
32  
33  
34  
35  
36  
37  
38  
39  
40  
41  
42  
43  
44  
45  
46  
47  
48  
49  
50  
51  
52  
53  
54  
55  
56  
57  
58  
59  
60

For peer review only

## First run – November 2022

### Medline (via Ovid)

Ovid MEDLINE(R) and Epub Ahead of Print, In-Process, In-Data-Review & Other Non-Indexed Citations, Daily and Versions <1946 to November 23, 2022>

- 1 (Parent\* or guardian\* or mother\* or father\* or partner or wife or wives or husband\* or boyfriend\* or girlfriend\* or sibling\* or friend\* or carer\* or "third person" or caregiver\* or "care-giver\*" or spouse\* or supporter\* or support network\*).ti,ab. or parents/ or fathers/ or mothers/ or spouses/ or caregivers/ or siblings/ or friends/ or legal guardians/ 1074121
- 2 (TYA cancer or TYA oncology or AYA cancer or AYA oncology or (young adult adj3 (cancer or oncology or leuk?em\* or lymphom\* or h?ematol\*)) or ("teenage and young adult" adj3 cancer) or ("teenage and young adult" adj3 oncology) or (teenage\* adj3 cancer) or (teenage\* adj3 oncology) or (adolescen\* adj3 cancer) or (adolescen\* adj3 oncology) or (young people adj3 cancer) or (young people adj3 oncology) or ("teenage and young adult" adj3 leuk?emia\*) or (teenage\* adj3 leuk?emia\*) or (adolescen\* adj3 leuk?emia\*) or (young people adj3 leuk?emia\*) or (young adult adj3 leuk?emia\*) or ("teenage and young adult" adj3 h?ematol\*) or (teenage\* adj3 h?ematol\*) or (adolescen\* adj3 h?ematol\*) or (young people adj3 h?ematol\*) or (young adult adj3 h?ematol\*) or ("teenage and young adult" adj3 lymphom\*) or (teenage\* adj3 lymphom\*) or (adolescen\* adj3 lymphom\*) or (young people adj3 lymphom\*) or (young adult adj3 lymphom\*)).ti,ab. or ((exp adolescent/ or exp young adult/) and exp neoplasms/) 333070
- 3 (Communicat\* or Disclos\* or inform\* or Interact\* or relationship\* or Conversation\* or Dialogue\* or triad\* or Interview\* or consult\* or decision making).ti,ab. or exp communication/ or exp disclosure/ or exp information dissemination/ or exp physician-patient relations/ 5715959
- 4 (affect\* or effect\* or influenc\* or resultant or impact\* or perception\* or perspective\* or encounter\* or preference or opinion or involvement or occurrence\* or feel or "go through" or experienc\*).ti,ab. 12406352
- 5 1 and 2 and 3 and 4 3380
- 6 limit 5 to (english language and yr="2005 -Current") 2715

### Embase (via Ovid)

Embase <1974 to 2022 November 23>

1 (TYA cancer or TYA oncology or AYA cancer or AYA oncology or (young adult adj3  
 2 (cancer or oncology or leuk?em\* or lymphom\* or h?ematol\*)) or ("teenage and young  
 3 adult" adj3 cancer) or ("teenage and young adult" adj3 oncology) or (teenage\* adj3 cancer)  
 4 or (teenage\* adj3 oncology) or (adolescen\* adj3 cancer) or (adolescen\* adj3 oncology) or  
 5 (young people adj3 cancer) or (young people adj3 oncology) or ("teenage and young adult"  
 6 adj3 leuk?emia\*) or (teenage\* adj3 leuk?emia\*) or (adolescen\* adj3 leuk?emia\*) or (young  
 7 people adj3 leuk?emia\*) or (young adult adj3 leuk?emia\*) or ("teenage and young adult"  
 8 adj3 h?ematol\*) or (teenage\* adj3 h?ematol\*) or (adolescen\* adj3 h?ematol\*) or (young  
 9 people adj3 h?ematol\*) or (young adult adj3 h?ematol\*) or ("teenage and young adult" adj3  
 10 lymphom\*) or (teenage\* adj3 lymphom\*) or (adolescen\* adj3 lymphom\*) or (young people  
 11 adj3 lymphom\*) or (young adult adj3 lymphom\*)).ti,ab. or ((exp \*adolescent/ or exp \*young  
 12 adult/) and exp \*neoplasm/) 9638

13  
 14  
 15  
 16  
 17  
 18  
 19 2 (Communicat\* or Disclos\* or inform\* or Interact\* or relationship\* or Conversation\*  
 20 or Dialogue\* or triad\* or Interview\* or consult\* or decision making).ti,ab. or exp  
 21 \*interpersonal communication/ or exp \*professional-patient relationship/ or exp  
 22 \*information dissemination/ or exp \*conversation/ 6997005

23  
 24  
 25 3 (Parent\* or guardian\* or mother\* or father\* or partner or wife or wives or husband\*  
 26 or boyfriend\* or girlfriend\* or sibling\* or friend\* or carer\* or "third person" or caregiver\* or  
 27 "care-giver\*" or spouse\* or supporter\* or support network\*).ti,ab. or \*parent/ or \*father/  
 28 or \*mother/ or \*spouse/ or \*caregiver/ or \*social worker/ or \*sibling/ or \*friend/ or \*legal  
 29 guardian/ 1339977

30  
 31  
 32 4 (affect\* or effect\* or influenc\* or resultant or impact\* or perception\* or  
 33 perspective\* or encounter\* or preference or opinion or involvement or occurrence\* or feel  
 34 or "go through" or experienc\*).ti,ab. 15453173

35  
 36  
 37 5 1 and 2 and 3 and 4 939

38  
 39 6 limit 5 to (english language and yr="2005 -Current") 873

## PsycInfo (via Ebscohost)

| #   | Query                   | Limiters/Expanders                                                                                                                                               | Last Run Via                                                                                                 | Results |
|-----|-------------------------|------------------------------------------------------------------------------------------------------------------------------------------------------------------|--------------------------------------------------------------------------------------------------------------|---------|
| S11 | S1 AND S2 AND S7 AND S8 | Limiters -<br>Publication Year:<br>2005-2022<br>Expanders - Apply<br>equivalent subjects<br>Narrow by<br>Language: - english<br>Search modes -<br>Boolean/Phrase | Interface - EBSCOhost<br>Research Databases<br>Search Screen - Basic<br>Search<br>Database - APA<br>PsycInfo | 1,683   |
| S10 | S1 AND S2 AND S7 AND S8 | Expanders - Apply<br>equivalent subjects<br>Narrow by<br>Language: - english                                                                                     | Interface - EBSCOhost<br>Research Databases<br>Search Screen - Basic<br>Search                               | 1,981   |

1  
2  
3  
4  
5  
6  
7  
8  
9  
10  
11  
12  
13  
14  
15  
16  
17  
18  
19  
20  
21  
22  
23  
24  
25  
26  
27  
28  
29  
30  
31  
32  
33  
34  
35  
36  
37  
38  
39  
40  
41  
42  
43  
44  
45  
46  
47  
48  
49  
50  
51  
52  
53  
54  
55  
56  
57  
58  
59  
60

|    |                                                                                                                                                                                                                                                                                                                      |                                                     |                                          |           |
|----|----------------------------------------------------------------------------------------------------------------------------------------------------------------------------------------------------------------------------------------------------------------------------------------------------------------------|-----------------------------------------------------|------------------------------------------|-----------|
|    |                                                                                                                                                                                                                                                                                                                      | Search modes - Boolean/Phrase                       | Database - APA PsycInfo                  |           |
|    |                                                                                                                                                                                                                                                                                                                      |                                                     | Interface - EBSCOhost Research Databases |           |
|    |                                                                                                                                                                                                                                                                                                                      | Expanders - Apply equivalent subjects               | Search Screen - Basic Search             |           |
| S9 | S1 AND S2 AND S7 AND S8                                                                                                                                                                                                                                                                                              | Search modes - Boolean/Phrase                       | Database - APA PsycInfo                  | 2,017     |
|    |                                                                                                                                                                                                                                                                                                                      |                                                     | Interface - EBSCOhost Research Databases |           |
|    |                                                                                                                                                                                                                                                                                                                      | Expanders - Apply equivalent subjects               | Search Screen - Basic Search             |           |
| S8 | (affect* or effect* or influenc* or resultant or impact* or perception* or perspective* or encounter* or preference or opinion or involvement or occurrence* or feel or "go through" or experienc*)                                                                                                                  | Search modes - Boolean/Phrase                       | Database - APA PsycInfo                  | 3,366,619 |
|    |                                                                                                                                                                                                                                                                                                                      |                                                     | Interface - EBSCOhost Research Databases |           |
|    |                                                                                                                                                                                                                                                                                                                      | Expanders - Apply equivalent subjects               | Search Screen - Basic Search             |           |
| S7 | (S5) or (S3 )                                                                                                                                                                                                                                                                                                        | Search modes - Boolean/Phrase                       | Database - APA PsycInfo                  | 13,719    |
|    |                                                                                                                                                                                                                                                                                                                      |                                                     | Interface - EBSCOhost Research Databases |           |
|    |                                                                                                                                                                                                                                                                                                                      | Expanders - Apply equivalent subjects               | Search Screen - Basic Search             |           |
| S6 | S4 AND S5                                                                                                                                                                                                                                                                                                            | Search modes - Boolean/Phrase                       | Database - APA PsycInfo                  | 13,275    |
|    |                                                                                                                                                                                                                                                                                                                      | Expanders - Apply equivalent subjects               |                                          |           |
|    |                                                                                                                                                                                                                                                                                                                      | Narrow by SubjectAge: - adolescence (13-17 yrs)     |                                          |           |
|    |                                                                                                                                                                                                                                                                                                                      | Narrow by SubjectAge: - young adulthood (18-29 yrs) | Interface - EBSCOhost Research Databases |           |
|    |                                                                                                                                                                                                                                                                                                                      | Search modes - Boolean/Phrase                       | Search Screen - Basic Search             |           |
| S5 | (( DE "neoplasms" OR DE "Benign Neoplasms" OR DE "Breast Neoplasms" OR DE "Endocrine Neoplasms" OR DE "Leukemias" OR DE "Melanoma" OR DE "Metastasis" OR DE "Nervous System Neoplasms" OR DE "Terminal Cancer"))                                                                                                     | Search modes - Boolean/Phrase                       | Database - APA PsycInfo                  | 13,275    |
|    |                                                                                                                                                                                                                                                                                                                      |                                                     | Interface - EBSCOhost Research Databases |           |
|    |                                                                                                                                                                                                                                                                                                                      | Expanders - Apply equivalent subjects               | Search Screen - Basic Search             |           |
| S4 | (( DE "neoplasms" OR DE "Benign Neoplasms" OR DE "Breast Neoplasms" OR DE "Endocrine Neoplasms" OR DE "Leukemias" OR DE "Melanoma" OR DE "Metastasis" OR DE "Nervous System Neoplasms" OR DE "Terminal Cancer"))                                                                                                     | Search modes - Boolean/Phrase                       | Database - APA PsycInfo                  | 58,767    |
|    |                                                                                                                                                                                                                                                                                                                      |                                                     | Interface - EBSCOhost Research Databases |           |
|    |                                                                                                                                                                                                                                                                                                                      | Expanders - Apply equivalent subjects               | Search Screen - Basic Search             |           |
| S3 | ("TYA cancer" or "TYA oncology" or "AYA cancer" or "AYA oncology" or ("young adult" n3 (cancer or oncology or leuk?em* or lymphom* or h?ematol*)) or ("teenage and young adult" n3 cancer) or ("teenage and young adult" n3 oncology) or (teenage* n3 cancer) or (teenage* n3 oncology) or (adolescen* n3 cancer) or | Search modes - Boolean/Phrase                       | Database - APA PsycInfo                  | 1,864     |

(adolescen\* n3 oncology) or ("young people" n3 cancer) or ("young people" n3 oncology) or ("teenage and young adult" n3 leuk?emia\*) or (teenage\* n3 leuk?emia\*) or (adolescen\* n3 leuk?emia\*) or ("young people" n3 leuk?emia\*) or ("young adult" n3 leuk?emia\*) or ("teenage and young adult" n3 h?ematol\*) or (teenage\* n3 h?ematol\*) or (adolescen\* n3 h?ematol\*) or ("young people" n3 h?ematol\*) or ("young adult" n3 h?ematol\*) or ("teenage and young adult" n3 lymphom\*) or (teenage\* n3 lymphom\*) or (adolescen\* n3 lymphom\*) or ("young people" n3 lymphom\*) or ("young adult" n3 lymphom\*))

|    |                                                                                                                                                                                                                                                                                                                                                                                                                                                                      |                                                                        |                                                                                                           |           |
|----|----------------------------------------------------------------------------------------------------------------------------------------------------------------------------------------------------------------------------------------------------------------------------------------------------------------------------------------------------------------------------------------------------------------------------------------------------------------------|------------------------------------------------------------------------|-----------------------------------------------------------------------------------------------------------|-----------|
| S2 | (Communicat* or Disclos* or inform* or Interact* or relationship* or Conversation* or Dialogue* or triad* or Interview* or consult* or "decision making") or DE "communication" OR DE "information dissemination" OR DE "conversation"                                                                                                                                                                                                                               | Expanders - Apply equivalent subjects<br>Search modes - Boolean/Phrase | Interface - EBSCOhost<br>Research Databases<br>Search Screen - Basic Search<br>Database - APA<br>PsycInfo | 2,423,980 |
| S1 | (Parent* or guardian* or mother* or father* or partner or wife or wives or husband* or boyfriend* or girlfriend* or sibling* or friend* or teacher* or social worker* or carer* or "third person" or caregiver* or "care-giver*" or spouse* or chaperone*) OR DE "parents" OR DE "mothers" OR DE "fathers" OR DE "spouses" OR DE "wives" OR DE "husbands" OR DE "siblings" OR DE "significant others" OR DE "social workers" OR DE "guardianship" OR DE "caregivers" | Expanders - Apply equivalent subjects<br>Search modes - Boolean/Phrase | Interface - EBSCOhost<br>Research Databases<br>Search Screen - Basic Search<br>Database - APA<br>PsycInfo | 894,375   |

[CINAHL \(via Ebscohost\)](#)

[Accessibility Information and Tips](#)

[Print Search History](#)

Thursday, November 24, 2022 6:21:27 PM

| #  | Query                   | Limiters/Expanders                                                                                                                                      | Last Run Via                                                                                        | Results |
|----|-------------------------|---------------------------------------------------------------------------------------------------------------------------------------------------------|-----------------------------------------------------------------------------------------------------|---------|
| S7 | S1 AND S2 AND S3 AND S4 | Limiters - Published Date: 20050101-20221231<br>Expanders - Apply equivalent subjects<br>Narrow by Language: - english<br>Search modes - Boolean/Phrase | Interface - EBSCOhost<br>Research Databases<br>Search Screen - Advanced Search<br>Database - CINAHL | 1,837   |



|                                                                                                                      |    |                                                                                                                                                                                                                                                                                                                                                                                                                                                                                                                                          |                                                                                                                        |                                                                                                     |           |
|----------------------------------------------------------------------------------------------------------------------|----|------------------------------------------------------------------------------------------------------------------------------------------------------------------------------------------------------------------------------------------------------------------------------------------------------------------------------------------------------------------------------------------------------------------------------------------------------------------------------------------------------------------------------------------|------------------------------------------------------------------------------------------------------------------------|-----------------------------------------------------------------------------------------------------|-----------|
| 1<br>2<br>3<br>4<br>5<br>6<br>7<br>8<br>9<br>10<br>11<br>12<br>13<br>14<br>15                                        | S6 | S1 AND S2 AND S3 AND S4                                                                                                                                                                                                                                                                                                                                                                                                                                                                                                                  | Limiters - Published Date: 20050101-20221231<br>Expanders - Apply equivalent subjects<br>Search modes - Boolean/Phrase | Interface - EBSCOhost<br>Research Databases<br>Search Screen - Advanced Search<br>Database - CINAHL | 1,866     |
| 16<br>17<br>18<br>19<br>20<br>21<br>22<br>23<br>24<br>25<br>26<br>27<br>28                                           | S5 | S1 AND S2 AND S3 AND S4                                                                                                                                                                                                                                                                                                                                                                                                                                                                                                                  | Expanders - Apply equivalent subjects<br>Search modes - Boolean/Phrase                                                 | Interface - EBSCOhost<br>Research Databases<br>Search Screen - Advanced Search<br>Database - CINAHL | 2,106     |
| 29<br>30<br>31<br>32<br>33<br>34<br>35<br>36<br>37<br>38<br>39<br>40                                                 | S4 | (affect* or effect* or influenc* or resultant or impact* or perception* or perspective* or encounter* or preference or opinion or involvement or occurance* or feel or "go through" or experienc*)                                                                                                                                                                                                                                                                                                                                       | Expanders - Apply equivalent subjects<br>Search modes - Boolean/Phrase                                                 | Interface - EBSCOhost<br>Research Databases<br>Search Screen - Advanced Search<br>Database - CINAHL | 3,016,184 |
| 41<br>42<br>43<br>44<br>45<br>46<br>47<br>48<br>49<br>50<br>51<br>52<br>53<br>54<br>55<br>56<br>57<br>58<br>59<br>60 | S3 | ("TYA cancer" or "TYA oncology" or "AYA cancer" or "AYA oncology" or ("young adult" n3 (cancer or oncology or leuk?em* or lymphom* or h?ematol*)) or ("teenage and young adult" n3 cancer) or ("teenage and young adult" n3 oncology) or (teenage* n3 cancer) or (teenage* n3 oncology) or (adolescen* n3 cancer) or (adolescen* n3 oncology) or ("young people" n3 cancer) or ("young people" n3 oncology) or ("teenage and young adult" n3 leuk?emia*) or (teenage* n3 leuk?emia*) or (adolescen* n3 leuk?emia*) or ("young people" n3 | Expanders - Apply equivalent subjects<br>Search modes - Boolean/Phrase                                                 | Interface - EBSCOhost<br>Research Databases<br>Search Screen - Advanced Search<br>Database - CINAHL | 59,927    |

|    |                                                                                                                                                                                                                                                                                                                                                                                                                                                       |                                                                        |                                                                                                  |           |
|----|-------------------------------------------------------------------------------------------------------------------------------------------------------------------------------------------------------------------------------------------------------------------------------------------------------------------------------------------------------------------------------------------------------------------------------------------------------|------------------------------------------------------------------------|--------------------------------------------------------------------------------------------------|-----------|
|    | leuk?emia*) or ("young adult" n3 leuk?emia*) or ("teenage and young adult" n3 h?ematol*) or (teenage* n3 h?ematol*) or (adolescen* n3 h?ematol*) or ("young people" n3 h?ematol*) or ("young adult" n3 h?ematol*) or ("teenage and young adult" n3 lymphom*) or (teenage* n3 lymphom*) or (adolescen* n3 lymphom*) or ("young people" n3 lymphom*) or ("young adult" n3 lymphom*) OR ((MH "adolescence+" OR MH "young adult+") AND (MH "neoplasms+")) |                                                                        |                                                                                                  |           |
| S2 | (Communicat* or Disclos* or inform* or Interact* or relationship* or Conversation* or Dialogue* or triad* or Interview* or consult* or "decision making") or MH "communication+" OR MH "discussion" OR MH "conversation" OR (MH "Professional-Patient Relations+")                                                                                                                                                                                    | Expanders - Apply equivalent subjects<br>Search modes - Boolean/Phrase | Interface - EBSCOhost<br>Research Databases<br>Search Screen - Advanced Search Database - CINAHL | 2,016,086 |
| S1 | (Parent* or guardian* or mother* or father* or partner or wife or wives or husband* or boyfriend* or girlfriend* or sibling* or friend* or teacher* or social worker* or carer* or "third person" or caregiver* or "care-giver*" or spouse* or chaperone*) OR MH "parents" OR MH "mothers" OR MH "fathers" OR MH "spouses" OR MH "siblings" OR MH "teachers" OR MH "social workers" OR MH "caregivers"                                                | Expanders - Apply equivalent subjects<br>Search modes - Boolean/Phrase | Interface - EBSCOhost<br>Research Databases<br>Search Screen - Advanced Search Database - CINAHL | 544,991   |

## Web of Science Core Collection

# Web of Science Search Strategy (v0.1)

# Database: Web of Science Core Collection

# Entitlements:

- WOS.IC: 1993 to 2022

- WOS.CCR: 1985 to 2022

- 1  
2  
3 - WOS.SCI: 1900 to 2022  
4 - WOS.AHCI: 1975 to 2022  
5 - WOS.BHCI: 2008 to 2022  
6 - WOS.BSCI: 2008 to 2022  
7 - WOS.ESCI: 2017 to 2022  
8 - WOS.ISTP: 1990 to 2022  
9 - WOS.SSCI: 1956 to 2022  
10 - WOS.ISSHP: 1990 to 2022  
11  
12  
13  
14

15 # Searches:

16  
17  
18 1: TS=(Parent\* or guardian\* or mother\* or father\* or partner or wife or wives or husband\*  
19 or boyfriend\* or girlfriend\* or sibling\* or friend\* or teacher\* or social worker\* or carer\* or  
20 "third person" or caregiver\* or "care-giver\*" or spouse\* or chaperone\*)

21 Results: 2129759  
22  
23

24 2: TS=("TYA cancer" or "TYA oncology" or "AYA cancer" or "AYA oncology" or ("young adult"  
25 near/3 (cancer or oncology or leuk?em\* or lymphom\* or h?ematol\*)) or ("teenage and  
26 young adult" near/3 cancer) or ("teenage and young adult" near/3 oncology) or (teenage\*  
27 near/3 cancer) or (teenage\* near/3 oncology) or (adolescen\* near/3 cancer) or (adolescen\*  
28 near/3 oncology) or ("young people" near/3 cancer) or ("young people" near/3 oncology) or  
29 ("teenage and young adult" near/3 leuk?emia\*) or (teenage\* near/3 leuk?emia\*) or  
30 (adolescen\* near/3 leuk?emia\*) or ("young people" near/3 leuk?emia\*) or ("young adult"  
31 near/3 leuk?emia\*) or ("teenage and young adult" near/3 h?ematol\*) or (teenage\* near/3  
32 h?ematol\*) or (adolescen\* near/3 h?ematol\*) or ("young people" near/3 h?ematol\*) or  
33 ("young adult" near/3 h?ematol\*) or ("teenage and young adult" near/3 lymphom\*) or  
34 (teenage\* near/3 lymphom\*) or (adolescen\* near/3 lymphom\*) or ("young people" near/3  
35 lymphom\*) or ("young adult" near/3 lymphom\*)) Results: 7793  
36  
37  
38  
39

40 3: TS=( Communicat\* or Disclos\* or inform\* or Interact\* or relationship\* or Conversation\*  
41 or Dialogue\* or triad\* or Interview\* or consult\* or "decision making")

42 Results: 11889093  
43  
44

45 4: TS= (affect\* or effect\* or influenc\* or resultant or impact\* or perception\* or perspective\*  
46 or encounter\* or preference or opinion or involvement or occurrence\* or feel or "go  
47 through" or experienc\*) Results: 24306121  
48

49 5: #4 AND #3 AND #2 AND #1 Results: 684  
50

51 6: #4 AND #3 AND #2 AND #1 Results: 684  
52  
53

54 7: #4 AND #3 AND #2 AND #1 and 2005 or 2006 or 2007 or 2008 or 2009 or 2010 or 2011 or  
55 2012 or 2013 or 2014 or 2015 or 2016 or 2017 or 2018 or 2019 or 2020 or 2021 or 2022  
56 (Publication Years) Results: 644  
57  
58  
59  
60

1  
2  
3  
4  
5  
6  
7  
8  
9  
10  
11  
12  
13  
14  
15  
16  
17  
18  
19  
20  
21  
22  
23  
24  
25  
26  
27  
28  
29  
30  
31  
32  
33  
34  
35  
36  
37  
38  
39  
40  
41  
42  
43  
44  
45  
46  
47  
48  
49  
50  
51  
52  
53  
54  
55  
56  
57  
58  
59  
60

8: #4 AND #3 AND #2 AND #1 and 2005 or 2006 or 2007 or 2008 or 2009 or 2010 or 2011 or 2012 or 2013 or 2014 or 2015 or 2016 or 2017 or 2018 or 2019 or 2020 or 2021 or 2022 (Publication Years) and English (Languages) Results: 619

For peer review only

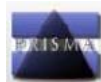

## PRISMA 2020 Checklist

| Section and Topic             | Item # | Checklist item                                                                                                                                                                                                                                                                                       | Location where item is reported         |
|-------------------------------|--------|------------------------------------------------------------------------------------------------------------------------------------------------------------------------------------------------------------------------------------------------------------------------------------------------------|-----------------------------------------|
| <b>TITLE</b>                  |        |                                                                                                                                                                                                                                                                                                      |                                         |
| Title                         | 1      | Identify the report as a systematic review.                                                                                                                                                                                                                                                          | Page 1                                  |
| <b>ABSTRACT</b>               |        |                                                                                                                                                                                                                                                                                                      |                                         |
| Abstract                      | 2      | See the PRISMA 2020 for Abstracts checklist.                                                                                                                                                                                                                                                         | Page 2                                  |
| <b>INTRODUCTION</b>           |        |                                                                                                                                                                                                                                                                                                      |                                         |
| Rationale                     | 3      | Describe the rationale for the review in the context of existing knowledge.                                                                                                                                                                                                                          | Pages 3 and 4                           |
| Objectives                    | 4      | Provide an explicit statement of the objective(s) or question(s) the review addresses.                                                                                                                                                                                                               | Page 4                                  |
| <b>METHODS</b>                |        |                                                                                                                                                                                                                                                                                                      |                                         |
| Eligibility criteria          | 5      | Specify the inclusion and exclusion criteria for the review and how studies were grouped for the syntheses.                                                                                                                                                                                          | Page 5                                  |
| Information sources           | 6      | Specify all databases, registers, websites, organisations, reference lists and other sources searched or consulted to identify studies. Specify the date when each source was last searched or consulted.                                                                                            | Page 4 and supplemental file            |
| Search strategy               | 7      | Present the full search strategies for all databases, registers and websites, including any filters and limits used.                                                                                                                                                                                 | Page 4, Table 1 and supplemental file 1 |
| Selection process             | 8      | Specify the methods used to decide whether a study met the inclusion criteria of the review, including how many reviewers screened each record and each report retrieved, whether they worked independently, and if applicable, details of automation tools used in the process.                     | Page 5                                  |
| Data collection process       | 9      | Specify the methods used to collect data from reports, including how many reviewers collected data from each report, whether they worked independently, any processes for obtaining or confirming data from study investigators, and if applicable, details of automation tools used in the process. | Pages 4 and 5                           |
| Data items                    | 10a    | List and define all outcomes for which data were sought. Specify whether all results that were compatible with each outcome domain in each study were sought (e.g. for all measures, time points, analyses), and if not, the methods used to decide which results to collect.                        | Page 5                                  |
|                               | 10b    | List and define all other variables for which data were sought (e.g. participant and intervention characteristics, funding sources). Describe any assumptions made about any missing or unclear information.                                                                                         | Page 5                                  |
| Study risk of bias assessment | 11     | Specify the methods used to assess risk of bias in the included studies, including details of the tool(s) used, how many reviewers assessed each study and whether they worked independently, and if applicable, details of automation tools used in the process.                                    | Page 5                                  |
| Effect measures               | 12     | Specify for each outcome the effect measure(s) (e.g. risk ratio, mean difference) used in the synthesis or presentation of results.                                                                                                                                                                  | Page 5                                  |
| Synthesis methods             | 13a    | Describe the processes used to decide which studies were eligible for each synthesis (e.g. tabulating the study intervention characteristics and comparing against the planned groups for each synthesis (item #5)).                                                                                 | Page 5                                  |
|                               | 13b    | Describe any methods required to prepare the data for presentation or synthesis, such as handling of missing summary statistics, or data conversions.                                                                                                                                                | Page 5                                  |
|                               | 13c    | Describe any methods used to tabulate or visually display results of individual studies and syntheses.                                                                                                                                                                                               | Page 5                                  |
|                               | 13d    | Describe any methods used to synthesize results and provide a rationale for the choice(s). If meta-analysis was performed, describe the model(s), method(s) to identify the presence and extent of statistical heterogeneity, and software package(s) used.                                          | Page 5                                  |



## PRISMA 2020 Checklist

| Section and Topic             | Item # | Checklist item                                                                                                                                                                                                                                                                       | Location where item is reported     |
|-------------------------------|--------|--------------------------------------------------------------------------------------------------------------------------------------------------------------------------------------------------------------------------------------------------------------------------------------|-------------------------------------|
|                               | 13e    | Describe any methods used to explore possible causes of heterogeneity among study results (e.g. subgroup analysis, meta-regression).                                                                                                                                                 | Pages 5 and 6                       |
|                               | 13f    | Describe any sensitivity analyses conducted to assess robustness of the synthesized results.                                                                                                                                                                                         | Not applicable                      |
| Reporting bias assessment     | 14     | Describe any methods used to assess risk of bias due to missing results in a synthesis (arising from reporting biases).                                                                                                                                                              | Not applicable                      |
| Certainty assessment          | 15     | Describe any methods used to assess certainty (or confidence) in the body of evidence for an outcome.                                                                                                                                                                                | Not applicable                      |
| <b>RESULTS</b>                |        |                                                                                                                                                                                                                                                                                      |                                     |
| Study selection               | 16a    | Describe the results of the search and selection process, from the number of records identified in the search to the number of studies included in the review, ideally using a flow diagram.                                                                                         | Figure 1 page 6                     |
|                               | 16b    | Cite studies that might appear to meet the inclusion criteria, but which were excluded, and explain why they were excluded.                                                                                                                                                          | Figure 1 page 6                     |
| Study characteristics         | 17     | Cite each included study and present its characteristics.                                                                                                                                                                                                                            | Table 2 – summary of articles pages |
| Risk of bias in studies       | 18     | Present assessments of risk of bias for each included study.                                                                                                                                                                                                                         | Not reported                        |
| Results of individual studies | 19     | For all outcomes, present, for each study: (a) summary statistics for each group (where appropriate) and (b) an effect estimate and its precision (e.g. confidence/credible interval), ideally using structured tables or plots.                                                     | Not applicable                      |
| Results of syntheses          | 20a    | For each synthesis, briefly summarise the characteristics and risk of bias among contributing studies.                                                                                                                                                                               | Not applicable                      |
|                               | 20b    | Present results of all statistical syntheses conducted. If meta-analysis was done, present for each the summary estimate and its precision (e.g. confidence/credible interval) and measures of statistical heterogeneity. If comparing groups, describe the direction of the effect. | Not applicable                      |
|                               | 20c    | Present results of all investigations of possible causes of heterogeneity among study results.                                                                                                                                                                                       | Not applicable                      |
|                               | 20d    | Present results of all sensitivity analyses conducted to assess the robustness of the synthesized results.                                                                                                                                                                           | Not applicable                      |
| Reporting biases              | 21     | Present assessments of risk of bias due to missing results (arising from reporting biases) for each synthesis assessed.                                                                                                                                                              | Not applicable                      |
| Certainty of evidence         | 22     | Present assessments of certainty (or confidence) in the body of evidence for each outcome assessed.                                                                                                                                                                                  | Not applicable                      |
| <b>DISCUSSION</b>             |        |                                                                                                                                                                                                                                                                                      |                                     |
| Discussion                    | 23a    | Provide a general interpretation of the results in the context of other evidence.                                                                                                                                                                                                    | Pages 10 and 11                     |
|                               | 23b    | Discuss any limitations of the evidence included in the review.                                                                                                                                                                                                                      | Pages 11 and 12                     |



## PRISMA 2020 Checklist

| Section and Topic                              | Item # | Checklist item                                                                                                                                                                                                                             | Location where item is reported |
|------------------------------------------------|--------|--------------------------------------------------------------------------------------------------------------------------------------------------------------------------------------------------------------------------------------------|---------------------------------|
|                                                | 23c    | Discuss any limitations of the review processes used.                                                                                                                                                                                      | Pages 11 and 12                 |
|                                                | 23d    | Discuss implications of the results for practice, policy, and future research.                                                                                                                                                             | Page 12                         |
| <b>OTHER INFORMATION</b>                       |        |                                                                                                                                                                                                                                            |                                 |
| Registration and protocol                      | 24a    | Provide registration information for the review, including register name and registration number, or state that the review was not registered.                                                                                             | Page 3                          |
|                                                | 24b    | Indicate where the review protocol can be accessed, or state that a protocol was not prepared.                                                                                                                                             | Supplemental file               |
|                                                | 24c    | Describe and explain any amendments to information provided at registration or in the protocol.                                                                                                                                            | Not applicable                  |
| Support                                        | 25     | Describe sources of financial or non-financial support for the review, and the role of the funders or sponsors in the review.                                                                                                              | Page 13                         |
| Competing interests                            | 26     | Declare any competing interests of review authors.                                                                                                                                                                                         | Page 13                         |
| Availability of data, code and other materials | 27     | Report which of the following are publicly available and where they can be found: template data collection forms; data extracted from included studies; data used for all analyses; analytic code; any other materials used in the review. | Page 13                         |

From: Page MJ, McKenzie JE, Bossuyt PM, Boutron I, Hoffmann TC, Mulrow CD, et al. The PRISMA 2020 statement: an updated guideline for reporting systematic reviews. *BMJ* 2021;372:n71. doi: 10.1136/bmj.n71  
 For more information, visit: <http://www.prisma-statement.org/>

# BMJ Open

## Triadic communication with teenagers and young adults with cancer: a systematic literature review: "Make me feel like I'm not the third person"

|                                 |                                                                                                                                                                                                                                                                                                                                                                                                                                                                                                                                            |
|---------------------------------|--------------------------------------------------------------------------------------------------------------------------------------------------------------------------------------------------------------------------------------------------------------------------------------------------------------------------------------------------------------------------------------------------------------------------------------------------------------------------------------------------------------------------------------------|
| Journal:                        | <i>BMJ Open</i>                                                                                                                                                                                                                                                                                                                                                                                                                                                                                                                            |
| Manuscript ID                   | bmjopen-2023-080024.R2                                                                                                                                                                                                                                                                                                                                                                                                                                                                                                                     |
| Article Type:                   | Original research                                                                                                                                                                                                                                                                                                                                                                                                                                                                                                                          |
| Date Submitted by the Author:   | 30-Jan-2024                                                                                                                                                                                                                                                                                                                                                                                                                                                                                                                                |
| Complete List of Authors:       | Critoph, Deborah; University of Cambridge, Department of Public Health & Primary Care<br>Taylor, Rachel; University College London Hospitals NHS Foundation Trust, CNMAR;<br>Spathis, Anna; University of Cambridge<br>Duschinsky, Robbie; University of Cambridge<br>Hatcher, Helen; Cambridge University Hospitals NHS Foundation Trust<br>Clyne, Ella; University of Cambridge<br>Kuhn, Isla; University of Cambridge, Medical Library, School of Clinical Medicine<br>Smith, Luke; Cambridge University Hospitals NHS Foundation Trust |
| <b>Primary Subject Heading</b>: | Communication                                                                                                                                                                                                                                                                                                                                                                                                                                                                                                                              |
| Secondary Subject Heading:      | Communication, Oncology, Patient-centred medicine, Paediatrics, Medical education and training                                                                                                                                                                                                                                                                                                                                                                                                                                             |
| Keywords:                       | Adolescents < Adolescent, Decision Making, EDUCATION & TRAINING (see Medical Education & Training), ONCOLOGY                                                                                                                                                                                                                                                                                                                                                                                                                               |
|                                 |                                                                                                                                                                                                                                                                                                                                                                                                                                                                                                                                            |

SCHOLARONE™  
Manuscripts





I, the Submitting Author has the right to grant and does grant on behalf of all authors of the Work (as defined in the below author licence), an exclusive licence and/or a non-exclusive licence for contributions from authors who are: i) UK Crown employees; ii) where BMJ has agreed a CC-BY licence shall apply, and/or iii) in accordance with the terms applicable for US Federal Government officers or employees acting as part of their official duties; on a worldwide, perpetual, irrevocable, royalty-free basis to BMJ Publishing Group Ltd ("BMJ") its licensees and where the relevant Journal is co-owned by BMJ to the co-owners of the Journal, to publish the Work in this journal and any other BMJ products and to exploit all rights, as set out in our [licence](#).

The Submitting Author accepts and understands that any supply made under these terms is made by BMJ to the Submitting Author unless you are acting as an employee on behalf of your employer or a postgraduate student of an affiliated institution which is paying any applicable article publishing charge ("APC") for Open Access articles. Where the Submitting Author wishes to make the Work available on an Open Access basis (and intends to pay the relevant APC), the terms of reuse of such Open Access shall be governed by a Creative Commons licence – details of these licences and which [Creative Commons](#) licence will apply to this Work are set out in our licence referred to above.

Other than as permitted in any relevant BMJ Author's Self Archiving Policies, I confirm this Work has not been accepted for publication elsewhere, is not being considered for publication elsewhere and does not duplicate material already published. I confirm all authors consent to publication of this Work and authorise the granting of this licence.

1  
2  
3 **Triadic communication with teenagers and young adults with cancer: a systematic literature**  
4 **review: “Make me feel like I’m not the third person”**  
5  
6

7 Deborah J Critoph MSc, Rachel M Taylor PhD, Anna Spathis MD, Robbie Duschinsky PhD,  
8 Helen Hatcher MD PhD, Ella Clyne, Isla Kuhn MSc, Luke AM Smith  
9  
10

11 Deborah Critoph, PhD student, Department of Public Health & Primary Care, University of  
12 Cambridge  
13  
14

15  
16 Rachel Taylor, Director of the CNMAR, Centre for Nurse, Midwife and Allied Health Profession  
17 Led Research, University College London Hospitals NHS Foundation Trust, London, NW1 2PG  
18  
19

20 Anna Spathis, Assistant Professor, Department of Public Health and Primary Care, University  
21 of Cambridge  
22  
23

24 Robbie Duschinsky, Professor of Social Science & Health, Department of Public Health &  
25 Primary Care, University of Cambridge  
26  
27

28 Helen Hatcher, Consultant in Medical and TYA Oncology, Clinical and Regional Lead for  
29 Sarcoma and Young People with Cancer, Clinical Director EoE TYAc ODN  
30  
31

32  
33 Ella Clyne, Medical Student, University of Cambridge  
34  
35

36 Isla Kuhn, Head of Medical Library Services, University of Cambridge Medical Library  
37  
38

39 Luke Smith, Junior Clinical Fellow in TYA Haematology and Oncology, Cambridge University  
40 Hospitals NHS Foundation Trust  
41  
42

43 Corresponding author: Deborah Critoph, [dc625@cam.ac.uk](mailto:dc625@cam.ac.uk)  
44  
45

46  
47 Keywords: Teenagers and young adults with cancer (TYAC), adolescents, triadic  
48 communication, communication, supporters, third person, parents, support network, health  
49 care, professionals, experiences, impact.  
50  
51

52 Abstract = 290/300  
53

54 Word count = 4,468  
55

56 Number of tables = 4  
57

58 Number of figures = 1  
59  
60

## Abstract

### Objectives

Clinical communication needs of teenagers and young adults with cancer (TYAC) are increasingly recognised to differ significantly from younger children and older adults. We sought to understand who is present with TYACs, TYACs experiences of triadic communication and its impact. We generated three research questions to focus this review:

1. Who is present with TYACs in healthcare consultations/communication?
2. What are TYACs' experiences of communication with the supporter present?
3. What is the impact of a TYAC's supporter being present in the communication?

### Design

Systematic review with narrative synthesis.

### Data sources

The search was conducted across six databases: Medline, CINAHL, Embase, PsycINFO, Web of Science and AMED for all publications up to December 2023.

### Eligibility criteria for selecting studies

Included papers were empirical research published after 2005; participants had malignant disease, diagnosed aged 13-24 years (for over 50% of participants); the research addressed any area of clinical communication.

### Data extraction and synthesis

Three independent reviewers undertook full text screening. A review-specific data extraction form was used to record participant characteristics and methods from each included paper and results relevant to the three review questions.

### Results

A total of 8,480 studies were identified in the search, of which 36 fulfilled the inclusion criteria. We found that mothers were the most common supporter present in clinical communication encounters. TYACs experiences of triadic communication are paradoxical in nature – the supporter can help or hinder the involvement of the young person in care related communication. Overall, young people are not included in clinical communication and decisions at their preferred level.

### Conclusion

Triadic communication in TYAC care is common, complex, and dynamic. Due to the degree of challenge and nuances raised, HCPs need further training on effective triadic communication.

PROSPERO registration number CRD42022374528

## Strengths & limitations of this study

- We searched systematically and thoroughly for eligible studies, but this is not a well-indexed field of research, and therefore it is possible that some relevant studies were not included in the review.
- We limited the review to a UK TYAC age range and not the broader age used elsewhere, so the conclusions are applicable to younger adults, up to aged 24 only and not necessarily the age of young adulthood used in some countries (between 29 to 39).
- We only included papers published in English and the results may not be applicable to other countries especially where cultural differences affect parental-TYAC or other familial/romantic relational dynamics.
- International representation was seen in the eligible studies and TYAC ages were included across the entirety of the specified UK age range.
- Studies represented the journey throughout the cancer experience from diagnosis to survivorship and end of life care.

## Introduction

Adolescence is a time of transition where young people navigate monumental physical, cognitive, emotional, and behavioural milestones to develop a sense of self-identity and gain independence. Although most young people have limited encounters with healthcare, around 2,500 young people in the United Kingdom (UK) are diagnosed with cancer each year, which is the leading cause of non-traumatic death in young people in the United States (US) and Europe.<sup>(1)</sup> Teenagers and young adults with cancer (TYACs) have unique healthcare needs and there has been an international drive to develop developmentally appropriate evidence-based specialist care, provided by appropriately trained healthcare professionals (HCPs).<sup>(2)</sup>

Communication with TYACs can be particularly challenging: a life-limiting condition intersects an age associated with emotional reactivity and variable maturity. TYACs clinical communication needs are increasingly recognised to differ significantly from younger children and older adults. Research indicates TYACs can have little meaningful involvement in conversations with HCPs: almost half of children and young people reported not being involved in decisions about their care.<sup>(3)</sup> HCPs recognise this and consider young people amongst the hardest patients to communicate with.<sup>(4)</sup> However, HCPs receive little training about how best to manage these clinical encounters. TYACs perceive that HCPs do not make efforts to understand how their cancer impacts their life outside of the healthcare setting. As a result, they may withdraw and subsequently be labelled as 'challenging', 'hard to reach' and 'disengaged'. This may adversely impact care and contribute to poor physical and psychological outcomes. Despite these issues, there are limited opportunities for formal postgraduate education in communication with TYACs for HCPs, with most training being ad hoc and not interprofessional.<sup>(5,6)</sup> Effective communication with TYACs has been recognised as a key national research priority. In a UK-wide survey of young patients' own research priorities, communication was a striking cross-cutting theme.<sup>(7)</sup>

Recent research into clinical communication with TYACs has offered some insight into the complexities of communication with this specialist patient group.<sup>(8–12)</sup> Yet one area that has

1  
2  
3 received less attention is triadic communication. Triadic communication refers to the  
4 presence of a third party, such as a parent, carer, or companion in clinical encounters (13)  
5 and the presence of such a person was found to occur in 87% of TYAC consultations.(11) As a  
6 commonly occurring form of communication in TYAC care, there is a need to understand the  
7 theoretical basis and relevance of triadic communication to clinical practice. For the purposes  
8 of this review, we refer to this third person as a supporter. Triadic communication literature  
9 from children and older adults exists. (14–17) Notably this includes a meta-analytic review of  
10 provider-patient-companion of adults,(18) one large systematic review of physician-patient-  
11 companion communication and decision-making in adults (19) and one review of doctor-  
12 parent-child communication.(20) Whilst informative, these studies are with children and  
13 adults, not this unique age-group of emerging adulthood with a significant life threatening  
14 diagnosis such as cancer. Also, these studies focus on doctor-patient-third person  
15 communication, whereas TYAC care involves a range of interdisciplinary professionals. This  
16 review aims to understand what is known about triadic communication with TYACs in  
17 healthcare communication.  
18  
19  
20  
21  
22

### 23 **Aim**

24 We sought to understand who is present with TYACs, synthesise TYACs experiences of triadic  
25 communication with HCPs and supporter(s), and develop insights into the impact of triadic  
26 communication for TYACs.  
27  
28  
29

### 30 **Review questions:**

- 31 1. Who is the supporter present with TYACs in healthcare consultations and  
32 communication?
- 33 2. What are TYACs' experiences of communication with the supporter present?
- 34 3. What is the impact on a TYAC's supporter being present in the communication?  
35  
36

### 37 **Methods**

38 We conducted a systematic review and narrative synthesis (21,22) of empirical evidence  
39 published since 2005, the year of publication of the National Institute for Care Excellence  
40 (NICE) Improving Outcomes Guidance, the guidance document underpinning TYAC services in  
41 England.(2) The review protocol was prospectively registered with PROSPERO  
42 (CRD42022374528). We designed the search to identify and map the available evidence using  
43 a broad scope to gain an overview of the pertinent literature, identify knowledge gaps and  
44 clarify concepts. The search strategy was developed and refined with an information scientist  
45 (I.K.). Keywords were generated across five strands detailed in Table 1, with strands combined  
46 with the Boolean operator 'AND'. The search was conducted across six databases: Medline,  
47 CINAHL, Embase, PsycINFO, Web of Science and AMED (supplementary file 1).  
48  
49  
50  
51  
52  
53  
54  
55  
56  
57  
58  
59  
60

**Table 1. Search Terms**Strand 1 – TYAC

TYA cancer or TYA oncology or teenage and young adult adj5 cancer or teenage and young adult adj5 oncology or teenage\* adj5 cancer or teenage\* adj5 oncology or adolescen\* adj 5 cancer or adolescen\* adj 5 oncology or young people adj 5 cancer or young people adj 5 oncology

Strand 2 – communication

Communication skills OR communicat\* OR discuss\* OR disclos\* OR inform\* OR interact OR relationship building OR decision making OR communication tools OR communication aids OR psychosocial assessment

Strand 3 – supporters

Parent\* or guardian\* or mother\* or father\* or partner or wife or wives or husband\* or boyfriend\* or girlfriend\* or sibling\* or friend\* or carer\* or "third person" or caregiver\* or "care-giver\*" or spouse\* or supporter\* or support network\*.

Strand 4 - impact

affect OR effect OR influence OR result OR resultant OR impact

Strand 5 - experience

encounter OR involvement OR occurrence OR feel OR "go through" OR experience\*

TYAC: teenage and young adult with cancer

Database searches were compiled and de-duplicated in Mendeley, abstracts were screened in Rayyan by two researchers (D.J.C and L.A.M.S.), and 172 full articles were read by three researchers (L.A.M.S., D.J.C., and R.M.T) for eligibility of inclusion in the final analysis, with disagreements resolved by discussion. Papers were included if: they presented empirical research published after 2005; participants had malignant disease, diagnosed aged 13-24 years (for over 50% of participants); the research addressed any area of clinical communication; and the research included supporters (parents, partners, carers, friends etc). Papers were excluded if they were: conference abstracts, unpublished articles, systematic reviews, single case studies, validation research methodology, studies using retrospective documentation in clinical notes, articles focusing on information needs rather than communication skills, or were not in English.

A review-specific data extraction form was used to record participant characteristics and methods from each included paper and results relevant to the three review questions. The final number of included articles totalled 36, the remaining 136 were excluded based on the participants' ages, focus on HCPs or information giving. In tandem to the data extraction process, two members of the review team (E.C. and D.J.C.) independently assessed each paper in terms of its internal validity, appropriateness, and contribution to answering the review questions, using a review-specific version of Gough's Weight of Evidence criteria.(23) Discrepancies in assessment decisions were discussed between reviewers and final scores were agreed through consensus.

Extracted data were entered into Excel to aid the narrative synthesis of the included papers.(21,22) All articles, irrespective of relevance and quality, were included in the review.

1  
2  
3 However, those rated 'medium' and 'high' were given greater weight in the synthesis. An  
4 inductive thematic analysis was undertaken to identify the main, recurrent, and important  
5 data across the studies related to answering each research question. D.J.C. and E.C. explored  
6 heterogeneity across the studies. The integration of results from studies utilising different  
7 methods and epistemological positions was supported by L.A.M.S. and R.M.T., and consensus  
8 in synthesis was reached. The synthesis was further refined through discussion of the review  
9 of results and their implications with clinicians, interdisciplinary academic audiences, and all  
10 of the co-authors.  
11  
12

## 13 Patient and Public Involvement Statement

14  
15  
16  
17 **None**  
18  
19

## 20 Results

21 A total of 8,480 studies were identified in the search, of which 36 fulfilled the inclusion criteria  
22 (Figure 1). The included articles are summarised in Table 2. (table 2 uploaded separately)  
23  
24

25 All points across the cancer trajectory were represented in the final papers: diagnosis (n=7);  
26 (12,24–29) on treatment (n=17); (30–46) end of treatment (completed within one year) (n=2);  
27 (47,48) survivorship (more than one-year post-treatment) (n=2); (5,49) and end of life care  
28 (n=5). (50–54) Three studies included patients at more than one point along the cancer care  
29 continuum. (55–57) Most studies (n=19) were conducted in the US (24,27–29,31,35–37,39–  
30 46,50,52,54) other countries included the UK, (25,32,33) Australia, (38,48,49,57) Norway,  
31 (12,53) Israel, (47) Iran, (30) Mexico, (51) France, (34) Denmark, (26) Korea (56) and Taiwan,  
32 (55) one study recruited from three European countries. (5) Studies used predominantly  
33 qualitative methods (n=32) but there were two mixed methods studies and two using  
34 quantitative methods. Weight of evidence (WoE) criteria indicated five were high evidence,  
35 (24,31,35,45,56) twenty-four were medium (5,12,25,27–30,32–34,36,37,39–42,44,46,47,49–  
36 51,55,57) and seven were low evidence. (26,38,43,48,52–54) We used Gough's review  
37 specific criteria to weight the quality of each paper. (23) To do this, we used three parameters:  
38  
39

- 40 A) The integrity of the evidence on its own terms
  - 41 B) The appropriateness of the method for answering the review questions
  - 42 C) The appropriateness of the focus or relevance for answering the review questions
- 43  
44  
45

46 Each of the above was either rated as low, medium, or high. These 3 parameters were  
47 combined to create WoE D which was the overall rating seen above and is the extent to which  
48 a study contributes evidence to answering the review questions. Factors that made the  
49 method highly appropriate included the use of semi-structured interviews to understand  
50 TYAC experiences and speaking to the TYAC and supporter separately. The high scoring papers  
51 included papers that focussed on communication in the triad, but this only occurred in 10  
52 papers. In 9 papers the age at diagnosis was not specified and this decreased the weighting  
53 of these papers. (5,34–36,50–54)  
54  
55

56 Of the included studies just less than one third researched the triad (n=10) of TYAC,  
57 supporters and HCP (5,24,30–32,34–36,50,51), one third TYAC only (n=12)  
58  
59  
60

(28,29,33,37,38,40–42,44–46,48) and just over a third TYAC and supporters (n=14). (12,25–27,39,43,47,49,52–57)

Table 3 Study population

*Participants included in the study and numbers of papers included for each of the three participant groups*

| Triad? Dyad? Single? | Who is studied in the paper? | Number of papers | References                      |
|----------------------|------------------------------|------------------|---------------------------------|
| Triad                | TYAC, supporter, HCA         | 10               | (5,24,30–32,34–36,50,51)        |
| Dyad                 | TYAC and supporter           | 14               | (12,25–27,39,43,47,49,52–57)    |
| Single               | TYAC only                    | 12               | (28,29,33,37,38,40–42,44–46,48) |

The categories used to separate the age groups were lower adolescence (11-14 years), middle adolescence (15-17 years), upper adolescence (18-21 years) and emerging adulthood (22 onwards). Of the papers where the age range at diagnosis could be deduced, the majority of these (21 out of 24) spanned three or more age categories. All the papers spanned two or more age categories. In nine of the papers, the age ranges at diagnosis were not available (as age at diagnosis was expressed as a mean or median). Given these factors, it is difficult to ascertain whether any between age group differences exist.

#### **Who is present with TYACs in healthcare consultations and communication?**

The majority of supporters were mothers (68.9%). When combined, parents represented nearly all the supporters in the included studies (94.6%), see Table 4. Non-parental supporters (1.8%) included partners, sisters, aunts, and grandmothers. The remaining supporters were not categorised due to insufficient information in the article's demographics data (3.9%).(53,54)



Table 4 Supporter Demographics

*Details of the supporter demographics and percentages of within the included publications*

| Supporter type                        | Number of supporters | Percentage quoted to 1 decimal place (%) | References                                    |
|---------------------------------------|----------------------|------------------------------------------|-----------------------------------------------|
| "Mother"                              | 453                  | 68.9                                     | (5,12,24–27,30–32,34,36,39,43,47,49–52,54,55) |
| "Father"                              | 128                  | 19.5                                     | (5,12,25–27,30–32,34,36,39,43,47,49–52,55–57) |
| "Both parents"                        | 20                   | 3.0                                      | (12,32,34,36,55)                              |
| "Parents" no further specification    | 20                   | 3.0                                      | (35)                                          |
| "Stepmother"                          | 1                    | 0.2                                      | (57)                                          |
| "Grandmother"                         | 2                    | 0.3                                      | (24)                                          |
| "Sister"                              | 3                    | 0.5                                      | (12,30,51)                                    |
| "Partner"                             | 3                    | 0.5                                      | (25,52)                                       |
| "Aunt"                                | 3                    | 0.5                                      | (36,51,52)                                    |
| "Supporters" no further specification | 21                   | 3.2                                      | (53,54)                                       |
| "Other"                               | 3                    | 0.5                                      | (55)                                          |
| <b>Total</b>                          | <b>657</b>           | <b>100.1</b>                             |                                               |

### What are TYACs' experiences of communication with the supporter present?

The presence of supporters was concurrently helpful and challenging for TYACs. Supporters undertook several helpful roles and responsibilities: they asked questions on behalf of the TYAC, retained information from HCPs, acted as a conduit of information between the TYAC and HCP, and acted as a "sounding board" for the young person.(25,31,45) Some supporters promoted self-advocacy and autonomy for the young person.(27,39,41,46,57) Some reported symptoms on their behalf (45) and proactively negotiated changes to treatment schedules in the interest of the young person.(39)

Findings also suggested that young people could experience limited or ineffective communication in the presence of a supporter. Communication could be directed towards the supporter, not the young person.(27,29,31,36) Supporters could receive information in the absence of the TYAC and subsequently filter the content before delivering the information to TYACs.(30,33,34,55,56): *"The parents had hidden a truth that was not theirs to hide"*p533.(34) This reflected the broader predicament that supporters' priorities at times might have competed with those of young people. (25,34,50,51) Supporters could dominate the communication encounter, for instance, parents were seen to interrupt young people, especially when time was limited. (51) Frederick et al found the mean time for adolescent to clinician communication was only 5.5% of the total consultation and parent conversation

1  
2  
3 turns directed towards clinicians comprised a mean of 37.5% of all conversation turns.  
4 Clinicians directed most communication at the parent rather than the adolescent and spoke  
5 for 66.9% of the conversation and none of the clinicians offered patients the opportunity to  
6 speak with them alone. (35)  
7  
8

9 Mutual protectionism appeared to occur, with TYACs and supporters seeking to protect each  
10 other from difficult information leading to non-disclosure when both were present. A  
11 diagnosis of cancer is devastating for the young person, supporter(s), family, and the wider  
12 social network. Repeatedly, there were references to reduced disclosure between the young  
13 person and their supporter, in an attempt to shield each other from emotional  
14 distress.(12,31,36,38,39,41,45,53,56) TYACs could experience discomfort and guilt in seeing  
15 parents tearful and worried, and felt a burden in response to observing the emotions of  
16 supporters.(38,39,52) Some TYACs sought to limit this by withholding concerns to protect  
17 their supporters: *"I couldn't talk to mum about my concerns because I didn't want to hurt her"*  
18 p 37.(38) In equal measure, supporters were characterised as working hard to stay in control  
19 of emotions, be strong and stay in the "now", and they channelled energy into  
20 helping.(12,31,56) Yet this could contribute to an environment of non-disclosure that had the  
21 potential to create future communication challenges, such as supporters not knowing the  
22 young person's wishes. Examples of this were evident within the end of life care  
23 studies.(52,53) Friebert et al found that 86% of young people wanted to receive prognostic  
24 information as soon as possible but only 39% of families knew that.(52) Similarly, Jacobs et al  
25 found that young people's end of life wishes were not known by their families.(53) In  
26 instances where the young person may not be able to communicate, it may help families  
27 relieve the impossible burden of making difficult decisions or feelings of regret, if the young  
28 person's perspective and wishes are known.(54)  
29  
30  
31  
32  
33  
34

### 35 **What is the impact of a TYAC's supporter being present in the communication?**

36  
37 Supporters have the potential to facilitate, complicate or obstruct the young person's  
38 involvement in decision-making. Involvement had a positive impact on recall,(42) and may  
39 improve autonomy, efficacy, adherence, and future self-management.(24,57) However, the  
40 participation of supporters may be experienced as stressful by TYAC as they may become side-  
41 lined. (25,40,55) The presence of supporters impacted the young person's level of  
42 involvement in decision-making in several ways. In some cases, supporters empowered TYACs  
43 to make decisions by withholding their opinion (27) and deferring the final decision to  
44 TYACs.(31) However, supporters and TYACs did not perceive decision-making in the same  
45 way.(47,56) Supporters believed that young people oversaw decisions about their care;  
46 however, this was not what young people recounted.(24) TYACs reported a lack of  
47 communication and limited involvement in decisions (24,29,30,46) associated later with  
48 decisional regret.(24,37)  
49  
50  
51  
52

53 Deferral of communication and decisions from the young person to supporters was  
54 commonplace.(27,31,36) When supporters responded to this pathway of communication,  
55 young people then did not see a need to participate in decisions, knowing that their supporter  
56 was taking the mantle.(36) In parallel, clinicians were found to direct communication towards  
57 supporters and in extreme cases young people were completely excluded from  
58 communication and decisions. (29,30,35,47) An atmosphere characterised by a lack of trust,  
59  
60

1  
2  
3 unanswered questions and uncertainty contributed to the exclusion of young people who  
4 then sought information from other sources.(30,36,39,56) Not allowing TYACs to choose their  
5 involvement in decision-making violated their autonomy, and increased distrust or  
6 resentment of providers and supporters and resulted in lower treatment  
7 adherence.(30,36,39)  
8  
9

10 The decisional involvement preferences of young people were not static: they were context  
11 and environment dependent. At diagnosis, heightened emotions and poor health rendered  
12 young people unable to engage in communication. (24,25,27,29,31,37,41) TYACs expressed a  
13 desire to be involved in decision making at different levels: some wanted limited involvement  
14 from their supporter(s) so they could take the leading role in consultations and their care;(58)  
15 several wanted collaboration with supporters and clinicians;(26,27,44,57) and some  
16 completely relied on supporters and HCP's to make decisions on their behalf.(45,46) Davies  
17 et al described this as agency, the ability to make free and independent choices. They  
18 highlighted the normality of this fluctuation between personal (acting independently), proxy  
19 (decisions made on behalf of someone) and collective (decisions are shared) decision making.  
20 Whilst this was not always linear, it was part of the cancer trajectory and demonstrated the  
21 fluctuating personal agency for TYACs.(32) Some young people reported that supporters and  
22 clinicians decided on the their level of involvement in communication and decision-  
23 making,(55) and TYACs commented that they did not feel the decision was theirs.(47)  
24 Decisional involvement was an interactive, complex, and multifaceted process within the  
25 context of the triad, and young people often wanted to be in control of their level of  
26 involvement.(28,31) The evidence highlighted that in the presence of a supporter, young  
27 people's choice in the their level of involvement in decisions was challenged and not routinely  
28 achieved.  
29  
30  
31  
32  
33  
34

35 Most TYACs felt that it was important for the healthcare team to communicate with them  
36 directly and openly.(30,31,33,38,39,49,50) Time alone helped facilitate communication  
37 between TYAC and HCP, to ensure that the young person's needs were fully met.(31,36)  
38 However, time alone with HCPs was not routinely integrated as a part of consultations with  
39 TYACs. (35,48) In fact, clinicians were reported as frequently speaking more to parents and  
40 TYACs received limited communication from HCPs.(27,31,35,36) In the presence of  
41 supporters, as well as withholding concerning information, young people reported feeling  
42 discomfort when discussing sensitive topics such as sex or fertility preservation.(27,36)  
43  
44  
45

46 Young people wanted time alone to communicate with HCPs directly for a variety of reasons.  
47 This private line of communication offered a sense of personal agency and allowed them to  
48 feel "in the loop" and promoted a sense of autonomy that was threatened by the cancer  
49 diagnosis, particularly at the point of diagnosis.(32,50) Young people wanted space to think  
50 and privacy during the cancer journey; private lines of communication with HCPs actively  
51 promoted this.(31,39,45,46) It also enabled HCPs to get to know the young person and  
52 allowed them to ask questions that they may be reluctant to ask in the presence of their  
53 supporter, because of embarrassment or emotional shielding.(31) Darabos et al found that  
54 87.5% of oncology providers considered it important to talk to the TYAC without their parents  
55 present.(31) Whilst the importance has been highlighted within the data it is also evident that  
56 this does not happen as part of routine clinical practice. This could be for several reasons such  
57  
58  
59  
60

1  
2  
3 as not wanting to challenge rules of authority, uncertainty around how best to ask a parent  
4 to leave and lack of confidence when communicating with a young person alone.  
5  
6  
7  
8  
9

## 10 Discussion

### 11 12 Principal Findings

#### 13 14 15 **Who is present with TYACs in healthcare consultations and communication? For example, who are** 16 **the supporters?**

17  
18 The included papers in our review demonstrated that most supporters were parents, more  
19 commonly mothers. The frequent presence of mothers in consultations is consistent with  
20 previous findings. For example, in a UK study in which TYAC nominated a caregiver, 85% were  
21 parents, and of those 80% were female.(59) We note that there is a paucity of data for non-  
22 parental supporters, and this may represent a reality of clinical practice or a bias towards  
23 TYAC-parental dyads over other relational-dyads in this field of research to date.  
24  
25  
26  
27

#### 28 **What are TYACs' experiences of communication with the supporter present?**

29 TYACs experienced supporters facilitating communication by obtaining information, asking  
30 questions, advocating, and supporting personal agency of the young person; conversely  
31 supporters could hinder communication by gatekeeping information, or dominating  
32 communication and thereby rendering young people as bystanders. Young people  
33 experienced negative emotions in response to witnessing their supporters in distress.  
34  
35  
36  
37

#### 38 **What is the impact of a TYAC's supporter being present in the communication?**

39 Bidirectional non-disclosure was a coping strategy used by both TYACs and supporters to  
40 protect one another from concerns and emotional burden. This limited HCPs ability to  
41 effectively assess ideas, concerns, and expectations from both parties when together. In the  
42 presence of supporters some young people were less informed, which could impair their  
43 ability to engage in decision-making conversations.  
44  
45  
46  
47

### 48 49 **Meaning of the study**

50 This is the first review to look specifically at triadic communication in teenagers and young  
51 adults with cancer and has demonstrated that there is a paucity of evidence focussed  
52 specifically on triadic communication with TYACs. Of the thirty-six studies in the review less  
53 than one third included all three parties in the triadic communication encounter. However,  
54 the review has enabled us to provide answers to the review questions and identify knowledge  
55 gaps, including a lack of theory describing triadic communication. Some preliminary  
56 theoretical models, such as family involvement in interpersonal healthcare processes,(60)  
57 depict the interaction pathways between patients, families and HCP and hypothesise the  
58 influence of family on interpersonal processes and outcomes of medical consultations.  
59  
60

1  
2  
3  
4  
5 The data has clearly identified that parents are the predominating supporter for TYACs, which  
6 may be surprising given the inclusion of participants up to the age of 25. Parents can play a  
7 significant role when a young person is diagnosed with cancer. Developmentally, a major  
8 characteristic that differentiates TYACs from younger children or older adults is the  
9 progressive increase in their desire and capacity for independence, personal agency, and  
10 autonomy. This process is disrupted by a cancer diagnosis: increased parental presence can  
11 be perceived as intrusive and reflect reversion to an earlier family dynamic, anchoring TYACs  
12 in dependency, restricting self-exploration, and limiting their developing of an internal value  
13 and belief system.(38,61–63) This has been phrased as ‘retreating to family’ and can  
14 negatively impact peer relationships by impeding development and maintenance of a peer  
15 network.(40,64,65) Young people may often be accepting of this, particularly in the early  
16 stages of the cancer diagnosis. However, as this review demonstrates, the presence of parents  
17 alters the experience and impact of communication with HCPs. It is important to highlight  
18 that there is limited literature on TYAC communication encounters with supporters other than  
19 parents.(62,66,67) Partners felt relegated to a non-participatory role by a parent, and  
20 mothers struggled to relinquish their existing role as primary supporter.(62,67) It is relevant  
21 to note that the participants in these three studies were in their early 20’s.  
22  
23  
24  
25

26  
27 A key impact of triadic communication is that young people may not be involved in decision  
28 making to the level they want. This is consistent with related paediatric oncology literature  
29 which consistently reports children’s limited participation in decision-making. (68–70)  
30 Clinicians attempted to protect children from ‘too much’ information because of the  
31 perception that children are not capable or too vulnerable.(17) The important difference  
32 between paediatric and TYAC populations are the legal and ethical obligations towards TYACs  
33 who are autonomous, capacitous patients rather than to parents with parental responsibility.  
34  
35

36  
37 The findings of this review demonstrate the presence of a supporter impacts the involvement  
38 of young people in healthcare decisions. Therefore, there are legal and ethical issues, which  
39 are critically important, both in research and clinically in TYAC care particularly related to  
40 informed consent, capacity, and autonomy. The law relating to children and young people is  
41 complex and differs across the UK and internationally. The General Medical Council guidelines  
42 in the UK state, “the patient must be the first concern”.(71) HCPs have ethical and legal  
43 obligations outlined in UK best practice guidance, statute, and case law.(72) In the UK, parents  
44 can legally make decisions for children under 16 years unless the child disagrees and is  
45 deemed ‘Gillick Competent’.(73) Moreover, studies have shown children aged 14 and older  
46 can approach the level of understanding of adults.(74,75) In contrast, people aged 16 and  
47 above are legally able to make decisions for themselves in the UK and are automatically  
48 assumed to have capacity (76) and therefore, HCPs must communicate with them in  
49 developmentally appropriate ways. Clinicians face a challenge in identifying the best way to  
50 communicate with TYACs and their supporter (s). TYACs need parental involvement whilst  
51 simultaneously desiring autonomy (36) necessitating careful balancing of the needs of both  
52 parties to ensure that the young person is not relegated to a non-participant status.  
53  
54  
55  
56

### 57 **Strengths and weaknesses**

58  
59  
60

1  
2  
3 Our review had a number of limitations. We searched systematically and thoroughly for  
4 eligible studies, but this is not a well-indexed field of research, and therefore it is possible that  
5 some relevant studies were not included in the review. We limited the review to a UK TYAC  
6 age range and not the broader age used elsewhere, so the conclusions are applicable to  
7 younger adults, up to aged 24 only and not necessarily the age of young adulthood used in  
8 some countries (between 29 to 39). We also only included papers published in English and  
9 therefore papers reflect practices in primarily North America, Australia and Europe, the  
10 results may not be applicable to other countries especially where cultural differences affect  
11 parental-TYAC or other familial/romantic relational dynamics and where the healthcare  
12 culture may be different, e.g., more paternalistic. Despite these limitations, international  
13 representation was seen in the eligible studies, TYAC ages were included across the entirety  
14 of the specified UK age range and studies represented the journey throughout the cancer  
15 experience.  
16  
17  
18  
19

### 20 21 **Implications for clinicians and policy makers**

22  
23 Given the degree of challenge and nuance raised, HCPs need training on effective triadic  
24 communication. Fournoret concluded that the relationship between TYACs, their parents and  
25 HCPs “as being the most difficult one in oncology”.(34) Professionals described challenges  
26 communicating with both TYACs and parents, especially when loyalties were torn between  
27 the two.(5) However, training is currently ad hoc and not interdisciplinary.(77–80)  
28 Furthermore, HCPs can find it difficult to apply teaching in this area in clinical practice.(53,81)  
29 HCPs need education and training to navigate triadic communication to optimise involvement  
30 of the young person whilst attending to a supporter’s needs. Experiential learning is the gold  
31 standard in teaching methods for clinical communication and is designed to bring about  
32 changes in learners’ skills. These evidence-based methods are through small group, problem-  
33 based simulation in a classroom, with repeated practise and rehearsal of skills under  
34 observation with detailed and descriptive feedback. This is arguably warranted here.(82,83)  
35  
36  
37  
38

39 Triadic communication is a key feature of TYAC care but requires further attention and  
40 inclusion in future iterations of key policy documents and guidelines such as the Blueprint of  
41 Care (BoC).(84) The BoC is a UK document that helps shape and deliver developmentally  
42 appropriate care to TYAC. However, it is recognised that age is poorly correlated with  
43 developmental maturity and therefore any communication framework needs to be specific  
44 to TYACs, recognising the transitional nature of adolescence meaning a one size fits all  
45 approach is likely inadequate.  
46  
47  
48

### 49 **Unanswered questions and future research**

50  
51 Future research is warranted to triangulate triadic perspectives and understand more about  
52 the interactional dynamics of these complex communication encounters. A key research need  
53 is investigating how best to support decision-making whilst engaging supporters,  
54 understanding their priorities and information needs may conflict.(31,36,37,40) Conflict  
55 management must also be understood in the emotional context of young adult oncology. How  
56 to effectively educate HCPs to communicate within the triad, to ensure the young person and  
57 the supporters needs are met is a priority. This needs to include how best we facilitate time  
58  
59  
60

1  
2  
3 alone between young patients and HCPs. Continued development and utilisation of  
4 comprehensive triadic theoretical frameworks may provide guidance and direction for future  
5 research, allowing for greater integration and progress with this diverse research area and  
6 commonly occurring form of healthcare communication.  
7  
8

## 9 **Conclusion**

10  
11  
12 Triadic communication is a pivotal component of communicating with TYACs and the  
13 presence of supporters impacts clinical communication both positively and negatively. Young  
14 people desire a sense of personal agency, autonomy and control related to information flow  
15 and decision making. This includes private lines of communication with HCPs without the  
16 presence of supporters. HCPs recognise the importance of time alone with young people;  
17 however this does not translate to clinical practice. Therefore, further research on  
18 communication dynamics is needed to allow for the development of bespoke, TYAC focussed  
19 clinical communication training for HCPs to allow them to effectively facilitate and navigate  
20 triadic communication. This then needs to be formally embedded in national guidance and  
21 postgraduate training for HCPs working in TYAC care to allow equitable access for TYACs.  
22  
23  
24  
25  
26  
27  
28  
29  
30

## 31 **Author Contributions:**

32 DC, LS and RT were involved in developing the protocol; DC, IK and LS coordinated the running  
33 of the study and were responsible for data acquisition; DC, LS, RT and EC contributed to the  
34 analysis; DC drafted the manuscript. All authors have critically reviewed the manuscript for  
35 important intellectual content and have read and agreed to the published version of the  
36 manuscript. All authors agree to be accountable for all aspects of the work in ensuring that  
37 questions related to the accuracy or integrity of any part of the work are appropriately  
38 investigated and resolved.  
39  
40

## 41 **Conflicts of Interest:**

42 The authors declare no conflict of interest.  
43  
44

## 45 **Ethics Approval:**

46 This was a systematic review and therefore ethics approval was not required.  
47  
48

## 49 **Funding:**

50 This paper presents work supported by the Wellcome Trust, (grant number G115288) under  
51 its Programme PhD for healthcare professionals course awarded to the first author Deborah  
52 Critoph, University of Cambridge. R.M.T. is partially funded through UCLH Charity. The views  
53 expressed are those of the author (s) and not necessarily those of the Wellcome Trust or UCLH  
54 Charity.  
55  
56

## 57 **Data availability statement:**

58 All data relevant to the study are included in the article or uploaded as supplementary  
59 information. No previously unpublished primary data are included in the paper. All data  
60

relevant to the systematic review are included in the paper or uploaded as supplementary information.

#### Figure Legends:

Figure 1: PRISMA Flow diagram

Table 1: Search terms

Table 2: Summary of articles

Table 3: Study Population

*Participants included in the study and numbers of papers included for each of the three participant groups*

Table 4: Supporter Demographics

*Details of the supporter demographics and percentages of within the included publications*

#### References:

1. Cancer Research UK. Young peoples' cancers incidence statistics [Internet]. 2016 [cited 2019 Jul 10]. Available from: <https://www.cancerresearchuk.org/health-professional/cancer-statistics/young-people-cancers/incidence>
2. National Institute of Health and Clinical Excellence. Guidance on Cancer Services Improving Outcomes in Children and Young People with Cancer National Institute for Health and Clinical Excellence [Internet]. Nice. 2005. 198 p. Available from: <https://www.nice.org.uk/guidance/csg7/resources/improving-outcomes-in-children-and-young-people-with-cancer-update-pdf-773378893>
3. Care Quality Commission., NHS Patient Survey Programme. 2018 Children and Young People's patient experience survey. Statistical Release. 2019;(November).
4. White B, Viner RM. Improving communication with adolescents. Arch Dis Child Educ Pract Ed. 2012;97(3):93–7.
5. Essig S, Steiner C, Kuehni CE, Weber H, Kiss A. Improving Communication in Adolescent Cancer Care: A Multiperspective Study. Pediatr Blood Cancer [Internet]. 2016;63(8):1423–30. Available from: [http://onlinelibrary.wiley.com/journal/10.1002/\(ISSN\)1545-5017](http://onlinelibrary.wiley.com/journal/10.1002/(ISSN)1545-5017)
6. Lea S, Gibson F, Taylor RM. Holistic Competence": How Is it Developed, Shared, and Shaped by Health Care Professionals Caring for Adolescents and Young Adults with Cancer? J Adolesc Young Adult Oncol. 2021;10(5):503–11.
7. Gibson F, Aldiss S, Fern LA, Phillips B, Gravestock H, Malik S, et al. Reporting the whole story: Analysis of the "out-of-scope" questions from the James Lind Alliance Teenage and Young Adult Cancer Priority Setting Partnership Survey. Health Expect. 2021;



- 1
  - 2
  - 3
  - 4
  - 5
  - 6
  - 7
  - 8
  - 9
  - 10
  - 11
  - 12
  - 13
  - 14
  - 15
  - 16
  - 17
  - 18
  - 19
  - 20
  - 21
  - 22
  - 23
  - 24
  - 25
  - 26
  - 27
  - 28
  - 29
  - 30
  - 31
  - 32
  - 33
  - 34
  - 35
  - 36
  - 37
  - 38
  - 39
  - 40
  - 41
  - 42
  - 43
  - 44
  - 45
  - 46
  - 47
  - 48
  - 49
  - 50
  - 51
  - 52
  - 53
  - 54
  - 55
  - 56
  - 57
  - 58
  - 59
  - 60
8. Smith LAM, Critoph DJ, Hatcher HM. How Can Health Care Professionals Communicate Effectively with Adolescent and Young Adults Who Have Completed Cancer Treatment? A Systematic Review. *J Adolesc Young Adult Oncol* [Internet]. 2020 Jan 14; Available from: <https://doi.org/10.1089/jayao.2019.0133>
9. Reid J, McKeaveney C, Martin P. Communicating with Adolescents and Young Adults about Cancer-Associated Weight Loss. *Curr Oncol Rep*. 2019;21(2):6.
10. Phillips CR, Haase JE. A Connectedness Primer for Healthcare Providers: Adolescents/Young Adult Cancer Survivors' Perspectives on Behaviors That Foster Connectedness during Cancer Treatment and the Resulting Positive Outcomes. *J Adolesc Young Adult Oncol* [Internet]. 2018;7(2):174–80. Available from: <http://www.liebertpub.com/products/product.aspx?pid=387>
11. Mellblom A V, Finset A, Korsvold L, Loge JH, Ruud E, Lie HC. Emotional concerns in follow-up consultations between paediatric oncologists and adolescent survivors: a video-based observational study. *Psychooncology* [Internet]. 2014 Dec;23(12):1365–72. Available from: <https://search.ebscohost.com/login.aspx?direct=true&AuthType=athens&db=cin20&AN=109768272&site=ehost-live>
12. Korsvold L, Mellblom AV, Finset A, Ruud E, Lie HC. A content analysis of emotional concerns expressed at the time of receiving a cancer diagnosis: An observational study of consultations with adolescent and young adult patients and their family members. *European Journal of Oncology Nursing* [Internet]. 2017;26:1–8. Available from: <https://search.ebscohost.com/login.aspx?direct=true&AuthType=sso&db=cin20&AN=120589318&site=ehost-live&custid=ns123475>
13. Ward A, Critoph D, Westacott R, Williams R, Dogra N. A collaboration on teaching and assessing triadic consultation skills. *PEC Innovation* [Internet]. 2022;1(October):100091. Available from: <https://doi.org/10.1016/j.pecinn.2022.100091>
14. van Staa AL. Unraveling triadic communication in hospital consultations with adolescents with chronic conditions: The added value of mixed methods research. *Patient Educ Couns*. 2011;82(3):455–64.
15. Cahill P, Papageorgiou A. Triadic communication in the primary care paediatric consultation: A review of the literature. *British Journal of General Practice*. 2007;57(544):904–11.
16. Maras M. Hidden in plain sight. *Int J Psychiatry Med*. 2022;57(6):481–5.
17. Young B, Dixon-woods M, Windridge KC, Heney D. Study of Patients and Parents. *Br Med J*. 2003;326(7384):305.
18. Wolff JL, Roter DL. Family presence in routine medical visits: A meta-analytical review. *Soc Sci Med* [Internet]. 2011;72(6):823–31. Available from: <http://dx.doi.org/10.1016/j.socscimed.2011.01.015>
19. Laidsaar-Powell RC, Butow PN, Bu S, Charles C, Gafni A, Lam WWT, et al. Physician-patient-companion communication and decision-making: A systematic review of triadic medical consultations. *Patient Educ Couns*. 2013;91(1):3–13.
20. Tates K, Meeuwesen L. Doctor-parent-child communication. A (re)view of the literature. *Soc Sci Med*. 2001;52(6):839–51.
21. Popay J, Roberts, H SA et al. Guidance on the Conduct of Narrative Synthesis in Systematic Reviews.

- 1
  - 2
  - 3
  - 4
  - 5
  - 6
  - 7
  - 8
  - 9
  - 10
  - 11
  - 12
  - 13
  - 14
  - 15
  - 16
  - 17
  - 18
  - 19
  - 20
  - 21
  - 22
  - 23
  - 24
  - 25
  - 26
  - 27
  - 28
  - 29
  - 30
  - 31
  - 32
  - 33
  - 34
  - 35
  - 36
  - 37
  - 38
  - 39
  - 40
  - 41
  - 42
  - 43
  - 44
  - 45
  - 46
  - 47
  - 48
  - 49
  - 50
  - 51
  - 52
  - 53
  - 54
  - 55
  - 56
  - 57
  - 58
  - 59
  - 60
22. Petticrew M RH. Systematic Reviews in the social sciences. In: Systematic reviews in the social sciences [Internet]. Available from: <https://onlinelibrary.wiley.com/doi/book/10.1002/9780470754887>
23. Gough D. Weight of Evidence: a framework for the appraisal of the quality and relevance of evidence. 2007 [cited 2023 Jul 2]; Available from: <https://www.tandfonline.com/action/journalInformation?journalCode=rred20>
24. Barakat LP, Schwartz LA, Reilly A, Deatrck JA, Balis F. A Qualitative Study of Phase III Cancer Clinical Trial Enrollment Decision-Making: Perspectives from Adolescents, Young Adults, Caregivers, and Providers. *J Adolesc Young Adult Oncol*. 2014;3(1):3–11.
25. Hart RI, Cameron DA, Cowie FJ, Harden J, Heaney NB, Rankin D, et al. The challenges of making informed decisions about treatment and trial participation following a cancer diagnosis: a qualitative study involving adolescents and young adults with cancer and their caregivers. *BMC Health Serv Res*. 2020;20(1).
26. Ingersgaard MV, Tulstrup M, Larsen HB, Schmiegelow Kjeld AO - Ingersgaard MVO <http://orcid.org/0000000270372104>. A qualitative study of decision-making on Phase III randomized clinical trial participation in paediatric oncology: Adolescents' and parents' perspectives and preferences. *J Adv Nurs*. 2018;74(1):110–8.
27. Olsavsky AL, Theroux CI, Dattilo TM, Klosky JL, O'Brien SH, Quinn GP, et al. Family communication about fertility preservation in adolescent males newly diagnosed with cancer. *Pediatr Blood Cancer*. 2021;68(7).
28. Weaver MS, Baker JN, Gibson D V, Gattuso JS, Hinds PS, Gibson D V, et al. “Being a good patient” during times of illness as defined by adolescent patients with cancer. *Cancer* [Internet]. 2016 Jul 15;122(14):2224–33. Available from: [http://onlinelibrary.wiley.com/journal/10.1002/\(ISSN\)1097-0142](http://onlinelibrary.wiley.com/journal/10.1002/(ISSN)1097-0142)
29. Mobley EM, Thomas SM, Brailsford J, Ochoa CY, Miller K, Applebaum A, et al. Clinical Trial Participation: A Qualitative Study of Adolescents and Younger Adults Recently Diagnosed with Cancer. *J Adolesc Young Adult Oncol*. 2023 Jun 1;12(3):303–13.
30. Bahrami M, Namnabati M, Mokarian F, Oujian P, Arbon P. Information-sharing challenges between adolescents with cancer, their parents and health care providers: a qualitative study. *Supportive Care in Cancer* [Internet]. 2017;25(5):1587–96. Available from: <https://search.ebscohost.com/login.aspx?direct=true&AuthType=athens&db=cin20&AN=122279626&site=ehost-live>
31. Darabos K, Berger AJ, Barakat LP, Schwartz LA. Cancer-Related Decision-Making Among Adolescents, Young Adults, Caregivers, and Oncology Providers. *Qual Health Res*. 2021 Nov 1;31(13):2355–63.
32. Davies J, Kelly D, Hannigan B. “Life then”, “life interrupted”, “life reclaimed”: The fluctuation of agency in teenagers and young adults with cancer. *Eur J Oncol Nurs*. 2018;36(100885136):48–55.
33. Fern LA, Taylor RM, Whelan J, Pearce S, Grew T, Brooman K, et al. The Art of Age-Appropriate Care. *Cancer Nurs* [Internet]. 2013;36(5):E27–38. Available from: <https://search.ebscohost.com/login.aspx?direct=true&AuthType=athens&db=cin20&AN=110243702&site=ehost-live>
34. Fourneret E. Breaking Bad News about Cancer to Adolescents and Young Adults: The French Experience. *J Law Med* [Internet]. 2018 [cited 2021 Nov 22];25(2):530–7. Available from: <https://pubmed.ncbi.nlm.nih.gov/29978652/>

- 1  
2  
3 35. Frederick NN, Mack JW. Adolescent patient involvement in discussions about  
4 relapsed or refractory cancer with oncology clinicians. *Pediatr Blood Cancer*  
5 [Internet]. 2018;65(4):1. Available from:  
6 [https://search.ebscohost.com/login.aspx?direct=true&AuthType=athens&db=cin20&](https://search.ebscohost.com/login.aspx?direct=true&AuthType=athens&db=cin20&AN=128132562&site=ehost-live)  
7 [AN=128132562&site=ehost-live](https://search.ebscohost.com/login.aspx?direct=true&AuthType=athens&db=cin20&AN=128132562&site=ehost-live)
- 8  
9 36. Hong MK, Wilcox L, Machado D, Olson TA, Simoneaux SF. Care Partnerships: Toward  
10 Technology to Support Teens' Participation in Their Health Care. *Proc SIGCHI Conf*  
11 *Hum Factor Comput Syst* [Internet]. 2016 May 7 [cited 2018 Jun 2];2016:5337–49.  
12 Available from: <http://www.ncbi.nlm.nih.gov/pubmed/28164178>
- 13 37. Mack JW, Fasciano KM, Block SD. Adolescent and Young Adult Cancer Patients'  
14 Experiences With Treatment Decision-making. *Pediatrics*. 2019;143(5).
- 15 38. Patterson P, Millar B, Desille N, McDonald F. The Unmet Needs of Emerging Adults  
16 With a Cancer Diagnosis A Qualitative Study. *Cancer Nurs*. 2012;35(3):E32–40.
- 17 39. Pennant S, Lee SC, Holm S, Triplett KN, Howe-Martin L, Campbell R, et al. The Role of  
18 Social Support in Adolescent/Young Adults Coping with Cancer Treatment. *Children*  
19 [Internet]. 2020;7(1):1–25. Available from:  
20 [https://search.ebscohost.com/login.aspx?direct=true&AuthType=athens&db=cin20&](https://search.ebscohost.com/login.aspx?direct=true&AuthType=athens&db=cin20&AN=142468088&site=ehost-live)  
21 [AN=142468088&site=ehost-live](https://search.ebscohost.com/login.aspx?direct=true&AuthType=athens&db=cin20&AN=142468088&site=ehost-live)
- 22 40. Pyke-Grimm KA, Franck LS, Halpern-Felsher B, Goldsby RE, Rehm RS. 3 Dimensions of  
23 Treatment Decision Making in Adolescents and Young Adults With Cancer. *Cancer*  
24 *Nurs* [Internet]. 2020 Nov;43(6):436–45. Available from:  
25 [https://search.ebscohost.com/login.aspx?direct=true&AuthType=athens&db=cin20&](https://search.ebscohost.com/login.aspx?direct=true&AuthType=athens&db=cin20&AN=146822019&site=ehost-live)  
26 [AN=146822019&site=ehost-live](https://search.ebscohost.com/login.aspx?direct=true&AuthType=athens&db=cin20&AN=146822019&site=ehost-live)
- 27 41. Pyke-Grimm KA, Franck LS, Halpern-Felsher B, Goldsby RE, Rehm RS. Day-to-Day  
28 Decision Making by Adolescents and Young Adults with Cancer. *Journal of Pediatric*  
29 *Hematology/Oncology Nursing* [Internet]. 2022;39(5):290–303. Available from:  
30 [https://ovidsp.ovid.com/athens/ovidweb.cgi?T=JS&CSC=Y&NEWS=N&PAGE=fulltext&](https://ovidsp.ovid.com/athens/ovidweb.cgi?T=JS&CSC=Y&NEWS=N&PAGE=fulltext&D=medl&AN=35538622)  
31 [D=medl&AN=35538622](https://ovidsp.ovid.com/athens/ovidweb.cgi?T=JS&CSC=Y&NEWS=N&PAGE=fulltext&D=medl&AN=35538622) <https://cambridge->  
32 [primo.hosted.exlibrisgroup.com/openurl/44CAM/44CAM\\_services\\_page?sid=OVID:m](https://cambridge-)  
33 [edline&id=pmid:35538622&id=doi:10.1177%2F27527530211068718&issn=](https://cambridge-)  
34 [edline&id=pmid:35538622&id=doi:10.1177%2F27527530211068718&issn=](https://cambridge-)
- 35 42. Zarnegar S, Gosiengfiao Y, Rademaker A, Casey R, Albritton KH. Recall of Fertility  
36 Discussion by Adolescent Female Cancer Patients: A Survey-Based Pilot Study. *J*  
37 *Adolesc Young Adult Oncol* [Internet]. 2018 Apr;7(2):249–53. Available from:  
38 <http://www.liebertpub.com/products/product.aspx?pid=387>
- 39 43. Viola A, Taggi-Pinto A, Sahler OJZ, Alderfer MA, Devine KA, Ed M, et al. Problem-  
40 solving skills, parent-adolescent communication, dyadic functioning, and distress  
41 among adolescents with cancer. *Pediatr Blood Cancer*. 2018;65(5).
- 42 44. Weaver MS, Baker JN, Gibson D V, Gattuso JS, Sykes AD, Hinds PS. Adolescents'  
43 preferences for treatment decisional involvement during their cancer. *Cancer*  
44 [Internet]. 2015;121(24):4416–24. Available from:  
45 [http://onlinelibrary.wiley.com/journal/10.1002/\(ISSN\)1097-0142](http://onlinelibrary.wiley.com/journal/10.1002/(ISSN)1097-0142)
- 46 45. Sisk BA, Keenan M, Kaye EC, Baker JN, Mack JW, DuBois JM. Co-management of  
47 communication and care in adolescent and young adult oncology. *Pediatr Blood*  
48 *Cancer* [Internet]. 2022;69(10):e29813. Available from:  
49 [https://ovidsp.ovid.com/athens/ovidweb.cgi?T=JS&CSC=Y&NEWS=N&PAGE=fulltext&](https://ovidsp.ovid.com/athens/ovidweb.cgi?T=JS&CSC=Y&NEWS=N&PAGE=fulltext&D=mex&AN=35719025)  
50 [D=mex&AN=35719025](https://ovidsp.ovid.com/athens/ovidweb.cgi?T=JS&CSC=Y&NEWS=N&PAGE=fulltext&D=mex&AN=35719025) <https://cambridge->  
51  
52  
53  
54  
55  
56  
57  
58  
59  
60

- 1  
2  
3  
4  
5  
6  
7  
8  
9  
10  
11  
12  
13  
14  
15  
16  
17  
18  
19  
20  
21  
22  
23  
24  
25  
26  
27  
28  
29  
30  
31  
32  
33  
34  
35  
36  
37  
38  
39  
40  
41  
42  
43  
44  
45  
46  
47  
48  
49  
50  
51  
52  
53  
54  
55  
56  
57  
58  
59  
60
- primo.hosted.exlibrisgroup.com/openurl/44CAM/44CAM\_services\_page?sid=OVID:medline&id=pmid:35719025&id=doi:10.1002%2Fpbc.29813&issn=1545-500
46. Sisk BA, Keenan M, Schulz GL, Kaye E, Baker JN, Mack JW, et al. Interdependent functions of communication with adolescents and young adults in oncology. *Pediatr Blood Cancer* [Internet]. 2022; Available from: [http://onlinelibrary.wiley.com/journal/10.1002/\(ISSN\)1545-5017](http://onlinelibrary.wiley.com/journal/10.1002/(ISSN)1545-5017)
47. Barlevy D, Wangmo T, Ash S, Elger BS, Ravitsky V. Oncofertility decision making: Findings from Israeli adolescents and parents. *J Adolesc Young Adult Oncol* [Internet]. 2019;8(1):74–83. Available from: <https://www.proquest.com/scholarly-journals/oncofertility-decision-making-findings-israeli/docview/2426222863/se-2?accountid=47868>
48. Sawyer SM, McNeil R, Thompson K, Orme LM, McCarthy MAOSSM; O <http://orcid.org/0000-0002-9095-358X>, Sawyer SM, et al. Developmentally appropriate care for adolescents and young adults with cancer: how well is Australia doing? *Supportive Care in Cancer* [Internet]. 2019;27(5):1783–92. Available from: <http://link.springer.de/link/service/journals/00520/index.htm>
49. Ellis SJ, Wakefield CE, McLoone JK, Robertson EG, Cohn RJ. Fertility concerns among child and adolescent cancer survivors and their parents: A qualitative analysis. *J Psychosoc Oncol*. 2016;34(5):347–62.
50. Ananth P, Mun S, Reffat N, Li R, Sedghi T, Avery M, et al. A Stakeholder-Driven Qualitative Study to Define High Quality End-of-Life Care for Children With Cancer. *J Pain Symptom Manage* [Internet]. 2021;62(3):492–502. Available from: <https://ovidsp.ovid.com/athens/ovidweb.cgi?T=JS&CSC=Y&NEWS=N&PAGE=fulltext&D=med19&AN=33556497> [https://cambridge-primo.hosted.exlibrisgroup.com/openurl/44CAM/44CAM\\_services\\_page?sid=OVID:medline&id=pmid:33556497&id=doi:10.1016%2Fj.jpainsymman.2021.01](https://cambridge-primo.hosted.exlibrisgroup.com/openurl/44CAM/44CAM_services_page?sid=OVID:medline&id=pmid:33556497&id=doi:10.1016%2Fj.jpainsymman.2021.01).
51. Cicero-Oneto CE, Valdez-Martinez E, Bedolla M. Decision-making on therapeutic futility in Mexican adolescents with cancer: a qualitative study. *BMC Med Ethics* [Internet]. 2017;18:74. Available from: <https://search.ebscohost.com/login.aspx?direct=true&AuthType=athens&db=cin20&AN=127010047&site=ehost-live>
52. Friebert S, Grosseohme DH, Baker JN, Needle J, Thompkins JD, Cheng YI, et al. Congruence Gaps Between Adolescents With Cancer and Their Families Regarding Values, Goals, and Beliefs About End-of-Life Care. *JAMA Netw Open* [Internet]. 2020 May 19;e205424–e205424. Available from: <https://search.ebscohost.com/login.aspx?direct=true&AuthType=athens&db=cin20&AN=143389091&site=ehost-live>
53. Jacobs S, Perez J, Cheng YI, Sill A, Wang J, Lyon ME. Adolescent end of life preferences and congruence with their parents' preferences: Results of a survey of adolescents with cancer. *Pediatr Blood Cancer* [Internet]. 2015;62(4):710–4. Available from: <https://search.ebscohost.com/login.aspx?direct=true&AuthType=athens&db=cin20&AN=109777063&site=ehost-live>
54. Lyon ME, Jacobs S, Briggs L, Cheng YI, Wang J. Family-centered advance care planning for teens with cancer. *JAMA Pediatr*. 2013;167(5):460–7.
55. Wu LM, Chiou SS, Lin PC, Liao YM, Su HL. Decisional conflicts, anxiety, and perceptions of shared decision-making in cancer treatment trajectory among

- 1  
2  
3 adolescents with cancer: A longitudinal study. *Journal of Nursing Scholarship*.  
4 2022;54(5):589–97.
56. Son H, Miller LE. Family Communication About Cancer in Korea: A Dyadic Analysis of  
7 Parent-Adolescent Conversation. *Glob Qual Nurs Res*. 2023 Jan 1;10(5).
57. Glackin A, Marino JL, Peate M, McNeil R, Orme LM, McCarthy MC, et al. Experiences  
9 of Oncofertility Decision-Making and Care in a National Sample of Adolescent and  
10 Young Adult Cancer Patients and Parents. *J Adolesc Young Adult Oncol*. 2023;
58. Mack JW, Fasciano KM, Block SD. Adolescent and Young Adult Cancer Patients’  
12 Experiences With Treatment Decision-making. *Pediatrics*. 2019;143(5).
59. Martins A, Alvarez-Galvez J, Fern LA, Vindrola-Padros C, Barber JA, Gibson F, et al. The  
14 BRIGHTLIGHT National Survey of the Impact of Specialist Teenage and Young Adult  
15 Cancer Care on Caregivers’ Information and Support Needs. *Cancer Nurs*.  
16 2021;44(3):235–43.
60. Dalton JM. Development and testing of the theory of collaborative decision-making in  
18 nursing practice for triads. *J Adv Nurs*. 2003;41(1):22–33.
61. Grinyer A. Young people living with cancer: implications for policy and practice. Open  
20 University Press; 2007. 182 p.
62. Moules NJ, Laing CM, Estefan A, Schulte F, Guilcher GMT. “Family Is Who They Say  
22 They Are”(a): Examining the Effects of Cancer on the Romantic Partners of  
23 Adolescents and Young Adults. *J Fam Nurs*. 2018;24(3):374–404.
63. Silva M, Barretta F, Luksch R, Terenziani M, Casanova M, Spreafico F, et al.  
25 Adolescents with cancer on privacy: Fact-finding survey on the need for  
26 confidentiality and space. *Tumori*. 2021 Oct 1;107(5):452–7.
64. KM B, Smith A, Schmidt S, TH K, Zebrack B, CF L, et al. Positive and negative  
28 psychosocial impact of being diagnosed with cancer as an adolescent or young adult.  
29 *Cancer* (0008543X) [Internet]. 2012 Oct 15;118(20):5155–62. Available from:  
30 [https://search.ebscohost.com/login.aspx?direct=true&AuthType=athens&db=cin20&  
31 AN=104372613&site=ehost-live](https://search.ebscohost.com/login.aspx?direct=true&AuthType=athens&db=cin20&AN=104372613&site=ehost-live)
65. Pyke-Grimm KA, Franck LS, Patterson Kelly K, Halpern-Felsher B, Goldsby RE, Kleiman  
33 A, et al. Treatment Decision-Making Involvement in Adolescents and Young Adults  
34 With Cancer. *Oncol Nurs Forum* [Internet]. 2019;46(1):E22–37. Available from:  
35 [https://search.ebscohost.com/login.aspx?direct=true&AuthType=athens&db=cin20&  
36 AN=133553348&site=ehost-live](https://search.ebscohost.com/login.aspx?direct=true&AuthType=athens&db=cin20&AN=133553348&site=ehost-live)
66. Davies J. The experience and role of partners in helping to meet the support needs of  
38 adolescents and young adults with cancer. *Journal of Advanced Nursing* (John Wiley &  
39 Sons, Inc) [Internet]. 2019 May;75(5):1119–25. Available from:  
40 [https://search.ebscohost.com/login.aspx?direct=true&AuthType=athens&db=cin20&  
41 AN=135934208&site=ehost-live](https://search.ebscohost.com/login.aspx?direct=true&AuthType=athens&db=cin20&AN=135934208&site=ehost-live)
67. Iannarino NT. “It’s My Job Now, I Guess”: Biographical disruption and communication  
43 work in supporters of young adult cancer survivors. *Commun Monogr* [Internet].  
44 2018;85(4):491–514. Available from:  
45 <https://doi.org/10.1080/03637751.2018.1468916>
68. Coyne I, Amory A, Gibson F, Kiernan G. Information-sharing between healthcare  
47 professionals, parents and children with cancer: More than a matter of information  
48 exchange. *Eur J Cancer Care (Engl)*. 2016;25(1):141–56.
- 59  
60

- 1
- 2
- 3
- 4 69. de Vries MC, Wit JM, Engberts DP, Kaspers GJL, van Leeuwen E. Pediatric Oncologists' Attitudes Towards Involving Adolescents in Decision-Making Concerning Research Participation. *Pediatr Blood Cancer*. 2010;55(1):123–8.
- 5
- 6
- 7 70. Frederick NN, Bingen K, Bober SL, Cherven B, Xu X, Quinn GP, et al. Pediatric oncology clinician communication about sexual health with adolescents and young adults: A report from the children's oncology group. *Cancer Med [Internet]*. 2021;10(15):5110–9. Available from: <https://ovidsp.ovid.com/athens/ovidweb.cgi?T=JS&CSC=Y&NEWS=N&PAGE=fulltext&D=med20&AN=34128352> [https://cambridge-primo.hosted.exlibrisgroup.com/openurl/44CAM/44CAM\\_services\\_page?sid=OVID:medline&id=pmid:34128352&id=doi:10.1002%2Fcam4.4077&issn=2045-76](https://cambridge-primo.hosted.exlibrisgroup.com/openurl/44CAM/44CAM_services_page?sid=OVID:medline&id=pmid:34128352&id=doi:10.1002%2Fcam4.4077&issn=2045-76)
- 8
- 9
- 10
- 11
- 12
- 13
- 14
- 15
- 16
- 17 71. General Medical Council. Guidance for All Doctors. 0-18 Years: Guidance for All Doctors [Internet]. 2018;11. Available from: <https://www.gmc-uk.org/ethical-guidance/ethical-guidance-for-doctors/0-18-years/making-decisions#paragraph-29>
- 18
- 19
- 20
- 21 72. British Medical Association. Children and young people toolkit A toolkit for doctors. *BMA.org.uk [Internet]*. 2021; Available from: <https://www.bma.org.uk>
- 22
- 23 73. Gillick T. Gillick competence What is Gillick Here ' s what you need to know about capacity and The Gillick case. 2022;
- 24
- 25 74. Joffe S, Fernandez C V., Pentz RD, Ungar DR, Mathew NA, Turner CW, et al. Involving children with cancer in decision-making about research participation. *Journal of Pediatrics*. 2006;149(6).
- 26
- 27
- 28
- 29 75. Mårtenson EK, Fägerskiöld AM. A review of children's decision-making competence in health care. *J Clin Nurs*. 2008;17(23):3131–41.
- 30
- 31 76. Department for Constitutional Affairs. Mental Capacity Act 2005: Code of Practice. *Mental Capacity Act 2005: Code of Practice*. 2007;1–301.
- 32
- 33 77. Lea S, Gibson F, Taylor RM. Holistic Competence": How Is it Developed, Shared, and Shaped by Health Care Professionals Caring for Adolescents and Young Adults with Cancer? *J Adolesc Young Adult Oncol*. 2021;10(5):503–11.
- 34
- 35
- 36
- 37 78. Essig S, Steiner C, Kuehni CE, Weber H, Kiss A. Improving Communication in Adolescent Cancer Care: A Multiperspective Study. *Pediatr Blood Cancer*. 2016;63(8):1423–30.
- 38
- 39
- 40
- 41 79. Essig S, Steiner C, Kühne T, Kremens B, Langewitz W, Kiss A. Communication Skills Training for Professionals Working with Adolescent Patients with Cancer Based on Participants' Needs: A Pilot. <https://home.liebertpub.com/jayao>. 2019 Jun 4;8(3):354–62.
- 42
- 43
- 44
- 45
- 46 80. Coad J, Smith J, Pontin D, Gibson F. Consult, Negotiate, and Involve: Evaluation of an Advanced Communication Skills Program for Health Care Professionals. *Journal of Pediatric Oncology Nursing*. 2018 Jul 1;35(4):296–307.
- 47
- 48
- 49
- 50 81. Ruhe KM, Badarau DO, Brazzola P, Hengartner H, Elger BS, Wangmo T, et al. Participation in pediatric oncology: views of child and adolescent patients. *Psychooncology*. 2016;25(9):1036–42.
- 51
- 52
- 53 82. Blackmore A, Kasfiki EV, Purva M. Simulation-based education to improve communication skills: A systematic review and identification of current best practice. *BMJ Simul Technol Enhanc Learn*. 2018;4(4):159–64.
- 54
- 55
- 56 83. Mahoney P, Macfarlane S, Ajjawi R. A qualitative synthesis of video feedback in higher education. *Teaching in Higher Education [Internet]*. 2019;24(2):157–79. Available from: <https://doi.org/10.1080/13562517.2018.1471457>
- 57
- 58
- 59
- 60

- 1
- 2
- 3
- 4 84. Smith S, Mooney S, Cable M, Taylor RM. THE BLUEPRINT OF CARE for teenagers and
- 5 young adults with cancer Second edition. 2016; Available from:
- 6 [https://www.teenagecancertrust.org/sites/default/files/BlueprintOfCare\\_2ndEdition.](https://www.teenagecancertrust.org/sites/default/files/BlueprintOfCare_2ndEdition.pdf)
- 7 pdf
- 8
- 9
- 10
- 11
- 12
- 13
- 14
- 15
- 16
- 17
- 18
- 19
- 20
- 21
- 22
- 23
- 24
- 25
- 26
- 27
- 28
- 29
- 30
- 31
- 32
- 33
- 34
- 35
- 36
- 37
- 38
- 39
- 40
- 41
- 42
- 43
- 44
- 45
- 46
- 47
- 48
- 49
- 50
- 51
- 52
- 53
- 54
- 55
- 56
- 57
- 58
- 59
- 60

For peer review only

1  
2  
3  
4  
5  
6  
7  
8  
9  
10  
11  
12  
13  
14  
15  
16  
17  
18  
19  
20  
21  
22  
23  
24  
25  
26  
27  
28  
29  
30  
31  
32  
33  
34  
35  
36  
37  
38  
39  
40  
41  
42  
43  
44  
45  
46  
47  
48  
49  
50  
51  
52  
53  
54  
55  
56

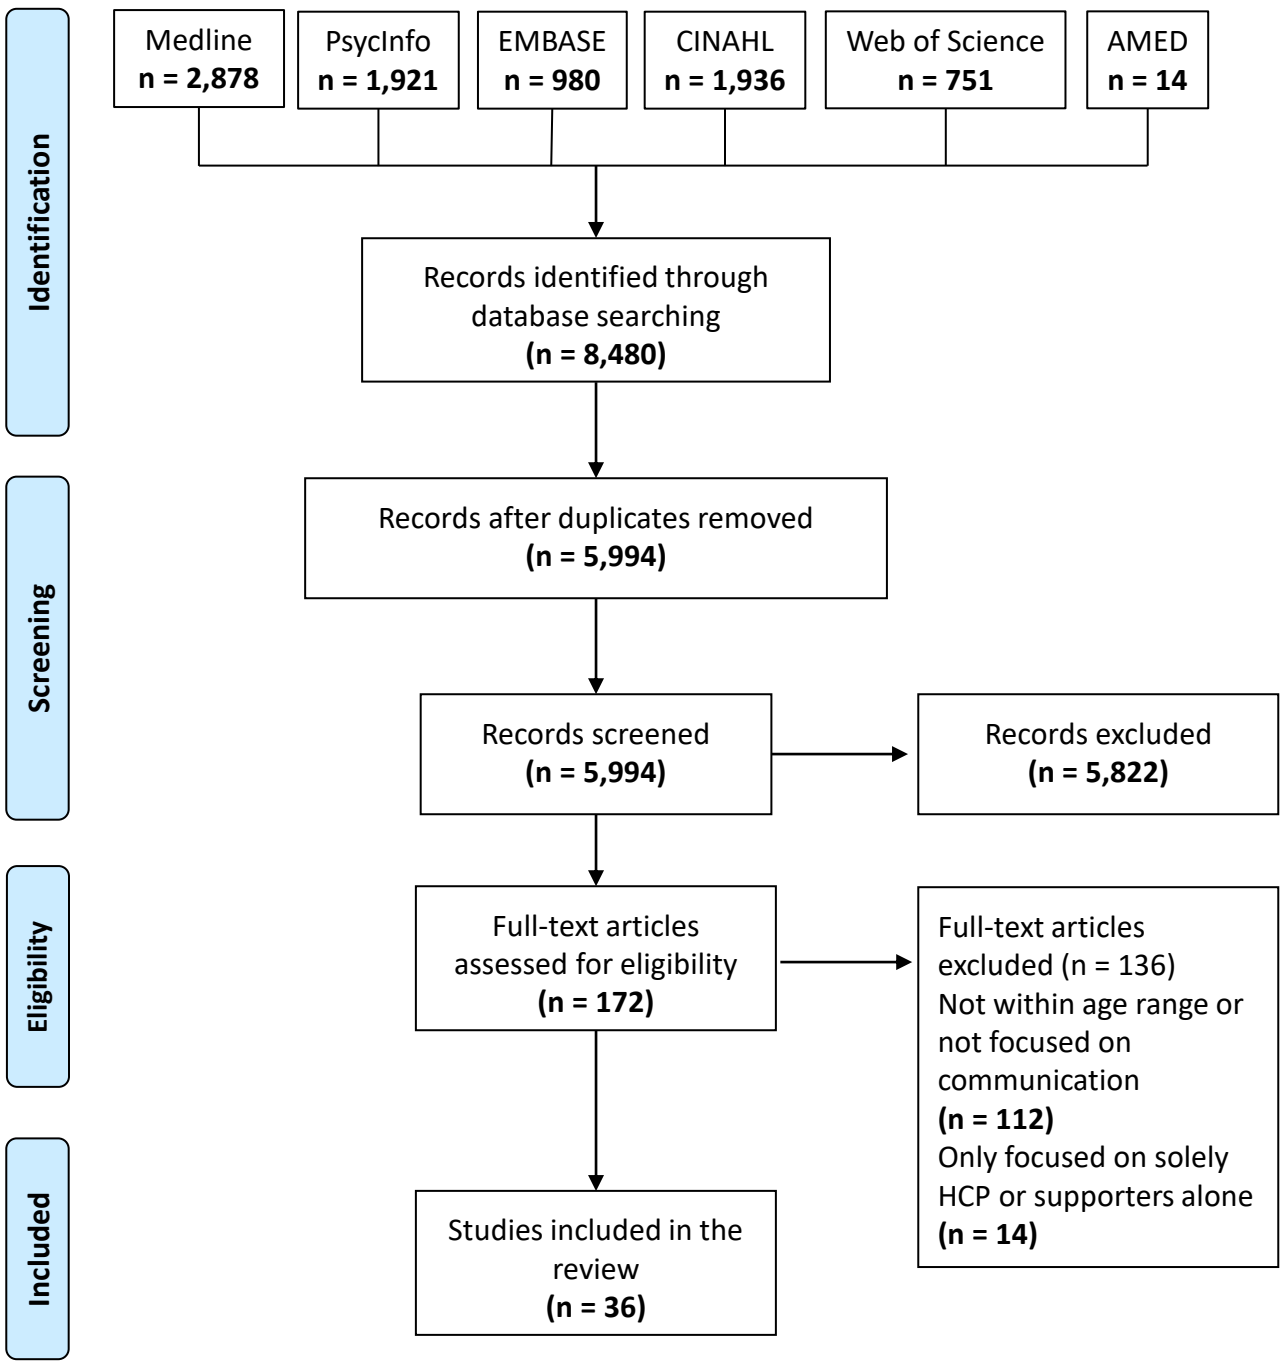



Table 2. Summary of Articles

| <i>First author</i><br>(year) | Title                                                                                                                              | Setting               | Study Type -<br><u>analysis method</u><br><i>Data collection</i>                                                      | Focus                                                                                      | Participant Characteristics                                                                                                                                | Key findings                                                                                                                                                                                                                                                                                                                                                                                                                                                                                                                                                 | WoE Score |
|-------------------------------|------------------------------------------------------------------------------------------------------------------------------------|-----------------------|-----------------------------------------------------------------------------------------------------------------------|--------------------------------------------------------------------------------------------|------------------------------------------------------------------------------------------------------------------------------------------------------------|--------------------------------------------------------------------------------------------------------------------------------------------------------------------------------------------------------------------------------------------------------------------------------------------------------------------------------------------------------------------------------------------------------------------------------------------------------------------------------------------------------------------------------------------------------------|-----------|
| Ananth (2021)                 | A Stakeholder-Driven Qualitative Study to Define High Quality End-Of-Life Care for Children with Cancer                            | USA<br>Multicentre    | Qualitative -<br><u>thematic analysis</u><br><br><i>Semi-structured interviews and focus groups.</i>                  | To explore end of life care (EOLC) priorities for children with cancer and their families. | <u>54 participants:</u><br><b>10 AYACs (age range: 17-23 years)</b><br>25 parents (including 12 bereaved parents)<br>19 healthcare professionals           | Important to have direct communication with the child or young person regarding decision-making.<br>Interdisciplinary care with integrated teams is vital for high quality end of life care. Continuity of healthcare professionals was positive.<br>AYACs would prefer to die at home but family and healthcare professionals may be hesitant.                                                                                                                                                                                                              | Medium    |
| Bahrami (2017)                | Information Sharing Challenges Between Adolescents with Cancer, their Parents and Health Care Providers: A Qualitative Study       | Iran<br>Single centre | Qualitative descriptive-exploratory study - <u>grounded theory analysis</u><br><br><i>Semi-structured interviews.</i> | Information sharing between AYACs, parents and health professionals.                       | <u>33 participants:</u><br><b>12 AYACs (age range at interview: 15-20 years, within 1 year of diagnosis)</b><br>6 supporters<br>6 healthcare professionals | AYACs feel they are excluded from information-sharing sessions between parents and healthcare professionals. This leads to disaffiliation, confusion and AYACs seek information from ‘inferior’ sources.<br>Parents were often the first receivers of information allowing them to act as gatekeepers controlling information to flow to AYACs. Parents may want to shield AYACs from bad news.<br>Trust and honesty are the foundations of effective communication between AYACs and healthcare professionals. AYACs reacted negatively towards dishonesty. | Medium    |
| Barakat (2014)                | A Qualitative Study of Phase III Cancer Clinical Trial Enrollment Decision Making Perspectives from AYAC, Caregivers and Providers | USA<br>Single centre  | Qualitative -<br><u>thematic analysis</u><br><br><i>Semi-structured interviews.</i>                                   | Clinical trial enrollment.                                                                 | <u>40 participants:</u><br><b>13 AYACs (age range: 15-21 years)</b><br>16 supporters<br>11 healthcare professionals                                        | Four patterns of decision-making patterns identified:<br>1. AYAC abdicates to caregiver,<br>2. Caregiver based and AYAC approved,<br>3. Collaborative,<br>4. AYAC in charge of decision-making.<br>Caregivers perceived AYAC to be in charge of decision making most of the time whereas the AYACs felt that “AYAC abdicates to carer” was the most common form of decision making.<br>Distress and poor health limited AYAC involvement in the decision.<br>Developmental and emotional maturity facilitated involvement.                                   | High      |

|    |                     |                                                                                                 |                         |                                                                             |                                                                                                                |                                                                                                                               |                                                                                                                                                                                                                                                                                                                                                                                                                                                                                                                                                                                                                                                                                     |        |
|----|---------------------|-------------------------------------------------------------------------------------------------|-------------------------|-----------------------------------------------------------------------------|----------------------------------------------------------------------------------------------------------------|-------------------------------------------------------------------------------------------------------------------------------|-------------------------------------------------------------------------------------------------------------------------------------------------------------------------------------------------------------------------------------------------------------------------------------------------------------------------------------------------------------------------------------------------------------------------------------------------------------------------------------------------------------------------------------------------------------------------------------------------------------------------------------------------------------------------------------|--------|
| 1  | Barlevy             | Oncofertility decision making: findings from Israeli adolescents and parents                    | Israel<br>Single centre | Qualitative- thematic analysis<br><i>semi-structured interviews</i>         | To understand adolescent oncofertility decision making in Israel, from perspectives of parents and adolescents | <u>35 participants</u><br><b>16 AYACs (age range 12-16 years)</b><br>19 parents                                               | As in other cultural contexts, Israeli adolescents and parents demonstrate multifaceted decision making with respect to oncofertility. A significant finding from this study suggests that health professional shy from discussing posthumous planning of cryopreserved materials with adolescent cancer patients and their parents. 5 out of 16 AYAs felt that the decision was not theirs and that it was instead the parents' or the physicians' to make. Some parents felt that the decision was made by the clinician - explicit or implicit recommendations from the clinician strongly influence decision making. No decisional regret expressed by any members of the dyad. | Medium |
| 16 | Cicero-Oneto (2017) | Decision-making on therapeutic futility in Mexican adolescents with cancer: a qualitative study | Mexico<br>Multicentre   | Qualitative - <u>thematic analysis</u><br><i>Semi-structured interviews</i> | Decision making on therapeutic futility                                                                        | <u>32 Participants</u><br>13 paediatric oncologists<br>13 parents or primary carers<br><b>6 AYACs (age range 13-18 years)</b> | Four themes were identified<br>1. flow of information to inform decision making<br>2. disclosure of prognosis<br>3. decision maker and stakeholder involved in decision making<br>4. barriers and facilitators to decision making<br>Differing values and agendas. The parents valued messages to “life the spirits” whereas the AYACs values honesty from the healthcare professionals Gatekeeping of information.<br>Theme of “deference to authority”                                                                                                                                                                                                                            | Medium |

For peer review only

|                                                                                                                   |                |                                                                                                                        |                            |                                                                                                        |                                                                                           |                                                                                                                                                                                                                                                             |                                                                                                                                                                                                                                                                                                                                                                                                                                                                                                                                                                                                                                                                                                                                                               |        |
|-------------------------------------------------------------------------------------------------------------------|----------------|------------------------------------------------------------------------------------------------------------------------|----------------------------|--------------------------------------------------------------------------------------------------------|-------------------------------------------------------------------------------------------|-------------------------------------------------------------------------------------------------------------------------------------------------------------------------------------------------------------------------------------------------------------|---------------------------------------------------------------------------------------------------------------------------------------------------------------------------------------------------------------------------------------------------------------------------------------------------------------------------------------------------------------------------------------------------------------------------------------------------------------------------------------------------------------------------------------------------------------------------------------------------------------------------------------------------------------------------------------------------------------------------------------------------------------|--------|
| 1<br>2<br>3<br>4<br>5<br>6<br>7<br>8<br>9<br>10<br>11<br>12<br>13<br>14<br>15<br>16<br>17<br>18<br>19<br>20<br>21 | Darabos (2021) | Cancer Related Decision Making Among AYAC, Care Givers and Oncology Providers                                          | USA<br>Single centre       | Qualitative – <u>content analysis with hypothesis coding</u><br><br><i>Semi-structured interviews.</i> | Decision-making and triadic communication                                                 | <u>30 Participants:</u><br><b>11 AYACs (age range: 15-24 years)</b><br>11 supporters<br>8 healthcare professionals                                                                                                                                          | Four decision-making patterns were identified:<br>1. AYAC driven,<br>2. Collaborative,<br>3. Deferral to parents,<br>4. Provider-based, AYA/Caregiver-approved.<br>Collaborative decision-making and AYAC-driven decisions were most commonly described. There was recognition that some decision-making was day/context dependent. AYACs were more likely to drive decisions regarding supportive care than treatment related decisions. AYACs and caregivers explained how cognitive and emotional processes influenced cancer related decisions. Emotional coping was more common than problem-based coping. Direct and honest communication contributes to a stronger relationship. Individuality is key along with flexibility. Time alone is important. | High   |
| 22<br>23<br>24<br>25<br>26<br>27<br>28<br>29<br>30<br>31                                                          | Davies (2019)  | ‘Life then’, ‘life interrupted’, ‘life reclaimed’: the fluctuation of agency in teenagers and young adults with cancer | UK<br>single centre        | qualitative - thematic analysis<br><br><i>case studies - multiple interviews</i>                       | Fluctuation of agency across time and between cases                                       | <u>22 participants</u><br><b>5 AYACs (16-24 years)</b><br><b>5 parents carers</b> (2 fathers, 3 mothers, 1 couple),<br>5 healthcare professionals (4 nurses and 1 oncology consultant)<br>5 other supporters (1 boyfriend, 1 girlfriend, 1 aunt, 2 friends) | Agency fluctuates over time within cases and between cases. Agency can fluctuate between personal, proxy and collective perspectives. Personal agency is high prior to diagnosis, decreases after diagnosis and is reclaimed after treatment.                                                                                                                                                                                                                                                                                                                                                                                                                                                                                                                 | Medium |
| 32<br>33<br>34<br>35<br>36<br>37<br>38<br>39                                                                      | Ellis (2016)   | Fertility concerns among child and adolescent survivors and parents: a qualitative study                               | Australia<br>single centre | Qualitative semi-structured telephone interviews                                                       | Fertility related themes with AYACs who are recently off treatment and with their parents | <u>97 participants from 45 families</u><br><b>19 AYACs (age range 7-17 at diagnosis, mean age 13.3)</b><br>44 mothers and 34 fathers                                                                                                                        | Both parents and AYACs are concerned about the potential impacts on fertility of treatment. Poor doctor-patient communication was reported and conversations about fertility were frequently interrupted to discuss illness and treatment. These fertility discussions were not then continues once the AYAC was off treatment                                                                                                                                                                                                                                                                                                                                                                                                                                | Medium |

For peer review only

|                                                                                                                                                                      |                 |                                                                                            |                                                                               |                                                                                                                                                     |                                                                                           |                                                                                                                      |                                                                                                                                                                                                                                                                                                                                                                                                                                                                                                                                                                                                                                                                                                                                          |        |
|----------------------------------------------------------------------------------------------------------------------------------------------------------------------|-----------------|--------------------------------------------------------------------------------------------|-------------------------------------------------------------------------------|-----------------------------------------------------------------------------------------------------------------------------------------------------|-------------------------------------------------------------------------------------------|----------------------------------------------------------------------------------------------------------------------|------------------------------------------------------------------------------------------------------------------------------------------------------------------------------------------------------------------------------------------------------------------------------------------------------------------------------------------------------------------------------------------------------------------------------------------------------------------------------------------------------------------------------------------------------------------------------------------------------------------------------------------------------------------------------------------------------------------------------------------|--------|
| 1<br>2<br>3<br>4<br>5<br>6<br>7<br>8<br>9<br>10<br>11<br>12<br>13<br>14<br>15<br>16<br>17<br>18<br>19                                                                | Essig<br>(2016) | Improving<br>Communication in<br>Adolescent Cancer<br>Care: A<br>Multiperspective<br>Study | Germany,<br>Austria,<br>Switzerland<br><br>Number of<br>centres not<br>stated | Qualitative –<br><u>inductive</u><br><u>thematic analysis</u><br><br><i>Focus groups.</i>                                                           | Explore effective<br>communication<br>with AYACs for<br>communication<br>skills training. | <u>54 participants:</u><br><b>16 AYACs (age range: 13-<br/>19 years)</b><br>8 parents<br>30 healthcare professionals | Decision-making can cause conflict when adolescents are cognitively mature but legally lack the ability to make decisions.<br>AYACs feel a loss of autonomy.<br>Age-appropriate environments are important.<br>Effective communication differs depending on the type of professional (i.e., doctor vs nurse)<br>Adolescents negatively affect communication when:<br>1. They are indifferent.<br>2. Their priorities conflict with treatment<br>3. They conflict with parents.<br>Healthcare professionals negatively affect communication when:<br>1. They don't treat the adolescent in an age-appropriate way.<br>2. They don't take the adolescent seriously.<br>3. They give too much information or withhold important information | Medium |
| 20<br>21<br>22<br>23<br>24<br>25<br>26<br>27<br>28<br>29<br>30<br>31<br>32<br>33<br>34<br>35<br>36<br>37<br>38<br>39<br>40<br>41<br>42<br>43<br>44<br>45<br>46<br>47 | Fern (2013)     | The Art of Age-<br>Appropriate Care                                                        | UK<br>Number of<br>centres not<br>stated                                      | Qualitative –<br><u>thematic analysis</u><br><br><i>Peer-to-peer<br/>interviews, field<br/>notes and spider<br/>diagrams from<br/>focus groups.</i> | Review a<br>conceptual model<br>of AYACs'<br>cancer care<br>experiences.                  | <u>11 participants:</u><br><b>11 AYACs (age range: 13-<br/>25 years)</b>                                             | Young people must be kept at the centre of interactions in recognition of their stated needs:<br>1. Engagement.<br>2. Individually tailored information.<br>3. Support unproxied by parents/family.<br>AYACs did not want information to be directed at parents but at them.<br>AYACs found it embarrassing when sensitive information was revealed in the presence of their parents.<br>Lack of continuity of healthcare professionals leads to AYACs dissatisfaction and irritation having to repeat their cancer story.                                                                                                                                                                                                               | Medium |

|                                                                                                             |                  |                                                                                                                               |                       |                                                                        |                                                                                                                          |                                                                                                                                                                                        |                                                                                                                                                                                                                                                                                                                                                                                                                                                                                                                                                                                                                                                                                                                                                                                                                                                                           |        |
|-------------------------------------------------------------------------------------------------------------|------------------|-------------------------------------------------------------------------------------------------------------------------------|-----------------------|------------------------------------------------------------------------|--------------------------------------------------------------------------------------------------------------------------|----------------------------------------------------------------------------------------------------------------------------------------------------------------------------------------|---------------------------------------------------------------------------------------------------------------------------------------------------------------------------------------------------------------------------------------------------------------------------------------------------------------------------------------------------------------------------------------------------------------------------------------------------------------------------------------------------------------------------------------------------------------------------------------------------------------------------------------------------------------------------------------------------------------------------------------------------------------------------------------------------------------------------------------------------------------------------|--------|
| 1<br>2<br>3<br>4<br>5<br>6<br>7<br>8<br>9<br>10<br>11<br>12<br>13<br>14<br>15<br>16<br>17<br>18<br>19<br>20 | Fourneret (2018) | Breaking bad news about cancer to adolescents and young adults: the french experience                                         | France<br>Multicentre | qualitative semi-structured interviews                                 | Explore the effectiveness and implementation of the French announcement protocol in 7 french paediatric oncology centres | <u>90 participants</u><br><b>27 AYACs (21 were 14-17 and 6 were 18-22)</b><br>30 parents (16 mothers, 5 fathers, 9 parents together at the appointment)<br>33 healthcare professionals | Parents and AYACs have different needs - both of which need to be accounted for when breaking bad news. Awkward and premature announcements were noted<br>The announcement consultation – young patients were never alone when informed of their disease; either with parents (n=31) (parents were informed before their child 10 out of 31 times - this was motivated by a compassionate goal of preparing the parents so they can better support the child when the bad news is broken) or close family member/sibling or boyfriend or girlfriend (n=2).<br>Some parents withheld info and some AYACs preferred parents not to know their diagnosis<br>Asymmetry in the triad discussed - but the key quality needed in the triad is mutual trust<br>HCP found parental presence helpful in the study. HCPs should show empathy (no neutrality) and attention to detail | Medium |
| 21<br>22<br>23<br>24<br>25<br>26<br>27<br>28<br>29<br>30<br>31                                              | Frederick (2018) | Adolescent Patient Involvement in Discussions About Relapsed or Refractory Cancer with Oncology Clinicians.                   | USA<br>Single centre  | Qualitative – content analysis<br><br><i>Audiotaped conversations.</i> | Breaking bad news of relapsed or refractory cancer.                                                                      | <u>75 participants:</u><br><b>11 AYACs (age range: 12.6-17.5 years)</b><br>44 supporters<br>20 healthcare professionals                                                                | Adolescent patients' involvement in conversations about relapsed or refractory cancer is limited. Adolescents were accompanied by one (27%) two (64%) or more than two (18%) family members in the discussion.<br>Adolescents spoke 3.5% of words compared to 66.9% clinicians and 30% parents.<br>No conversations included instances in which the clinicians' asked adolescents for their communication preferences or desired role in decision-making.                                                                                                                                                                                                                                                                                                                                                                                                                 | High   |
| 32<br>33<br>34<br>35<br>36<br>37<br>38<br>39<br>40<br>41                                                    | Friebert (2020)  | Congruence gaps between adolescents with cancer and their families regarding values, goals and beliefs about end-of-life care | USA<br>multicentre    | <i>Qualitative cross-sectional study</i>                               | End of life care                                                                                                         | <u>126 participants:</u><br><b>126 parent-AYAC dyads</b><br><b>AYACs (14-20 years, mean age 16.9)</b>                                                                                  | Young people wanted early information (86%) but only 39% families knew this. Families understanding of what was important to their adolescents when dealing with their own dying was excellent for wanting honest answers from their physician and understanding treatment choices but poor for dying a natural death and being off machines that extend life, if dying.<br>Parents do not know what AYACs want at the end of life                                                                                                                                                                                                                                                                                                                                                                                                                                        | Low    |

|                                                                                  |                |                                                                                                                                                                                        |                         |                                                                              |                                                                                                                                                        |                                                                                                                                                                                                   |                                                                                                                                                                                                                                                                                                                                                                                                                                                                                                                                                                                                              |        |
|----------------------------------------------------------------------------------|----------------|----------------------------------------------------------------------------------------------------------------------------------------------------------------------------------------|-------------------------|------------------------------------------------------------------------------|--------------------------------------------------------------------------------------------------------------------------------------------------------|---------------------------------------------------------------------------------------------------------------------------------------------------------------------------------------------------|--------------------------------------------------------------------------------------------------------------------------------------------------------------------------------------------------------------------------------------------------------------------------------------------------------------------------------------------------------------------------------------------------------------------------------------------------------------------------------------------------------------------------------------------------------------------------------------------------------------|--------|
| 1<br>2<br>3<br>4<br>5<br>6<br>7<br>8<br>9<br>10<br>11<br>12<br>13<br>14          | Glackin (2023) | Experiences of Oncofertility Decision-Making and Care in a National Sample of Adolescent and Young Adult Cancer Patients and Parents                                                   | Australasia multicentre | Qualitative – cross sectional survey. Reflexive thematic analysis            | Oncofertility decision making                                                                                                                          | <u>210 participants:</u><br><b>99 AYACs (age range 15-25 years)</b><br>111 parents<br>41 AYAC parent dyads from the same family                                                                   | Four themes were identified: emotional care needs; parent-AYA dynamics including autonomy and agency; decision-making considerations including values and practicalities; and reflections on oncofertility and follow-up. Both AYAC and parents placed importance on AYA autonomy in fertility decision-making but, but many AYAs appreciated the role of parents in providing support and guidance throughout the process. Healthcare professionals are encouraged to autonomously engage AYA's around fertility decision making, while concurrently offering opportunities that promotes parental support. | Low    |
| 15<br>16<br>17<br>18<br>19<br>20<br>21<br>22<br>23<br>24<br>25<br>26<br>27<br>28 | Hart (2020)    | The Challenges of Making Informed Decisions About Treatment and Trial Participation Following Cancer: A Qualitative Study with Adolescent and Young Adults with Cancer and Care Givers | UK Multicentre          | Qualitative – <u>thematic analysis</u><br><i>Semi-structured interviews.</i> | Shared decision-making – primary treatment and trial participation – at diagnosis.                                                                     | <u>33 participants:</u><br><b>18 AYACs (age range: 16-24 years)</b><br>15 supporters                                                                                                              | AYACs struggled to process information around diagnosis, exacerbated by symptom burden, emotions, and the fast pace of clinical activity. Some AYACs disengaged from conversation topics which were distressing. There are limited options for 'real' decision-making at diagnosis. However, many preferred this when they were already overwhelmed by emotions/symptoms. For trial enrollment, many AYACs allowed themselves to be steered by the recommendation of the healthcare professional who recruited them, thinking they were acting in their best interests.                                      | Medium |
| 29<br>30<br>31<br>32<br>33<br>34<br>35<br>36<br>37<br>38<br>39                   | Hong (2016)    | Care Partnerships: toward technology to support teen's participation in their health care                                                                                              | US multicentre          | Qualitative semi-structured interviews and observations                      | To investigate how technology can support the partnerships between AYACs, parents and clinicians when the AYAC is experiencing complex chronic illness | <u>33 interviews.</u><br><b>15 with AYACs (13 of whom had cancer. age range 13-17)</b><br>15 parents (10 mothers, 1 fathers, 1 aunt and 2 fathers and mothers together)<br>8 clinician caregivers | Participants faced challenges concerning:<br>1) Teens' limited participation in their care<br>2) communicating emotionally sensitive information<br>3) managing physical and emotional responses<br>Time alone with clinicians was important. Mutual protectionism or the need to "emotionally protect each other" was prevalent.                                                                                                                                                                                                                                                                            | Medium |

|    |             |                        |         |                   |                   |                                    |                                                |     |
|----|-------------|------------------------|---------|-------------------|-------------------|------------------------------------|------------------------------------------------|-----|
| 1  | Ingersgaard | A qualitative study    | Denmark | qualitative       | To explore        | <u>16 participants</u>             | Key themes                                     | Low |
| 2  | (2018)      | on decision-making     |         | exploratory study | patients' and     | <b>5 AYACs (age range 12-16)</b>   | 1) altruism - wanting to help future AYACs     |     |
| 3  |             | on Phase III           |         | - in-depth semi-  | AYACs' motivs     | 6 parents of AYACs                 | 2) trust in the clinicians                     |     |
| 4  |             | randomized clinical    |         | structured        | for accepting/    | 5 parents of children aged 3-      | 3) individuals perceptions of cure contra      |     |
| 5  |             | trial participation in |         | interviews with   | declining         | 10 years with cancer               | toxicity                                       |     |
| 6  |             | paediatric             |         | thematic analysis | participation in  |                                    | 4) adolescents as active participants in the   |     |
| 7  |             | oncology:              |         |                   | the AL2008 trial  |                                    | decision making process                        |     |
| 8  |             | adolescents' and       |         |                   | and adolescents'  |                                    | 5) parental responsibility and authority       |     |
| 9  |             | parents'               |         |                   | involvement in    |                                    | 6) the difficulty of uncertainty               |     |
| 10 |             | perspectives and       |         |                   | decision making   |                                    |                                                |     |
| 11 |             | preferences            |         |                   |                   |                                    |                                                |     |
| 12 | Jacobs      | Adolescent end of      | Norway  | Qualitative       | To explore        | <u>17 adolescent/ family dyads</u> | Adolescents with cancer were comfortable       | Low |
| 13 | (2015)      | life preferences and   |         | three sessions of | AYACs' end of     | <b>17 AYACs (age range 14-</b>     | discussing EOL, and the majority preferred to  |     |
| 14 |             | congruence with        |         | dyadic interviews | life preferences  | <b>21, 71% under 18)</b>           | talk about EOL issues before they are facing   |     |
| 15 |             | their parents'         |         |                   | and to assess the |                                    | EOL. There were substantive areas of agreement |     |
| 16 |             | preferences: results   |         |                   | congruence of     |                                    | between adolescents and their surrogates, but  |     |
| 17 |             | of a survey of         |         |                   | these preferences |                                    | important facets of adolescents' EOL wishes    |     |
| 18 |             | adolescents with       |         |                   | with the parents' |                                    | were not known by their families, reinforcing  |     |
| 19 |             | cancer                 |         |                   | beliefs           |                                    | the importance of eliciting individual         |     |
| 20 |             |                        |         |                   |                   |                                    | preferences and engaging dyads so parents can  |     |
| 21 |             |                        |         |                   |                   |                                    | understand their children's wishes. 53% of     |     |
| 22 |             |                        |         |                   |                   |                                    | AYACs had never spoken about their end of life |     |
| 23 |             |                        |         |                   |                   |                                    | preferences but 82% considered it important to |     |
| 24 |             |                        |         |                   |                   |                                    | let their loved ones know their wishes.        |     |

|                                                                                                             |                    |                                                                                                                                                                                                                                            |                      |                                                                              |                                                                                                                                                             |                                                                                                                                                                                                 |                                                                                                                                                                                                                                                                                                                                                                                                                                                                                                                                                                                                                                                                                                                                                                                     |        |
|-------------------------------------------------------------------------------------------------------------|--------------------|--------------------------------------------------------------------------------------------------------------------------------------------------------------------------------------------------------------------------------------------|----------------------|------------------------------------------------------------------------------|-------------------------------------------------------------------------------------------------------------------------------------------------------------|-------------------------------------------------------------------------------------------------------------------------------------------------------------------------------------------------|-------------------------------------------------------------------------------------------------------------------------------------------------------------------------------------------------------------------------------------------------------------------------------------------------------------------------------------------------------------------------------------------------------------------------------------------------------------------------------------------------------------------------------------------------------------------------------------------------------------------------------------------------------------------------------------------------------------------------------------------------------------------------------------|--------|
| 1<br>2<br>3<br>4<br>5<br>6<br>7<br>8<br>9<br>10<br>11<br>12<br>13<br>14<br>15<br>16<br>17<br>18<br>19<br>20 | Korsvold<br>(2017) | A content analysis<br>of emotional<br>concerns expressed<br>at the time of<br>receiving a cancer<br>diagnosis: An<br>observational study<br>of consultations<br>with adolescent and<br>young adult<br>patients and their<br>family members | Norway               | exploratory<br>mixed methods<br>study<br><br>audio recorded<br>consultations | To investigate the<br>emotional<br>concerns of<br>AYACs at the<br>time of diagnosis<br>and how to<br>quantify how<br>healthcare<br>professionals<br>respond | <u>18 participants</u><br><b>9 AYACs (age range 13-23)</b><br>Present with mother (n=9),<br>father (n=1), sister (n=1) or<br>mother and father (n=2)                                            | Four major themes of emotional concerns<br>expressed by AYA patients and their family<br>members during consultations for a cancer<br>diagnosis:<br>1) side effects/late effects or infertility,<br>2) “what happens in the near future/practical<br>aspects”,<br>3) fear<br>4) sadness<br><br>AYA patients and family members expressed<br>emotional concerns. HCPs typically responded<br>by providing information, rather than affective<br>aspects of the concerns In the sadness theme<br>however, an explicit provide space affective<br>response was the most common response (n=8)<br>followed by an explicit provide space content<br>response (n=7)<br><br>To make patients ‘feel known’ HCP should pay<br>attention to the affective aspect of the expressed<br>concern. | Medium |
| 21<br>22<br>23<br>24<br>25<br>26<br>27<br>28                                                                | Lyon<br>(2013)     | Family-Centered<br>Advance Care<br>Planning for Teens<br>With Cancer                                                                                                                                                                       | USA<br>single centre | Qualitative<br>a randomised<br>control pilot<br>study                        | To examine the<br>efficacy of<br>family-centres<br>ACP                                                                                                      | <u>30 dyads</u><br><b>mean age of AYACs 16</b><br>17 were randomised to<br>intervention and 13 were<br>randomised to control<br>87% of surrogates were<br>biological parents and were<br>female | The model (ACP) increased congruence in the triad<br>compared to the control standard of care group–<br>so it is key. The family centres ACP AYACs<br>reported feeling more informed than the control<br>group                                                                                                                                                                                                                                                                                                                                                                                                                                                                                                                                                                      | Low    |



|    |        |                      |               |                           |                 |                                  |                                                    |        |
|----|--------|----------------------|---------------|---------------------------|-----------------|----------------------------------|----------------------------------------------------|--------|
| 1  | Mack   | Adolescent and       | USA           | Quantitative –            | Treatment       | 203 participants:                | A majority of AYACs (58%) want to share            | Medium |
| 2  | (2019) | Young Adult          | Single Centre | <u>multivariate</u>       | decision-making | <b>203 AYACs (age range: 15-</b> | decision-making with oncologists. The              |        |
| 3  |        | Cancer Patients’     |               | <u>analysis, logistic</u> |                 | <b>29 years)</b>                 | remainder were split between the AYAC              |        |
| 4  |        | Experiences with     |               | <u>regression</u>         |                 |                                  | wanting primary responsibility in decision-        |        |
| 5  |        | Treatment            |               |                           |                 |                                  | making (20%) or wanting their oncologist to        |        |
| 6  |        | Decision-Making      |               | <i>Surveys at</i>         |                 |                                  | have primary responsibility (22%).                 |        |
| 7  |        |                      |               | <i>diagnosis, 4 and</i>   |                 |                                  | A lower proportion of younger AYACs wanted         |        |
| 8  |        |                      |               | <i>12 months.</i>         |                 |                                  | sole responsibility but this did not achieve       |        |
| 9  |        |                      |               |                           |                 |                                  | statistical significance (P = 0.07).               |        |
| 10 |        |                      |               |                           |                 |                                  | The majority (90%) of AYACs who lived with a       |        |
| 11 |        |                      |               |                           |                 |                                  | parent/guardian wanted some form of input from     |        |
| 12 |        |                      |               |                           |                 |                                  | their parents (either collaborative or considering |        |
| 13 |        |                      |               |                           |                 |                                  | their opinion).                                    |        |
| 14 |        |                      |               |                           |                 |                                  | Younger AYACs (15-17 years) were more likely       |        |
| 15 |        |                      |               |                           |                 |                                  | to want greater involvement by their parents but   |        |
| 16 |        |                      |               |                           |                 |                                  | were also more likely to be less involved than     |        |
| 17 |        |                      |               |                           |                 |                                  | they wanted to be relative to their parents.       |        |
| 18 |        |                      |               |                           |                 |                                  | Decisional regret was less likely among AYACs      |        |
| 19 |        |                      |               |                           |                 |                                  | who trusted oncologists completely, and who        |        |
| 20 |        |                      |               |                           |                 |                                  | reported that oncologists understood what was      |        |
| 21 |        |                      |               |                           |                 |                                  | important to them when treatment started.          |        |
| 22 | Mobley | Clinical Trial       | USA           | <u>Qualitative</u>        | Clinical trial  | <u>9 participants:</u>           | Consent encompassed the first discussion of CCT.   | Medium |
| 23 | (2023) | Participation: A     |               | <u>Grounded theory</u>    | participation   | <b>9 AYACs (age range 16-20)</b> | Patients reflected positive and negative effects   |        |
| 24 |        | qualitative study of |               | <u>analysis of semi-</u>  |                 |                                  | of timing, decisional role, and emotional impact.  |        |
| 25 |        | Adolescents and      |               | <u>structured</u>         |                 |                                  | Informing participation involved decision-making   |        |
| 26 |        | Younger Adults       |               | <u>interviews</u>         |                 |                                  | processes, specific knowledge, understanding       |        |
| 27 |        | Recently             |               |                           |                 |                                  | and external influence.                            |        |
| 28 |        | Diagnosed with       |               |                           |                 |                                  | Participant relationships emphasized the           |        |
| 29 |        | Cancer               |               |                           |                 |                                  | importance of communication and relationships      |        |
| 30 |        |                      |               |                           |                 |                                  | with providers and parents. Patient determinants   |        |
| 31 |        |                      |               |                           |                 |                                  | centered on motives from different perspectives,   |        |
| 32 |        |                      |               |                           |                 |                                  | pre-conceived attitudes, and understanding of      |        |
| 33 |        |                      |               |                           |                 |                                  | CCTs.                                              |        |

For peer review only

|    |          |                  |     |             |                   |                             |                                                  |        |
|----|----------|------------------|-----|-------------|-------------------|-----------------------------|--------------------------------------------------|--------|
| 1  | Olsavsky | Family           | USA | Qualitative | To explore        | 87 participants:            | Five process themes:                             | Medium |
| 2  | (2021)   | communication    |     |             | fertility         | <b>33 AYAC aged 12-25</b>   | (1) Reliance on health care team and social      |        |
| 3  |          | about fertility  |     |             | preservation      | 32 mothers                  | support networks to facilitate FP decisions      |        |
| 4  |          | preservation in  |     |             | communication     | 22 fathers                  | (noted just by parents),                         |        |
| 5  |          | adolescent males |     |             | among mothers,    | Representing 37 families in | (2) withholding parental opinion and deferring   |        |
| 6  |          | newly diagnosed  |     |             | fathers and their | total.                      | the decision to the adolescent,                  |        |
| 7  |          | with cancer      |     |             | male adolescents  |                             | (3) ease of communication,                       |        |
| 8  |          |                  |     |             | newly diagnosed   |                             | (4) communication barriers and facilitators,     |        |
| 9  |          |                  |     |             | with cancer.      |                             | (5) not being present or not remembering details |        |
| 10 |          |                  |     |             |                   |                             | of FP conversations.                             |        |
| 11 |          |                  |     |             |                   |                             | Four content themes:                             |        |
| 12 |          |                  |     |             |                   |                             | (1) preference for biological parenthood (or     |        |
| 13 |          |                  |     |             |                   |                             | grandparenthood),                                |        |
| 14 |          |                  |     |             |                   |                             | (2) consideration of future partner of AYAC's    |        |
| 15 |          |                  |     |             |                   |                             | desire for biological parenthood,                |        |
| 16 |          |                  |     |             |                   |                             | (3) sperm banking whilst it is a viable option,  |        |
| 17 |          |                  |     |             |                   |                             | (4) openness to alternative parenthood options   |        |

For peer review only

1  
2  
3  
4  
5  
6  
7  
8  
9  
10  
11  
12  
13  
14  
15  
16  
17  
18  
19  
20  
21  
22  
23  
24  
25  
26  
27  
28  
29  
30  
31  
32  
33  
34  
35  
36  
37  
38  
39  
40  
41  
42  
43  
44  
45  
46  
47

Patterson (2012) The Unmet Needs of Emerging Adults With a Cancer Diagnosis Australasia

Qualitative

Aim to contribute to the limited research base and inform our understanding of the needs of emerging adults with a diagnosis of cancer from a developmental perspective that appreciates the key transitional tasks of emerging adulthood identified by Arnett

14 Participants:  
**14 AYAC aged 20-25,**  
average age of 22

A cancer experience poses the potential for significant impact on the four requirements for achievement of adulthood.

The needs of these emerging adults were grouped into six themes; information, healthcare provision, daily living, interpersonal support, identity renegotiation and emotional distress.

These themes relate directly to the four requirements of adulthood.

1. The task of accepting responsibility for oneself emphasises the importance of empowering AYAC in their communication with HCP.
2. The task of deciding on personal beliefs and values highlights the importance of keeping the AYAC informed and encouraging them in decisions giving maximum opportunity to explore beliefs.
3. Establishing a relationship with parents as equals highlights the importance of maximising AYAC autonomy in relation to supporters.
4. The task of becoming financially independent highlights the importance of minimising disruption to daily life.

For peer review only

|                                                                                                                                              |                      |                                                                                        |                    |                                                                                          |                                                                                                     |                                                                                          |                                                                                                                                                                                                                                                                                                                                                                                                                                                                                                                                                                                                                                                                                                                                                                                                                                                                                                                                         |        |
|----------------------------------------------------------------------------------------------------------------------------------------------|----------------------|----------------------------------------------------------------------------------------|--------------------|------------------------------------------------------------------------------------------|-----------------------------------------------------------------------------------------------------|------------------------------------------------------------------------------------------|-----------------------------------------------------------------------------------------------------------------------------------------------------------------------------------------------------------------------------------------------------------------------------------------------------------------------------------------------------------------------------------------------------------------------------------------------------------------------------------------------------------------------------------------------------------------------------------------------------------------------------------------------------------------------------------------------------------------------------------------------------------------------------------------------------------------------------------------------------------------------------------------------------------------------------------------|--------|
| 1<br>2<br>3<br>4<br>5<br>6<br>7<br>8<br>9<br>10<br>11<br>12<br>13<br>14<br>15<br>16<br>17<br>18<br>19<br>20<br>21<br>22<br>23                | Pennant<br>(2020)    | The Role of Social Support in Adolescent/Young Adults Coping with Cancer Treatment     | USA                | Qualitative                                                                              | To explore specific actions that help AYAC and what behaviours they want from their social supports | <u>20 Participants:</u><br><b>10 AYAC ages 15-26</b> , mean age 18.9 years<br>10 parents | Themes of support included; presence, distraction, positive attitude, maintaining AYAC autonomy, communication and advocacy.<br>Mothers were the most noted family support.<br>AYAC patients can differ in their preferences throughout treatment and this can, at times, appear contradictory.<br>AYACs appear to want autonomy and independence, but appreciate help with daily tasks from their parents.<br>They express the desire for privacy, but also value physical presence and communication<br>Parents must oscillate between being involved in and catering to their AYAC child's needs during treatment while allowing space for independence and autonomy.<br>The findings underscore the importance of maintaining open communication with AYAC patients about their preferences and needs throughout the course of treatment and asking them about both individual and social preferences, which may change frequently. | Medium |
| 24<br>25<br>26<br>27<br>28<br>29<br>30<br>31<br>32<br>33<br>34<br>35<br>36<br>37<br>38<br>39<br>40<br>41<br>42<br>43<br>44<br>45<br>46<br>47 | Pyke-Grimm<br>(2020) | 3 Dimensions of Treatment Decision Making in Adolescents and Young Adults with Cancer. | USA<br>Multicentre | Qualitative – <u>ethnographic</u><br><br><i>Semi-structured interviews, field notes.</i> | Explore the preferences of AYACs for involvement in healthcare decisions                            | <u>16 participants:</u><br><b>16 AYACs (age range: 14.7-20 years)</b>                    | Emotions around diagnosis inhibit information receptiveness and ability to engage in treatment decisions (especially important decisions).<br>Initially AYACs struggle with the jargon and plethora of medical terms which are being used. They have limited knowledge which limits their questions, this increases over time.<br>The importance of decisions differs from one AYACs to the next. Also, some decisions are seen as having only one 'real' option.<br>AYACs engaged in minor decisions much earlier in their treatment, and some began engaging in more important decisions later in treatment.<br>AYACs could adopt an active (sole decision maker), collaborative (with healthcare professionals/supporters) or passive (healthcare professionals/supporters as decision makers) role.                                                                                                                                 | Medium |

|                                                                                              |                   |                                                                                                             |                         |                                                                                                                   |                                                                                                            |                                                                                                                          |                                                                                                                                                                                                                                                                                                                                                                                                                                                                                                                                                                                                                                                                                                                               |        |
|----------------------------------------------------------------------------------------------|-------------------|-------------------------------------------------------------------------------------------------------------|-------------------------|-------------------------------------------------------------------------------------------------------------------|------------------------------------------------------------------------------------------------------------|--------------------------------------------------------------------------------------------------------------------------|-------------------------------------------------------------------------------------------------------------------------------------------------------------------------------------------------------------------------------------------------------------------------------------------------------------------------------------------------------------------------------------------------------------------------------------------------------------------------------------------------------------------------------------------------------------------------------------------------------------------------------------------------------------------------------------------------------------------------------|--------|
| 1<br>2<br>3<br>4<br>5<br>6<br>7<br>8<br>9<br>10<br>11<br>12<br>13<br>14                      | Pyke-Grimm (2022) | Day-to-Day Decision Making by Adolescents and Young Adults with Cancer                                      | USA                     | Qualitative Interpretive focused ethnography within the sociologic tradition, informed by symbolic interactionism | To explore involvement of AYAs with cancer in day-to-day decisions affected by their cancer and treatment. | <u>16 Participants:</u><br><b>16 AYAC aged 15-20 (at time of interview - with an average of one year from diagnosis)</b> | Factors influence the involvement of AYAC in decision making such as the type of decision, the point in the cancer journey. They want to be involved.<br>Four day to day decision making categories were identified: mental mindset, self care practices, self-advocacy and negotiating relationships.<br>Parents were often present and staying strong was a recurring theme across mental mindset and negotiating relationships.<br>HCP are critical to facilitate AYAC participation in day to day decision making by encouraging autonomy and with effective communication.                                                                                                                                               | Medium |
| 15<br>16<br>17<br>18<br>19<br>20<br>21<br>22<br>23<br>24<br>25<br>26<br>27<br>28<br>29<br>30 | Sawyer (2019)     | Developmentally Appropriate Care for Adolescents and Young Adults with Cancer: How Well is Australia Doing? | Australasia Multicentre | Quantitative – <u>Chi-squared and Fisher’s exact test</u><br><br><i>Single time point survey.</i>                 | Explore quality of AYAC care in Australia.                                                                 | <u>196 participants:</u><br><b>196 AYACs (age range: 15-25 years)</b>                                                    | >90% of AYACs reported positive responses for 11 of the 14 experience of care items which related to the quality of communication and general interactions with the cancer care team.<br>The most highly endorsed of these experiences of care items related to staff being friendly and respectful, communicating in ways that the AYAC understood, being supportive of AYACs asking questions and engaging families in discussion and decisions as the AYAC wished.<br>Older AYAC (20-25 years) report more empowerment to make decisions than younger AYACs and were more likely to report that healthcare professionals included their family in discussions and decision-making the way they wanted them to be included. | Low    |

For peer review only

|    |             |                  |             |                         |                |                                  |                                                     |      |
|----|-------------|------------------|-------------|-------------------------|----------------|----------------------------------|-----------------------------------------------------|------|
| 1  | Sisk (2022) | Interdependent   | USA         | Qualitative –           | Define         | <u>37 participants:</u>          | Building relationships: demonstrating clinical      | High |
| 2  |             | Functions of     | Multicentre | <u>content analysis</u> | communication  | <b>37 AYACs (age range: 12-</b>  | competence, reliability, empathy, and showing       |      |
| 3  |             | Communication    |             | <i>Semi-structured</i>  | functions from | <b>20 years; mean: 16 years)</b> | care and concern. When clinicians demonstrated      |      |
| 4  |             | with Adolescents |             | <i>interviews.</i>      | perspective of |                                  | these attributes, AYACs described feelings of       |      |
| 5  |             | and Young Adults |             |                         | AYACs.         |                                  | trust in the clinicians' ability and intent to care |      |
| 6  |             | in Oncology      |             |                         |                |                                  | for them.                                           |      |
| 7  |             |                  |             |                         |                |                                  | Exchanging information: providing accurate and      |      |
| 8  |             |                  |             |                         |                |                                  | transparent information that was adapted to         |      |
| 9  |             |                  |             |                         |                |                                  | AYACs' needs. These needs related to the            |      |
| 10 |             |                  |             |                         |                |                                  | amount, complexity, timing, and pacing of           |      |
| 11 |             |                  |             |                         |                |                                  | information, and balancing communication            |      |
| 12 |             |                  |             |                         |                |                                  | between parents and AYACs.                          |      |
| 13 |             |                  |             |                         |                |                                  | AYACs think honesty and transparency is             |      |
| 14 |             |                  |             |                         |                |                                  | important. However, transparency could be           |      |
| 15 |             |                  |             |                         |                |                                  | burdensome.                                         |      |
| 16 |             |                  |             |                         |                |                                  | Exploring uncertainties and fears of the future mad |      |
| 17 |             |                  |             |                         |                |                                  | AYACs feel better prepared and decreasing           |      |
| 18 |             |                  |             |                         |                |                                  | anxiety. There was variation between AYACs          |      |
| 19 |             |                  |             |                         |                |                                  | for exploring these unknowns.                       |      |
| 20 |             |                  |             |                         |                |                                  | AYACs varied in their preferences in sharing        |      |
| 21 |             |                  |             |                         |                |                                  | distressing information and whether healthcare      |      |
| 22 |             |                  |             |                         |                |                                  | professionals should remain present and or give     |      |
| 23 |             |                  |             |                         |                |                                  | AYACs their privacy.                                |      |
| 24 |             |                  |             |                         |                |                                  | AYACs often feel that treatment related decisions   |      |
| 25 |             |                  |             |                         |                |                                  | realistically only have one choice giving a sense   |      |
| 26 |             |                  |             |                         |                |                                  | of powerlessness. They played a greater role in     |      |
| 27 |             |                  |             |                         |                |                                  | decisions outside of treatment related areas.       |      |
| 28 |             |                  |             |                         |                |                                  | While some AYACs preferred very passive or          |      |
| 29 |             |                  |             |                         |                |                                  | active roles most described an interdependent       |      |
| 30 |             |                  |             |                         |                |                                  | process of communication involving them, their      |      |
| 31 |             |                  |             |                         |                |                                  | parents, and their clinicians.                      |      |
| 32 |             |                  |             |                         |                |                                  | Parents often served as a conduit and buffer of     |      |
| 33 |             |                  |             |                         |                |                                  | communication between the AYAC and                  |      |
| 34 |             |                  |             |                         |                |                                  | healthcare professional. Many described the         |      |
| 35 |             |                  |             |                         |                |                                  | integral role of parents in communication           |      |
| 36 |             |                  |             |                         |                |                                  | regardless of their age.                            |      |

|    |             |                                                                                                 |       |                                        |                                                                                                                                      |                                                                                   |                                                                                                                                                                                                                                                                                                                                                                                                                                                                                                                                               |        |
|----|-------------|-------------------------------------------------------------------------------------------------|-------|----------------------------------------|--------------------------------------------------------------------------------------------------------------------------------------|-----------------------------------------------------------------------------------|-----------------------------------------------------------------------------------------------------------------------------------------------------------------------------------------------------------------------------------------------------------------------------------------------------------------------------------------------------------------------------------------------------------------------------------------------------------------------------------------------------------------------------------------------|--------|
| 1  | Sisk (2022) | Co-management of communication and care in adolescent and young adult oncology                  | USA   | Qualitative Semi-structured interviews | Study aimed to learn how AYAs and parents shared and delegated roles in communication and care during and after treatment for cancer | <u>37 Participants:</u><br><b>37 AYAC aged 12-24</b><br><b>Mean age 16 years</b>  | There are 6 roles that AYAC co-manage with parents; managing information, managing social and emotional needs, managing health, advocacy and empowerment, making decisions and managing logistics.<br>Five factors that influence AYAC roles in communication were:<br>AYAC agency<br>Clinical encouragement<br>Emotional and physical well-being<br>Personality, preferences and values<br>Insights and skills<br><br>There are multiple benefits of engagement of the adolescent.                                                           | Medium |
| 16 | Son (2023)  | Family Communication About Cancer in Korea: A Dyadic Analysis of Parent-Adolescent Conversation | Korea | Qualitative descriptive study          | The aim was to understand communication experiences of Korean AYAC and their parents in the context of young adult cancer.           | <u>14 participants:</u><br><b>7 AYAC (ages 14-19 years)</b><br>and 7 parent pairs | The main theme was “experience the same thing but see it differently” along with three subthemes.<br>Different expectations for parent-adolescent communication, different views on communication challenges and limited sharing and progress in the conversation.<br>This study offers insights into different communication expectations and preferences between Korean adolescents and parents, and reasons for communication challenges, while emphasizing the individualized assessment of parent-adolescent communication between them. | Medium |

For peer review only

|                                                                                                       |                  |                                                                                                                         |                    |                                                                                          |                                                                                                                                                                                                                                                                                    |                                                                                                                                                                                 |                                                                                                                                                                                                                                                                                                                                                                                                                                                                                                                                                                                                                                                                  |        |
|-------------------------------------------------------------------------------------------------------|------------------|-------------------------------------------------------------------------------------------------------------------------|--------------------|------------------------------------------------------------------------------------------|------------------------------------------------------------------------------------------------------------------------------------------------------------------------------------------------------------------------------------------------------------------------------------|---------------------------------------------------------------------------------------------------------------------------------------------------------------------------------|------------------------------------------------------------------------------------------------------------------------------------------------------------------------------------------------------------------------------------------------------------------------------------------------------------------------------------------------------------------------------------------------------------------------------------------------------------------------------------------------------------------------------------------------------------------------------------------------------------------------------------------------------------------|--------|
| 1<br>2<br>3<br>4<br>5<br>6<br>7<br>8<br>9<br>10<br>11<br>12<br>13<br>14<br>15<br>16<br>17<br>18<br>19 | Viola<br>(2018)  | Problem-solving skills, parent-adolescent communication, dyadic functioning, and distress among adolescents with cancer | USA                | Mixed methods study                                                                      | The aim was to describe and assess how intrapersonal (i.e., problem-solving ability) and social-ecological factors (i.e., cancer-related communication with parents and parent-adolescent dyadic relationship quality) are associated with adolescent adjustment (i.e., distress). | 78 participants:<br>39 AYAC and 39 parent pairs<br><b>AYAC 14-20 mean age 16.1</b><br>39 Parents - 79.5 % mothers                                                               | Better adolescent problem solving skills and better parent problem solving skills were associated with lower adolescent distress.<br>Parents and adolescents reported similar moderate levels of cancer related communication problems.<br>The most commonly endorsed cancer-related problem was “not talking about what to do if the AYAC got significantly worse”.<br>Parents reported better problem solving ability and better dyadic functioning than their adolescent.                                                                                                                                                                                     | Low    |
| 20<br>21<br>22<br>23<br>24<br>25                                                                      | Weaver<br>(2016) | “Being a Good Patient” During Times of Illness as Defined by Adolescent Patients With Cancer                            | USA                | Qualitative - <u>semantic content analysis</u><br><br>Semi-structured interviews         |                                                                                                                                                                                                                                                                                    | 40 participants<br><b>AYAC ages 12-19</b><br>Mean age of 15.5 years                                                                                                             | The concepts of adherence and compliance were the primary phrases used to describe the good patient role, but always within the context of a relationship. Of note: A total of 23 adolescents requested to be interviewed alone with the interviewer (57.5%)                                                                                                                                                                                                                                                                                                                                                                                                     | Medium |
| 26<br>27<br>28<br>29<br>30<br>31<br>32<br>33<br>34<br>35<br>36<br>37<br>38<br>39<br>40                | Weaver<br>(2015) | Adolescents’ Preferences for Treatment Decisional Involvement During Their Cancer                                       | USA<br>Multicentre | Qualitative – <u>semantic content analysis</u><br><br><i>Semi-structured interviews.</i> | Investigate AYACs’ decision-making preferences and how supports and healthcare professionals can support involvement.                                                                                                                                                              | 40 participants:<br><b>40 AYACs (age range at interview: 12-18.9 years; 0.5-6 months from diagnosis/relapse)</b><br><br><i>NB: 34 AYACs primary diagnosis, 6 AYACs relapse.</i> | AYACs indicated a spectrum of preferred decisional roles, with the most common being an actively involved role (65%), although a shared decision-making approach was still valued.<br>AYACs recognized that situational and social contexts might shift their preferred level of involvement in medical decisions.<br>Although adolescents wanted to be involved in decisions, they also expressed an appreciation of family insight, parental presence, and clinician guidance.<br>AYACs can retrospectively identify their preferences for inclusion in medical decision-making, and even when preferring involvement, they value the input of trusted others. | Medium |



|    |                       |                                                                                                                                                             |        |                                                                                                            |                                                                                                                                                                     |                                                                                                                                                                   |                                                                                                                                                                                                                                                                                                                                                                                                                                                                                              |        |
|----|-----------------------|-------------------------------------------------------------------------------------------------------------------------------------------------------------|--------|------------------------------------------------------------------------------------------------------------|---------------------------------------------------------------------------------------------------------------------------------------------------------------------|-------------------------------------------------------------------------------------------------------------------------------------------------------------------|----------------------------------------------------------------------------------------------------------------------------------------------------------------------------------------------------------------------------------------------------------------------------------------------------------------------------------------------------------------------------------------------------------------------------------------------------------------------------------------------|--------|
| 1  | Wu (2021)             | Decisional conflicts, anxiety, and perceptions of shared decision-making in cancer treatment trajectory among adolescents with cancer: A longitudinal study | Taiwan | Qualitative. An explanatory mixed method was used, incorporating questionnaires and individual interviews. | To describe the perception on levels of decision-making during cancer treatment for adolescents with cancer and examine the trajectory of their decisional conflict | <u>44 participants:</u><br><b>22 AYAC</b> 11 male and 11 female<br>mean age 15.39<br><b>22 Supporters:</b><br>father n=1<br>mothers n=12<br>both n=6<br>other n=3 | Different levels of participation in shared decision making (SDM) during the treatment trajectory were found.<br>Participants experienced the highest decisional conflict during diagnosis.<br>Roles in healthcare communication varied from direct participation to indirect involvement.<br>Overall, participants reported that doctors and parents decided their level of involvement, communication and or decision making.                                                              | Medium |
| 13 | Zarnegar et al (2018) | Recall of Fertility Discussion by Adolescent Female Cancer Patients: A Survey-Based Pilot Study                                                             | USA    | Qualitative                                                                                                | To assess: recall of a fertility discussion, satisfaction with fertility knowledge, and identify factors that may influence recall.                                 | <u>19 participants:</u><br><b>19 AYAC</b> aged 13-18 years and a mean age of 15.6                                                                                 | 42% and 52% of AYAC did not recall discussion regarding treatment related infertility or fertility preservation during initial treatment planning.<br>63% of AYAC reported that parents made all or most of the decisions whereas 30.8% reported making decisions with parents.<br>Key Finding - A greater percentage of AYAC who reported making a joint decision with parents recalled 71% of fertility discussions than those who reported parents made most or all of medical decisions. | Medium |

24 †Age range at diagnosis is given except where this was not provided in the article in which alternative metrics are presented and this is highlighted.  
 25 AYA(C) = adolescent and young adult (with cancer); NOS = not otherwise specified; RM-ANOVA = repeated measures analysis of variance.

26  
27  
28  
29  
30  
31  
32  
33  
34  
35  
36  
37  
38  
39  
40  
41  
42  
43  
44

## Update – December 2023

### Medline

Ovid MEDLINE(R) and Epub Ahead of Print, In-Process, In-Data-Review & Other Non-Indexed Citations, Daily and Versions <1946 to December 19, 2023>

1 (Parent\* or guardian\* or mother\* or father\* or partner or wife or wives or husband\* or boyfriend\* or girlfriend\* or sibling\* or friend\* or carer\* or "third person" or caregiver\* or "care-giver\*" or spouse\* or supporter\* or support network\*).ti,ab. or parents/ or fathers/ or mothers/ or spouses/ or caregivers/ or siblings/ or friends/ or legal guardians/ 1148168

2 (TYA cancer or TYA oncology or AYA cancer or AYA oncology or (young adult adj3 (cancer or oncology or leuk?em\* or lymphom\* or h?ematol\*)) or ("teenage and young adult" adj3 cancer) or ("teenage and young adult" adj3 oncology) or (teenage\* adj3 cancer) or (teenage\* adj3 oncology) or (adolescen\* adj3 cancer) or (adolescen\* adj3 oncology) or (young people adj3 cancer) or (young people adj3 oncology) or ("teenage and young adult" adj3 leuk?emia\*) or (teenage\* adj3 leuk?emia\*) or (adolescen\* adj3 leuk?emia\*) or (young people adj3 leuk?emia\*) or (young adult adj3 leuk?emia\*) or ("teenage and young adult" adj3 h?ematol\*) or (teenage\* adj3 h?ematol\*) or (adolescen\* adj3 h?ematol\*) or (young people adj3 h?ematol\*) or (young adult adj3 h?ematol\*) or ("teenage and young adult" adj3 lymphom\*) or (teenage\* adj3 lymphom\*) or (adolescen\* adj3 lymphom\*) or (young people adj3 lymphom\*) or (young adult adj3 lymphom\*).ti,ab. or ((exp adolescent/ or exp young adult/) and exp neoplasms/) 337284

3 (Communicat\* or Disclos\* or inform\* or Interact\* or relationship\* or Conversation\* or Dialogue\* or triad\* or Interview\* or consult\* or decision making).ti,ab. or exp communication/ or exp disclosure/ or exp information dissemination/ or exp physician-patient relations/ 6147070

4 (affect\* or effect\* or influenc\* or resultant or impact\* or perception\* or perspective\* or encounter\* or preference or opinion or involvement or occurrence\* or feel or "go through" or experienc\*).ti,ab. 13278879

5 1 and 2 and 3 and 4 3519

6 limit 5 to english language 3399

7 (202211\* or 202212\* or 2023\* or 2024\*).dp. or (202211\* or 202212\* or 2023\* or 2024\*).ez. or (202211\* or 202212\* or 2023\* or 2024\*).ed. or (202211\* or 202212\* or 2023\* or 2024\*).ep. 1958643

8 6 and 7 163

### Embase

Embase <1974 to 2023 December 19>

- 1 (TYA cancer or TYA oncology or AYA cancer or AYA oncology or (young adult adj3  
2 (cancer or oncology or leuk?em\* or lymphom\* or h?ematol\*)) or ("teenage and young  
3 adult" adj3 cancer) or ("teenage and young adult" adj3 oncology) or (teenage\* adj3 cancer)  
4 or (teenage\* adj3 oncology) or (adolescen\* adj3 cancer) or (adolescen\* adj3 oncology) or  
5 (young people adj3 cancer) or (young people adj3 oncology) or ("teenage and young adult"  
6 adj3 leuk?emia\*) or (teenage\* adj3 leuk?emia\*) or (adolescen\* adj3 leuk?emia\*) or (young  
7 people adj3 leuk?emia\*) or (young adult adj3 leuk?emia\*) or ("teenage and young adult"  
8 adj3 h?ematol\*) or (teenage\* adj3 h?ematol\*) or (adolescen\* adj3 h?ematol\*) or (young  
9 people adj3 h?ematol\*) or (young adult adj3 h?ematol\*) or ("teenage and young adult" adj3  
10 lymphom\*) or (teenage\* adj3 lymphom\*) or (adolescen\* adj3 lymphom\*) or (young people  
11 adj3 lymphom\*) or (young adult adj3 lymphom\*)).ti,ab. or ((exp \*adolescent/ or exp \*young  
12 adult/) and exp \*neoplasm/) 10359
- 13 2 (Communicat\* or Disclos\* or inform\* or Interact\* or relationship\* or Conversation\*  
14 or Dialogue\* or triad\* or Interview\* or consult\* or decision making).ti,ab. or exp  
15 \*interpersonal communication/ or exp \*professional-patient relationship/ or exp  
16 \*information dissemination/ or exp \*conversation/ 7565603
- 17 3 (Parent\* or guardian\* or mother\* or father\* or partner or wife or wives or husband\*  
18 or boyfriend\* or girlfriend\* or sibling\* or friend\* or carer\* or "third person" or caregiver\* or  
19 "care-giver\*" or spouse\* or supporter\* or support network\*).ti,ab. or \*parent/ or \*father/  
20 or \*mother/ or \*spouse/ or \*caregiver/ or \*social worker/ or \*sibling/ or \*friend/ or \*legal  
21 guardian/ 1440315
- 22 4 (affect\* or effect\* or influenc\* or resultant or impact\* or perception\* or  
23 perspective\* or encounter\* or preference or opinion or involvement or occurrence\* or feel  
24 or "go through" or experienc\*).ti,ab. 16593794
- 25 5 1 and 2 and 3 and 4 1032
- 26 6 limit 5 to english language 1010
- 27 7 (202211\* or 202212\* or 2023\* or 2024\*).dc. or (202211\* or 202212\* or 2023\* or  
28 2024\*).dd. or (202211\* or 202212\* or 2023\* or 2024\*).dp.2647560
- 29 8 6 and 7 107

### PsycINFO (via Ebsco)

| #   | Query                   | Limiters/Expanders                                                           | Last Run<br>Via                                   | Results |
|-----|-------------------------|------------------------------------------------------------------------------|---------------------------------------------------|---------|
|     |                         |                                                                              | Interface -<br>EBSCOhost<br>Research<br>Databases |         |
|     |                         | Limiters -<br>Publication Date:<br>20221101-<br>20241231                     | Search<br>Screen -<br>Basic                       |         |
|     |                         | Expanders - Apply<br>equivalent subjects<br>Search modes -<br>Boolean/Phrase | Search<br>Database -<br>APA<br>PsycInfo           | 238     |
| S11 | S1 AND S2 AND S7 AND S8 | Expanders - Apply<br>equivalent subjects<br>Narrow by                        | Interface -<br>EBSCOhost<br>Research              | 6,315   |

|    |                                                                                                                                                                                                     |                     |             |           |
|----|-----------------------------------------------------------------------------------------------------------------------------------------------------------------------------------------------------|---------------------|-------------|-----------|
|    |                                                                                                                                                                                                     | Language: - english | Databases   |           |
|    |                                                                                                                                                                                                     | Search modes -      | Search      |           |
|    |                                                                                                                                                                                                     | Boolean/Phrase      | Screen -    |           |
|    |                                                                                                                                                                                                     |                     | Basic       |           |
|    |                                                                                                                                                                                                     |                     | Search      |           |
|    |                                                                                                                                                                                                     |                     | Database -  |           |
|    |                                                                                                                                                                                                     |                     | APA         |           |
|    |                                                                                                                                                                                                     |                     | PsycInfo    |           |
|    |                                                                                                                                                                                                     |                     | Interface - |           |
|    |                                                                                                                                                                                                     |                     | EBSCOhost   |           |
|    |                                                                                                                                                                                                     |                     | Research    |           |
|    |                                                                                                                                                                                                     |                     | Databases   |           |
|    |                                                                                                                                                                                                     |                     | Search      |           |
|    |                                                                                                                                                                                                     |                     | Screen -    |           |
|    |                                                                                                                                                                                                     |                     | Basic       |           |
|    |                                                                                                                                                                                                     | Expanders - Apply   | Search      |           |
|    |                                                                                                                                                                                                     | equivalent subjects | Database -  |           |
|    |                                                                                                                                                                                                     | Search modes -      | APA         |           |
| S9 | S1 AND S2 AND S7 AND S8                                                                                                                                                                             | Boolean/Phrase      | PsycInfo    | 6,549     |
|    |                                                                                                                                                                                                     |                     | Interface - |           |
|    |                                                                                                                                                                                                     |                     | EBSCOhost   |           |
|    |                                                                                                                                                                                                     |                     | Research    |           |
|    |                                                                                                                                                                                                     |                     | Databases   |           |
|    |                                                                                                                                                                                                     |                     | Search      |           |
|    |                                                                                                                                                                                                     |                     | Screen -    |           |
|    |                                                                                                                                                                                                     |                     | Basic       |           |
|    |                                                                                                                                                                                                     | Expanders - Apply   | Search      |           |
|    |                                                                                                                                                                                                     | equivalent subjects | Database -  |           |
|    |                                                                                                                                                                                                     | Search modes -      | APA         |           |
| S8 | (affect* or effect* or influenc* or resultant or impact* or perception* or perspective* or encounter* or preference or opinion or involvement or occurrence* or feel or "go through" or experienc*) | Boolean/Phrase      | PsycInfo    | 3,524,144 |
|    |                                                                                                                                                                                                     |                     | Interface - |           |
|    |                                                                                                                                                                                                     |                     | EBSCOhost   |           |
|    |                                                                                                                                                                                                     |                     | Research    |           |
|    |                                                                                                                                                                                                     |                     | Databases   |           |
|    |                                                                                                                                                                                                     |                     | Search      |           |
|    |                                                                                                                                                                                                     |                     | Screen -    |           |
|    |                                                                                                                                                                                                     |                     | Basic       |           |
|    |                                                                                                                                                                                                     | Expanders - Apply   | Search      |           |
|    |                                                                                                                                                                                                     | equivalent subjects | Database -  |           |
|    |                                                                                                                                                                                                     | Search modes -      | APA         |           |
| S7 | (S5) or (S3)                                                                                                                                                                                        | Boolean/Phrase      | PsycInfo    | 62,557    |
|    |                                                                                                                                                                                                     |                     | Interface - |           |
|    |                                                                                                                                                                                                     |                     | EBSCOhost   |           |
|    |                                                                                                                                                                                                     |                     | Research    |           |
|    |                                                                                                                                                                                                     |                     | Databases   |           |
|    |                                                                                                                                                                                                     |                     | Search      |           |
|    |                                                                                                                                                                                                     |                     | Screen -    |           |
|    |                                                                                                                                                                                                     |                     | Basic       |           |
|    |                                                                                                                                                                                                     | Expanders - Apply   | Search      |           |
|    |                                                                                                                                                                                                     | equivalent subjects | Database -  |           |
|    |                                                                                                                                                                                                     | Search modes -      | APA         |           |
| S6 | S4 AND S5                                                                                                                                                                                           | Boolean/Phrase      | PsycInfo    | 62,384    |

|    |    |                                                  |                     |  |                    |
|----|----|--------------------------------------------------|---------------------|--|--------------------|
| 1  |    |                                                  |                     |  |                    |
| 2  |    |                                                  |                     |  |                    |
| 3  |    |                                                  |                     |  |                    |
| 4  |    |                                                  |                     |  | Interface -        |
| 5  |    |                                                  |                     |  | EBSCOhost          |
| 6  |    |                                                  |                     |  | Research           |
| 7  |    |                                                  |                     |  | Databases          |
| 8  |    |                                                  |                     |  | Search             |
| 9  |    | ( (DE "neoplasms" OR DE "Benign Neoplasms"       |                     |  | Screen -           |
| 10 |    | OR DE "Breast Neoplasms" OR DE "Endocrine        |                     |  | Basic              |
| 11 |    | Neoplasms" OR DE "Leukemias" OR DE               | Expanders - Apply   |  | Search             |
| 12 |    | "Melanoma" OR DE "Metastasis" OR DE              | equivalent subjects |  | Database -         |
| 13 |    | "Nervous System Neoplasms" OR DE "Terminal       | Search modes -      |  | APA                |
| 14 | S5 | Cancer"))                                        | Boolean/Phrase      |  | PsycInfo 62,384    |
| 15 |    |                                                  |                     |  |                    |
| 16 |    |                                                  |                     |  | Interface -        |
| 17 |    |                                                  |                     |  | EBSCOhost          |
| 18 |    |                                                  |                     |  | Research           |
| 19 |    |                                                  |                     |  | Databases          |
| 20 |    |                                                  |                     |  | Search             |
| 21 |    | ( (DE "neoplasms" OR DE "Benign Neoplasms"       |                     |  | Screen -           |
| 22 |    | OR DE "Breast Neoplasms" OR DE "Endocrine        |                     |  | Basic              |
| 23 |    | Neoplasms" OR DE "Leukemias" OR DE               | Expanders - Apply   |  | Search             |
| 24 |    | "Melanoma" OR DE "Metastasis" OR DE              | equivalent subjects |  | Database -         |
| 25 |    | "Nervous System Neoplasms" OR DE "Terminal       | Search modes -      |  | APA                |
| 26 | S4 | Cancer"))                                        | Boolean/Phrase      |  | PsycInfo 62,384    |
| 27 |    |                                                  |                     |  |                    |
| 28 |    | ("TYA cancer" or "TYA oncology" or "AYA          |                     |  |                    |
| 29 |    | cancer" or "AYA oncology" or ("young adult" n3   |                     |  |                    |
| 30 |    | (cancer or oncology or leuk?em* or lymphom*      |                     |  |                    |
| 31 |    | or h?ematol*)) or ("teenage and young adult"     |                     |  |                    |
| 32 |    | n3 cancer) or ("teenage and young adult" n3      |                     |  |                    |
| 33 |    | oncology) or (teenage* n3 cancer) or (teenage*   |                     |  |                    |
| 34 |    | n3 oncology) or (adolescen* n3 cancer) or        |                     |  |                    |
| 35 |    | (adolescen* n3 oncology) or ("young people"      |                     |  |                    |
| 36 |    | n3 cancer) or ("young people" n3 oncology) or    |                     |  |                    |
| 37 |    | ("teenage and young adult" n3 leuk?emia*) or     |                     |  |                    |
| 38 |    | (teenage* n3 leuk?emia*) or (adolescen* n3       |                     |  | Interface -        |
| 39 |    | leuk?emia*) or ("young people" n3 leuk?emia*)    |                     |  | EBSCOhost          |
| 40 |    | or ("young adult" n3 leuk?emia*) or ("teenage    |                     |  | Research           |
| 41 |    | and young adult" n3 h?ematol*) or (teenage*      |                     |  | Databases          |
| 42 |    | n3 h?ematol*) or (adolescen* n3 h?ematol*) or    |                     |  | Search             |
| 43 |    | ("young people" n3 h?ematol*) or ("young         |                     |  | Screen -           |
| 44 |    | adult" n3 h?ematol*) or ("teenage and young      |                     |  | Basic              |
| 45 |    | adult" n3 lymphom*) or (teenage* n3              | Expanders - Apply   |  | Search             |
| 46 |    | lymphom*) or (adolescen* n3 lymphom*) or         | equivalent subjects |  | Database -         |
| 47 |    | ("young people" n3 lymphom*) or ("young          | Search modes -      |  | APA                |
| 48 | S3 | adult" n3 lymphom*))                             | Boolean/Phrase      |  | PsycInfo 2,072     |
| 49 |    |                                                  |                     |  |                    |
| 50 |    |                                                  |                     |  | Interface -        |
| 51 |    |                                                  |                     |  | EBSCOhost          |
| 52 |    |                                                  |                     |  | Research           |
| 53 |    |                                                  |                     |  | Databases          |
| 54 |    |                                                  |                     |  | Search             |
| 55 |    | (Communicat* or Disclos* or inform* or           |                     |  | Screen -           |
| 56 |    | Interact* or relationship* or Conversation* or   |                     |  | Basic              |
| 57 |    | Dialogue* or triad* or Interview* or consult* or | Expanders - Apply   |  | Search             |
| 58 |    | "decision making") or DE "communication" OR      | equivalent subjects |  | Database -         |
| 59 |    | DE "information dissemination" OR DE             | Search modes -      |  | APA                |
| 60 | S2 | "conversation"                                   | Boolean/Phrase      |  | PsycInfo 2,545,968 |

(Parent\* or guardian\* or mother\* or father\* or partner or wife or wives or husband\* or boyfriend\* or girlfriend\* or sibling\* or friend\* or teacher\* or social worker\* or carer\* or "third person" or caregiver\* or "care-giver\*" or spouse\* or chaperone\*) OR DE "parents" OR DE "mothers" OR DE "fathers" OR DE "spouses" OR DE "wives" OR DE "husbands" OR DE "siblings" OR DE "significant others" OR DE "social workers" OR DE "guardianship" OR DE "caregivers"

S1

Interface - EBSCOhost Research Databases Search Screen - Basic Search Database - APA PsycInfo 937,154

Expanders - Apply equivalent subjects Search modes - Boolean/Phrase

CINAHL (via Ebsco)

Wednesday, December 20, 2023 4:07:56 PM

| #  | Query                   | Limiters/Expanders                                                                                                       | Last Run Via                                                                               | Results |
|----|-------------------------|--------------------------------------------------------------------------------------------------------------------------|--------------------------------------------------------------------------------------------|---------|
| S7 | S1 AND S2 AND S3 AND S4 | Limiters - Publication Date: 20221101-20241231<br>Expanders - Apply equivalent subjects<br>Search modes - Boolean/Phrase | Interface - EBSCOhost Research Databases Search Screen - Advanced Search Database - CINAHL | 99      |
| S6 | S1 AND S2 AND S3 AND S4 | Expanders - Apply equivalent subjects<br>Narrow by Language: - english<br>Search modes - Boolean/Phrase                  | Interface - EBSCOhost Research Databases Search Screen - Advanced Search Database - CINAHL | 2,152   |
| S5 | S1 AND S2 AND S3 AND S4 | Expanders - Apply equivalent subjects<br>Search modes - Boolean/Phrase                                                   | Interface - EBSCOhost Research Databases Search Screen - Advanced Search Database - CINAHL | 2,189   |

|                                                                                                                                                                                                                      |    |                                                                                                                                                                                                                                                                                                                                                                                                                                                                                                                                                                                                                                                                                                                                                                                                                                                                                                                                                                                                 |                                                                        |                                                                                                  |           |
|----------------------------------------------------------------------------------------------------------------------------------------------------------------------------------------------------------------------|----|-------------------------------------------------------------------------------------------------------------------------------------------------------------------------------------------------------------------------------------------------------------------------------------------------------------------------------------------------------------------------------------------------------------------------------------------------------------------------------------------------------------------------------------------------------------------------------------------------------------------------------------------------------------------------------------------------------------------------------------------------------------------------------------------------------------------------------------------------------------------------------------------------------------------------------------------------------------------------------------------------|------------------------------------------------------------------------|--------------------------------------------------------------------------------------------------|-----------|
| 1<br>2<br>3<br>4<br>5<br>6<br>7<br>8<br>9<br>10<br>11<br>12<br>13<br>14<br>15                                                                                                                                        | S4 | (affect* or effect* or influenc* or resultant or impact* or perception* or perspective* or encounter* or preference or opinion or involvement or occurrence* or feel or "go through" or experienc*)                                                                                                                                                                                                                                                                                                                                                                                                                                                                                                                                                                                                                                                                                                                                                                                             | Expanders - Apply equivalent subjects<br>Search modes - Boolean/Phrase | Interface - EBSCOhost<br>Research Databases<br>Search Screen - Advanced Search Database - CINAHL | 3,149,468 |
| 16<br>17<br>18<br>19<br>20<br>21<br>22<br>23<br>24<br>25<br>26<br>27<br>28<br>29<br>30<br>31<br>32<br>33<br>34<br>35<br>36<br>37<br>38<br>39<br>40<br>41<br>42<br>43<br>44<br>45<br>46<br>47<br>48<br>49<br>50<br>51 | S3 | ("TYA cancer" or "TYA oncology" or "AYA cancer" or "AYA oncology" or ("young adult" n3 (cancer or oncology or leuk?em* or lymphom* or h?ematol*)) or ("teenage and young adult" n3 cancer) or ("teenage and young adult" n3 oncology) or (teenage* n3 cancer) or (teenage* n3 oncology) or (adolescen* n3 cancer) or (adolescen* n3 oncology) or ("young people" n3 cancer) or ("young people" n3 oncology) or ("teenage and young adult" n3 leuk?emia*) or (teenage* n3 leuk?emia*) or (adolescen* n3 leuk?emia*) or ("young people" n3 leuk?emia*) or ("young adult" n3 leuk?emia*) or ("teenage and young adult" n3 h?ematol*) or (teenage* n3 h?ematol*) or (adolescen* n3 h?ematol*) or ("young people" n3 h?ematol*) or ("young adult" n3 h?ematol*) or ("teenage and young adult" n3 lymphom*) or (teenage* n3 lymphom*) or (adolescen* n3 lymphom*) or ("young people" n3 lymphom*) or ("young adult" n3 lymphom*)) OR ((MH "adolescence+" OR MH "young adult+") AND (MH "neoplasms+")) | Expanders - Apply equivalent subjects<br>Search modes - Boolean/Phrase | Interface - EBSCOhost<br>Research Databases<br>Search Screen - Advanced Search Database - CINAHL | 61,263    |
| 52<br>53<br>54<br>55<br>56<br>57<br>58<br>59<br>60                                                                                                                                                                   | S2 | (Communicat* or Disclos* or inform* or Interact* or relationship* or Conversation* or Dialogue* or triad* or Interview* or consult* or "decision making") or MH "communication+" OR MH "discussion" OR MH "conversation"                                                                                                                                                                                                                                                                                                                                                                                                                                                                                                                                                                                                                                                                                                                                                                        | Expanders - Apply equivalent subjects<br>Search modes - Boolean/Phrase | Interface - EBSCOhost<br>Research Databases<br>Search Screen - Advanced                          | 2,080,061 |

|    |                                                                                                                                                                                                                                                                                                                                                                                                        |                                                                        |                                                                                               |         |
|----|--------------------------------------------------------------------------------------------------------------------------------------------------------------------------------------------------------------------------------------------------------------------------------------------------------------------------------------------------------------------------------------------------------|------------------------------------------------------------------------|-----------------------------------------------------------------------------------------------|---------|
|    | OR (MH "Professional-Patient Relations+")                                                                                                                                                                                                                                                                                                                                                              |                                                                        | Search Database - CINAHL                                                                      |         |
| S1 | (Parent* or guardian* or mother* or father* or partner or wife or wives or husband* or boyfriend* or girlfriend* or sibling* or friend* or teacher* or social worker* or carer* or "third person" or caregiver* or "care-giver*" or spouse* or chaperone*) OR MH "parents" OR MH "mothers" OR MH "fathers" OR MH "spouses" OR MH "siblings" OR MH "teachers" OR MH "social workers" OR MH "caregivers" | Expanders - Apply equivalent subjects<br>Search modes - Boolean/Phrase | Interface - EBSCOhost<br>Research Databases Search Screen - Advanced Search Database - CINAHL | 567,768 |

### Web of Science Core Collection

#### # Web of Science Search Strategy (v0.1)

#### # Database: Web of Science Core Collection

#### # Entitlements:

- WOS.IC: 1993 to 2023
- WOS.CCR: 1985 to 2023
- WOS.SCI: 1900 to 2023
- WOS.AHCI: 1975 to 2023
- WOS.BHCI: 2008 to 2023
- WOS.BSCI: 2008 to 2023
- WOS.ESCI: 2018 to 2023
- WOS.ISTP: 1990 to 2023
- WOS.SSCI: 1956 to 2023
- WOS.ISSHP: 1990 to 2023

#### # Searches:

1: TS=(Parent\* or guardian\* or mother\* or father\* or partner or wife or wives or husband\* or boyfriend\* or girlfriend\* or sibling\* or friend\* or teacher\* or social worker\* or carer\* or "third person" or caregiver\* or "care-giver\*" or spouse\* or chaperone\*)

Date Run: Wed Dec 20 2023 16:03:59 GMT+0000 (Greenwich Mean Time)

Results: 2283955

2: TS=("TYA cancer" or "TYA oncology" or "AYA cancer" or "AYA oncology" or ("young adult" near/3 (cancer or oncology or leuk?em\* or lymphom\* or h?ematol\*)) or ("teenage and young adult" near/3 cancer) or ("teenage and young adult" near/3 oncology) or (teenage\*



near/3 cancer) or (teenage\* near/3 oncology) or (adolescen\* near/3 cancer) or (adolescen\* near/3 oncology) or ("young people" near/3 cancer) or ("young people" near/3 oncology) or ("teenage and young adult" near/3 leuk?emia\*) or (teenage\* near/3 leuk?emia\*) or (adolescen\* near/3 leuk?emia\*) or ("young people" near/3 leuk?emia\*) or ("young adult" near/3 leuk?emia\*) or ("teenage and young adult" near/3 h?ematol\*) or (teenage\* near/3 h?ematol\*) or (adolescen\* near/3 h?ematol\*) or ("young people" near/3 h?ematol\*) or ("young adult" near/3 h?ematol\*) or ("teenage and young adult" near/3 lymphom\*) or (teenage\* near/3 lymphom\*) or (adolescen\* near/3 lymphom\*) or ("young people" near/3 lymphom\*) or ("young adult" near/3 lymphom\*)

Date Run: Wed Dec 20 2023 16:04:06 GMT+0000 (Greenwich Mean Time) Results: 8540

3: TS=( Communicat\* or Disclos\* or inform\* or Interact\* or relationship\* or Conversation\* or Dialogue\* or triad\* or Interview\* or consult\* or "decision making")

Date Run: Wed Dec 20 2023 16:04:13 GMT+0000 (Greenwich Mean Time) Results: 12748181

4: TS= (affect\* or effect\* or influenc\* or resultant or impact\* or perception\* or perspective\* or encounter\* or preference or opinion or involvement or occurance\* or feel or "go through" or experienc\*)

Date Run: Wed Dec 20 2023 16:04:19 GMT+0000 (Greenwich Mean Time) Results: 26006930

5: #4 AND #3 AND #2 AND #1

Date Run: Wed Dec 20 2023 16:04:26 GMT+0000 (Greenwich Mean Time) Results: 764

6: #4 AND #3 AND #2 AND #1 and English (Languages)

Date Run: Wed Dec 20 2023 16:04:35 GMT+0000 (Greenwich Mean Time) Results: 737

7: #4 AND #3 AND #2 AND #1 and English (Languages) and 2022 or 2023 (Publication Years)

Date Run: Wed Dec 20 2023 16:04:39 GMT+0000 (Greenwich Mean Time) Results: 132

#### AMED via Ovid

AMED (Allied and Complementary Medicine) <1985 to October 2023>

1 (Parent\* or guardian\* or mother\* or father\* or partner or wife or wives or husband\* or boyfriend\* or girlfriend\* or sibling\* or friend\* or carer\* or "third person" or caregiver\* or "care-giver\*" or spouse\* or supporter\* or support network\*).ti,ab. 14291

2 (TYA cancer or TYA oncology or AYA cancer or AYA oncology or (young adult adj3 (cancer or oncology or leuk?em\* or lymphom\* or h?ematol\*)) or ("teenage and young adult" adj3 cancer) or ("teenage and young adult" adj3 oncology) or (teenage\* adj3 cancer) or (teenage\* adj3 oncology) or (adolescen\* adj3 cancer) or (adolescen\* adj3 oncology) or (young people adj3 cancer) or (young people adj3 oncology) or ("teenage and young adult" adj3 leuk?emia\*) or (teenage\* adj3 leuk?emia\*) or (adolescen\* adj3 leuk?emia\*) or (young people adj3 leuk?emia\*) or (young adult adj3 leuk?emia\*) or ("teenage and young adult" adj3 h?ematol\*) or (teenage\* adj3 h?ematol\*) or (adolescen\* adj3 h?ematol\*) or (young people adj3 h?ematol\*) or (young adult adj3 h?ematol\*) or ("teenage and young adult" adj3

1  
2  
3 lymphom\*) or (teenage\* adj3 lymphom\*) or (adolescen\* adj3 lymphom\*) or (young people  
4 adj3 lymphom\*) or (young adult adj3 lymphom\*)).ti,ab. 120

5  
6 3 (Communicat\* or Disclos\* or inform\* or Interact\* or relationship\* or Conversation\*  
7 or Dialogue\* or triad\* or Interview\* or consult\* or decision making).ti,ab. 60609

8 4 (affect\* or effect\* or influenc\* or resultant or impact\* or perception\* or  
9 perspective\* or encounter\* or preference or opinion or involvement or occurrence\* or feel  
10 or "go through" or experienc\*).ti,ab. 143225

11  
12 5 1 and 2 and 3 and 4 19

13 6 limit 5 to yr="2005 -Current" 14  
14  
15  
16  
17  
18  
19  
20  
21  
22  
23  
24  
25  
26  
27  
28  
29  
30  
31  
32  
33  
34  
35  
36  
37  
38  
39  
40  
41  
42  
43  
44  
45  
46  
47  
48  
49  
50  
51  
52  
53  
54  
55  
56  
57  
58  
59  
60

For peer review only

## First run – November 2022

### Medline (via Ovid)

Ovid MEDLINE(R) and Epub Ahead of Print, In-Process, In-Data-Review & Other Non-Indexed Citations, Daily and Versions <1946 to November 23, 2022>

- 1 (Parent\* or guardian\* or mother\* or father\* or partner or wife or wives or husband\* or boyfriend\* or girlfriend\* or sibling\* or friend\* or carer\* or "third person" or caregiver\* or "care-giver\*" or spouse\* or supporter\* or support network\*).ti,ab. or parents/ or fathers/ or mothers/ or spouses/ or caregivers/ or siblings/ or friends/ or legal guardians/ 1074121
- 2 (TYA cancer or TYA oncology or AYA cancer or AYA oncology or (young adult adj3 (cancer or oncology or leuk?em\* or lymphom\* or h?ematol\*)) or ("teenage and young adult" adj3 cancer) or ("teenage and young adult" adj3 oncology) or (teenage\* adj3 cancer) or (teenage\* adj3 oncology) or (adolescen\* adj3 cancer) or (adolescen\* adj3 oncology) or (young people adj3 cancer) or (young people adj3 oncology) or ("teenage and young adult" adj3 leuk?emia\*) or (teenage\* adj3 leuk?emia\*) or (adolescen\* adj3 leuk?emia\*) or (young people adj3 leuk?emia\*) or (young adult adj3 leuk?emia\*) or ("teenage and young adult" adj3 h?ematol\*) or (teenage\* adj3 h?ematol\*) or (adolescen\* adj3 h?ematol\*) or (young people adj3 h?ematol\*) or (young adult adj3 h?ematol\*) or ("teenage and young adult" adj3 lymphom\*) or (teenage\* adj3 lymphom\*) or (adolescen\* adj3 lymphom\*) or (young people adj3 lymphom\*) or (young adult adj3 lymphom\*).ti,ab. or ((exp adolescent/ or exp young adult/) and exp neoplasms/) 333070
- 3 (Communicat\* or Disclos\* or inform\* or Interact\* or relationship\* or Conversation\* or Dialogue\* or triad\* or Interview\* or consult\* or decision making).ti,ab. or exp communication/ or exp disclosure/ or exp information dissemination/ or exp physician-patient relations/ 5715959
- 4 (affect\* or effect\* or influenc\* or resultant or impact\* or perception\* or perspective\* or encounter\* or preference or opinion or involvement or occurrence\* or feel or "go through" or experienc\*).ti,ab. 12406352
- 5 1 and 2 and 3 and 4 3380
- 6 limit 5 to (english language and yr="2005 -Current") 2715

### Embase (via Ovid)

Embase <1974 to 2022 November 23>

1 (TYA cancer or TYA oncology or AYA cancer or AYA oncology or (young adult adj3  
 2 (cancer or oncology or leuk?em\* or lymphom\* or h?ematol\*)) or ("teenage and young  
 3 adult" adj3 cancer) or ("teenage and young adult" adj3 oncology) or (teenage\* adj3 cancer)  
 4 or (teenage\* adj3 oncology) or (adolescen\* adj3 cancer) or (adolescen\* adj3 oncology) or  
 5 (young people adj3 cancer) or (young people adj3 oncology) or ("teenage and young adult"  
 6 adj3 leuk?emia\*) or (teenage\* adj3 leuk?emia\*) or (adolescen\* adj3 leuk?emia\*) or (young  
 7 people adj3 leuk?emia\*) or (young adult adj3 leuk?emia\*) or ("teenage and young adult"  
 8 adj3 h?ematol\*) or (teenage\* adj3 h?ematol\*) or (adolescen\* adj3 h?ematol\*) or (young  
 9 people adj3 h?ematol\*) or (young adult adj3 h?ematol\*) or ("teenage and young adult" adj3  
 10 lymphom\*) or (teenage\* adj3 lymphom\*) or (adolescen\* adj3 lymphom\*) or (young people  
 11 adj3 lymphom\*) or (young adult adj3 lymphom\*)).ti,ab. or ((exp \*adolescent/ or exp \*young  
 12 adult/) and exp \*neoplasm/) 9638

2 (Communicat\* or Disclos\* or inform\* or Interact\* or relationship\* or Conversation\*  
 3 or Dialogue\* or triad\* or Interview\* or consult\* or decision making).ti,ab. or exp  
 4 \*interpersonal communication/ or exp \*professional-patient relationship/ or exp  
 5 \*information dissemination/ or exp \*conversation/ 6997005

6 (Parent\* or guardian\* or mother\* or father\* or partner or wife or wives or husband\*  
 7 or boyfriend\* or girlfriend\* or sibling\* or friend\* or carer\* or "third person" or caregiver\* or  
 8 "care-giver\*" or spouse\* or supporter\* or support network\*).ti,ab. or \*parent/ or \*father/  
 9 or \*mother/ or \*spouse/ or \*caregiver/ or \*social worker/ or \*sibling/ or \*friend/ or \*legal  
 10 guardian/ 1339977

11 (affect\* or effect\* or influenc\* or resultant or impact\* or perception\* or  
 12 perspective\* or encounter\* or preference or opinion or involvement or occurrence\* or feel  
 13 or "go through" or experienc\*).ti,ab. 15453173

14 1 and 2 and 3 and 4 939

15 limit 5 to (english language and yr="2005 -Current") 873

PsychInfo (via Ebscohost)

| #   | Query                   | Limiters/Expanders                                                                                                                                               | Last Run Via                                                                                                 | Results |
|-----|-------------------------|------------------------------------------------------------------------------------------------------------------------------------------------------------------|--------------------------------------------------------------------------------------------------------------|---------|
| S11 | S1 AND S2 AND S7 AND S8 | Limiters -<br>Publication Year:<br>2005-2022<br>Expanders - Apply<br>equivalent subjects<br>Narrow by<br>Language: - english<br>Search modes -<br>Boolean/Phrase | Interface - EBSCOhost<br>Research Databases<br>Search Screen - Basic<br>Search<br>Database - APA<br>PsycInfo | 1,683   |
| S10 | S1 AND S2 AND S7 AND S8 | Expanders - Apply<br>equivalent subjects<br>Narrow by<br>Language: - english                                                                                     | Interface - EBSCOhost<br>Research Databases<br>Search Screen - Basic<br>Search                               | 1,981   |

1  
2  
3  
4  
5  
6  
7  
8  
9  
10  
11  
12  
13  
14  
15  
16  
17  
18  
19  
20  
21  
22  
23  
24  
25  
26  
27  
28  
29  
30  
31  
32  
33  
34  
35  
36  
37  
38  
39  
40  
41  
42  
43  
44  
45  
46  
47  
48  
49  
50  
51  
52  
53  
54  
55  
56  
57  
58  
59  
60

|    |                                                                                                                                                                                                                                                                                                                                        |                                                              |                                                               |           |
|----|----------------------------------------------------------------------------------------------------------------------------------------------------------------------------------------------------------------------------------------------------------------------------------------------------------------------------------------|--------------------------------------------------------------|---------------------------------------------------------------|-----------|
|    |                                                                                                                                                                                                                                                                                                                                        | Search modes -<br>Boolean/Phrase                             | Database - APA<br>PsycInfo                                    |           |
|    |                                                                                                                                                                                                                                                                                                                                        |                                                              | Interface - EBSCOhost<br>Research Databases                   |           |
|    |                                                                                                                                                                                                                                                                                                                                        | Expanders - Apply<br>equivalent subjects                     | Search Screen - Basic<br>Search                               |           |
| S9 | S1 AND S2 AND S7 AND S8                                                                                                                                                                                                                                                                                                                | Search modes -<br>Boolean/Phrase                             | Database - APA<br>PsycInfo                                    | 2,017     |
|    |                                                                                                                                                                                                                                                                                                                                        |                                                              | Interface - EBSCOhost<br>Research Databases                   |           |
|    |                                                                                                                                                                                                                                                                                                                                        | Expanders - Apply<br>equivalent subjects                     | Search Screen - Basic<br>Search                               |           |
| S8 | (affect* or effect* or influenc* or resultant or<br>impact* or perception* or perspective* or<br>encounter* or preference or opinion or<br>involvement or occurrence* or feel or "go through"<br>or experienc*)                                                                                                                        | Search modes -<br>Boolean/Phrase                             | Database - APA<br>PsycInfo                                    | 3,366,619 |
|    |                                                                                                                                                                                                                                                                                                                                        |                                                              | Interface - EBSCOhost<br>Research Databases                   |           |
|    |                                                                                                                                                                                                                                                                                                                                        | Expanders - Apply<br>equivalent subjects                     | Search Screen - Basic<br>Search                               |           |
| S7 | (S5) or (S3 )                                                                                                                                                                                                                                                                                                                          | Search modes -<br>Boolean/Phrase                             | Database - APA<br>PsycInfo                                    | 13,719    |
|    |                                                                                                                                                                                                                                                                                                                                        |                                                              | Interface - EBSCOhost<br>Research Databases                   |           |
|    |                                                                                                                                                                                                                                                                                                                                        | Expanders - Apply<br>equivalent subjects                     | Search Screen - Basic<br>Search                               |           |
| S6 | S4 AND S5                                                                                                                                                                                                                                                                                                                              | Search modes -<br>Boolean/Phrase                             | Database - APA<br>PsycInfo                                    | 13,275    |
|    |                                                                                                                                                                                                                                                                                                                                        | Expanders - Apply<br>equivalent subjects                     |                                                               |           |
|    |                                                                                                                                                                                                                                                                                                                                        | Narrow by<br>SubjectAge: -<br>adolescence (13-17<br>yrs)     |                                                               |           |
|    |                                                                                                                                                                                                                                                                                                                                        | Narrow by<br>SubjectAge: - young<br>adulthood (18-29<br>yrs) | Interface - EBSCOhost<br>Research Databases                   |           |
| S5 | (( DE "neoplasms" OR DE "Benign Neoplasms" OR<br>DE "Breast Neoplasms" OR DE "Endocrine<br>Neoplasms" OR DE "Leukemias" OR DE<br>"Melanoma" OR DE "Metastasis" OR DE "Nervous<br>System Neoplasms" OR DE "Terminal Cancer"))                                                                                                           | Search modes -<br>Boolean/Phrase                             | Search Screen - Basic<br>Search<br>Database - APA<br>PsycInfo | 13,275    |
|    |                                                                                                                                                                                                                                                                                                                                        |                                                              | Interface - EBSCOhost<br>Research Databases                   |           |
|    |                                                                                                                                                                                                                                                                                                                                        | Expanders - Apply<br>equivalent subjects                     | Search Screen - Basic<br>Search                               |           |
| S4 | (( DE "neoplasms" OR DE "Benign Neoplasms" OR<br>DE "Breast Neoplasms" OR DE "Endocrine<br>Neoplasms" OR DE "Leukemias" OR DE<br>"Melanoma" OR DE "Metastasis" OR DE "Nervous<br>System Neoplasms" OR DE "Terminal Cancer"))                                                                                                           | Search modes -<br>Boolean/Phrase                             | Database - APA<br>PsycInfo                                    | 58,767    |
|    |                                                                                                                                                                                                                                                                                                                                        |                                                              | Interface - EBSCOhost<br>Research Databases                   |           |
|    |                                                                                                                                                                                                                                                                                                                                        | Expanders - Apply<br>equivalent subjects                     | Search Screen - Basic<br>Search                               |           |
| S3 | ("TYA cancer" or "TYA oncology" or "AYA cancer"<br>or "AYA oncology" or ("young adult" n3 (cancer or<br>oncology or leuk?em* or lymphom* or<br>h?ematol*)) or ("teenage and young adult" n3<br>cancer) or ("teenage and young adult" n3<br>oncology) or (teenage* n3 cancer) or (teenage* n3<br>oncology) or (adolescen* n3 cancer) or | Search modes -<br>Boolean/Phrase                             | Database - APA<br>PsycInfo                                    | 1,864     |

(adolescen\* n3 oncology) or ("young people" n3 cancer) or ("young people" n3 oncology) or ("teenage and young adult" n3 leuk?emia\*) or (teenage\* n3 leuk?emia\*) or (adolescen\* n3 leuk?emia\*) or ("young people" n3 leuk?emia\*) or ("young adult" n3 leuk?emia\*) or ("teenage and young adult" n3 h?ematol\*) or (teenage\* n3 h?ematol\*) or (adolescen\* n3 h?ematol\*) or ("young people" n3 h?ematol\*) or ("young adult" n3 h?ematol\*) or ("teenage and young adult" n3 lymphom\*) or (teenage\* n3 lymphom\*) or (adolescen\* n3 lymphom\*) or ("young people" n3 lymphom\*) or ("young adult" n3 lymphom\*))

S2 (Communicat\* or Disclos\* or inform\* or Interact\* or relationship\* or Conversation\* or Dialogue\* or triad\* or Interview\* or consult\* or "decision making") or DE "communication" OR DE "information dissemination" OR DE "conversation"      Expanders - Apply equivalent subjects      Search modes - Boolean/Phrase      Interface - EBSCOhost Research Databases      Search Screen - Basic Search      Database - APA PsycInfo      2,423,980

S1 (Parent\* or guardian\* or mother\* or father\* or partner or wife or wives or husband\* or boyfriend\* or girlfriend\* or sibling\* or friend\* or teacher\* or social worker\* or carer\* or "third person" or caregiver\* or "care-giver\*" or spouse\* or chaperone\*) OR DE "parents" OR DE "mothers" OR DE "fathers" OR DE "spouses" OR DE "wives" OR DE "husbands" OR DE "siblings" OR DE "significant others" OR DE "social workers" OR DE "guardianship" OR DE "caregivers"      Expanders - Apply equivalent subjects      Search modes - Boolean/Phrase      Interface - EBSCOhost Research Databases      Search Screen - Basic Search      Database - APA PsycInfo      894,375

[CINAHL \(via Ebscohost\)](#)  
[Accessibility Information and Tips](#)

Print Search History

Thursday, November 24, 2022 6:21:27 PM

| #  | Query                   | Limiters/Expanders                                                                                                                                      | Last Run Via                                                                               | Results |
|----|-------------------------|---------------------------------------------------------------------------------------------------------------------------------------------------------|--------------------------------------------------------------------------------------------|---------|
| S7 | S1 AND S2 AND S3 AND S4 | Limiters - Published Date: 20050101-20221231<br>Expanders - Apply equivalent subjects<br>Narrow by Language: - english<br>Search modes - Boolean/Phrase | Interface - EBSCOhost Research Databases Search Screen - Advanced Search Database - CINAHL | 1,837   |

|                                                                                                                      |    |                                                                                                                                                                                                                                                                                                                                                                                                                                                                                                                                          |                                                                                                                        |                                                                                                     |           |
|----------------------------------------------------------------------------------------------------------------------|----|------------------------------------------------------------------------------------------------------------------------------------------------------------------------------------------------------------------------------------------------------------------------------------------------------------------------------------------------------------------------------------------------------------------------------------------------------------------------------------------------------------------------------------------|------------------------------------------------------------------------------------------------------------------------|-----------------------------------------------------------------------------------------------------|-----------|
| 1<br>2<br>3<br>4<br>5<br>6<br>7<br>8<br>9<br>10<br>11<br>12<br>13<br>14<br>15                                        | S6 | S1 AND S2 AND S3 AND S4                                                                                                                                                                                                                                                                                                                                                                                                                                                                                                                  | Limiters - Published Date: 20050101-20221231<br>Expanders - Apply equivalent subjects<br>Search modes - Boolean/Phrase | Interface - EBSCOhost<br>Research Databases<br>Search Screen - Advanced Search<br>Database - CINAHL | 1,866     |
| 16<br>17<br>18<br>19<br>20<br>21<br>22<br>23<br>24<br>25<br>26<br>27<br>28                                           | S5 | S1 AND S2 AND S3 AND S4                                                                                                                                                                                                                                                                                                                                                                                                                                                                                                                  | Expanders - Apply equivalent subjects<br>Search modes - Boolean/Phrase                                                 | Interface - EBSCOhost<br>Research Databases<br>Search Screen - Advanced Search<br>Database - CINAHL | 2,106     |
| 29<br>30<br>31<br>32<br>33<br>34<br>35<br>36<br>37<br>38<br>39<br>40                                                 | S4 | (affect* or effect* or influenc* or resultant or impact* or perception* or perspective* or encounter* or preference or opinion or involvement or occurance* or feel or "go through" or experienc*)                                                                                                                                                                                                                                                                                                                                       | Expanders - Apply equivalent subjects<br>Search modes - Boolean/Phrase                                                 | Interface - EBSCOhost<br>Research Databases<br>Search Screen - Advanced Search<br>Database - CINAHL | 3,016,184 |
| 41<br>42<br>43<br>44<br>45<br>46<br>47<br>48<br>49<br>50<br>51<br>52<br>53<br>54<br>55<br>56<br>57<br>58<br>59<br>60 | S3 | ("TYA cancer" or "TYA oncology" or "AYA cancer" or "AYA oncology" or ("young adult" n3 (cancer or oncology or leuk?em* or lymphom* or h?ematol*)) or ("teenage and young adult" n3 cancer) or ("teenage and young adult" n3 oncology) or (teenage* n3 cancer) or (teenage* n3 oncology) or (adolescen* n3 cancer) or (adolescen* n3 oncology) or ("young people" n3 cancer) or ("young people" n3 oncology) or ("teenage and young adult" n3 leuk?emia*) or (teenage* n3 leuk?emia*) or (adolescen* n3 leuk?emia*) or ("young people" n3 | Expanders - Apply equivalent subjects<br>Search modes - Boolean/Phrase                                                 | Interface - EBSCOhost<br>Research Databases<br>Search Screen - Advanced Search<br>Database - CINAHL | 59,927    |

|    |                                                                                                                                                                                                                                                                                                                                                                                                                                                              |                                                                                |                                                                                                           |                  |
|----|--------------------------------------------------------------------------------------------------------------------------------------------------------------------------------------------------------------------------------------------------------------------------------------------------------------------------------------------------------------------------------------------------------------------------------------------------------------|--------------------------------------------------------------------------------|-----------------------------------------------------------------------------------------------------------|------------------|
|    | <p>leuk?emia*) or ("young adult" n3 leuk?emia*) or ("teenage and young adult" n3 h?ematol*) or (teenage* n3 h?ematol*) or (adolescen* n3 h?ematol*) or ("young people" n3 h?ematol*) or ("young adult" n3 h?ematol*) or ("teenage and young adult" n3 lymphom*) or (teenage* n3 lymphom*) or (adolescen* n3 lymphom*) or ("young people" n3 lymphom*) or ("young adult" n3 lymphom*) OR ((MH "adolescence+" OR MH "young adult+") AND (MH "neoplasms+"))</p> |                                                                                |                                                                                                           |                  |
| S2 | <p>(Communicat* or Disclos* or inform* or Interact* or relationship* or Conversation* or Dialogue* or triad* or Interview* or consult* or "decision making") or MH "communication+" OR MH "discussion" OR MH "conversation" OR (MH "Professional-Patient Relations+")</p>                                                                                                                                                                                    | <p>Expanders - Apply equivalent subjects<br/>Search modes - Boolean/Phrase</p> | <p>Interface - EBSCOhost<br/>Research Databases<br/>Search Screen - Advanced Search Database - CINAHL</p> | <p>2,016,086</p> |
| S1 | <p>(Parent* or guardian* or mother* or father* or partner or wife or wives or husband* or boyfriend* or girlfriend* or sibling* or friend* or teacher* or social worker* or carer* or "third person" or caregiver* or "care-giver*" or spouse* or chaperone*) OR MH "parents" OR MH "mothers" OR MH "fathers" OR MH "spouses" OR MH "siblings" OR MH "teachers" OR MH "social workers" OR MH "caregivers"</p>                                                | <p>Expanders - Apply equivalent subjects<br/>Search modes - Boolean/Phrase</p> | <p>Interface - EBSCOhost<br/>Research Databases<br/>Search Screen - Advanced Search Database - CINAHL</p> | <p>544,991</p>   |

## Web of Science Core Collection

# Web of Science Search Strategy (v0.1)

# Database: Web of Science Core Collection

# Entitlements:

- WOS.IC: 1993 to 2022

- WOS.CCR: 1985 to 2022



- 1  
2  
3 - WOS.SCI: 1900 to 2022  
4 - WOS.AHCI: 1975 to 2022  
5 - WOS.BHCI: 2008 to 2022  
6 - WOS.BSCI: 2008 to 2022  
7 - WOS.ESCI: 2017 to 2022  
8 - WOS.ISTP: 1990 to 2022  
9 - WOS.SSCI: 1956 to 2022  
10 - WOS.ISSHP: 1990 to 2022  
11  
12  
13  
14

15 # Searches:  
16

17  
18 1: TS=(Parent\* or guardian\* or mother\* or father\* or partner or wife or wives or husband\*  
19 or boyfriend\* or girlfriend\* or sibling\* or friend\* or teacher\* or social worker\* or carer\* or  
20 "third person" or caregiver\* or "care-giver\*" or spouse\* or chaperone\*)  
21

22 Results: 2129759  
23

24 2: TS=("TYA cancer" or "TYA oncology" or "AYA cancer" or "AYA oncology" or ("young adult"  
25 near/3 (cancer or oncology or leuk?em\* or lymphom\* or h?ematol\*)) or ("teenage and  
26 young adult" near/3 cancer) or ("teenage and young adult" near/3 oncology) or (teenage\*  
27 near/3 cancer) or (teenage\* near/3 oncology) or (adolescen\* near/3 cancer) or (adolescen\*  
28 near/3 oncology) or ("young people" near/3 cancer) or ("young people" near/3 oncology) or  
29 ("teenage and young adult" near/3 leuk?emia\*) or (teenage\* near/3 leuk?emia\*) or  
30 (adolescen\* near/3 leuk?emia\*) or ("young people" near/3 leuk?emia\*) or ("young adult"  
31 near/3 leuk?emia\*) or ("teenage and young adult" near/3 h?ematol\*) or (teenage\* near/3  
32 h?ematol\*) or (adolescen\* near/3 h?ematol\*) or ("young people" near/3 h?ematol\*) or  
33 ("young adult" near/3 h?ematol\*) or ("teenage and young adult" near/3 lymphom\*) or  
34 (teenage\* near/3 lymphom\*) or (adolescen\* near/3 lymphom\*) or ("young people" near/3  
35 lymphom\*) or ("young adult" near/3 lymphom\*)) Results: 7793  
36  
37  
38  
39

40 3: TS=( Communicat\* or Disclos\* or inform\* or Interact\* or relationship\* or Conversation\*  
41 or Dialogue\* or triad\* or Interview\* or consult\* or "decision making")  
42

43 Results: 11889093  
44

45 4: TS= (affect\* or effect\* or influenc\* or resultant or impact\* or perception\* or perspective\*  
46 or encounter\* or preference or opinion or involvement or occurrence\* or feel or "go  
47 through" or experienc\*) Results: 24306121  
48

49 5: #4 AND #3 AND #2 AND #1 Results: 684  
50

51 6: #4 AND #3 AND #2 AND #1 Results: 684  
52

53  
54 7: #4 AND #3 AND #2 AND #1 and 2005 or 2006 or 2007 or 2008 or 2009 or 2010 or 2011 or  
55 2012 or 2013 or 2014 or 2015 or 2016 or 2017 or 2018 or 2019 or 2020 or 2021 or 2022  
56 (Publication Years) Results: 644  
57  
58  
59  
60

1  
2  
3 8: #4 AND #3 AND #2 AND #1 and 2005 or 2006 or 2007 or 2008 or 2009 or 2010 or 2011 or  
4 2012 or 2013 or 2014 or 2015 or 2016 or 2017 or 2018 or 2019 or 2020 or 2021 or 2022  
5 (Publication Years) and English (Languages) Results: 619  
6  
7  
8  
9  
10  
11  
12  
13  
14  
15  
16  
17  
18  
19  
20  
21  
22  
23  
24  
25  
26  
27  
28  
29  
30  
31  
32  
33  
34  
35  
36  
37  
38  
39  
40  
41  
42  
43  
44  
45  
46  
47  
48  
49  
50  
51  
52  
53  
54  
55  
56  
57  
58  
59  
60

For peer review only



## PRISMA 2020 Checklist

| Section and Topic             | Item # | Checklist item                                                                                                                                                                                                                                                                                       | Location where item is reported         |
|-------------------------------|--------|------------------------------------------------------------------------------------------------------------------------------------------------------------------------------------------------------------------------------------------------------------------------------------------------------|-----------------------------------------|
| <b>TITLE</b>                  |        |                                                                                                                                                                                                                                                                                                      |                                         |
| Title                         | 1      | Identify the report as a systematic review.                                                                                                                                                                                                                                                          | Page 1                                  |
| <b>ABSTRACT</b>               |        |                                                                                                                                                                                                                                                                                                      |                                         |
| Abstract                      | 2      | See the PRISMA 2020 for Abstracts checklist.                                                                                                                                                                                                                                                         | Page 2                                  |
| <b>INTRODUCTION</b>           |        |                                                                                                                                                                                                                                                                                                      |                                         |
| Rationale                     | 3      | Describe the rationale for the review in the context of existing knowledge.                                                                                                                                                                                                                          | Pages 3 and 4                           |
| Objectives                    | 4      | Provide an explicit statement of the objective(s) or question(s) the review addresses.                                                                                                                                                                                                               | Page 4                                  |
| <b>METHODS</b>                |        |                                                                                                                                                                                                                                                                                                      |                                         |
| Eligibility criteria          | 5      | Specify the inclusion and exclusion criteria for the review and how studies were grouped for the syntheses.                                                                                                                                                                                          | Page 5                                  |
| Information sources           | 6      | Specify all databases, registers, websites, organisations, reference lists and other sources searched or consulted to identify studies. Specify the date when each source was last searched or consulted.                                                                                            | Page 4 and supplemental file            |
| Search strategy               | 7      | Present the full search strategies for all databases, registers and websites, including any filters and limits used.                                                                                                                                                                                 | Page 4, Table 1 and supplemental file 1 |
| Selection process             | 8      | Specify the methods used to decide whether a study met the inclusion criteria of the review, including how many reviewers screened each record and each report retrieved, whether they worked independently, and if applicable, details of automation tools used in the process.                     | Page 5                                  |
| Data collection process       | 9      | Specify the methods used to collect data from reports, including how many reviewers collected data from each report, whether they worked independently, any processes for obtaining or confirming data from study investigators, and if applicable, details of automation tools used in the process. | Pages 4 and 5                           |
| Data items                    | 10a    | List and define all outcomes for which data were sought. Specify whether all results that were compatible with each outcome domain in each study were sought (e.g. for all measures, time points, analyses), and if not, the methods used to decide which results to collect.                        | Page 5                                  |
|                               | 10b    | List and define all other variables for which data were sought (e.g. participant and intervention characteristics, funding sources). Describe any assumptions made about any missing or unclear information.                                                                                         | Page 5                                  |
| Study risk of bias assessment | 11     | Specify the methods used to assess risk of bias in the included studies, including details of the tool(s) used, how many reviewers assessed each study and whether they worked independently, and if applicable, details of automation tools used in the process.                                    | Page 5                                  |
| Effect measures               | 12     | Specify for each outcome the effect measure(s) (e.g. risk ratio, mean difference) used in the synthesis or presentation of results.                                                                                                                                                                  | Page 5                                  |
| Synthesis methods             | 13a    | Describe the processes used to decide which studies were eligible for each synthesis (e.g. tabulating the study intervention characteristics and comparing against the planned groups for each synthesis (item #5)).                                                                                 | Page 5                                  |
|                               | 13b    | Describe any methods required to prepare the data for presentation or synthesis, such as handling of missing summary statistics, or data conversions.                                                                                                                                                | Page 5                                  |
|                               | 13c    | Describe any methods used to tabulate or visually display results of individual studies and syntheses.                                                                                                                                                                                               | Page 5                                  |
|                               | 13d    | Describe any methods used to synthesize results and provide a rationale for the choice(s). If meta-analysis was performed, describe the model(s), method(s) to identify the presence and extent of statistical heterogeneity, and software package(s) used.                                          | Page 5                                  |



## PRISMA 2020 Checklist

| Section and Topic             | Item # | Checklist item                                                                                                                                                                                                                                                                       | Location where item is reported     |
|-------------------------------|--------|--------------------------------------------------------------------------------------------------------------------------------------------------------------------------------------------------------------------------------------------------------------------------------------|-------------------------------------|
|                               | 13e    | Describe any methods used to explore possible causes of heterogeneity among study results (e.g. subgroup analysis, meta-regression).                                                                                                                                                 | Pages 5 and 6                       |
|                               | 13f    | Describe any sensitivity analyses conducted to assess robustness of the synthesized results.                                                                                                                                                                                         | Not applicable                      |
| Reporting bias assessment     | 14     | Describe any methods used to assess risk of bias due to missing results in a synthesis (arising from reporting biases).                                                                                                                                                              | Not applicable                      |
| Certainty assessment          | 15     | Describe any methods used to assess certainty (or confidence) in the body of evidence for an outcome.                                                                                                                                                                                | Not applicable                      |
| <b>RESULTS</b>                |        |                                                                                                                                                                                                                                                                                      |                                     |
| Study selection               | 16a    | Describe the results of the search and selection process, from the number of records identified in the search to the number of studies included in the review, ideally using a flow diagram.                                                                                         | Figure 1 page 6                     |
|                               | 16b    | Cite studies that might appear to meet the inclusion criteria, but which were excluded, and explain why they were excluded.                                                                                                                                                          | Figure 1 page 6                     |
| Study characteristics         | 17     | Cite each included study and present its characteristics.                                                                                                                                                                                                                            | Table 2 – summary of articles pages |
| Risk of bias in studies       | 18     | Present assessments of risk of bias for each included study.                                                                                                                                                                                                                         | Not reported                        |
| Results of individual studies | 19     | For all outcomes, present, for each study: (a) summary statistics for each group (where appropriate) and (b) an effect estimate and its precision (e.g. confidence/credible interval), ideally using structured tables or plots.                                                     | Not applicable                      |
| Results of syntheses          | 20a    | For each synthesis, briefly summarise the characteristics and risk of bias among contributing studies.                                                                                                                                                                               | Not applicable                      |
|                               | 20b    | Present results of all statistical syntheses conducted. If meta-analysis was done, present for each the summary estimate and its precision (e.g. confidence/credible interval) and measures of statistical heterogeneity. If comparing groups, describe the direction of the effect. | Not applicable                      |
|                               | 20c    | Present results of all investigations of possible causes of heterogeneity among study results.                                                                                                                                                                                       | Not applicable                      |
|                               | 20d    | Present results of all sensitivity analyses conducted to assess the robustness of the synthesized results.                                                                                                                                                                           | Not applicable                      |
| Reporting biases              | 21     | Present assessments of risk of bias due to missing results (arising from reporting biases) for each synthesis assessed.                                                                                                                                                              | Not applicable                      |
| Certainty of evidence         | 22     | Present assessments of certainty (or confidence) in the body of evidence for each outcome assessed.                                                                                                                                                                                  | Not applicable                      |
| <b>DISCUSSION</b>             |        |                                                                                                                                                                                                                                                                                      |                                     |
| Discussion                    | 23a    | Provide a general interpretation of the results in the context of other evidence.                                                                                                                                                                                                    | Pages 10 and 11                     |
|                               | 23b    | Discuss any limitations of the evidence included in the review.                                                                                                                                                                                                                      | Pages 11 and 12                     |



## PRISMA 2020 Checklist

| Section and Topic                              | Item # | Checklist item                                                                                                                                                                                                                             | Location where item is reported |
|------------------------------------------------|--------|--------------------------------------------------------------------------------------------------------------------------------------------------------------------------------------------------------------------------------------------|---------------------------------|
|                                                | 23c    | Discuss any limitations of the review processes used.                                                                                                                                                                                      | Pages 11 and 12                 |
|                                                | 23d    | Discuss implications of the results for practice, policy, and future research.                                                                                                                                                             | Page 12                         |
| <b>OTHER INFORMATION</b>                       |        |                                                                                                                                                                                                                                            |                                 |
| Registration and protocol                      | 24a    | Provide registration information for the review, including register name and registration number, or state that the review was not registered.                                                                                             | Page 3                          |
|                                                | 24b    | Indicate where the review protocol can be accessed, or state that a protocol was not prepared.                                                                                                                                             | Supplemental file               |
|                                                | 24c    | Describe and explain any amendments to information provided at registration or in the protocol.                                                                                                                                            | Not applicable                  |
| Support                                        | 25     | Describe sources of financial or non-financial support for the review, and the role of the funders or sponsors in the review.                                                                                                              | Page 13                         |
| Competing interests                            | 26     | Declare any competing interests of review authors.                                                                                                                                                                                         | Page 13                         |
| Availability of data, code and other materials | 27     | Report which of the following are publicly available and where they can be found: template data collection forms; data extracted from included studies; data used for all analyses; analytic code; any other materials used in the review. | Page 13                         |

From: Page MJ, McKenzie JE, Bossuyt PM, Boutron I, Hoffmann TC, Mulrow CD, et al. The PRISMA 2020 statement: an updated guideline for reporting systematic reviews. *BMJ* 2021;372:n71. doi: 10.1136/bmj.n71  
 For more information, visit: <http://www.prisma-statement.org/>
