# Supplementary material for: Triadic communication with teenagers and young adults with cancer: a systematic literature review – ‘make me feel like I’m not the third person’
Source: PubMed Central journal article supplement (PMC10875529; doi:10.1136/bmjopen-2023-080024), 2024-02-17
Supplement: bmjopen-2023-080024supp001.pdf [file bmjopen-2023-080024supp001.pdf]

## Update – December 2023

### Medline

Ovid MEDLINE(R) and Epub Ahead of Print, In-Process, In-Data-Review & Other Non-Indexed Citations, Daily and Versions <1946 to December 19, 2023>

1 (Parent\* or guardian\* or mother\* or father\* or partner or wife or wives or husband\* or boyfriend\* or girlfriend\* or sibling\* or friend\* or carer\* or "third person" or caregiver\* or "care-giver\*" or spouse\* or supporter\* or support network\*).ti,ab. or parents/ or fathers/ or mothers/ or spouses/ or caregivers/ or siblings/ or friends/ or legal guardians/ 1148168

2 (TYA cancer or TYA oncology or AYA cancer or AYA oncology or (young adult adj3 (cancer or oncology or leuk?em\* or lymphom\* or h?ematol\*)) or ("teenage and young adult" adj3 cancer) or ("teenage and young adult" adj3 oncology) or (teenage\* adj3 cancer) or (teenage\* adj3 oncology) or (adolescen\* adj3 cancer) or (adolescen\* adj3 oncology) or (young people adj3 cancer) or (young people adj3 oncology) or ("teenage and young adult" adj3 leuk?emia\*) or (teenage\* adj3 leuk?emia\*) or (adolescen\* adj3 leuk?emia\*) or (young people adj3 leuk?emia\*) or (young adult adj3 leuk?emia\*) or ("teenage and young adult" adj3 h?ematol\*) or (teenage\* adj3 h?ematol\*) or (adolescen\* adj3 h?ematol\*) or (young people adj3 h?ematol\*) or (young adult adj3 h?ematol\*) or ("teenage and young adult" adj3 lymphom\*) or (teenage\* adj3 lymphom\*) or (adolescen\* adj3 lymphom\*) or (young people adj3 lymphom\*) or (young adult adj3 lymphom\*).ti,ab. or ((exp adolescent/ or exp young adult/) and exp neoplasms/) 337284

3 (Communicat\* or Disclos\* or inform\* or Interact\* or relationship\* or Conversation\* or Dialogue\* or triad\* or Interview\* or consult\* or decision making).ti,ab. or exp communication/ or exp disclosure/ or exp information dissemination/ or exp physician-patient relations/ 6147070

4 (affect\* or effect\* or influenc\* or resultant or impact\* or perception\* or perspective\* or encounter\* or preference or opinion or involvement or occurrence\* or feel or "go through" or experienc\*).ti,ab. 13278879

5 1 and 2 and 3 and 4 3519

6 limit 5 to english language 3399

7 (202211\* or 202212\* or 2023\* or 2024\*).dp. or (202211\* or 202212\* or 2023\* or 2024\*).ez. or (202211\* or 202212\* or 2023\* or 2024\*).ed. or (202211\* or 202212\* or 2023\* or 2024\*).ep. 1958643

8 6 and 7 163

### Embase

Embase <1974 to 2023 December 19>

- 1 (TYA cancer or TYA oncology or AYA cancer or AYA oncology or (young adult adj3 (cancer or oncology or leuk?em\* or lymphom\* or h?ematol\*)) or ("teenage and young adult" adj3 cancer) or ("teenage and young adult" adj3 oncology) or (teenage\* adj3 cancer) or (teenage\* adj3 oncology) or (adolescen\* adj3 cancer) or (adolescen\* adj3 oncology) or (young people adj3 cancer) or (young people adj3 oncology) or ("teenage and young adult" adj3 leuk?emia\*) or (teenage\* adj3 leuk?emia\*) or (adolescen\* adj3 leuk?emia\*) or (young people adj3 leuk?emia\*) or (young adult adj3 leuk?emia\*) or ("teenage and young adult" adj3 h?ematol\*) or (teenage\* adj3 h?ematol\*) or (adolescen\* adj3 h?ematol\*) or (young people adj3 h?ematol\*) or (young adult adj3 h?ematol\*) or ("teenage and young adult" adj3 lymphom\*) or (teenage\* adj3 lymphom\*) or (adolescen\* adj3 lymphom\*) or (young people adj3 lymphom\*) or (young adult adj3 lymphom\*)).ti,ab. or ((exp \*adolescent/ or exp \*young adult/) and exp \*neoplasm/) 10359
- 2 (Communicat\* or Disclos\* or inform\* or Interact\* or relationship\* or Conversation\* or Dialogue\* or triad\* or Interview\* or consult\* or decision making).ti,ab. or exp \*interpersonal communication/ or exp \*professional-patient relationship/ or exp \*information dissemination/ or exp \*conversation/ 7565603
- 3 (Parent\* or guardian\* or mother\* or father\* or partner or wife or wives or husband\* or boyfriend\* or girlfriend\* or sibling\* or friend\* or carer\* or "third person" or caregiver\* or "care-giver\*" or spouse\* or supporter\* or support network\*).ti,ab. or \*parent/ or \*father/ or \*mother/ or \*spouse/ or \*caregiver/ or \*social worker/ or \*sibling/ or \*friend/ or \*legal guardian/ 1440315
- 4 (affect\* or effect\* or influenc\* or resultant or impact\* or perception\* or perspective\* or encounter\* or preference or opinion or involvement or occurrence\* or feel or "go through" or experienc\*).ti,ab. 16593794
- 5 1 and 2 and 3 and 4 1032
- 6 limit 5 to english language 1010
- 7 (202211\* or 202212\* or 2023\* or 2024\*).dc. or (202211\* or 202212\* or 2023\* or 2024\*).dd. or (202211\* or 202212\* or 2023\* or 2024\*).dp.2647560
- 8 6 and 7 107

### PsyclINFO (via Ebsco)

| #   | Query                   | Limiters/Expanders                                                                                                                       | Last Run Via                                                                                                                 | Results |
|-----|-------------------------|------------------------------------------------------------------------------------------------------------------------------------------|------------------------------------------------------------------------------------------------------------------------------|---------|
| S11 | S1 AND S2 AND S7 AND S8 | Limiters -<br>Publication Date:<br>20221101-<br>20241231<br>Expanders - Apply<br>equivalent subjects<br>Search modes -<br>Boolean/Phrase | Interface -<br>EBSCOhost<br>Research<br>Databases<br>Search<br>Screen -<br>Basic<br>Search<br>Database -<br>APA<br>PsyclInfo | 238     |
| S10 | S1 AND S2 AND S7 AND S8 | Expanders - Apply<br>equivalent subjects<br>Narrow by                                                                                    | Interface -<br>EBSCOhost<br>Research                                                                                         | 6,315   |

|    |                                                                                                                                                                                                                 |                                                                              |                                                                                                                                                                                                                        |           |
|----|-----------------------------------------------------------------------------------------------------------------------------------------------------------------------------------------------------------------|------------------------------------------------------------------------------|------------------------------------------------------------------------------------------------------------------------------------------------------------------------------------------------------------------------|-----------|
|    |                                                                                                                                                                                                                 | Language: - english<br>Search modes -<br>Boolean/Phrase                      | Databases<br>Search<br>Screen -<br>Basic<br>Search<br>Database -<br>APA<br>PsycInfo<br><br>Interface -<br>EBSCOhost<br>Research<br>Databases<br>Search<br>Screen -<br>Basic<br>Search<br>Database -<br>APA<br>PsycInfo |           |
| S9 | S1 AND S2 AND S7 AND S8                                                                                                                                                                                         | Expanders - Apply<br>equivalent subjects<br>Search modes -<br>Boolean/Phrase | Interface -<br>EBSCOhost<br>Research<br>Databases<br>Search<br>Screen -<br>Basic<br>Search<br>Database -<br>APA<br>PsycInfo                                                                                            | 6,549     |
| S8 | (affect* or effect* or influenc* or resultant or<br>impact* or perception* or perspective* or<br>encounter* or preference or opinion or<br>involvement or occurrence* or feel or "go<br>through" or experienc*) | Expanders - Apply<br>equivalent subjects<br>Search modes -<br>Boolean/Phrase | Interface -<br>EBSCOhost<br>Research<br>Databases<br>Search<br>Screen -<br>Basic<br>Search<br>Database -<br>APA<br>PsycInfo                                                                                            | 3,524,144 |
| S7 | (S5) or (S3)                                                                                                                                                                                                    | Expanders - Apply<br>equivalent subjects<br>Search modes -<br>Boolean/Phrase | Interface -<br>EBSCOhost<br>Research<br>Databases<br>Search<br>Screen -<br>Basic<br>Search<br>Database -<br>APA<br>PsycInfo                                                                                            | 62,557    |
| S6 | S4 AND S5                                                                                                                                                                                                       | Expanders - Apply<br>equivalent subjects<br>Search modes -<br>Boolean/Phrase | Interface -<br>EBSCOhost<br>Research<br>Databases<br>Search<br>Screen -<br>Basic<br>Search<br>Database -<br>APA<br>PsycInfo                                                                                            | 62,384    |

|    |                                                                                                                                                                                                                                                                                                                                                                                                                                                                                                                                                                                                                                                                                                                                                                                                                                                                                                                             |                                                                        |                                                                                                                 |           |
|----|-----------------------------------------------------------------------------------------------------------------------------------------------------------------------------------------------------------------------------------------------------------------------------------------------------------------------------------------------------------------------------------------------------------------------------------------------------------------------------------------------------------------------------------------------------------------------------------------------------------------------------------------------------------------------------------------------------------------------------------------------------------------------------------------------------------------------------------------------------------------------------------------------------------------------------|------------------------------------------------------------------------|-----------------------------------------------------------------------------------------------------------------|-----------|
| S5 | ( (DE "neoplasms" OR DE "Benign Neoplasms" OR DE "Breast Neoplasms" OR DE "Endocrine Neoplasms" OR DE "Leukemias" OR DE "Melanoma" OR DE "Metastasis" OR DE "Nervous System Neoplasms" OR DE "Terminal Cancer"))                                                                                                                                                                                                                                                                                                                                                                                                                                                                                                                                                                                                                                                                                                            | Expanders - Apply equivalent subjects<br>Search modes - Boolean/Phrase | Interface - EBSCOhost<br>Research Databases<br>Search<br>Screen - Basic<br>Search<br>Database - APA<br>PsycInfo | 62,384    |
| S4 | ( (DE "neoplasms" OR DE "Benign Neoplasms" OR DE "Breast Neoplasms" OR DE "Endocrine Neoplasms" OR DE "Leukemias" OR DE "Melanoma" OR DE "Metastasis" OR DE "Nervous System Neoplasms" OR DE "Terminal Cancer"))                                                                                                                                                                                                                                                                                                                                                                                                                                                                                                                                                                                                                                                                                                            | Expanders - Apply equivalent subjects<br>Search modes - Boolean/Phrase | Interface - EBSCOhost<br>Research Databases<br>Search<br>Screen - Basic<br>Search<br>Database - APA<br>PsycInfo | 62,384    |
| S3 | ("TYA cancer" or "TYA oncology" or "AYA cancer" or "AYA oncology" or ("young adult" n3 (cancer or oncology or leuk?em* or lymphom* or h?ematol*)) or ("teenage and young adult" n3 cancer) or ("teenage and young adult" n3 oncology) or (teenage* n3 cancer) or (teenage* n3 oncology) or (adolescen* n3 cancer) or (adolescen* n3 oncology) or ("young people" n3 cancer) or ("young people" n3 oncology) or ("teenage and young adult" n3 leuk?emia*) or (teenage* n3 leuk?emia*) or (adolescen* n3 leuk?emia*) or ("young people" n3 leuk?emia*) or ("young adult" n3 leuk?emia*) or ("teenage and young adult" n3 h?ematol*) or (teenage* n3 h?ematol*) or (adolescen* n3 h?ematol*) or ("young people" n3 h?ematol*) or ("young adult" n3 h?ematol*) or ("teenage and young adult" n3 lymphom*) or (teenage* n3 lymphom*) or (adolescen* n3 lymphom*) or ("young people" n3 lymphom*) or ("young adult" n3 lymphom*)) | Expanders - Apply equivalent subjects<br>Search modes - Boolean/Phrase | Interface - EBSCOhost<br>Research Databases<br>Search<br>Screen - Basic<br>Search<br>Database - APA<br>PsycInfo | 2,072     |
| S2 | (Communicat* or Disclos* or inform* or Interact* or relationship* or Conversation* or Dialogue* or triad* or Interview* or consult* or "decision making") or DE "communication" OR DE "information dissemination" OR DE "conversation"                                                                                                                                                                                                                                                                                                                                                                                                                                                                                                                                                                                                                                                                                      | Expanders - Apply equivalent subjects<br>Search modes - Boolean/Phrase | Interface - EBSCOhost<br>Research Databases<br>Search<br>Screen - Basic<br>Search<br>Database - APA<br>PsycInfo | 2,545,968 |

|    |                                                                                                                                                                                                                                                                                                                                                                                                                                                                      |                                                                        |                                                                                                          |         |
|----|----------------------------------------------------------------------------------------------------------------------------------------------------------------------------------------------------------------------------------------------------------------------------------------------------------------------------------------------------------------------------------------------------------------------------------------------------------------------|------------------------------------------------------------------------|----------------------------------------------------------------------------------------------------------|---------|
| S1 | (Parent* or guardian* or mother* or father* or partner or wife or wives or husband* or boyfriend* or girlfriend* or sibling* or friend* or teacher* or social worker* or carer* or "third person" or caregiver* or "care-giver*" or spouse* or chaperone*) OR DE "parents" OR DE "mothers" OR DE "fathers" OR DE "spouses" OR DE "wives" OR DE "husbands" OR DE "siblings" OR DE "significant others" OR DE "social workers" OR DE "guardianship" OR DE "caregivers" | Expanders - Apply equivalent subjects<br>Search modes - Boolean/Phrase | Interface - EBSCOhost<br>Research Databases<br>Search Screen - Basic<br>Search Database - APA<br>PsyInfo | 937,154 |
|----|----------------------------------------------------------------------------------------------------------------------------------------------------------------------------------------------------------------------------------------------------------------------------------------------------------------------------------------------------------------------------------------------------------------------------------------------------------------------|------------------------------------------------------------------------|----------------------------------------------------------------------------------------------------------|---------|

## CINAHL (via Ebsco)

Wednesday, December 20, 2023 4:07:56 PM

| #  | Query                   | Limiters/Expanders                                                                                                       | Last Run Via                                                                                        | Results |
|----|-------------------------|--------------------------------------------------------------------------------------------------------------------------|-----------------------------------------------------------------------------------------------------|---------|
| S7 | S1 AND S2 AND S3 AND S4 | Limiters - Publication Date: 20221101-20241231<br>Expanders - Apply equivalent subjects<br>Search modes - Boolean/Phrase | Interface - EBSCOhost<br>Research Databases<br>Search Screen - Advanced<br>Search Database - CINAHL | 99      |
| S6 | S1 AND S2 AND S3 AND S4 | Expanders - Apply equivalent subjects<br>Narrow by Language: - english<br>Search modes - Boolean/Phrase                  | Interface - EBSCOhost<br>Research Databases<br>Search Screen - Advanced<br>Search Database - CINAHL | 2,152   |
| S5 | S1 AND S2 AND S3 AND S4 | Expanders - Apply equivalent subjects<br>Search modes - Boolean/Phrase                                                   | Interface - EBSCOhost<br>Research Databases<br>Search Screen - Advanced<br>Search Database - CINAHL | 2,189   |

|    |                                                                                                                                                                                                                                                                                                                                                                                                                                                                                                                                                                                                                                                                                                                                                                                                                                                                                                                                                                                                 |                                                                        |                                                                                                  |           |
|----|-------------------------------------------------------------------------------------------------------------------------------------------------------------------------------------------------------------------------------------------------------------------------------------------------------------------------------------------------------------------------------------------------------------------------------------------------------------------------------------------------------------------------------------------------------------------------------------------------------------------------------------------------------------------------------------------------------------------------------------------------------------------------------------------------------------------------------------------------------------------------------------------------------------------------------------------------------------------------------------------------|------------------------------------------------------------------------|--------------------------------------------------------------------------------------------------|-----------|
| S4 | (affect* or effect* or influenc* or resultant or impact* or perception* or perspective* or encounter* or preference or opinion or involvement or occurrence* or feel or "go through" or experienc*)                                                                                                                                                                                                                                                                                                                                                                                                                                                                                                                                                                                                                                                                                                                                                                                             | Expanders - Apply equivalent subjects<br>Search modes - Boolean/Phrase | Interface - EBSCOhost<br>Research Databases<br>Search Screen - Advanced Search Database - CINAHL | 3,149,468 |
| S3 | ("TYA cancer" or "TYA oncology" or "AYA cancer" or "AYA oncology" or ("young adult" n3 (cancer or oncology or leuk?em* or lymphom* or h?ematol*)) or ("teenage and young adult" n3 cancer) or ("teenage and young adult" n3 oncology) or (teenage* n3 cancer) or (teenage* n3 oncology) or (adolescen* n3 cancer) or (adolescen* n3 oncology) or ("young people" n3 cancer) or ("young people" n3 oncology) or ("teenage and young adult" n3 leuk?emia*) or (teenage* n3 leuk?emia*) or (adolescen* n3 leuk?emia*) or ("young people" n3 leuk?emia*) or ("young adult" n3 leuk?emia*) or ("teenage and young adult" n3 h?ematol*) or (teenage* n3 h?ematol*) or (adolescen* n3 h?ematol*) or ("young people" n3 h?ematol*) or ("young adult" n3 h?ematol*) or ("teenage and young adult" n3 lymphom*) or (teenage* n3 lymphom*) or (adolescen* n3 lymphom*) or ("young people" n3 lymphom*) or ("young adult" n3 lymphom*)) OR ((MH "adolescence+" OR MH "young adult+") AND (MH "neoplasms+")) | Expanders - Apply equivalent subjects<br>Search modes - Boolean/Phrase | Interface - EBSCOhost<br>Research Databases<br>Search Screen - Advanced Search Database - CINAHL | 61,263    |
| S2 | (Communicat* or Disclos* or inform* or Interact* or relationship* or Conversation* or Dialogue* or triad* or Interview* or consult* or "decision making") or MH "communication+" OR MH "discussion" OR MH "conversation"                                                                                                                                                                                                                                                                                                                                                                                                                                                                                                                                                                                                                                                                                                                                                                        | Expanders - Apply equivalent subjects<br>Search modes - Boolean/Phrase | Interface - EBSCOhost<br>Research Databases<br>Search Screen - Advanced                          | 2,080,061 |

|    |                                                                                                                                                                                                                                                                                                                                                                                                        |                                                                        |                                                                                                     |         |
|----|--------------------------------------------------------------------------------------------------------------------------------------------------------------------------------------------------------------------------------------------------------------------------------------------------------------------------------------------------------------------------------------------------------|------------------------------------------------------------------------|-----------------------------------------------------------------------------------------------------|---------|
|    | OR (MH "Professional-Patient Relations+")                                                                                                                                                                                                                                                                                                                                                              |                                                                        | Search Database - CINAHL                                                                            |         |
| S1 | (Parent* or guardian* or mother* or father* or partner or wife or wives or husband* or boyfriend* or girlfriend* or sibling* or friend* or teacher* or social worker* or carer* or "third person" or caregiver* or "care-giver*" or spouse* or chaperone*) OR MH "parents" OR MH "mothers" OR MH "fathers" OR MH "spouses" OR MH "siblings" OR MH "teachers" OR MH "social workers" OR MH "caregivers" | Expanders - Apply equivalent subjects<br>Search modes - Boolean/Phrase | Interface - EBSCOhost<br>Research Databases<br>Search Screen - Advanced Search<br>Database - CINAHL | 567,768 |

### Web of Science Core Collection

# Web of Science Search Strategy (v0.1)

# Database: Web of Science Core Collection

# Entitlements:

- WOS.IC: 1993 to 2023
- WOS.CCR: 1985 to 2023
- WOS.SCI: 1900 to 2023
- WOS.AHCI: 1975 to 2023
- WOS.BHCI: 2008 to 2023
- WOS.BSCI: 2008 to 2023
- WOS.ESCI: 2018 to 2023
- WOS.ISTP: 1990 to 2023
- WOS.SSCI: 1956 to 2023
- WOS.ISSHP: 1990 to 2023

# Searches:

1: TS=(Parent\* or guardian\* or mother\* or father\* or partner or wife or wives or husband\* or boyfriend\* or girlfriend\* or sibling\* or friend\* or teacher\* or social worker\* or carer\* or "third person" or caregiver\* or "care-giver\*" or spouse\* or chaperone\*)

Date Run: Wed Dec 20 2023 16:03:59 GMT+0000 (Greenwich Mean Time)

Results: 2283955

2: TS=("TYA cancer" or "TYA oncology" or "AYA cancer" or "AYA oncology" or ("young adult" near/3 (cancer or oncology or leuk?em\* or lymphom\* or h?ematol\*)) or ("teenage and young adult" near/3 cancer) or ("teenage and young adult" near/3 oncology) or (teenage\*

near/3 cancer) or (teenage\* near/3 oncology) or (adolescen\* near/3 cancer) or (adolescen\* near/3 oncology) or ("young people" near/3 cancer) or ("young people" near/3 oncology) or ("teenage and young adult" near/3 leuk?emia\*) or (teenage\* near/3 leuk?emia\*) or (adolescen\* near/3 leuk?emia\*) or ("young people" near/3 leuk?emia\*) or ("young adult" near/3 leuk?emia\*) or ("teenage and young adult" near/3 h?ematol\*) or (teenage\* near/3 h?ematol\*) or (adolescen\* near/3 h?ematol\*) or ("young people" near/3 h?ematol\*) or ("young adult" near/3 h?ematol\*) or ("teenage and young adult" near/3 lymphom\*) or (teenage\* near/3 lymphom\*) or (adolescen\* near/3 lymphom\*) or ("young people" near/3 lymphom\*) or ("young adult" near/3 lymphom\*)  
 Date Run: Wed Dec 20 2023 16:04:06 GMT+0000 (Greenwich Mean Time) Results: 8540

3: TS=( Communicat\* or Disclos\* or inform\* or Interact\* or relationship\* or Conversation\* or Dialogue\* or triad\* or Interview\* or consult\* or "decision making")  
 Date Run: Wed Dec 20 2023 16:04:13 GMT+0000 (Greenwich Mean Time)  
 Results: 12748181

4: TS= (affect\* or effect\* or influenc\* or resultant or impact\* or perception\* or perspective\* or encounter\* or preference or opinion or involvement or occurrence\* or feel or "go through" or experienc\*)  
 Date Run: Wed Dec 20 2023 16:04:19 GMT+0000 (Greenwich Mean Time) Results: 26006930

5: #4 AND #3 AND #2 AND #1  
 Date Run: Wed Dec 20 2023 16:04:26 GMT+0000 (Greenwich Mean Time) Results: 764

6: #4 AND #3 AND #2 AND #1 and English (Languages)  
 Date Run: Wed Dec 20 2023 16:04:35 GMT+0000 (Greenwich Mean Time) Results: 737

7: #4 AND #3 AND #2 AND #1 and English (Languages) and 2022 or 2023 (Publication Years)  
 Date Run: Wed Dec 20 2023 16:04:39 GMT+0000 (Greenwich Mean Time) Results: 132

#### [AMED via Ovid](#)

AMED (Allied and Complementary Medicine) <1985 to October 2023>

1 (Parent\* or guardian\* or mother\* or father\* or partner or wife or wives or husband\* or boyfriend\* or girlfriend\* or sibling\* or friend\* or carer\* or "third person" or caregiver\* or "care-giver\*" or spouse\* or supporter\* or support network\*).ti,ab. 14291

2 (TYA cancer or TYA oncology or AYA cancer or AYA oncology or (young adult adj3 (cancer or oncology or leuk?em\* or lymphom\* or h?ematol\*)) or ("teenage and young adult" adj3 cancer) or ("teenage and young adult" adj3 oncology) or (teenage\* adj3 cancer) or (teenage\* adj3 oncology) or (adolescen\* adj3 cancer) or (adolescen\* adj3 oncology) or (young people adj3 cancer) or (young people adj3 oncology) or ("teenage and young adult" adj3 leuk?emia\*) or (teenage\* adj3 leuk?emia\*) or (adolescen\* adj3 leuk?emia\*) or (young people adj3 leuk?emia\*) or (young adult adj3 leuk?emia\*) or ("teenage and young adult" adj3 h?ematol\*) or (teenage\* adj3 h?ematol\*) or (adolescen\* adj3 h?ematol\*) or (young people adj3 h?ematol\*) or (young adult adj3 h?ematol\*) or ("teenage and young adult" adj3



lymphom\*) or (teenage\* adj3 lymphom\*) or (adolescen\* adj3 lymphom\*) or (young people adj3 lymphom\*) or (young adult adj3 lymphom\*).ti,ab. 120

3 (Communicat\* or Disclos\* or inform\* or Interact\* or relationship\* or Conversation\* or Dialogue\* or triad\* or Interview\* or consult\* or decision making).ti,ab. 60609

4 (affect\* or effect\* or influenc\* or resultant or impact\* or perception\* or perspective\* or encounter\* or preference or opinion or involvement or occurrence\* or feel or "go through" or experienc\*).ti,ab. 143225

5 1 and 2 and 3 and 4 19

6 limit 5 to yr="2005 -Current" 14

## First run – November 2022

### Medline (via Ovid)

Ovid MEDLINE(R) and Epub Ahead of Print, In-Process, In-Data-Review & Other Non-Indexed Citations, Daily and Versions <1946 to November 23, 2022>

- 1 (Parent\* or guardian\* or mother\* or father\* or partner or wife or wives or husband\* or boyfriend\* or girlfriend\* or sibling\* or friend\* or carer\* or "third person" or caregiver\* or "care-giver\*" or spouse\* or supporter\* or support network\*).ti,ab. or parents/ or fathers/ or mothers/ or spouses/ or caregivers/ or siblings/ or friends/ or legal guardians/ 1074121
- 2 (TYA cancer or TYA oncology or AYA cancer or AYA oncology or (young adult adj3 (cancer or oncology or leuk?em\* or lymphom\* or h?ematol\*)) or ("teenage and young adult" adj3 cancer) or ("teenage and young adult" adj3 oncology) or (teenage\* adj3 cancer) or (teenage\* adj3 oncology) or (adolescen\* adj3 cancer) or (adolescen\* adj3 oncology) or (young people adj3 cancer) or (young people adj3 oncology) or ("teenage and young adult" adj3 leuk?emia\*) or (teenage\* adj3 leuk?emia\*) or (adolescen\* adj3 leuk?emia\*) or (young people adj3 leuk?emia\*) or (young adult adj3 leuk?emia\*) or ("teenage and young adult" adj3 h?ematol\*) or (teenage\* adj3 h?ematol\*) or (adolescen\* adj3 h?ematol\*) or (young people adj3 h?ematol\*) or (young adult adj3 h?ematol\*) or ("teenage and young adult" adj3 lymphom\*) or (teenage\* adj3 lymphom\*) or (adolescen\* adj3 lymphom\*) or (young people adj3 lymphom\*) or (young adult adj3 lymphom\*)).ti,ab. or ((exp adolescent/ or exp young adult/) and exp neoplasms/) 333070
- 3 (Communicat\* or Disclos\* or inform\* or Interact\* or relationship\* or Conversation\* or Dialogue\* or triad\* or Interview\* or consult\* or decision making).ti,ab. or exp communication/ or exp disclosure/ or exp information dissemination/ or exp physician-patient relations/ 5715959
- 4 (affect\* or effect\* or influenc\* or resultant or impact\* or perception\* or perspective\* or encounter\* or preference or opinion or involvement or occurrence\* or feel or "go through" or experienc\*).ti,ab. 12406352
- 5 1 and 2 and 3 and 4 3380
- 6 limit 5 to (english language and yr="2005 -Current") 2715

### Embase (via Ovid)

Embase <1974 to 2022 November 23>

1 (TYA cancer or TYA oncology or AYA cancer or AYA oncology or (young adult adj3 (cancer or oncology or leuk?em\* or lymphom\* or h?ematol\*)) or ("teenage and young adult" adj3 cancer) or ("teenage and young adult" adj3 oncology) or (teenage\* adj3 cancer) or (teenage\* adj3 oncology) or (adolescen\* adj3 cancer) or (adolescen\* adj3 oncology) or (young people adj3 cancer) or (young people adj3 oncology) or ("teenage and young adult" adj3 leuk?emia\*) or (teenage\* adj3 leuk?emia\*) or (adolescen\* adj3 leuk?emia\*) or (young people adj3 leuk?emia\*) or (young adult adj3 leuk?emia\*) or ("teenage and young adult" adj3 h?ematol\*) or (teenage\* adj3 h?ematol\*) or (adolescen\* adj3 h?ematol\*) or (young people adj3 h?ematol\*) or (young adult adj3 h?ematol\*) or ("teenage and young adult" adj3 lymphom\*) or (teenage\* adj3 lymphom\*) or (adolescen\* adj3 lymphom\*) or (young people adj3 lymphom\*) or (young adult adj3 lymphom\*)).ti,ab. or ((exp \*adolescent/ or exp \*young adult/) and exp \*neoplasm/) 9638

2 (Communicat\* or Disclos\* or inform\* or Interact\* or relationship\* or Conversation\* or Dialogue\* or triad\* or Interview\* or consult\* or decision making).ti,ab. or exp \*interpersonal communication/ or exp \*professional-patient relationship/ or exp \*information dissemination/ or exp \*conversation/ 6997005

3 (Parent\* or guardian\* or mother\* or father\* or partner or wife or wives or husband\* or boyfriend\* or girlfriend\* or sibling\* or friend\* or carer\* or "third person" or caregiver\* or "care-giver\*" or spouse\* or supporter\* or support network\*).ti,ab. or \*parent/ or \*father/ or \*mother/ or \*spouse/ or \*caregiver/ or \*social worker/ or \*sibling/ or \*friend/ or \*legal guardian/ 1339977

4 (affect\* or effect\* or influenc\* or resultant or impact\* or perception\* or perspective\* or encounter\* or preference or opinion or involvement or occurrence\* or feel or "go through" or experienc\*).ti,ab. 15453173

5 1 and 2 and 3 and 4 939

6 limit 5 to (english language and yr="2005 -Current") 873

## PsycInfo (via Ebscohost)

| #   | Query                   | Limiters/Expanders                                                                                                                                               | Last Run Via                                                                                                 | Results |
|-----|-------------------------|------------------------------------------------------------------------------------------------------------------------------------------------------------------|--------------------------------------------------------------------------------------------------------------|---------|
| S11 | S1 AND S2 AND S7 AND S8 | Limiters -<br>Publication Year:<br>2005-2022<br>Expanders - Apply<br>equivalent subjects<br>Narrow by<br>Language: - english<br>Search modes -<br>Boolean/Phrase | Interface - EBSCOhost<br>Research Databases<br>Search Screen - Basic<br>Search<br>Database - APA<br>PsycInfo | 1,683   |
| S10 | S1 AND S2 AND S7 AND S8 | Expanders - Apply<br>equivalent subjects<br>Narrow by<br>Language: - english                                                                                     | Interface - EBSCOhost<br>Research Databases<br>Search Screen - Basic<br>Search                               | 1,981   |

|    |                                                                                                                                                                                                                                                                                                                      |                                                                                                                               |                                                                                                  |           |
|----|----------------------------------------------------------------------------------------------------------------------------------------------------------------------------------------------------------------------------------------------------------------------------------------------------------------------|-------------------------------------------------------------------------------------------------------------------------------|--------------------------------------------------------------------------------------------------|-----------|
|    |                                                                                                                                                                                                                                                                                                                      | Search modes - Boolean/Phrase                                                                                                 | Database - APA PsycInfo                                                                          |           |
|    |                                                                                                                                                                                                                                                                                                                      | Expanders - Apply equivalent subjects                                                                                         | Interface - EBSCOhost Research Databases Search Screen - Basic Search                            |           |
| S9 | S1 AND S2 AND S7 AND S8                                                                                                                                                                                                                                                                                              | Search modes - Boolean/Phrase                                                                                                 | Database - APA PsycInfo                                                                          | 2,017     |
| S8 | (affect* or effect* or influenc* or resultant or impact* or perception* or perspective* or encounter* or preference or opinion or involvement or occurance* or feel or "go through" or experienc*)                                                                                                                   | Expanders - Apply equivalent subjects<br>Search modes - Boolean/Phrase                                                        | Interface - EBSCOhost Research Databases Search Screen - Basic Search<br>Database - APA PsycInfo | 3,366,619 |
| S7 | (S5) or (S3 )                                                                                                                                                                                                                                                                                                        | Expanders - Apply equivalent subjects<br>Search modes - Boolean/Phrase                                                        | Interface - EBSCOhost Research Databases Search Screen - Basic Search<br>Database - APA PsycInfo | 13,719    |
| S6 | S4 AND S5                                                                                                                                                                                                                                                                                                            | Expanders - Apply equivalent subjects<br>Narrow by SubjectAge: - adolescence (13-17 yrs)                                      | Interface - EBSCOhost Research Databases Search Screen - Basic Search<br>Database - APA PsycInfo | 13,275    |
| S5 | ( (DE "neoplasms" OR DE "Benign Neoplasms" OR DE "Breast Neoplasms" OR DE "Endocrine Neoplasms" OR DE "Leukemias" OR DE "Melanoma" OR DE "Metastasis" OR DE "Nervous System Neoplasms" OR DE "Terminal Cancer"))                                                                                                     | Expanders - Apply equivalent subjects<br>Narrow by SubjectAge: - young adulthood (18-29 yrs)<br>Search modes - Boolean/Phrase | Interface - EBSCOhost Research Databases Search Screen - Basic Search<br>Database - APA PsycInfo | 13,275    |
| S4 | ( (DE "neoplasms" OR DE "Benign Neoplasms" OR DE "Breast Neoplasms" OR DE "Endocrine Neoplasms" OR DE "Leukemias" OR DE "Melanoma" OR DE "Metastasis" OR DE "Nervous System Neoplasms" OR DE "Terminal Cancer"))                                                                                                     | Expanders - Apply equivalent subjects<br>Search modes - Boolean/Phrase                                                        | Interface - EBSCOhost Research Databases Search Screen - Basic Search<br>Database - APA PsycInfo | 58,767    |
| S3 | ("TYA cancer" or "TYA oncology" or "AYA cancer" or "AYA oncology" or ("young adult" n3 (cancer or oncology or leuk?em* or lymphom* or h?ematol*)) or ("teenage and young adult" n3 cancer) or ("teenage and young adult" n3 oncology) or (teenage* n3 cancer) or (teenage* n3 oncology) or (adolescen* n3 cancer) or | Expanders - Apply equivalent subjects<br>Search modes - Boolean/Phrase                                                        | Interface - EBSCOhost Research Databases Search Screen - Basic Search<br>Database - APA PsycInfo | 1,864     |

|    |                                                                                                                                                                                                                                                                                                                                                                                                                                                                                                                                                                                                       |                                                                        |                                                                                                              |           |
|----|-------------------------------------------------------------------------------------------------------------------------------------------------------------------------------------------------------------------------------------------------------------------------------------------------------------------------------------------------------------------------------------------------------------------------------------------------------------------------------------------------------------------------------------------------------------------------------------------------------|------------------------------------------------------------------------|--------------------------------------------------------------------------------------------------------------|-----------|
|    | (adolescen* n3 oncology) or ("young people" n3 cancer) or ("young people" n3 oncology) or ("teenage and young adult" n3 leuk?emia*) or (teenage* n3 leuk?emia*) or (adolescen* n3 leuk?emia*) or ("young people" n3 leuk?emia*) or ("young adult" n3 leuk?emia*) or ("teenage and young adult" n3 h?ematol*) or (teenage* n3 h?ematol*) or (adolescen* n3 h?ematol*) or ("young people" n3 h?ematol*) or ("young adult" n3 h?ematol*) or ("teenage and young adult" n3 lymphom*) or (teenage* n3 lymphom*) or (adolescen* n3 lymphom*) or ("young people" n3 lymphom*) or ("young adult" n3 lymphom*) |                                                                        |                                                                                                              |           |
| S2 | (Communicat* or Disclos* or inform* or Interact* or relationship* or Conversation* or Dialogue* or triad* or Interview* or consult* or "decision making") or DE "communication" OR DE "information dissemination" OR DE "conversation"                                                                                                                                                                                                                                                                                                                                                                | Expanders - Apply equivalent subjects<br>Search modes - Boolean/Phrase | Interface - EBSCOhost<br>Research Databases<br>Search Screen - Basic<br>Search<br>Database - APA<br>PsycInfo | 2,423,980 |
| S1 | (Parent* or guardian* or mother* or father* or partner or wife or wives or husband* or boyfriend* or girlfriend* or sibling* or friend* or teacher* or social worker* or carer* or "third person" or caregiver* or "care-giver*" or spouse* or chaperone*) OR DE "parents" OR DE "mothers" OR DE "fathers" OR DE "spouses" OR DE "wives" OR DE "husbands" OR DE "siblings" OR DE "significant others" OR DE "social workers" OR DE "guardianship" OR DE "caregivers"                                                                                                                                  | Expanders - Apply equivalent subjects<br>Search modes - Boolean/Phrase | Interface - EBSCOhost<br>Research Databases<br>Search Screen - Basic<br>Search<br>Database - APA<br>PsycInfo | 894,375   |

## CINAHL (via Ebscohost)

[Accessibility Information and Tips](#)

## Print Search History

Thursday, November 24, 2022 6:21:27 PM

| #  | Query                   | Limiters/Expanders                                                                                                                                            | Last Run Via                                                                                           | Results |
|----|-------------------------|---------------------------------------------------------------------------------------------------------------------------------------------------------------|--------------------------------------------------------------------------------------------------------|---------|
| S7 | S1 AND S2 AND S3 AND S4 | Limiters - Published<br>Date: 20050101-20221231<br>Expanders - Apply equivalent subjects<br>Narrow by Language:<br>- english<br>Search modes - Boolean/Phrase | Interface - EBSCOhost<br>Research Databases<br>Search Screen - Advanced<br>Search<br>Database - CINAHL | 1,837   |

|    |                                                                                                                                                                                                                                                                                                                                                                                                                                                                                                                                          |                                                                                                                        |                                                                                                     |           |
|----|------------------------------------------------------------------------------------------------------------------------------------------------------------------------------------------------------------------------------------------------------------------------------------------------------------------------------------------------------------------------------------------------------------------------------------------------------------------------------------------------------------------------------------------|------------------------------------------------------------------------------------------------------------------------|-----------------------------------------------------------------------------------------------------|-----------|
| S6 | S1 AND S2 AND S3 AND S4                                                                                                                                                                                                                                                                                                                                                                                                                                                                                                                  | Limiters - Published Date: 20050101-20221231<br>Expanders - Apply equivalent subjects<br>Search modes - Boolean/Phrase | Interface - EBSCOhost<br>Research Databases<br>Search Screen - Advanced Search<br>Database - CINAHL | 1,866     |
| S5 | S1 AND S2 AND S3 AND S4                                                                                                                                                                                                                                                                                                                                                                                                                                                                                                                  | Expanders - Apply equivalent subjects<br>Search modes - Boolean/Phrase                                                 | Interface - EBSCOhost<br>Research Databases<br>Search Screen - Advanced Search<br>Database - CINAHL | 2,106     |
| S4 | (affect* or effect* or influenc* or resultant or impact* or perception* or perspective* or encounter* or preference or opinion or involvement or occurrence* or feel or "go through" or experienc*)                                                                                                                                                                                                                                                                                                                                      | Expanders - Apply equivalent subjects<br>Search modes - Boolean/Phrase                                                 | Interface - EBSCOhost<br>Research Databases<br>Search Screen - Advanced Search<br>Database - CINAHL | 3,016,184 |
| S3 | ("TYA cancer" or "TYA oncology" or "AYA cancer" or "AYA oncology" or ("young adult" n3 (cancer or oncology or leuk?em* or lymphom* or h?ematol*)) or ("teenage and young adult" n3 cancer) or ("teenage and young adult" n3 oncology) or (teenage* n3 cancer) or (teenage* n3 oncology) or (adolescen* n3 cancer) or (adolescen* n3 oncology) or ("young people" n3 cancer) or ("young people" n3 oncology) or ("teenage and young adult" n3 leuk?emia*) or (teenage* n3 leuk?emia*) or (adolescen* n3 leuk?emia*) or ("young people" n3 | Expanders - Apply equivalent subjects<br>Search modes - Boolean/Phrase                                                 | Interface - EBSCOhost<br>Research Databases<br>Search Screen - Advanced Search<br>Database - CINAHL | 59,927    |

|    |                                                                                                                                                                                                                                                                                                                                                                                                                                                        |                                                                        |                                                                                                  |           |
|----|--------------------------------------------------------------------------------------------------------------------------------------------------------------------------------------------------------------------------------------------------------------------------------------------------------------------------------------------------------------------------------------------------------------------------------------------------------|------------------------------------------------------------------------|--------------------------------------------------------------------------------------------------|-----------|
|    | leuk?emia*) or ("young adult" n3 leuk?emia*) or ("teenage and young adult" n3 h?ematol*) or (teenage* n3 h?ematol*) or (adolescen* n3 h?ematol*) or ("young people" n3 h?ematol*) or ("young adult" n3 h?ematol*) or ("teenage and young adult" n3 lymphom*) or (teenage* n3 lymphom*) or (adolescen* n3 lymphom*) or ("young people" n3 lymphom*) or ("young adult" n3 lymphom*)) OR ((MH "adolescence+" OR MH "young adult+") AND (MH "neoplasms+")) |                                                                        |                                                                                                  |           |
| S2 | (Communicat* or Disclos* or inform* or Interact* or relationship* or Conversation* or Dialogue* or triad* or Interview* or consult* or "decision making") or MH "communication+" OR MH "discussion" OR MH "conversation" OR (MH "Professional-Patient Relations+")                                                                                                                                                                                     | Expanders - Apply equivalent subjects<br>Search modes - Boolean/Phrase | Interface - EBSCOhost<br>Research Databases<br>Search Screen - Advanced Search Database - CINAHL | 2,016,086 |
| S1 | (Parent* or guardian* or mother* or father* or partner or wife or wives or husband* or boyfriend* or girlfriend* or sibling* or friend* or teacher* or social worker* or carer* or "third person" or caregiver* or "care-giver*" or spouse* or chaperone*) OR MH "parents" OR MH "mothers" OR MH "fathers" OR MH "spouses" OR MH "siblings" OR MH "teachers" OR MH "social workers" OR MH "caregivers"                                                 | Expanders - Apply equivalent subjects<br>Search modes - Boolean/Phrase | Interface - EBSCOhost<br>Research Databases<br>Search Screen - Advanced Search Database - CINAHL | 544,991   |

## Web of Science Core Collection

# Web of Science Search Strategy (v0.1)

# Database: Web of Science Core Collection

# Entitlements:

- WOS.IC: 1993 to 2022

- WOS.CCR: 1985 to 2022

- WOS.SCI: 1900 to 2022
- WOS.AHCI: 1975 to 2022
- WOS.BHCI: 2008 to 2022
- WOS.BSCI: 2008 to 2022
- WOS.ESCI: 2017 to 2022
- WOS.ISTP: 1990 to 2022
- WOS.SSCI: 1956 to 2022
- WOS.ISSHP: 1990 to 2022

#### # Searches:

1: TS=(Parent\* or guardian\* or mother\* or father\* or partner or wife or wives or husband\* or boyfriend\* or girlfriend\* or sibling\* or friend\* or teacher\* or social worker\* or carer\* or "third person" or caregiver\* or "care-giver\*" or spouse\* or chaperone\*)

Results: 2129759

2: TS=("TYA cancer" or "TYA oncology" or "AYA cancer" or "AYA oncology" or ("young adult" near/3 (cancer or oncology or leuk?em\* or lymphom\* or h?ematol\*)) or ("teenage and young adult" near/3 cancer) or ("teenage and young adult" near/3 oncology) or (teenage\* near/3 cancer) or (teenage\* near/3 oncology) or (adolescen\* near/3 cancer) or (adolescen\* near/3 oncology) or ("young people" near/3 cancer) or ("young people" near/3 oncology) or ("teenage and young adult" near/3 leuk?emia\*) or (teenage\* near/3 leuk?emia\*) or (adolescen\* near/3 leuk?emia\*) or ("young people" near/3 leuk?emia\*) or ("young adult" near/3 leuk?emia\*) or ("teenage and young adult" near/3 h?ematol\*) or (teenage\* near/3 h?ematol\*) or (adolescen\* near/3 h?ematol\*) or ("young people" near/3 h?ematol\*) or ("young adult" near/3 h?ematol\*) or ("teenage and young adult" near/3 lymphom\*) or (teenage\* near/3 lymphom\*) or (adolescen\* near/3 lymphom\*) or ("young people" near/3 lymphom\*) or ("young adult" near/3 lymphom\*))

Results: 7793

3: TS=( Communicat\* or Disclos\* or inform\* or Interact\* or relationship\* or Conversation\* or Dialogue\* or triad\* or Interview\* or consult\* or "decision making")

Results: 11889093

4: TS= (affect\* or effect\* or influenc\* or resultant or impact\* or perception\* or perspective\* or encounter\* or preference or opinion or involvement or occurrence\* or feel or "go through" or experienc\*)

Results: 24306121

5: #4 AND #3 AND #2 AND #1

Results: 684

6: #4 AND #3 AND #2 AND #1

Results: 684

7: #4 AND #3 AND #2 AND #1 and 2005 or 2006 or 2007 or 2008 or 2009 or 2010 or 2011 or 2012 or 2013 or 2014 or 2015 or 2016 or 2017 or 2018 or 2019 or 2020 or 2021 or 2022 (Publication Years)

Results: 644



8: #4 AND #3 AND #2 AND #1 and 2005 or 2006 or 2007 or 2008 or 2009 or 2010 or 2011 or 2012 or 2013 or 2014 or 2015 or 2016 or 2017 or 2018 or 2019 or 2020 or 2021 or 2022 (Publication Years) and English (Languages) Results: 619
